# Supplementary material for: The adult human testis transcriptional cell atlas
Source: PubMed Central journal article supplement (PMC6274646; doi:10.1038/s41422-018-0099-2), 2018-10-12
Supplement: 41422_2018_99_MOESM1_ESM.pdf [file 41422_2018_99_MOESM1_ESM.pdf]

**Fig. S1****a**

|                | Total reads | Mean reads/cell | Median gene/cell | Detected gene # | Captured cell #<br>(after filtering) | Experiment ID | Sequencing Saturation | Correlation |
|----------------|-------------|-----------------|------------------|-----------------|--------------------------------------|---------------|-----------------------|-------------|
| Donor #1 Rep 1 | 298 M       | 249,159         | 2,140            | 26,575          | 1,000                                | #1            | 84.0%                 | 0.969       |
| Donor #1 Rep 2 | 300 M       | 196,631         | 2,489            | 27,652          | 1,248                                | #2            | 83.2%                 |             |
| Donor #2 Rep 1 | 263 M       | 248,869         | 2,872            | 27,372          | 985                                  | #3            | 83.9%                 | 0.998       |
| Donor #2 Rep 2 | 289 M       | 261,963         | 3,278            | 27,755          | 1,009                                | #3            | 83.3%                 |             |
| Donor #3 Rep 1 | 270 M       | 212,559         | 2,453            | 27,451          | 1,116                                | #3            | 83.3%                 | 0.997       |
| Donor #3 Rep 2 | 401 M       | 315,596         | 2,311            | 27,521          | 1,132                                | #3            | 87.3%                 |             |

**b**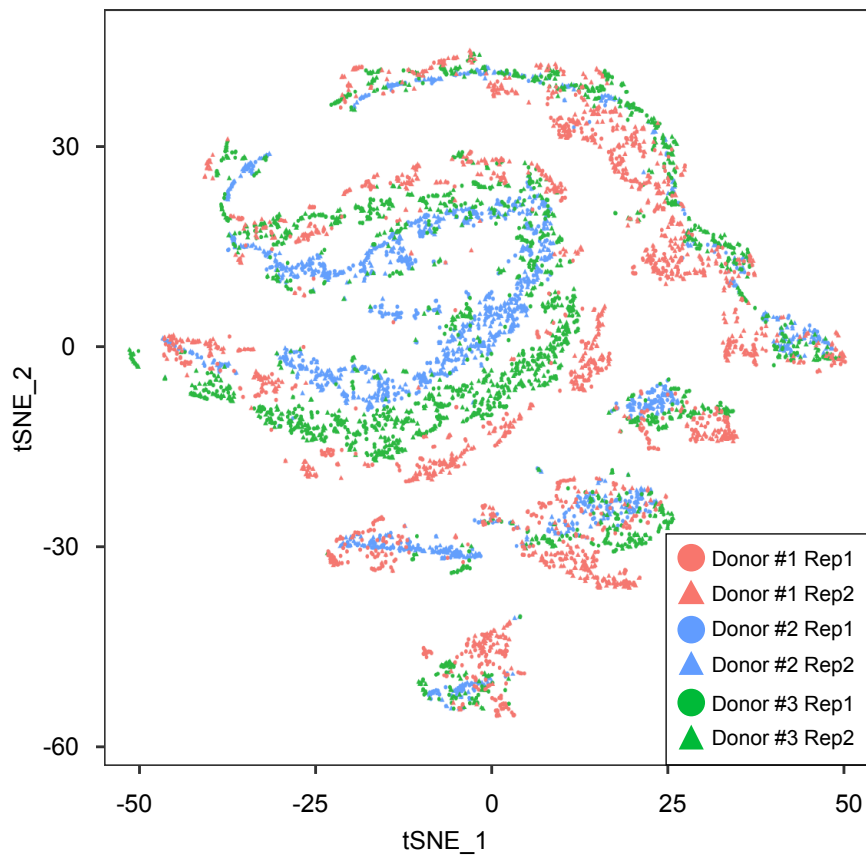**c**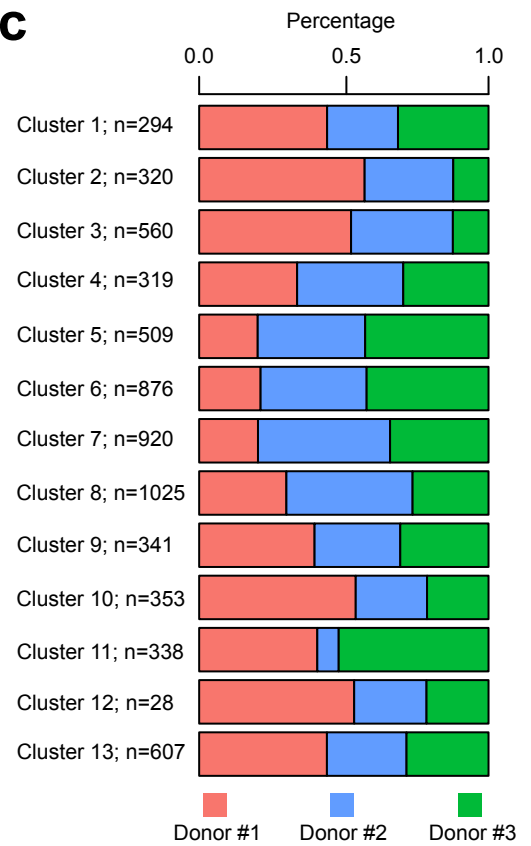**d**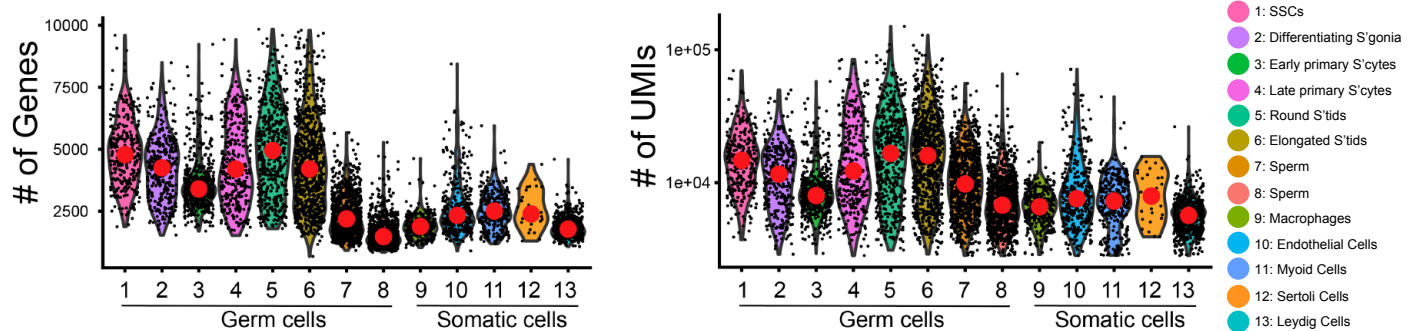

**Fig. S1. Quality Control of Single Cell RNA-seq Datasets.**

(a) Sequencing metrics of the six datasets (n=3 biological replicates; 2 technical duplicates) generated.

(b) tSNE plot of single cell transcriptome with cells colored based on their donors of origin and replicate.

(c) Bar graph showing the distribution of donor origin in different clusters.

(d) Violin plot of number of genes (left) or UMIs (right) for different clusters identified.

Red dot represents the median. UMI: unique molecular identifier.
