# Supplementary material for: The adult human testis transcriptional cell atlas
Source: PubMed Central journal article supplement (PMC6274646; doi:10.1038/s41422-018-0099-2), 2018-10-12
Supplement: 41422_2018_99_MOESM2_ESM.pdf [file 41422_2018_99_MOESM2_ESM.pdf]

**Fig. S2****a**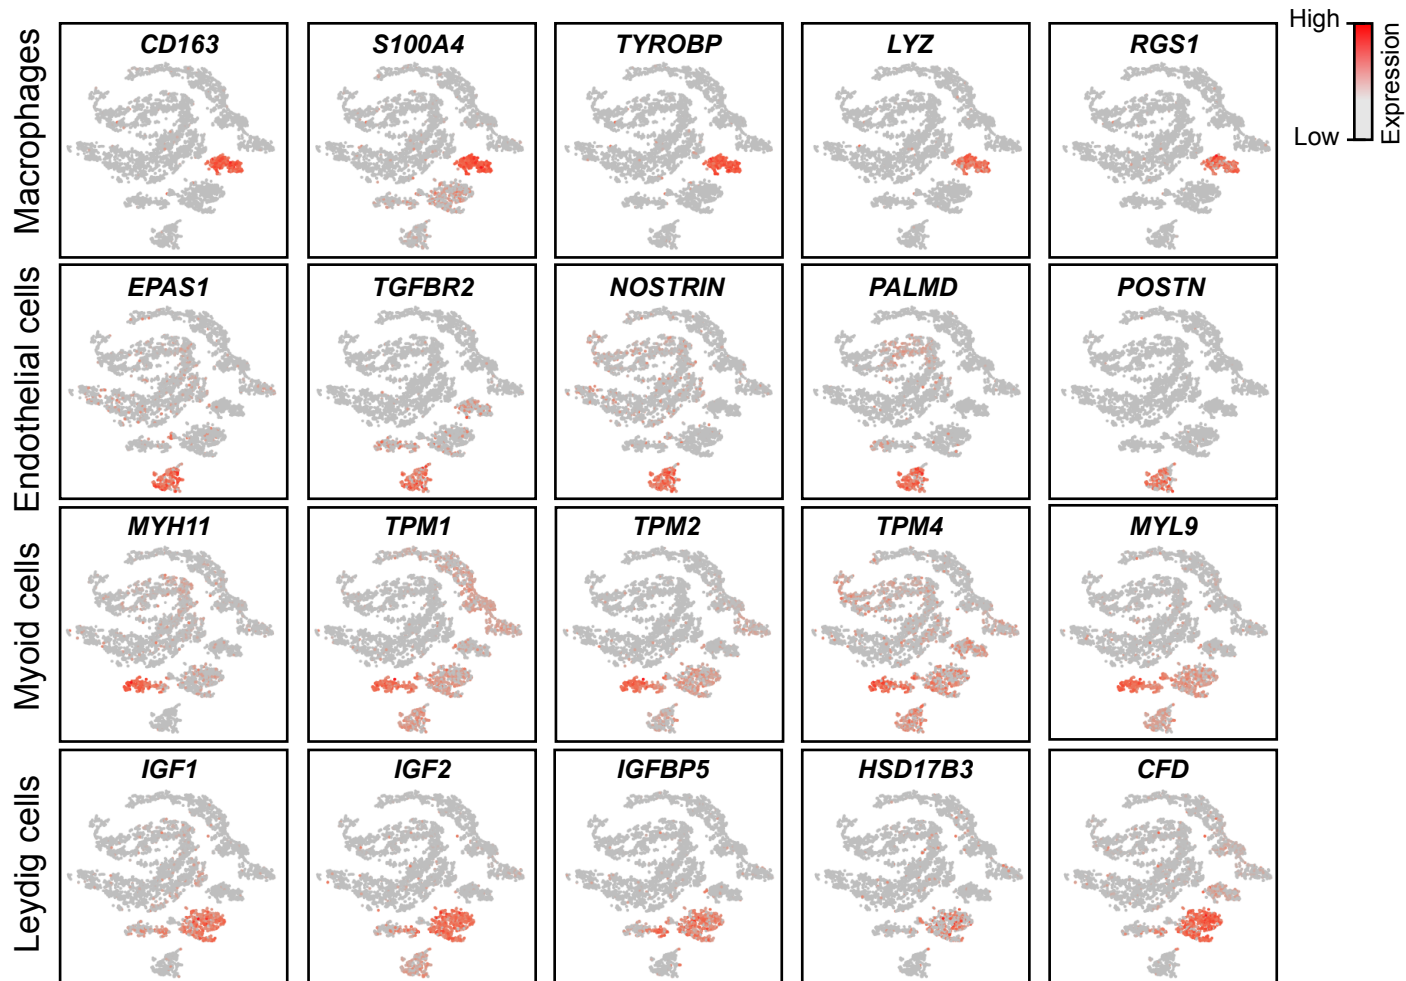**b**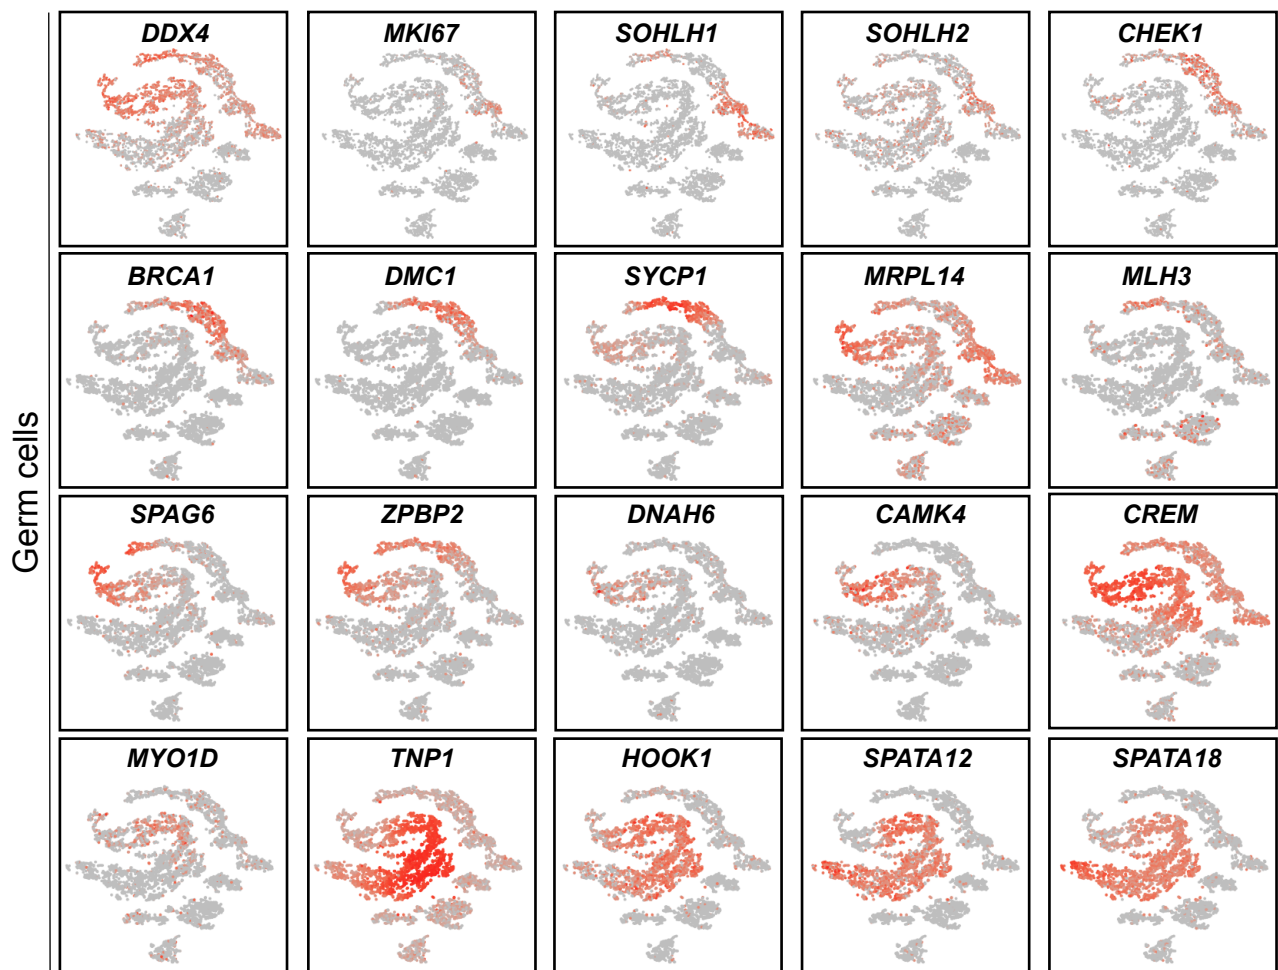

**Fig. S2. Expression Patterns of Example Gene Markers in Different Clusters.**

(a) Gene expression patterns of additional markers in niche cells. Top row: macrophages; second row: endothelial cells; third row: myoid cells; fourth row: Leydig cells.

(b) Gene expression pattern of additional markers in germ cells. Genes marked more differentiated germ cell population as they move from top to the bottom row.
