# Supplementary material for: The adult human testis transcriptional cell atlas
Source: PubMed Central journal article supplement (PMC6274646; doi:10.1038/s41422-018-0099-2), 2018-10-12
Supplement: 41422_2018_99_MOESM3_ESM.pdf [file 41422_2018_99_MOESM3_ESM.pdf]

**Fig. S3**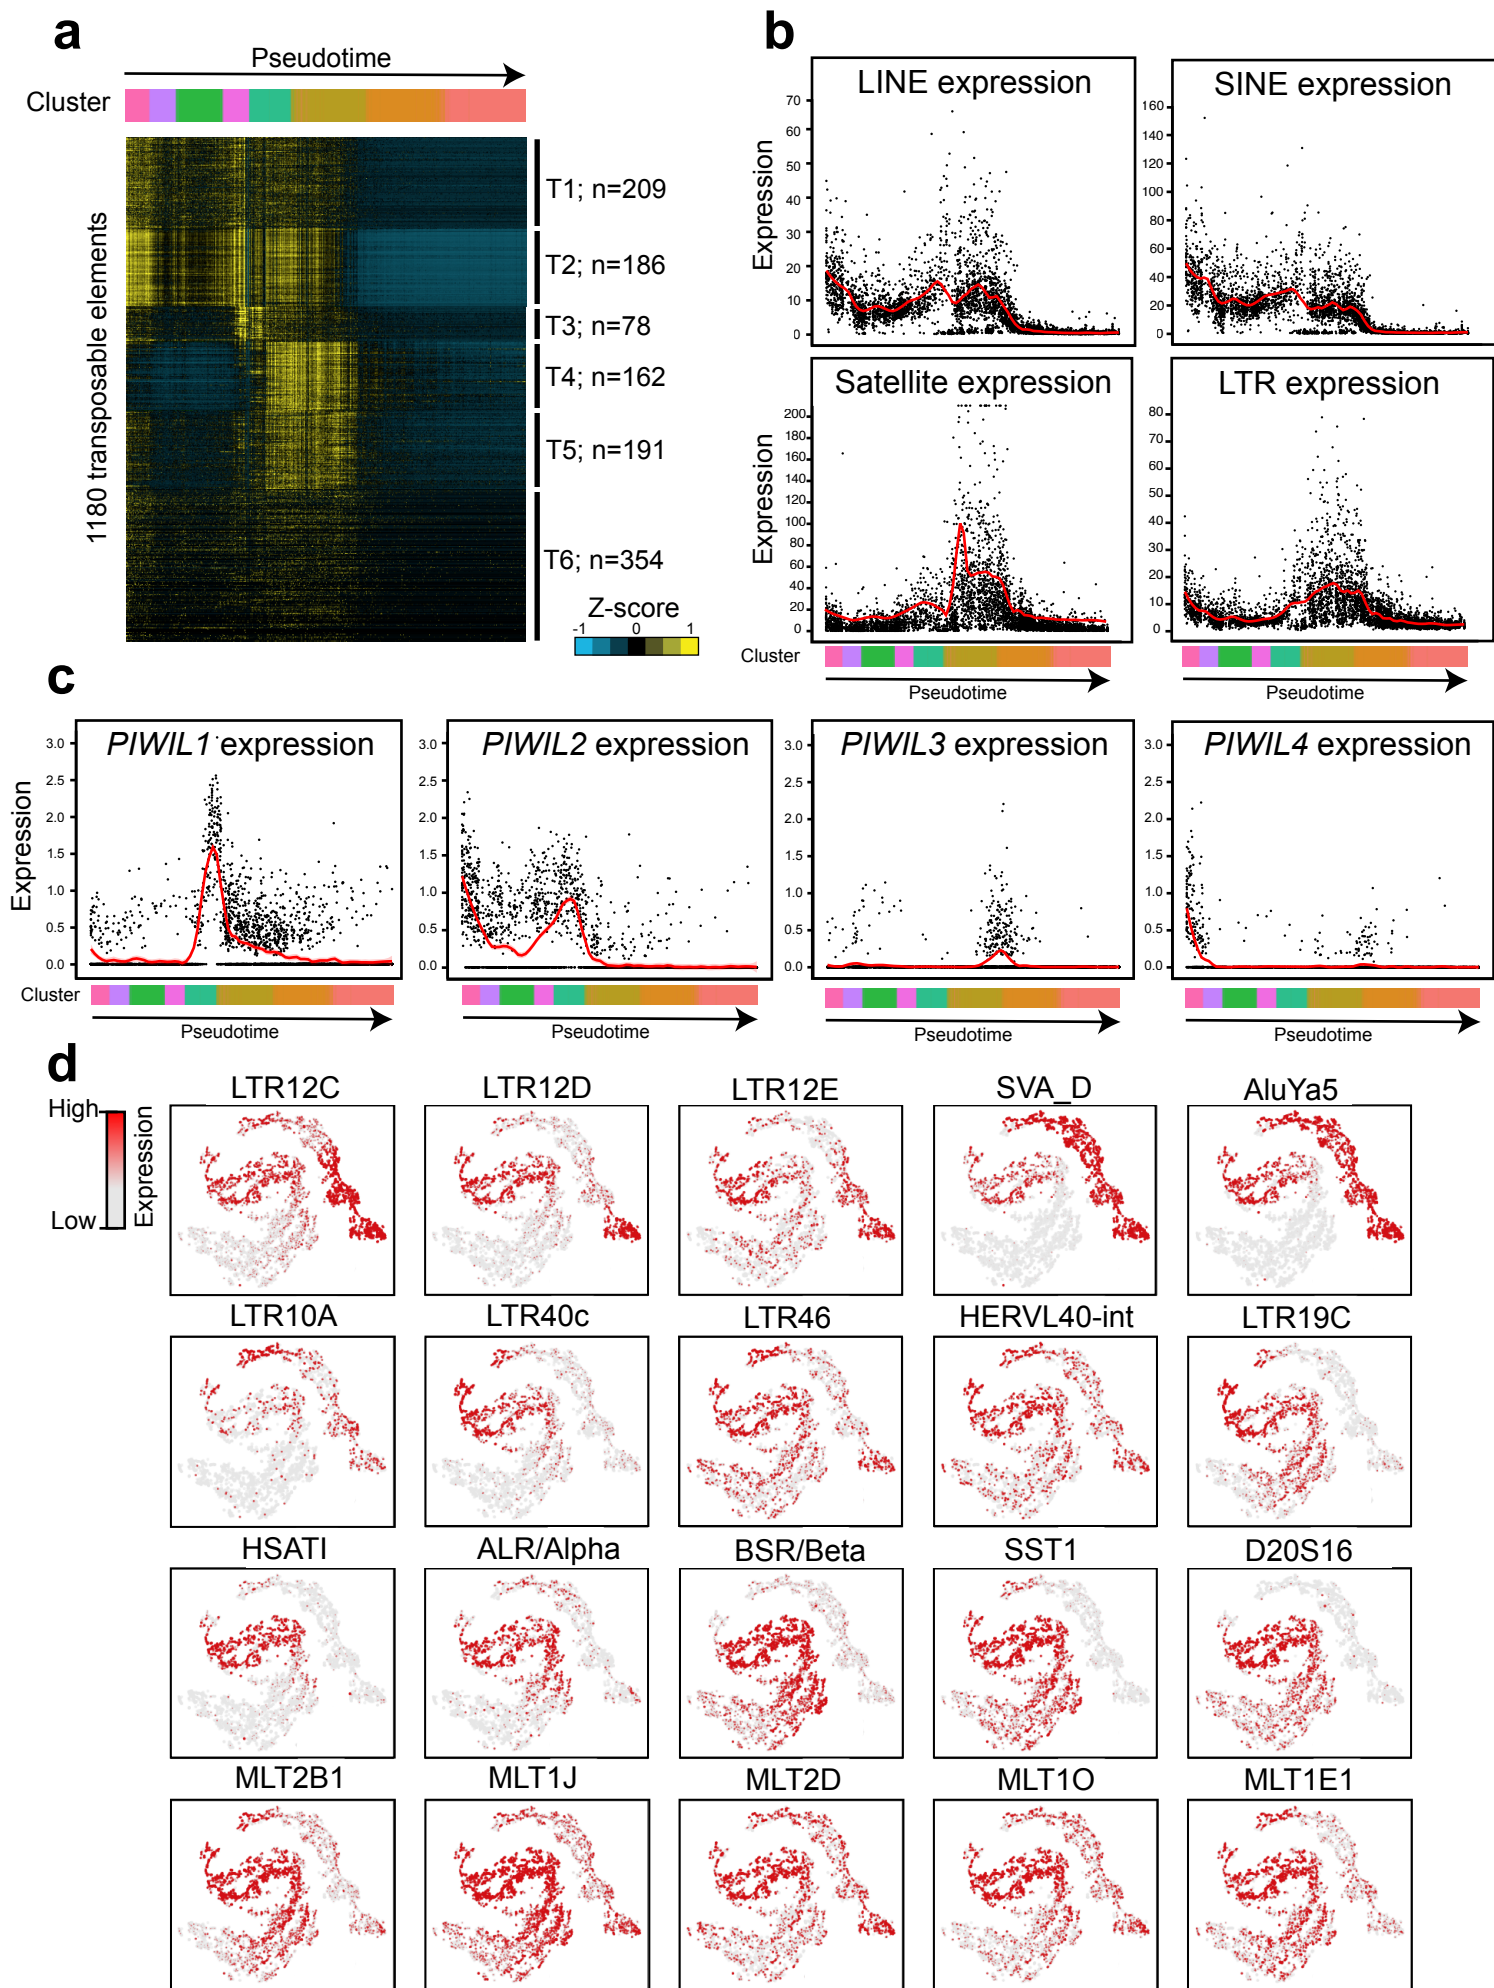

**Fig. S3. Transposable Element (TE) Expression Dynamics during Spermatogenesis.**

(a) K-means clustering (k=6) of transposable elements (TE) during spermatogenesis.

(b) Expression of LINE, SINE, Satellite and LTR during spermatogenesis.

(c) Expression of *PIWIL* genes during spermatogenesis.

(d) Relative expression levels of selected TEs projected on the tSNE plot. Top row shows examples of TEs highly expressed during early spermatogenic phase; second row shows TEs with expression during middle spermatogenesis; third and last rows show TEs expressed during late spermatogenesis.
