# Supplementary material for: The adult human testis transcriptional cell atlas
Source: PubMed Central journal article supplement (PMC6274646; doi:10.1038/s41422-018-0099-2), 2018-10-12
Supplement: 41422_2018_99_MOESM5_ESM.pdf [file 41422_2018_99_MOESM5_ESM.pdf]

# Fig. S5

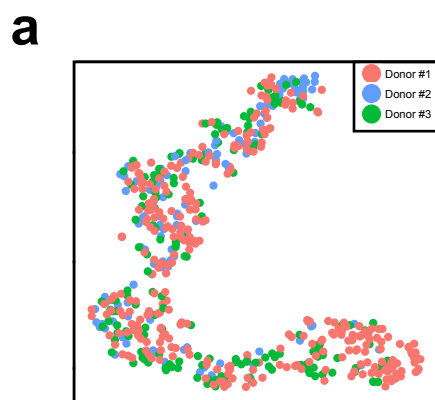

**b**

| State \ Donor | 0       | 1       | 2       | 3       | 4       | Total |
|---------------|---------|---------|---------|---------|---------|-------|
| #1            | 53(18%) | 76(25%) | 58(19%) | 24(8%)  | 88(29%) | 299   |
| #2            | 48(38%) | 41(32%) | 24(19%) | 5(5%)   | 6(6%)   | 128   |
| #3            | 35(21%) | 34(21%) | 39(24%) | 23(14%) | 32(20%) | 163   |
| Total         | 136     | 151     | 121     | 54      | 128     | 590   |

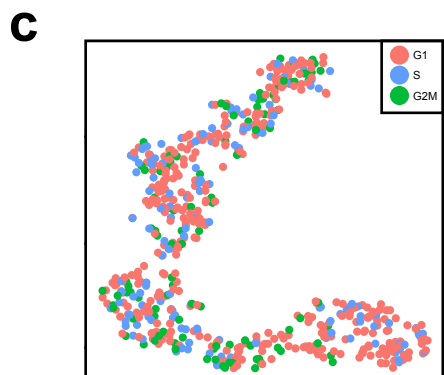

**d**

| Phase \ Donor | G1       | S       | G2/M    | Total |
|---------------|----------|---------|---------|-------|
| #1            | 186(62%) | 76(25%) | 37(12%) | 299   |
| #2            | 68(53%)  | 29(23%) | 31(24%) | 128   |
| #3            | 97(60%)  | 31(19%) | 35(21%) | 163   |
| Total         | 351      | 136     | 103     | 590   |

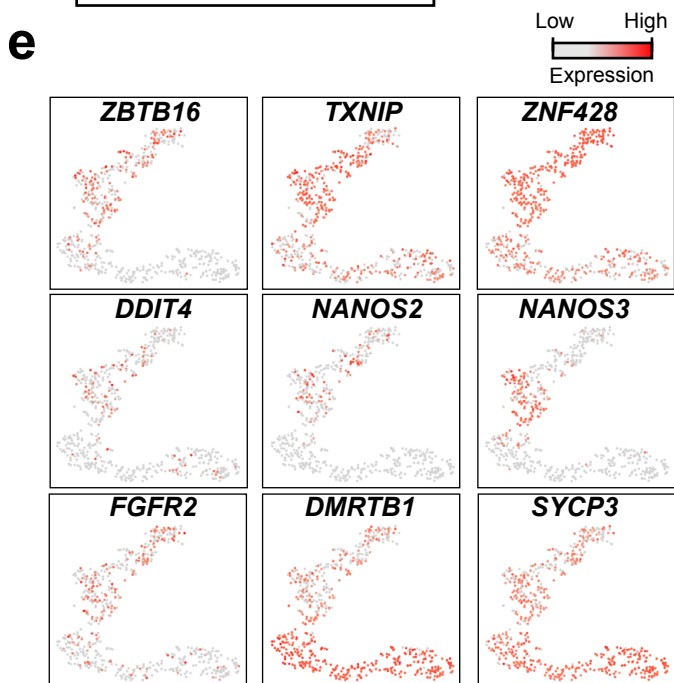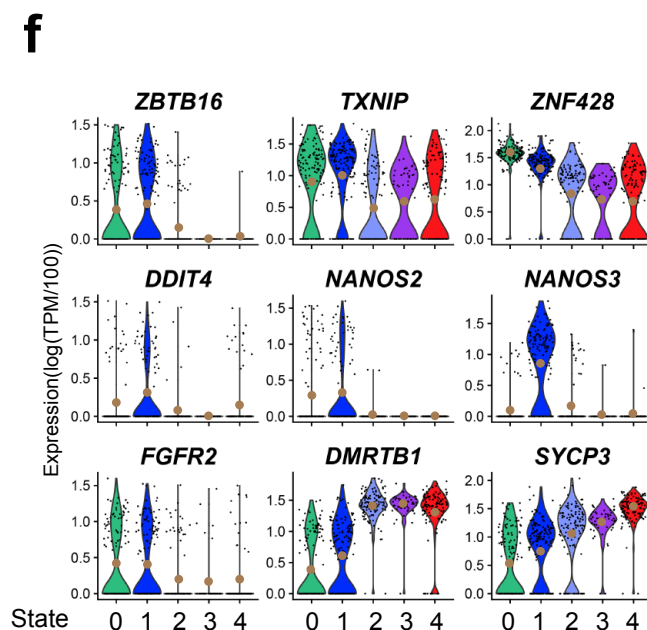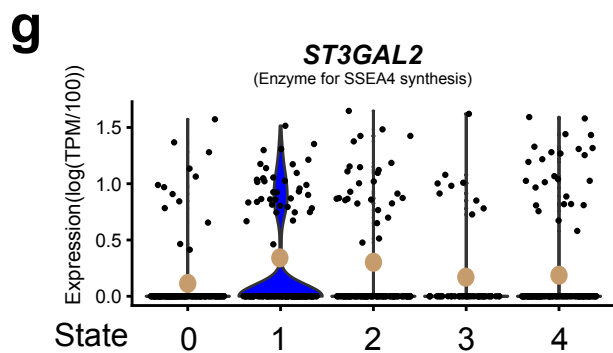

**Fig. S5. Identification of a New SSC State.**

(a) tSNE plot of spermatogonia (Clusters 1 and 2) with cells colored based on their donors of origin.

(b) Decomposition of states by donor of origin.

(c) tSNE plot of spermatogonia (Clusters 1 and 2) with cells colored based on their cell cycle phase.

(d) Decomposition of cell cycle phase by donor of origin.

(e) Cast expression of additional markers for self-renewing or differentiating markers.

(f) Violin plot of markers in Fig. S5e in different states. y-axis shows normalized expression.

(g) *ST3GAL2*, which encodes the enzyme that synthesizes SSEA4 shows higher expression in State 0.
