# Supplementary material for: The adult human testis transcriptional cell atlas
Source: PubMed Central journal article supplement (PMC6274646; doi:10.1038/s41422-018-0099-2), 2018-10-12
Supplement: 41422_2018_99_MOESM6_ESM.pdf [file 41422_2018_99_MOESM6_ESM.pdf]

# Fig. S6

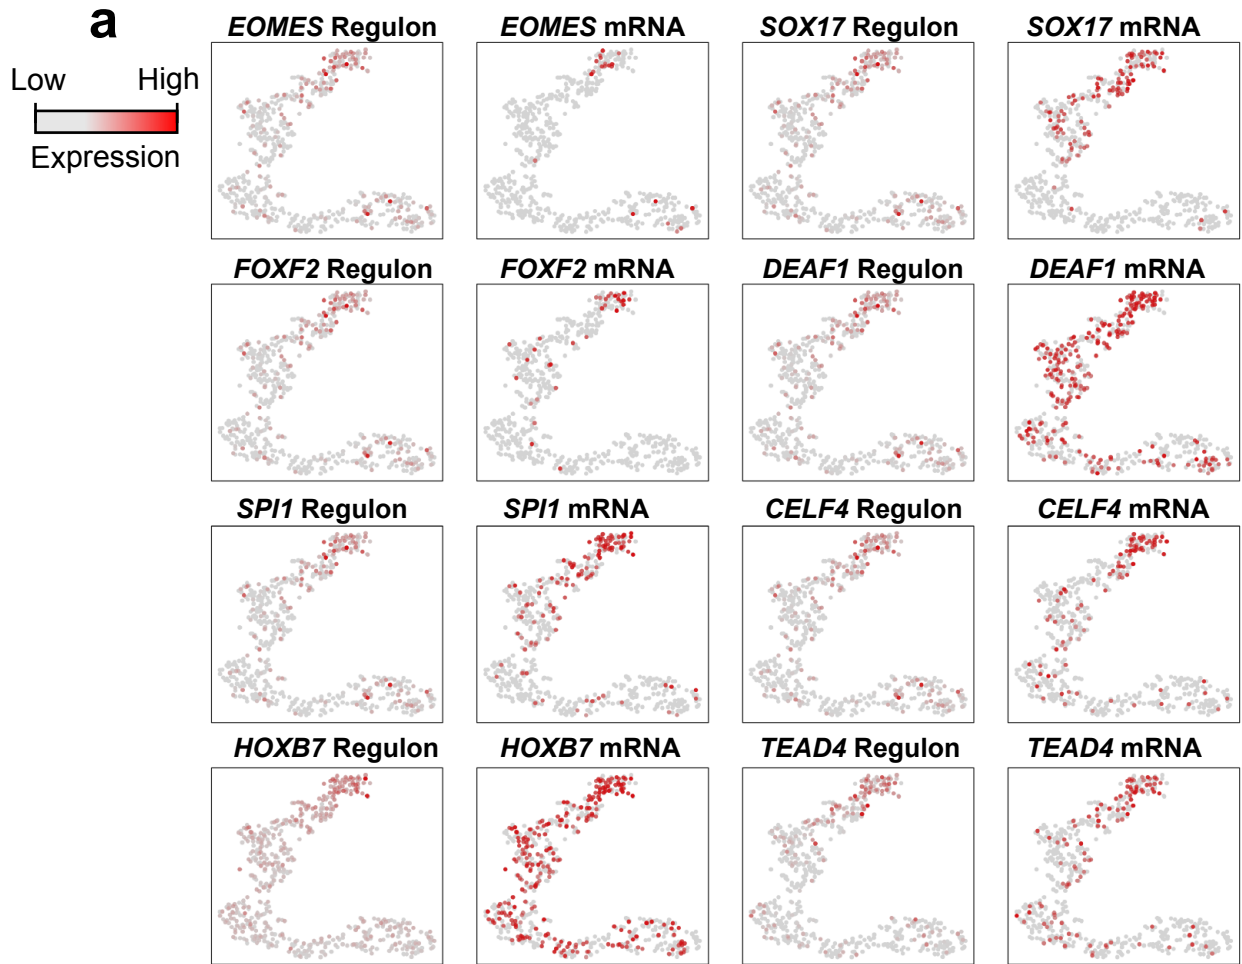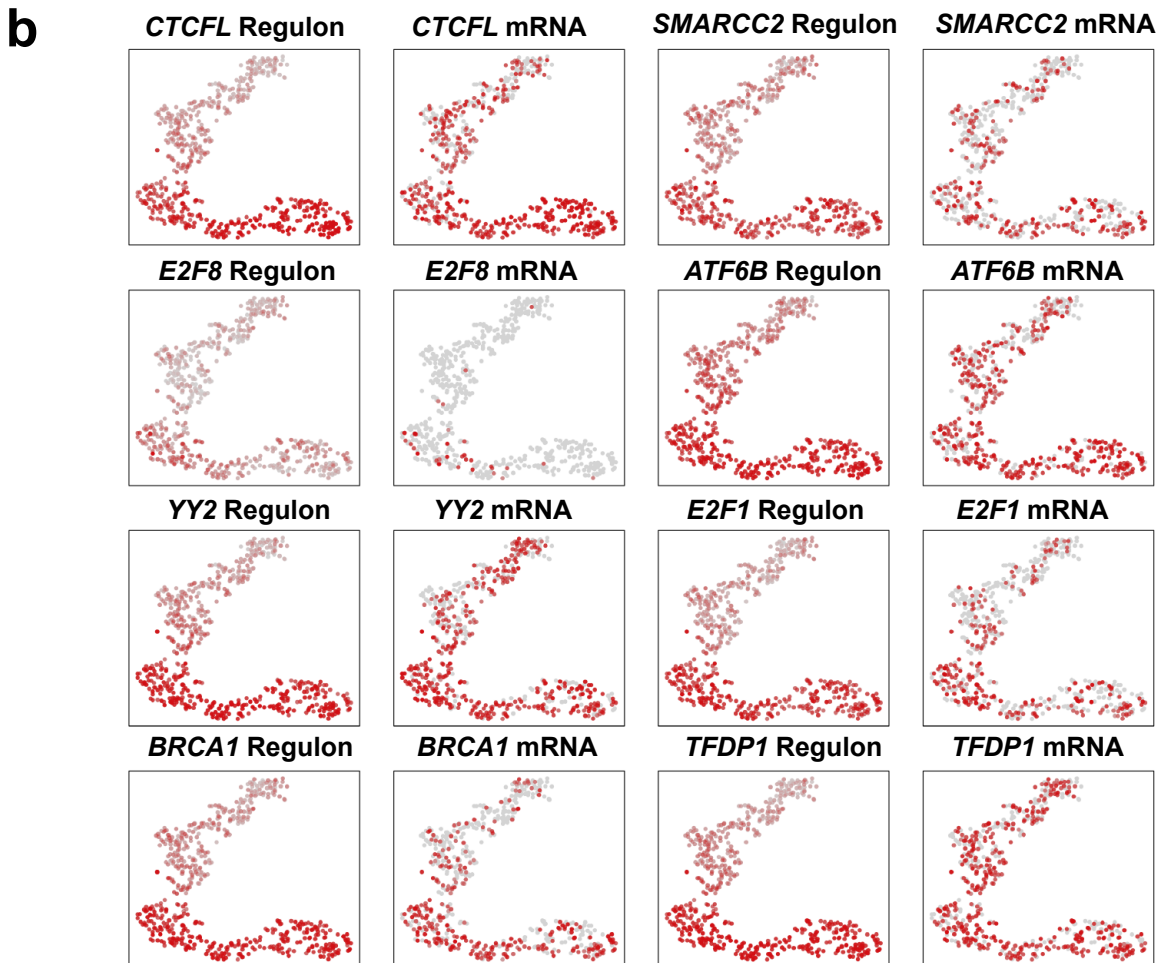

**Fig. S6. Regulon Analysis.**

(a) Cast expression of self-renewing markers based on regulon activity (first and third columns) or mRNA expression (second and fourth columns).

(b) Cast expression of differentiating markers based on regulon activity (first and third columns) or mRNA expression (second and fourth columns).
