# Supplementary material for: The adult human testis transcriptional cell atlas
Source: PubMed Central journal article supplement (PMC6274646; doi:10.1038/s41422-018-0099-2), 2018-10-12
Supplement: 41422_2018_99_MOESM7_ESM.pdf [file 41422_2018_99_MOESM7_ESM.pdf]

**Fig. S7****a**

Combined analysis of infant and adult Leydig cells

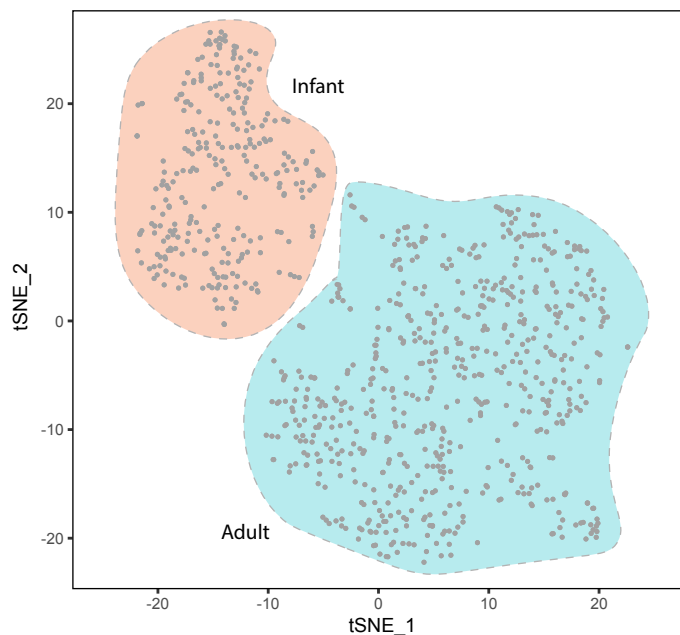**b**

Fetal Leydig markers    Adult Leydig markers

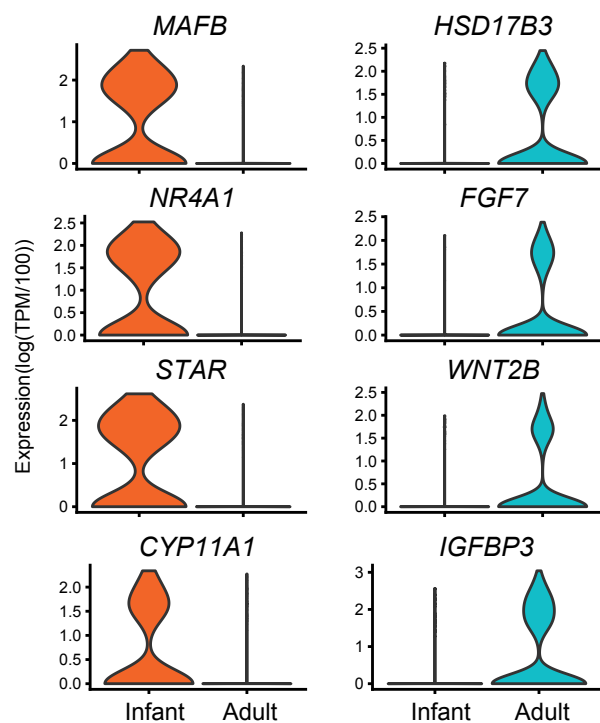**c**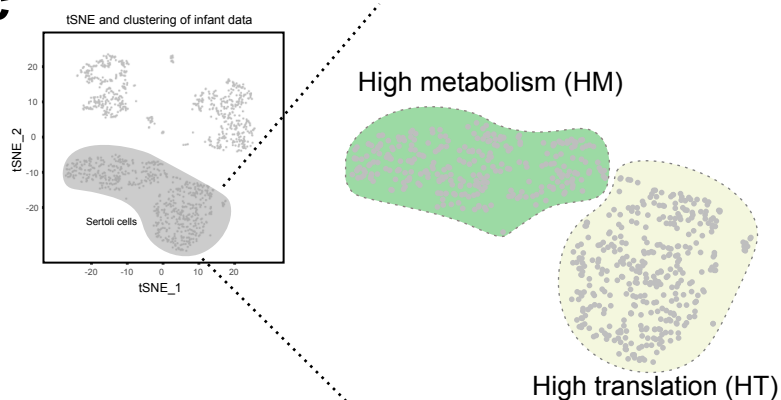**d**

Sertoli cell markers

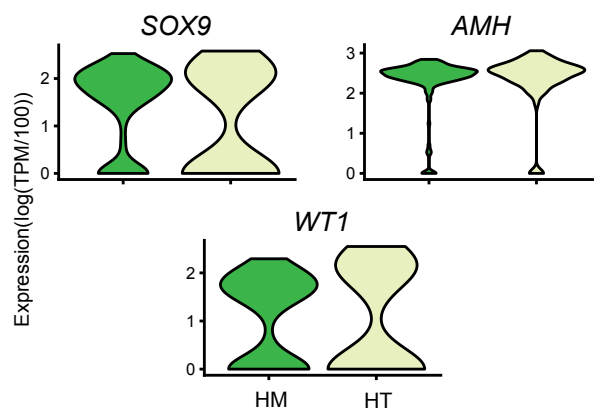**e**

HM markers

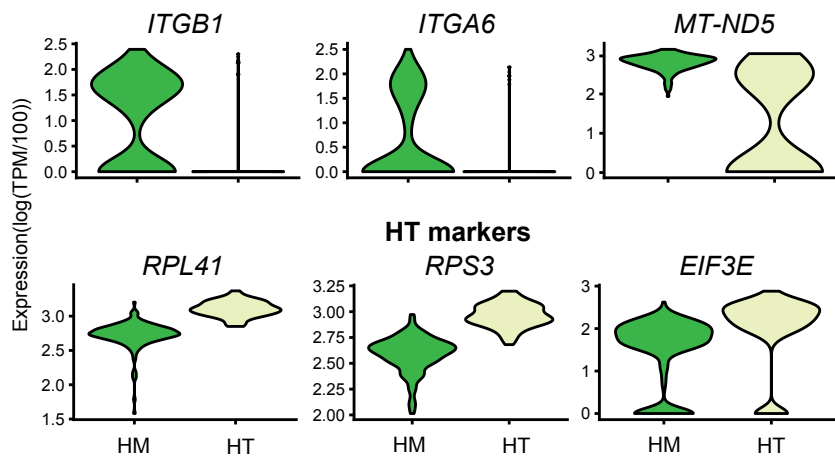**f**

NOTCH signaling pathway

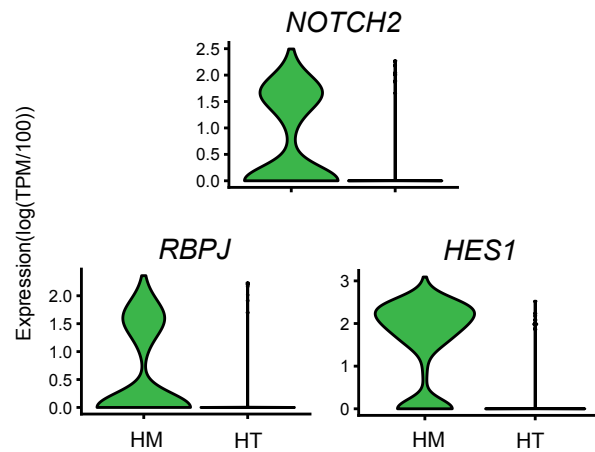

**Fig. S7. Analysis of Infant Somatic Cells.**

(a) tSNE and clustering analysis of infant and adult Leydig cells.

(b) Expression patterns of representative markers in infant and adult Leydig cell clusters in Fig. S7a. Left panel are fetal Leydig cell markers, and right panel are adult Leydig cell markers.

(c) Zoomed-in representation of infant Sertoli cells, which include two distinct clusters (high metabolism and high translation).

(d) Sertoli cell markers are evenly expressed in both Sertoli cell clusters.

(e) Expression of representative genes that are highly expressed in HM or HT Sertoli cells. Top row is HM markers, including different integrins and some mitochondria genes; bottom row is HT markers, including genes that are related to translation.

(f) Notch signaling pathways are active only in HM Sertoli cell clusters.
