# Supplementary material for: The adult human testis transcriptional cell atlas
Source: PubMed Central journal article supplement (PMC6274646; doi:10.1038/s41422-018-0099-2), 2018-10-12
Supplement: 41422_2018_99_MOESM9_ESM.pdf [file 41422_2018_99_MOESM9_ESM.pdf]

Supplementary information, Table S1: Summary of Single-cell Dataset and Clustering Information.

| CellID                     | nGene | nUMI  | Final_clusters |
|----------------------------|-------|-------|----------------|
| Donor2-AAACCTGGTGCCTTGG-1  | 4324  | 11455 | 6              |
| Donor2-AAACCTGTCAACGGGA-1  | 1613  | 10149 | 8              |
| Donor2-AAACCTGTCCTATGTT-1  | 2212  | 11672 | 8              |
| Donor2-AAACCTGTCGGACAAG-1  | 1884  | 9140  | 8              |
| Donor2-AAACGGGAGCTATGCT-1  | 1991  | 7849  | 7              |
| Donor2-AAACGGGGTCTGGAGA-1  | 2094  | 7793  | 6              |
| Donor2-AAACGGGTCTCTAAGG-1  | 2864  | 16431 | 7              |
| Donor2-AAATGCCAGTGTTTGC-1  | 2428  | 8257  | 13             |
| Donor2-AAATGCCGTTAGTGGG-1  | 3147  | 10459 | 11             |
| Donor2-AAATGCCGTTTCGTCTC-1 | 1569  | 5530  | 8              |
| Donor2-AACACGTTCCACTCCA-1  | 5156  | 15884 | 6              |
| Donor2-AACCATGGTAGCTAAA-1  | 2991  | 18074 | 7              |
| Donor2-AACCGCGGTAAATGAC-1  | 6420  | 28397 | 6              |
| Donor2-AACGTTGAGGACACCA-1  | 2449  | 9271  | 9              |
| Donor2-AACTCCCAGGAGCGTT-1  | 2156  | 9099  | 9              |
| Donor2-AACTCCCAGTGATCGG-1  | 1893  | 11301 | 8              |
| Donor2-AACTCCCTCTGTACGA-1  | 1262  | 5587  | 8              |
| Donor2-AACTCTTCAGTTAACC-1  | 5988  | 23018 | 5              |
| Donor2-AACTCTTGTCATATGTC-1 | 2752  | 12092 | 6              |
| Donor2-AACTGGTCATCACAAC-1  | 2049  | 6587  | 13             |
| Donor2-AACTTTCAGACCTTTG-1  | 1873  | 5672  | 11             |
| Donor2-AACTTTCGTGCCTGGT-1  | 1848  | 6664  | 7              |
| Donor2-AACTTTCGTTCCCTTG-1  | 2220  | 8363  | 10             |
| Donor2-AAGCCGCAGCGATTCT-1  | 2978  | 13935 | 10             |
| Donor2-AAGCCGCCATACGCCG-1  | 2023  | 5707  | 11             |
| Donor2-AAGCCGCTCGAATCT-1   | 2744  | 9674  | 6              |
| Donor2-AAGCCGCTCGGCGCTA-1  | 3216  | 12478 | 7              |
| Donor2-AAGGAGCTCGCCTGTT-1  | 2579  | 7375  | 11             |
| Donor2-AAGGCAGGTTGCGTTA-1  | 3884  | 11157 | 3              |
| Donor2-AAGGCAGTCTACTTAC-1  | 2119  | 12746 | 8              |
| Donor2-AAGGTTTCAGCGATTCT-1 | 5815  | 20037 | 1              |
| Donor2-AAGGTTCCACGAAATA-1  | 5525  | 19266 | 3              |
| Donor2-AAGGTTTCGTGGTCCGT-1 | 9081  | 70146 | 6              |
| Donor2-AAGTCTGCAATACGCT-1  | 5116  | 15712 | 6              |
| Donor2-AATCCAGCACTTCTGC-1  | 2418  | 7933  | 6              |
| Donor2-AATCCAGCATCGGAAG-1  | 8141  | 48409 | 5              |
| Donor2-AATCCAGTCTCCCTGA-1  | 7157  | 37640 | 1              |
| Donor2-AATCCAGTCTTCTGGC-1  | 1545  | 5475  | 9              |
| Donor2-AATCGGTAGGGTCTCC-1  | 1769  | 5713  | 13             |
| Donor2-AATCGGTGTAGATTAG-1  | 3093  | 19462 | 7              |
| Donor2-ACACCAACAATGGTCT-1  | 2782  | 6118  | 8              |
| Donor2-ACACCAACACGCATCG-1  | 2073  | 12311 | 8              |
| Donor2-ACACCCTCAGTATCTG-1  | 2201  | 8173  | 9              |
| Donor2-ACACCCTTCAGCTCTC-1  | 2091  | 8157  | 9              |
| Donor2-ACACCGGTCGGTGTTA-1  | 2418  | 14780 | 7              |
| Donor2-ACACTGAAGGCATGTG-1  | 9232  | 57764 | 3              |
| Donor2-ACACTGAAGGTAGCCA-1  | 5510  | 19524 | 6              |
| Donor2-ACACTGACACCTCGTT-1  | 6473  | 26527 | 5              |
| Donor2-ACACTGATCTTCTGGC-1  | 1845  | 6337  | 9              |
| Donor2-ACAGCTAAGACAAAGG-1  | 4969  | 19823 | 6              |
| Donor2-ACAGCTAGTTTGCATG-1  | 2209  | 13313 | 7              |
| Donor2-ACATCAGGTAAAGGAG-1  | 3111  | 6701  | 1              |
| Donor2-ACATCAGGTCAAATC-1   | 4917  | 15474 | 5              |
| Donor2-ACATCAGGTTAAGATG-1  | 2938  | 8546  | 11             |

|                            |      |       |    |
|----------------------------|------|-------|----|
| Donor2-ACATCAGGTTTCGTGAT-1 | 3207 | 10577 | 11 |
| Donor2-ACATGGTAGCAGATCG-1  | 5246 | 16359 | 5  |
| Donor2-ACATGGTGTGGGTCAA-1  | 2727 | 15510 | 7  |
| Donor2-ACCAGTAAGATAGCAT-1  | 3623 | 12766 | 11 |
| Donor2-ACCAGTAAGCTAACAA-1  | 5231 | 15382 | 3  |
| Donor2-ACCAGTAAGTGTCCAT-1  | 6015 | 30589 | 6  |
| Donor2-ACCAGTAGTGTCTGAT-1  | 2376 | 5699  | 8  |
| Donor2-ACCCACTAGACCACGA-1  | 7690 | 44124 | 6  |
| Donor2-ACCGTAAAGATAGGAG-1  | 1861 | 7529  | 7  |
| Donor2-ACCGTAAAGGGTTCCC-1  | 1649 | 9052  | 8  |
| Donor2-ACCGTAATCCAAACTG-1  | 4506 | 12183 | 6  |
| Donor2-ACCGTAATCTAACTTC-1  | 7217 | 33176 | 6  |
| Donor2-ACCTTTATCGGAAATA-1  | 2220 | 5967  | 11 |
| Donor2-ACGAGCCGTGCATCTA-1  | 2230 | 9596  | 9  |
| Donor2-ACGAGGAAGAAGAAGC-1  | 2558 | 10584 | 7  |
| Donor2-ACGAGGAAGCTCAACT-1  | 1947 | 8009  | 13 |
| Donor2-ACGAGGACAGCCTTTC-1  | 3290 | 17397 | 7  |
| Donor2-ACGAGGACAGTCAGAG-1  | 2982 | 9968  | 6  |
| Donor2-ACGAGGACAGTCGATT-1  | 2750 | 13498 | 6  |
| Donor2-ACGAGGACATCCCATC-1  | 2784 | 10200 | 13 |
| Donor2-ACGAGGAGTCGACTGC-1  | 4554 | 12487 | 5  |
| Donor2-ACGAGGATCCGCATAA-1  | 6137 | 26017 | 5  |
| Donor2-ACGATACAGCCAGTTT-1  | 1654 | 7153  | 7  |
| Donor2-ACGATACAGGACACCA-1  | 4057 | 20929 | 6  |
| Donor2-ACGATACTCAAACCGT-1  | 1872 | 8484  | 7  |
| Donor2-ACGATGTAGCTAAACA-1  | 2856 | 11740 | 10 |
| Donor2-ACGATGTCAAGTTCTG-1  | 3772 | 17158 | 9  |
| Donor2-ACGCCAGTCTGAAAGA-1  | 3923 | 11199 | 5  |
| Donor2-ACGCCGAAGCTAACAA-1  | 5388 | 23181 | 6  |
| Donor2-ACGCCGAGTGATGATA-1  | 4037 | 23340 | 6  |
| Donor2-ACGCCGAGTTACCAGT-1  | 1586 | 5519  | 7  |
| Donor2-ACGCCGATCTTATCTG-1  | 7795 | 44545 | 6  |
| Donor2-ACGGAGACAACGATGG-1  | 4190 | 23869 | 7  |
| Donor2-ACGGAGAGTGTCTGAT-1  | 5169 | 15777 | 6  |
| Donor2-ACGGCCATCCATGAGT-1  | 3014 | 6877  | 3  |
| Donor2-ACGGCCATCCCAGGTG-1  | 4371 | 17730 | 6  |
| Donor2-ACGGGCTAGTGGACGT-1  | 2609 | 11076 | 10 |
| Donor2-ACGGGCTGTTCTGGTA-1  | 2081 | 10815 | 7  |
| Donor2-ACGGGCTTCGATCCCT-1  | 2816 | 8080  | 5  |
| Donor2-ACGGGCTTCTTACCTA-1  | 2511 | 13187 | 7  |
| Donor2-ACGGGTCAGTGCAAGC-1  | 3548 | 9042  | 4  |
| Donor2-ACGTCAACAACACCCG-1  | 1450 | 5859  | 13 |
| Donor2-ACTATCTGTTATGTGC-1  | 2046 | 6331  | 11 |
| Donor2-ACTGAACCATGCCACG-1  | 1756 | 7473  | 7  |
| Donor2-ACTGAACTCACTCCTG-1  | 8734 | 64301 | 6  |
| Donor2-ACTGAACTCGTTTAGG-1  | 4484 | 11962 | 6  |
| Donor2-ACTGAGTTCAGTACGT-1  | 7743 | 42267 | 6  |
| Donor2-ACTGAGTTCCAGAGGA-1  | 1266 | 6202  | 8  |
| Donor2-ACTGAGTTCTCTGAGA-1  | 5681 | 30322 | 6  |
| Donor2-ACTGATGAGTACACCT-1  | 3566 | 26645 | 7  |
| Donor2-ACTGCTCTCGTCTGCT-1  | 6311 | 34957 | 4  |
| Donor2-ACTGCTCTCTTTAGGG-1  | 4270 | 12483 | 4  |
| Donor2-ACTGTCCAGAGTAATC-1  | 2693 | 11815 | 8  |
| Donor2-ACTGTCCAGCGTGAGT-1  | 1715 | 7809  | 8  |
| Donor2-ACTGTCCCAAGCCAC-1   | 1371 | 6365  | 8  |
| Donor2-ACTGTCCGTTTCGGCAC-1 | 6701 | 31637 | 5  |

|                            |      |       |    |
|----------------------------|------|-------|----|
| Donor2-ACTGTCCTCTTCCTTC-1  | 6326 | 23557 | 3  |
| Donor2-ACTTACTGTGCGGTAA-1  | 1847 | 9218  | 8  |
| Donor2-ACTTGTTAGGATGCGT-1  | 2309 | 6924  | 11 |
| Donor2-ACTTGTTGTTCGGCACT-1 | 1754 | 7316  | 7  |
| Donor2-ACTTTCCACAATCCAAC-1 | 4104 | 16110 | 8  |
| Donor2-ACTTTCCACATCGGGTC-1 | 1479 | 6439  | 8  |
| Donor2-ACTTTTCATCCGTACAA-1 | 6355 | 34537 | 5  |
| Donor2-AGAATAGAGCCAGTTT-1  | 3389 | 13940 | 6  |
| Donor2-AGAATAGTCAAAGTAG-1  | 1441 | 7834  | 8  |
| Donor2-AGACGTTTCAGCCTTGG-1 | 3594 | 12085 | 11 |
| Donor2-AGACGTTTCAGGTCCAC-1 | 3823 | 26454 | 8  |
| Donor2-AGACGTTTCAGGCCCA-1  | 2237 | 11930 | 7  |
| Donor2-AGACGTTTCGATCCCT-1  | 2201 | 8645  | 7  |
| Donor2-AGAGCGAAGATGGGTC-1  | 6003 | 30982 | 1  |
| Donor2-AGAGCGAAGCTGTTCA-1  | 3416 | 17836 | 7  |
| Donor2-AGAGCGAAGTATGACA-1  | 2111 | 5835  | 11 |
| Donor2-AGAGTGGAGAGGTTGC-1  | 4693 | 18024 | 6  |
| Donor2-AGAGTGGAGTGCGATG-1  | 2975 | 10759 | 10 |
| Donor2-AGATCTGAGCCCAGCT-1  | 5596 | 23044 | 5  |
| Donor2-AGATCTGCAGCAGTTT-1  | 6239 | 41091 | 6  |
| Donor2-AGATCTGGTTCACGGC-1  | 1855 | 5550  | 13 |
| Donor2-AGATTGCAGGAGTACC-1  | 2649 | 5845  | 3  |
| Donor2-AGATTGCAGGAGTTTA-1  | 3445 | 8826  | 3  |
| Donor2-AGATTGCCACCGAATT-1  | 2327 | 6463  | 11 |
| Donor2-AGATTGCTCATGCTCC-1  | 3269 | 7164  | 5  |
| Donor2-AGATTGCTCCGTACAA-1  | 2075 | 12072 | 8  |
| Donor2-AGCAGCCCAAAGCAAT-1  | 2526 | 7214  | 11 |
| Donor2-AGCATAACAGACGCACA-1 | 8550 | 55474 | 5  |
| Donor2-AGCATAACCACCTATCC-1 | 5416 | 28518 | 6  |
| Donor2-AGCATACTCTAAGCCA-1  | 4888 | 13839 | 6  |
| Donor2-AGCCTAAAGTTCCACA-1  | 2890 | 9636  | 11 |
| Donor2-AGCCTAACAAATAGCGG-1 | 3052 | 16640 | 7  |
| Donor2-AGCGGTCAGAAACGAG-1  | 3009 | 12801 | 10 |
| Donor2-AGCGTATCAAGCCCAC-1  | 2806 | 8357  | 13 |
| Donor2-AGCGTATGTTTGTTC-1   | 1712 | 6697  | 13 |
| Donor2-AGCGTCGAGTGACATA-1  | 2202 | 5453  | 13 |
| Donor2-AGCGTCGCATCACCT-1   | 6607 | 34489 | 6  |
| Donor2-AGCGTCGGTAGGACAC-1  | 4201 | 11976 | 5  |
| Donor2-AGCGTCGTCTGGCGAC-1  | 6331 | 35076 | 5  |
| Donor2-AGCTCCTCACTTAACG-1  | 3705 | 28889 | 7  |
| Donor2-AGCTCTCTCGCGGATC-1  | 2912 | 5757  | 6  |
| Donor2-AGCTCTCTTACGAGT-1   | 3716 | 20130 | 6  |
| Donor2-AGCTTGAAGTTACCCA-1  | 3086 | 22830 | 8  |
| Donor2-AGGGAGTCAGTGAGTG-1  | 5277 | 16217 | 8  |
| Donor2-AGGGAGTGTAGAGGAA-1  | 2056 | 8783  | 7  |
| Donor2-AGGGATGCAAACCCAT-1  | 3165 | 10549 | 6  |
| Donor2-AGGGATGCACGGCTAC-1  | 5868 | 21797 | 6  |
| Donor2-AGGGATGGTTCGTGAT-1  | 1770 | 6174  | 13 |
| Donor2-AGGGTGATCTACTCAT-1  | 7007 | 48986 | 4  |
| Donor2-AGGGTGATCTGTCTCG-1  | 4370 | 13646 | 6  |
| Donor2-AGGTCATAGTACTTGC-1  | 1274 | 6529  | 8  |
| Donor2-AGGTCATGTGAGGGAG-1  | 2277 | 7958  | 10 |
| Donor2-AGGTCATTCTCGAGTA-1  | 2127 | 7968  | 13 |
| Donor2-AGTAGTCAGACGCAAC-1  | 5552 | 23191 | 5  |
| Donor2-AGTAGTCAGCAGCCTC-1  | 2355 | 14845 | 8  |
| Donor2-AGTAGTCCATCGGACC-1  | 6294 | 24951 | 5  |

|                            |      |       |    |
|----------------------------|------|-------|----|
| Donor2-AGTAGTCTCCAAACAC-1  | 8765 | 61974 | 6  |
| Donor2-AGTCTTTAGGCCCGTT-1  | 6098 | 45397 | 10 |
| Donor2-AGTCTTTAGTCCATAC-1  | 7008 | 56303 | 6  |
| Donor2-AGTCTTTCAGAGTGTG-1  | 6040 | 45392 | 10 |
| Donor2-AGTCTTTCAGCTCCGA-1  | 2051 | 7503  | 9  |
| Donor2-AGTCTTTTCCCACTTG-1  | 5771 | 43485 | 6  |
| Donor2-AGTGAGGAGTACGTAA-1  | 2300 | 9683  | 7  |
| Donor2-AGTGAGGCAGCTGTGC-1  | 6725 | 51062 | 6  |
| Donor2-AGTGGGAAGACACGAC-1  | 5665 | 26943 | 6  |
| Donor2-AGTGGGATCGCAAGCC-1  | 2755 | 8236  | 11 |
| Donor2-AGTGTCAGTGAGTATA-1  | 2517 | 12579 | 7  |
| Donor2-AGTTGGTAGTATCTCG-1  | 1553 | 5555  | 13 |
| Donor2-ATAACGCAGGTAGCCA-1  | 4212 | 28522 | 7  |
| Donor2-ATAACGCTCACGATGT-1  | 5674 | 55918 | 7  |
| Donor2-ATAACGCTCTACCAGA-1  | 1977 | 10019 | 8  |
| Donor2-ATAAGAGAGCGGATCA-1  | 6759 | 44010 | 6  |
| Donor2-ATAAGAGGTAAATGAC-1  | 3168 | 17716 | 7  |
| Donor2-ATAGACCAGGTACTCT-1  | 1503 | 5405  | 13 |
| Donor2-ATAGACCCAAGCCATT-1  | 4536 | 12292 | 2  |
| Donor2-ATAGACCCAATTCCTT-1  | 4035 | 9589  | 2  |
| Donor2-ATCATCTAGTAGGTGC-1  | 1564 | 5823  | 7  |
| Donor2-ATCATCTGTGCTAGCC-1  | 3475 | 8224  | 3  |
| Donor2-ATCATGGTCACAATGC-1  | 4179 | 17603 | 8  |
| Donor2-ATCCACCGTCGAACAG-1  | 2530 | 5561  | 5  |
| Donor2-ATCCACCTCTTCAACT-1  | 1837 | 7489  | 9  |
| Donor2-ATCCGAAAGTACACCT-1  | 7457 | 42029 | 5  |
| Donor2-ATCCGAATCCACGTGG-1  | 4156 | 18847 | 6  |
| Donor2-ATCGAGTAGAAACCTA-1  | 2768 | 11147 | 8  |
| Donor2-ATCTACTCAGCTGTTA-1  | 5535 | 21179 | 1  |
| Donor2-ATCTACTCAGTATCTG-1  | 6538 | 29045 | 6  |
| Donor2-ATCTGCCAGATACACA-1  | 9679 | 83399 | 6  |
| Donor2-ATCTGCCCAAAGTGCG-1  | 7638 | 41381 | 5  |
| Donor2-ATCTGCCACGTGAGA-1   | 2344 | 7937  | 10 |
| Donor2-ATCTGCCAGCTGGCT-1   | 1904 | 11063 | 8  |
| Donor2-ATGAGGGCAAAGGCGT-1  | 1806 | 6304  | 9  |
| Donor2-ATGAGGGTAACGTTC-1   | 3600 | 14020 | 7  |
| Donor2-ATGCGATCATGGTCTA-1  | 4723 | 42853 | 7  |
| Donor2-ATGTGTGAGTGTTGAA-1  | 2299 | 8916  | 6  |
| Donor2-ATTATCCGTTTGCATG-1  | 3896 | 23642 | 6  |
| Donor2-ATTATCCTCAAGGTAA-1  | 6851 | 30420 | 5  |
| Donor2-ATTCTACCAAGGACAC-1  | 3066 | 15813 | 7  |
| Donor2-ATTGGACGTATAGGGC-1  | 2988 | 9677  | 11 |
| Donor2-ATTGGTGTCAAGGCTT-1  | 1479 | 6650  | 8  |
| Donor2-ATTTCTGCAATGTAAG-1  | 1905 | 6467  | 7  |
| Donor2-ATTTCTGCATCGATTG-1  | 5360 | 19307 | 4  |
| Donor2-ATTTCTGGTGTTCCTTT-1 | 1535 | 8964  | 8  |
| Donor2-CAACTAGAGAGGTACC-1  | 7450 | 35360 | 6  |
| Donor2-CAAGAAACAGCTTAAC-1  | 4652 | 13591 | 5  |
| Donor2-CAAGAAATCCCATTAT-1  | 3263 | 7818  | 6  |
| Donor2-CAAGAAATCGATCCCT-1  | 2586 | 8229  | 13 |
| Donor2-CAAGAAATCTAACTCT-1  | 3049 | 6331  | 2  |
| Donor2-CAAGATCAGATAGTCA-1  | 3422 | 12733 | 5  |
| Donor2-CAAGATCCATACTACG-1  | 3921 | 15525 | 8  |
| Donor2-CAAGATCCATATGCTG-1  | 2100 | 6149  | 11 |
| Donor2-CAAGGCCAGTCACTA-1   | 4745 | 24485 | 6  |
| Donor2-CAAGTTGAGAACTCGG-1  | 7112 | 35866 | 5  |

|                              |      |       |    |
|------------------------------|------|-------|----|
| Donor2-CACAAACAGACTGTAA-1    | 9090 | 52641 | 6  |
| Donor2-CACACAAAGCAGATCG-1    | 2196 | 5538  | 11 |
| Donor2-CACACAAGTACAGACG-1    | 3902 | 19604 | 10 |
| Donor2-CACACAAGTGGGTCAA-1    | 5424 | 14679 | 6  |
| Donor2-CACACCTAGATGTAAC-1    | 3172 | 10652 | 11 |
| Donor2-CACACCTAGATGTGTA-1    | 2664 | 11767 | 12 |
| Donor2-CACACCTCAAGGTTTC-1    | 1274 | 7010  | 8  |
| Donor2-CACAGGCTCCAAAGTC-1    | 4356 | 18310 | 7  |
| Donor2-CACAGGCTCCACGCAG-1    | 1687 | 5871  | 9  |
| Donor2-CACAGGCTCTAACTTC-1    | 5036 | 15564 | 6  |
| Donor2-CACAGTAAGTCGTACTION-1 | 1692 | 7407  | 8  |
| Donor2-CACAGTAGTTCAGACT-1    | 2435 | 17896 | 8  |
| Donor2-CACAGTATCCCGACTT-1    | 1340 | 5499  | 8  |
| Donor2-CACAGTATCGAGCCCA-1    | 3914 | 13209 | 6  |
| Donor2-CACATAGCATACTCTT-1    | 2093 | 7239  | 13 |
| Donor2-CACATAGGTTATGTGC-1    | 3350 | 9786  | 2  |
| Donor2-CACATAGTCGGTTAAC-1    | 5390 | 19452 | 4  |
| Donor2-CACATTTAGCGATCCC-1    | 3148 | 7838  | 6  |
| Donor2-CACCAGGAGGTTACCT-1    | 1429 | 7180  | 8  |
| Donor2-CACCAGGCATGAGCGA-1    | 6567 | 47216 | 5  |
| Donor2-CACCTTGCATCCCACT-1    | 4277 | 12694 | 5  |
| Donor2-CACTCCATCATGCAAC-1    | 1781 | 6386  | 8  |
| Donor2-CAGAATCAGACAGAGA-1    | 2007 | 7856  | 9  |
| Donor2-CAGAATCAGCGGATCA-1    | 2729 | 12139 | 7  |
| Donor2-CAGAATCAGTGGACGT-1    | 1335 | 5643  | 7  |
| Donor2-CAGAATCAGTGGTCCC-1    | 2508 | 7210  | 11 |
| Donor2-CAGAATCGTGAAAGAG-1    | 1788 | 6630  | 13 |
| Donor2-CAGAGAGGTAAATACG-1    | 1671 | 6036  | 13 |
| Donor2-CAGAGAGGTCTTGATG-1    | 4475 | 11945 | 6  |
| Donor2-CAGATCAAGGGTCGAT-1    | 2425 | 8194  | 13 |
| Donor2-CAGATCACACAACACTGT-1  | 1762 | 5776  | 13 |
| Donor2-CAGATCAGTCAGAAGC-1    | 2067 | 7087  | 10 |
| Donor2-CAGATCATCCGTACAA-1    | 1677 | 9199  | 8  |
| Donor2-CAGCAGCTCACAGTAC-1    | 3775 | 9516  | 3  |
| Donor2-CAGCATAGTCGAAAGC-1    | 2292 | 9167  | 6  |
| Donor2-CAGCATAGTCGCTTTC-1    | 1200 | 5940  | 8  |
| Donor2-CAGCCGAAGAATAGGG-1    | 5640 | 50498 | 7  |
| Donor2-CAGCCGAAGAATTCCC-1    | 2141 | 7718  | 13 |
| Donor2-CAGCCGAAGCCTATGT-1    | 1721 | 5761  | 9  |
| Donor2-CAGCCGAAGGCTAGCA-1    | 1757 | 9420  | 8  |
| Donor2-CAGCCGAGTCACTGGC-1    | 3480 | 10097 | 5  |
| Donor2-CAGCCGAGTCGTCTTC-1    | 3575 | 19767 | 6  |
| Donor2-CAGCCGAGTTCACGG-1     | 4344 | 15473 | 6  |
| Donor2-CAGCGACAGACGACGT-1    | 2460 | 11323 | 10 |
| Donor2-CAGCGACGTGTTGGGA-1    | 2825 | 12727 | 7  |
| Donor2-CAGCTAAAGATGCCAG-1    | 1884 | 6238  | 10 |
| Donor2-CAGCTGGGTATAGTAG-1    | 6692 | 41305 | 6  |
| Donor2-CAGCTGGTCACAAACC-1    | 7169 | 29210 | 4  |
| Donor2-CAGGTGCCAATCCAAC-1    | 5445 | 18813 | 5  |
| Donor2-CAGGTGCCAGACACTT-1    | 1842 | 5667  | 13 |
| Donor2-CAGGTGCTCAACGGGA-1    | 1897 | 6437  | 13 |
| Donor2-CAGTAACGTACAAGTA-1    | 1757 | 10230 | 8  |
| Donor2-CAGTAACGTAGGGACT-1    | 1919 | 7193  | 9  |
| Donor2-CAGTAACGTCAACATC-1    | 1904 | 6527  | 10 |
| Donor2-CAGTCCTAGAGTAAGG-1    | 2300 | 10595 | 7  |
| Donor2-CAGTCCTCAGTGTTG-1     | 6773 | 44777 | 5  |

Donor2-CATATGGCAATGGAGC-1 1575 7299 8  
Donor2-CATATTCAGACCGGAT-1 5978 30805 6  
Donor2-CATATTCTCAACGAAA-1 3148 12861 10  
Donor2-CATATTCTCGGCGCAT-1 5981 26200 6  
Donor2-CATCAAGCAAGTCTAC-1 1782 6431 9  
Donor2-CATCAAGTCGTACCGG-1 1773 8592 7  
Donor2-CATCAAGTCTGGTGTA-1 5476 18462 6  
Donor2-CATCAGAAGTACGATA-1 1244 6242 8  
Donor2-CATCAGACACAGATTC-1 6889 37462 5  
Donor2-CATCAGAGTTACTGAC-1 2700 7849 11  
Donor2-CATCAGAGTTTAAGCC-1 2780 10125 7  
Donor2-CATCCACAGACGACGT-1 1713 6213 13  
Donor2-CATCCACAGGTGCTAG-1 2699 8002 4  
Donor2-CATCCACTCGGTCCGA-1 1719 6676 9  
Donor2-CATCGGGCAACTGCTA-1 6117 23556 5  
Donor2-CATCGGGTCTTGTATC-1 2914 6665 6  
Donor2-CATGCCTGTATAAACG-1 2067 7496 13  
Donor2-CATGGCGCACGGCGTT-1 2318 6548 11  
Donor2-CATGGCGCATCTCGCT-1 2871 12357 7  
Donor2-CATGGCGGTACCGCTG-1 2015 8346 7  
Donor2-CATTATCAGAGTCTGG-1 2164 8961 6  
Donor2-CATTATCAGCAGGTCA-1 4400 12258 4  
Donor2-CATTTCGCCAAGTCTAC-1 1868 6792 10  
Donor2-CATTTCGCGTTTCGTCTC-1 4115 10225 3  
Donor2-CATTTCGCTCACTTACT-1 3032 27139 8  
Donor2-CCAATCCAGCAGATCG-1 5480 17671 1  
Donor2-CCAATCCAGTGGGTTG-1 5265 18550 1  
Donor2-CCAATCCCATACGCCG-1 3185 10879 11  
Donor2-CCAATCCGTCCATGAT-1 6153 24637 6  
Donor2-CCAATCCTCGGAAATA-1 5853 23294 4  
Donor2-CCACCTAAGAACAATC-1 7372 61223 6  
Donor2-CCACCTAAGTAAGTAC-1 1395 6226 8  
Donor2-CCACCTACAATCTGCA-1 4658 27810 6  
Donor2-CCACCTAGTTACTGAC-1 9424 84458 4  
Donor2-CCACGGACAATTGCTG-1 1953 5653 11  
Donor2-CCACTACAGTTGTCGT-1 1852 7246 13  
Donor2-CCACTACCACGGTTTA-1 2421 11290 7  
Donor2-CCACTACTCTTGCAAG-1 2091 7094 13  
Donor2-CCATTCGCAGACAAGC-1 4309 17493 6  
Donor2-CCATTCGGTACTCTCC-1 6930 48656 4  
Donor2-CCATTCGGTCTTTCAT-1 1946 7134 9  
Donor2-CCATTCGTCCGAACGC-1 3331 7748 3  
Donor2-CCCAATCAGTTCGATC-1 1816 6354 9  
Donor2-CCCAATCCACATCAA-1 3260 10079 11  
Donor2-CCCAATCTCAGGTTCA-1 1567 5508 13  
Donor2-CCCAGTTCATATACGC-1 1334 7025 8  
Donor2-CCCAGTTGTGCAACGA-1 1506 7136 8  
Donor2-CCCAGTTGTGCGCTTG-1 5582 20379 5  
Donor2-CCCATACAGGTTACCT-1 2018 10173 8  
Donor2-CCCATACGTACGCACC-1 2374 10137 7  
Donor2-CCCTCCTAGCTATGCT-1 3028 6259 8  
Donor2-CCCTCCTCATATACGC-1 2368 11228 7  
Donor2-CCCTCCTGTACTTGAC-1 2875 10657 7  
Donor2-CCCTCCTTCAGCTCGG-1 2196 7783 13  
Donor2-CCGGGATCAGGGCATA-1 2872 13409 7  
Donor2-CCGGGATGTAGCCTCG-1 1630 7908 8

|                            |      |       |    |
|----------------------------|------|-------|----|
| Donor2-CCGGGATGTTTCCACC-1  | 2636 | 7786  | 11 |
| Donor2-CCGGTAGCAGAGCCAA-1  | 1534 | 6075  | 8  |
| Donor2-CCGGTAGCAGATGGGT-1  | 2178 | 12346 | 7  |
| Donor2-CCGTACTAGCACAGGT-1  | 7848 | 41176 | 6  |
| Donor2-CCGTACTGTAACGCGA-1  | 6608 | 24792 | 5  |
| Donor2-CCGTACTGTTCAACCA-1  | 2591 | 7648  | 11 |
| Donor2-CCGTACTTCAATCACG-1  | 1613 | 5674  | 7  |
| Donor2-CCGTGGAAGTCATCCA-1  | 1738 | 9543  | 8  |
| Donor2-CCGTGGAGTGTGTGCC-1  | 2241 | 8838  | 7  |
| Donor2-CCGTTCAAGGAATTAC-1  | 5186 | 20084 | 6  |
| Donor2-CCGTTCAAGGCGCTCT-1  | 2157 | 6009  | 11 |
| Donor2-CCGTTCAAGGCTCAGA-1  | 4328 | 20950 | 7  |
| Donor2-CCGTTCAAGGGAGTAA-1  | 5377 | 23851 | 5  |
| Donor2-CCGTTACATCCTTGC-1   | 6733 | 31192 | 6  |
| Donor2-CCTAGCTAGAATTCCC-1  | 4071 | 10701 | 4  |
| Donor2-CCTAGCTGTGGCAAAC-1  | 1506 | 7375  | 8  |
| Donor2-CCTAGCTGTTTGCATG-1  | 2272 | 13768 | 8  |
| Donor2-CCTAGCTTCACTTCAT-1  | 5256 | 26311 | 6  |
| Donor2-CCTATTACACGGCGTT-1  | 1628 | 5780  | 9  |
| Donor2-CCTATTAGTAGTAGTA-1  | 2492 | 9494  | 10 |
| Donor2-CCTCAGTGTGATGTGG-1  | 8442 | 72362 | 4  |
| Donor2-CCTCTGAGTGCACTTA-1  | 3698 | 16468 | 7  |
| Donor2-CCTTACGCACGGTTTA-1  | 3185 | 10339 | 11 |
| Donor2-CCTTACGGTCCAAGTT-1  | 5392 | 17163 | 1  |
| Donor2-CCTTACGGTTAAGTAG-1  | 4096 | 14727 | 6  |
| Donor2-CCTTACGGTTATGTGC-1  | 4735 | 14280 | 5  |
| Donor2-CCTTCGATCTAGCACA-1  | 1695 | 5985  | 8  |
| Donor2-CCTTTCTCACTGAAGG-1  | 3829 | 9691  | 3  |
| Donor2-CCTTTCTGTCTGGAGA-1  | 1981 | 10360 | 8  |
| Donor2-CCTTTCTGTTGCTCCT-1  | 4903 | 14854 | 6  |
| Donor2-CCTTTCTTCCTGTAGA-1  | 4987 | 23720 | 6  |
| Donor2-CGAACATCACCCATC-1   | 4605 | 12545 | 2  |
| Donor2-CGAACATCATCCGTGG-1  | 1330 | 5553  | 13 |
| Donor2-CGAATGTAGAGACTTA-1  | 2677 | 6743  | 2  |
| Donor2-CGAATGTAGGGTGTTG-1  | 4630 | 13025 | 6  |
| Donor2-CGAATGTCAGACACTT-1  | 1805 | 10448 | 8  |
| Donor2-CGAATGTGTGAGTATA-1  | 2467 | 6212  | 8  |
| Donor2-CGAATGTTTCGGCGCTA-1 | 2146 | 6487  | 11 |
| Donor2-CGACCTTCAATGAATG-1  | 7013 | 35058 | 6  |
| Donor2-CGACCTTCATGTAGTC-1  | 1824 | 6407  | 13 |
| Donor2-CGACCTTTCATAGCAC-1  | 2246 | 9775  | 7  |
| Donor2-CGAGAAGAGAAGCCCA-1  | 2560 | 8906  | 7  |
| Donor2-CGAGAAGCAATTGCTG-1  | 1838 | 6375  | 13 |
| Donor2-CGAGCACCACATTCGA-1  | 2410 | 9992  | 13 |
| Donor2-CGAGCACGTGGCAAAC-1  | 1544 | 7672  | 8  |
| Donor2-CGAGCCATCTTGTATC-1  | 2017 | 7978  | 13 |
| Donor2-CGATCGGCACGACTCG-1  | 5250 | 24281 | 6  |
| Donor2-CGATCGGGTTAGAACA-1  | 1405 | 6787  | 8  |
| Donor2-CGATGTACAGCTCGCA-1  | 3183 | 9525  | 8  |
| Donor2-CGATGTAGTATATGGA-1  | 4549 | 30189 | 6  |
| Donor2-CGATGTATCGCCAGCA-1  | 2108 | 5400  | 10 |
| Donor2-CGATTGAAGTACGACG-1  | 2995 | 5755  | 6  |
| Donor2-CGATTGACACAAGCCC-1  | 3566 | 8866  | 8  |
| Donor2-CGCCAAGAGCTCTCGG-1  | 1888 | 6302  | 9  |
| Donor2-CGCCAAGAGGTGACCA-1  | 2446 | 11651 | 7  |
| Donor2-CGCGGTACATACTACG-1  | 1735 | 5913  | 9  |

|                            |      |       |    |
|----------------------------|------|-------|----|
| Donor2-CGCGGTAGTAAGCACG-1  | 2235 | 5855  | 11 |
| Donor2-CGCGGTAGTAGTACCT-1  | 1819 | 9968  | 8  |
| Donor2-CGCGGTATCACGAAGG-1  | 2272 | 17642 | 8  |
| Donor2-CGCTATCCAGTTCCCT-1  | 1908 | 5897  | 7  |
| Donor2-CGCTATCGTAGCTTGT-1  | 1658 | 5804  | 13 |
| Donor2-CGCTATCTCCTAGGGC-1  | 1470 | 6234  | 13 |
| Donor2-CGCTGGACAATCCGAT-1  | 2093 | 8399  | 7  |
| Donor2-CGCTGGACATATGGTC-1  | 2013 | 6925  | 9  |
| Donor2-CGCTGGAGTCGATTGT-1  | 2026 | 7651  | 9  |
| Donor2-CGCTGGAGTTAAGTAG-1  | 2263 | 13665 | 7  |
| Donor2-CGCTTCACAATCCGAT-1  | 1811 | 8338  | 7  |
| Donor2-CGCTTCACATCACAAC-1  | 2224 | 8023  | 10 |
| Donor2-CGGACACGTCTGCGGT-1  | 6472 | 31045 | 6  |
| Donor2-CGGACACGTGATGCCC-1  | 2914 | 9398  | 11 |
| Donor2-CGGACGTAGAAACCGC-1  | 1709 | 5798  | 13 |
| Donor2-CGGACGTAGCCCAGCT-1  | 6400 | 32564 | 4  |
| Donor2-CGGACGTTCACTTCAT-1  | 6229 | 27006 | 6  |
| Donor2-CGGACTGAGAGTCGGT-1  | 7050 | 33908 | 5  |
| Donor2-CGGACTGCAGGTGCCT-1  | 5950 | 44344 | 11 |
| Donor2-CGGACTGGTTGCTCCT-1  | 4553 | 23351 | 6  |
| Donor2-CGGAGCTCATTACCTT-1  | 3135 | 21382 | 8  |
| Donor2-CGGAGCTGTTAGAACA-1  | 2849 | 5503  | 5  |
| Donor2-CGGAGTCAGATAGCAT-1  | 3029 | 22093 | 7  |
| Donor2-CGGAGTCGTCTTTCAT-1  | 3133 | 16931 | 7  |
| Donor2-CGGAGTCGTGATGCCC-1  | 1755 | 7315  | 7  |
| Donor2-CGGCTAGAGGGAACGG-1  | 1704 | 8509  | 7  |
| Donor2-CGGCTAGAGTGACTCT-1  | 5727 | 20455 | 5  |
| Donor2-CGGGTCAGTCATACTG-1  | 1751 | 8068  | 8  |
| Donor2-CGGGTCATCGGACAAG-1  | 3172 | 11187 | 13 |
| Donor2-CGGTTAAGTCAACTGT-1  | 1433 | 7080  | 8  |
| Donor2-CGGTTAAGTTCCGTCT-1  | 1621 | 5716  | 13 |
| Donor2-CGGTTAATCAGGTAAA-1  | 2499 | 8950  | 9  |
| Donor2-CGTAGCGAGCAAATCA-1  | 7192 | 40764 | 4  |
| Donor2-CGTAGCGAGCGTGAGT-1  | 2709 | 5388  | 6  |
| Donor2-CGTAGGCAGCATGGCA-1  | 1719 | 8766  | 8  |
| Donor2-CGTCAGGAGAGGTTAT-1  | 6581 | 21635 | 1  |
| Donor2-CGTCAGGCAACACCCG-1  | 5192 | 25204 | 5  |
| Donor2-CGTCAGGCAGACACTT-1  | 5770 | 40072 | 6  |
| Donor2-CGTCCATGTCATGCAT-1  | 2189 | 7949  | 9  |
| Donor2-CGTCTACCACCAACCG-1  | 2980 | 8750  | 11 |
| Donor2-CGTCTACGTCAATGTC-1  | 2268 | 7070  | 13 |
| Donor2-CGTCTACTCGTTACGA-1  | 3481 | 21356 | 7  |
| Donor2-CGTGAGCCAGTAGAGC-1  | 3615 | 28261 | 7  |
| Donor2-CGTGAGCGTACTCTCC-1  | 3432 | 7724  | 6  |
| Donor2-CGTGTAAAGGCGTACA-1  | 3697 | 23834 | 7  |
| Donor2-CGTGTAAAGTATGGTTC-1 | 2726 | 7667  | 11 |
| Donor2-CGTGTCTAGAGGTTAT-1  | 3812 | 17778 | 10 |
| Donor2-CGTGTCTAGGCATTGG-1  | 2997 | 13893 | 10 |
| Donor2-CGTGTCTGTACATGTC-1  | 2194 | 6366  | 11 |
| Donor2-CGTTAGAAGTACGCC-1   | 4692 | 13105 | 2  |
| Donor2-CGTTCTGCACGAGAGT-1  | 6228 | 27361 | 6  |
| Donor2-CGTTCTGCATGGAATA-1  | 6755 | 37946 | 4  |
| Donor2-CGTTCTGGTTTCGCTC-1  | 2780 | 5689  | 4  |
| Donor2-CGTTCTGTCCACGAAT-1  | 3269 | 8256  | 1  |
| Donor2-CGTTCTGTCTTAACCT-1  | 6736 | 29564 | 5  |
| Donor2-CGTTGGGGTCGCATAT-1  | 6420 | 28886 | 6  |



Donor2-CGTTGGGTCCGCAAGC-1 1885 6012 13  
Donor2-CTAACTTGTTCCCGAG-1 3883 10471 2  
Donor2-CTAAGACAGCGTAATA-1 2792 17008 7  
Donor2-CTAAGACAGCTTATCG-1 6873 35113 6  
Donor2-CTAAGACAGTCCAGGA-1 7509 60796 6  
Donor2-CTAAGACTCTTAGAGC-1 1590 6874 8  
Donor2-CTAATGGGTACTCTCC-1 1304 5823 8  
Donor2-CTACACCAGAAGATTC-1 1688 10277 8  
Donor2-CTACATTAGCCTATGT-1 2392 7874 13  
Donor2-CTACATTAGTACGCGA-1 4969 26904 10  
Donor2-CTACATTGTACGCTGC-1 1991 6027 11  
Donor2-CTACATTGTGTGAATA-1 2190 5405 11  
Donor2-CTACCCAAGGGTCTCC-1 2784 7700 8  
Donor2-CTACCCATCACCAGGC-1 3621 10135 8  
Donor2-CTACCCATCGGTTAAC-1 4986 14820 5  
Donor2-CTACGTCAGTTAGGTA-1 1809 10354 8  
Donor2-CTACGTCTCAAACCGT-1 3307 7566 3  
Donor2-CTACGTCTCAACGAAA-1 3417 19419 7  
Donor2-CTAGAGTAGGTGATAT-1 2980 9040 11  
Donor2-CTAGAGTGTCCATCCT-1 3486 8570 4  
Donor2-CTAGAGTTCATTTGGG-1 4003 10301 3  
Donor2-CTAGAGTTCCTATGTT-1 5915 25227 6  
Donor2-CTAGAGTTCGTACCGG-1 2953 11550 10  
Donor2-CTAGCCTAGGCAGGTT-1 4658 14023 1  
Donor2-CTAGCCTCAAGGTAA-1 3632 19466 7  
Donor2-CTAGTGAGTAAAGTCA-1 5249 17379 4  
Donor2-CTAGTGATCAACGAAA-1 3048 13590 7  
Donor2-CTCACACCATCTACGA-1 3862 35446 7  
Donor2-CTCACACTCAACGCTA-1 2461 11843 7  
Donor2-CTCAGAACAACACTGTC-1 5337 16619 6  
Donor2-CTCAGAACATACGCCG-1 3845 10587 3  
Donor2-CTCAGAATCTTCCTTC-1 2139 6933 13  
Donor2-CTCATTATCTCCTATA-1 3306 11163 11  
Donor2-CTCCTAGAGATGGCGT-1 3222 7637 3  
Donor2-CTCCTAGCACGGTAGA-1 4415 35408 7  
Donor2-CTCGAAATCTTTAGTC-1 2044 7488 9  
Donor2-CTCGTACCACAAGACG-1 3175 6383 5  
Donor2-CTCGTACGTAAGCACG-1 2423 8908 13  
Donor2-CTCGTACTCGCCAAAT-1 1674 10321 8  
Donor2-CTCGTACTCTCAACTT-1 3335 7483 6  
Donor2-CTCGTCAGTTCTCATT-1 5041 16377 1  
Donor2-CTCTAATAGTGGAGTC-1 1926 11069 8  
Donor2-CTCTAATGTTGATTTCG-1 5202 18910 6  
Donor2-CTCTAATTCACGCGGT-1 3545 10259 4  
Donor2-CTCTACGGTAAGGGAA-1 2735 8741 11  
Donor2-CTCTGGTAGCGATCCC-1 4142 24285 6  
Donor2-CTCTGGTAGGCTAGCA-1 4097 15968 6  
Donor2-CTCTGGTCAAGCCCAC-1 1810 5622 9  
Donor2-CTGAAACAGGCAATTA-1 6820 40146 4  
Donor2-CTGAAACCACGCTTTC-1 2020 7631 7  
Donor2-CTGAAGTAGAGACGAA-1 1283 6043 8  
Donor2-CTGAAGTCAGGACGTA-1 3231 12056 6  
Donor2-CTGATAGTCACCACCT-1 2345 9530 13  
Donor2-CTGATCCCAAGGTGTG-1 4184 11269 6  
Donor2-CTGCCTACACTACAGT-1 2166 8218 13  
Donor2-CTGCCTAGTCTAGCGC-1 3443 8526 3

|                            |      |       |    |
|----------------------------|------|-------|----|
| Donor2-CTGCGGATCAGGTTCA-1  | 1996 | 6774  | 13 |
| Donor2-CTGCTGTAGACCACGA-1  | 1642 | 7102  | 8  |
| Donor2-CTGCTGTCACCAACCG-1  | 4011 | 10627 | 3  |
| Donor2-CTGCTGTCATCAGTCA-1  | 1742 | 10168 | 8  |
| Donor2-CTGGTCTAGGATGGAA-1  | 3706 | 9462  | 2  |
| Donor2-CTGGTCTGTCCGTCAG-1  | 2168 | 5732  | 12 |
| Donor2-CTGTGCTAGTACGTTTC-1 | 2706 | 11374 | 13 |
| Donor2-CTGTTTATCCAGAGGA-1  | 1918 | 6626  | 13 |
| Donor2-CTTAACTCATGCCTAA-1  | 2403 | 9584  | 9  |
| Donor2-CTTACCGGTGACGGTA-1  | 3886 | 24024 | 7  |
| Donor2-CTTACCGTCACCGGGT-1  | 9215 | 58990 | 6  |
| Donor2-CTTACCGTCTGCGGCA-1  | 5332 | 21826 | 5  |
| Donor2-CTTAGGAAGTGGGATC-1  | 1442 | 7441  | 8  |
| Donor2-CTTGGCTGTAATCACC-1  | 6933 | 53938 | 5  |
| Donor2-CTTTGCGAGGTAGCTG-1  | 4826 | 13904 | 5  |
| Donor2-CTTTGCGAGGTGCACA-1  | 2892 | 11875 | 10 |
| Donor2-CTTTGCGCACCCAGTG-1  | 2201 | 7637  | 13 |
| Donor2-CTTTGCGCAGACGCTC-1  | 3362 | 10552 | 11 |
| Donor2-CTTTGCGCAGTATCTG-1  | 4908 | 25869 | 6  |
| Donor2-CTTTGCGTCGTTGCCT-1  | 3143 | 10502 | 11 |
| Donor2-GAAACTCCAAGACACG-1  | 7820 | 52745 | 6  |
| Donor2-GAAACTCCAATAGCGG-1  | 2468 | 9332  | 7  |
| Donor2-GAAACTCTCTAACTCT-1  | 3049 | 7203  | 8  |
| Donor2-GAAATGAAGCCCAACC-1  | 1883 | 5823  | 13 |
| Donor2-GAAATGACAACACGCC-1  | 3530 | 12596 | 5  |
| Donor2-GAACATCCAGTAAGCG-1  | 1888 | 12205 | 8  |
| Donor2-GAACCTACAAGTACCT-1  | 7965 | 82574 | 4  |
| Donor2-GAACGGACAAACCTAC-1  | 2062 | 5718  | 11 |
| Donor2-GAACGGAGTAAACGCG-1  | 3244 | 6997  | 3  |
| Donor2-GAACGGAGTCTAGCCG-1  | 1968 | 9221  | 7  |
| Donor2-GAAGCAGCACTCAGGC-1  | 2013 | 11016 | 8  |
| Donor2-GAATAAGAGAAGAAGC-1  | 2625 | 10030 | 10 |
| Donor2-GAATGAAGTTGATTGC-1  | 3335 | 7787  | 8  |
| Donor2-GAATGAATCAATCTCT-1  | 3627 | 11923 | 11 |
| Donor2-GACACGCAGTGTTTGC-1  | 1913 | 5950  | 13 |
| Donor2-GACACGCGTAAATACG-1  | 2593 | 11388 | 7  |
| Donor2-GACAGAGCAAGGTTCT-1  | 1777 | 6874  | 8  |
| Donor2-GACAGAGTCTCACATT-1  | 1971 | 7493  | 9  |
| Donor2-GACCAATAGGGTATCG-1  | 3849 | 10878 | 5  |
| Donor2-GACCAATAGTTGAGTA-1  | 2542 | 7954  | 8  |
| Donor2-GACCAATCAACACGCC-1  | 1537 | 5422  | 7  |
| Donor2-GACCAATCAATGGAAT-1  | 1479 | 5404  | 9  |
| Donor2-GACCAATGTATATGAG-1  | 4711 | 21575 | 10 |
| Donor2-GACCTGGCAAGCGTAG-1  | 6435 | 34776 | 6  |
| Donor2-GACCTGGGTAAACCTC-1  | 2369 | 15261 | 8  |
| Donor2-GACCTGGGTACAAGTA-1  | 1299 | 5547  | 8  |
| Donor2-GACCTGGGTACTTCTT-1  | 3615 | 14361 | 9  |
| Donor2-GACGCGTAGACGCTTT-1  | 1747 | 6961  | 7  |
| Donor2-GACGCGTAGATGCCAG-1  | 2143 | 8898  | 7  |
| Donor2-GACGGCTAGCTAGGCA-1  | 1320 | 5440  | 8  |
| Donor2-GACGGCTAGGACAGAA-1  | 1819 | 8977  | 8  |
| Donor2-GACGGCTCAATGCCAT-1  | 2961 | 8578  | 11 |
| Donor2-GACGTGCAGGCATGGT-1  | 1727 | 5560  | 13 |
| Donor2-GACGTGCCAAATTGCC-1  | 3420 | 14488 | 6  |
| Donor2-GACGTTAAGGTAAACT-1  | 1704 | 7536  | 9  |
| Donor2-GACGTTAGTAAGTGGC-1  | 2319 | 7655  | 13 |

|                            |      |       |    |
|----------------------------|------|-------|----|
| Donor2-GACTAACAGGAGCGTT-1  | 6868 | 31599 | 5  |
| Donor2-GACTACAGTTAGGGTG-1  | 2594 | 11529 | 7  |
| Donor2-GACTACATCGAGAACG-1  | 2198 | 6829  | 11 |
| Donor2-GACTGCGCAGAGTGTG-1  | 5645 | 18969 | 5  |
| Donor2-GACTGCGTCCGCGTTT-1  | 1466 | 6027  | 8  |
| Donor2-GACTGCGTCTCGGACG-1  | 2213 | 10027 | 7  |
| Donor2-GAGCAGAAGGGCACTA-1  | 1861 | 6663  | 7  |
| Donor2-GAGGTGACATGGGACA-1  | 3301 | 11735 | 6  |
| Donor2-GATCAGTAGACAGACC-1  | 3455 | 23473 | 7  |
| Donor2-GATCAGTAGCGTTGCC-1  | 3753 | 22456 | 7  |
| Donor2-GATCAGTCAGCAGTTT-1  | 1442 | 8562  | 8  |
| Donor2-GATCAGTCAGGGTTAG-1  | 3917 | 12352 | 6  |
| Donor2-GATCGATGTCGGCATC-1  | 5603 | 21566 | 6  |
| Donor2-GATCGCGAGCTGAAAT-1  | 4327 | 12201 | 3  |
| Donor2-GATCGCGCATTTCCT-1   | 1774 | 5887  | 10 |
| Donor2-GATGCTAGTTAGATGA-1  | 2099 | 8508  | 13 |
| Donor2-GATGCTATCCGTAGTA-1  | 1884 | 11242 | 8  |
| Donor2-GATTCAGTCATGTCCC-1  | 1349 | 5859  | 8  |
| Donor2-GATTCAGTCGAACTGT-1  | 4300 | 10925 | 5  |
| Donor2-GCAAACCTAGGCGCTCT-1 | 3434 | 13949 | 11 |
| Donor2-GCAAACCTCCAGATCA-1  | 2391 | 12905 | 7  |
| Donor2-GCAAACCTCGCTTGTC-1  | 5929 | 25045 | 6  |
| Donor2-GCAAACCTTCTGTTTGT-1 | 9591 | 54473 | 5  |
| Donor2-GCAATCACAGGCTGAA-1  | 4096 | 11033 | 4  |
| Donor2-GCACATAACAATAACGA-1 | 2554 | 10416 | 10 |
| Donor2-GCACATATCAACTCTT-1  | 5102 | 24149 | 5  |
| Donor2-GCACATATCTAAGCCA-1  | 2202 | 6651  | 11 |
| Donor2-GCACTCTCAGCTGTGC-1  | 3973 | 17549 | 10 |
| Donor2-GCACTCTCAGTCAGCC-1  | 2167 | 6935  | 13 |
| Donor2-GCACTCTCATTCGACA-1  | 4074 | 14009 | 10 |
| Donor2-GCACTCTGTGTGCGTC-1  | 2134 | 8750  | 9  |
| Donor2-GCACTCTTCTGGGCCA-1  | 1901 | 6492  | 9  |
| Donor2-GCAGCCATCTAACTGG-1  | 1900 | 7845  | 7  |
| Donor2-GCAGCCATCTTCTGGC-1  | 4623 | 14956 | 4  |
| Donor2-GCATAACAAGGGTTTCT-1 | 2310 | 6599  | 11 |
| Donor2-GCATGATGTAATCACC-1  | 5211 | 16610 | 6  |
| Donor2-GCATGTACACGGTTTA-1  | 2438 | 6565  | 11 |
| Donor2-GCATGTACATCGGACC-1  | 5402 | 20569 | 1  |
| Donor2-GCATGTACATCTGGTA-1  | 8056 | 50776 | 6  |
| Donor2-GCCAAATTCATCGATG-1  | 4462 | 12165 | 1  |
| Donor2-GCCTCTAGTGTCCCTCT-1 | 4148 | 15175 | 11 |
| Donor2-GCGACCACACATCCAA-1  | 2044 | 12818 | 8  |
| Donor2-GCGACCACATCCAACA-1  | 2180 | 5787  | 11 |
| Donor2-GCGCAACAGGAGCGTT-1  | 9573 | 76949 | 6  |
| Donor2-GCGCAACCAAGCCGTC-1  | 6323 | 32855 | 6  |
| Donor2-GCGCAACCAATACGCT-1  | 1934 | 7592  | 9  |
| Donor2-GCGCAACGTCTTCGTC-1  | 2003 | 10779 | 8  |
| Donor2-GCGCAACTCAGCAACT-1  | 2342 | 7874  | 13 |
| Donor2-GCGCAGTCACTGTGTA-1  | 5125 | 16408 | 4  |
| Donor2-GCGCCAAAGCAGCGTA-1  | 3522 | 16634 | 6  |
| Donor2-GCGCCAAAGCTGAAAT-1  | 2022 | 6860  | 13 |
| Donor2-GCGCCAAAGGGCTTGA-1  | 2991 | 9039  | 6  |
| Donor2-GCGCGATAGGTGCAAC-1  | 7524 | 40702 | 6  |
| Donor2-GCGCGATCAAGCTGTT-1  | 2380 | 13823 | 7  |
| Donor2-GCGCGATGTTTCAGACT-1 | 5174 | 25467 | 5  |
| Donor2-GCGGGTTCACGACGAA-1  | 7031 | 33716 | 6  |

Donor2-GCGGGTTGTCACCTGGC-1 2934 17600 7  
Donor2-GCTCCTACACATTCGA-1 5085 17506 2  
Donor2-GCTCTGTAGATATGGT-1 2062 12537 8  
Donor2-GCTGCAGAGAGTCTGG-1 1743 6469 9  
Donor2-GCTGCAGAGATATGCA-1 2935 12411 13  
Donor2-GCTGCAGAGCTGCAAG-1 2660 9258 7  
Donor2-GCTGCAGAGTGGACGT-1 5413 23718 5  
Donor2-GCTGCAGGTTGGTAAA-1 2334 10197 7  
Donor2-GCTGCAGTCACCGTAA-1 7051 31759 1  
Donor2-GCTGCGACAGTTCATG-1 4072 14693 11  
Donor2-GCTGCGAGTAAACACA-1 2485 7221 11  
Donor2-GCTGCGATCCGTTGCT-1 5496 18690 6  
Donor2-GCTGCTTAGTCGAGTG-1 1925 7847 9  
Donor2-GCTGCTTCAAGCCCAC-1 7819 49813 5  
Donor2-GCTTCCACAGCGATCC-1 3311 7385 3  
Donor2-GCTTGAACAGACAAAT-1 2579 12636 7  
Donor2-GCTTGAACATTATCTC-1 2650 13923 7  
Donor2-GCTTGAAGTAGGACAC-1 2376 10925 7  
Donor2-GCTTGAATCTGGGCCA-1 2714 8135 11  
Donor2-GGAAAGCAGCCATCGC-1 7872 69566 6  
Donor2-GGAAAGCGTACGCTGC-1 3318 10408 11  
Donor2-GGAAAGCTCATCACCC-1 5143 22095 6  
Donor2-GGAACTTGTAGCCTAT-1 1601 6634 8  
Donor2-GGAACTTTCACTCCTG-1 2404 8514 13  
Donor2-GGAATAACATTCGACA-1 4388 12724 4  
Donor2-GGAATAATCATTGCC-1 6280 34723 5  
Donor2-GGACAAGAGAGTACCG-1 4145 10720 5  
Donor2-GGACAAGCACAGACAG-1 3756 11442 6  
Donor2-GGACAAGCATATACGC-1 6580 29232 5  
Donor2-GGACAAGTCCGTACAA-1 4259 11740 4  
Donor2-GGACAGAAGACAGAGA-1 8207 65382 6  
Donor2-GGACAGAAGTACGTAA-1 2381 9093 9  
Donor2-GGACATTCATATACGC-1 1715 5530 13  
Donor2-GGACATTGTAGAGCTG-1 6264 31216 5  
Donor2-GGACATTGTCCGTCAG-1 4276 29545 7  
Donor2-GGACATTTCTGGTGTA-1 2698 21926 8  
Donor2-GGAGCAACACGGTAGA-1 2844 9470 11  
Donor2-GGAGCAATCGCATGGC-1 1717 5651 9  
Donor2-GGATGTTAGCGTTTAC-1 2222 6708 11  
Donor2-GGATGTTTCATGCCTAA-1 7349 44276 6  
Donor2-GGATGTTTCAATAAGG-1 2006 12156 8  
Donor2-GGATGTTTCCGCAAGC-1 2545 5619 3  
Donor2-GGATTACAGCCACGTC-1 1672 5864 13  
Donor2-GGATTACAGTGAAGAG-1 4316 11546 4  
Donor2-GGATTACTCATTTGGG-1 4721 14100 1  
Donor2-GGATTACTCCCGACTT-1 1398 6427 8  
Donor2-GGCAATTGTACACCGC-1 3448 11388 13  
Donor2-GGCCGATGTAGCGCTC-1 3483 7345 6  
Donor2-GGCCGATGTGGAACAG-1 1981 7340 7  
Donor2-GGCGACTCAAGCGCTC-1 2787 6678 1  
Donor2-GGCGACTCATCGGAAG-1 8974 71391 6  
Donor2-GGCGACTGTTCTGTGAT-1 2129 8500 13  
Donor2-GGCGTGTTCATGTAGTC-1 2628 15453 8  
Donor2-GGCGTGTGTAGCGTGA-1 1984 13928 8  
Donor2-GGCGTGTGTGCTTCTC-1 1976 6470 7  
Donor2-GGCTCGAAGTACGTAA-1 3226 14955 13

Donor2-GGCTCGAGTGGGTCAA-1 1788 5968 9  
Donor2-GGCTCGATCATCGATG-1 7792 42762 5  
Donor2-GGCTGGTAGCGTCTAT-1 4956 17078 6  
Donor2-GGGAATGGTGCGAAAC-1 5463 20542 5  
Donor2-GGGAATGGTTGGTAAA-1 1693 5385 13  
Donor2-GGGAATGGTTGTACAC-1 1651 5388 13  
Donor2-GGGAATGTCTTATCTG-1 2598 12786 7  
Donor2-GGGACCTCAAACCCAT-1 5578 20393 5  
Donor2-GGGACCTTCAACACTG-1 2212 6455 13  
Donor2-GGGACCTTCTGTCTAT-1 3033 9116 11  
Donor2-GGGAGATAGTTCGATC-1 3797 19620 6  
Donor2-GGGAGATGTATCGCAT-1 4836 27312 6  
Donor2-GGGAGATGTCTAGCCG-1 3123 16948 7  
Donor2-GGGCATCCAATGCCAT-1 5838 22344 6  
Donor2-GGGCATCCATCTCGCT-1 2422 10238 6  
Donor2-GGGCATCTCCTTTCGG-1 4306 11820 4  
Donor2-GGGTCTGTCCTAGGGC-1 4044 10469 4  
Donor2-GGGTTGCTCGCCGTGA-1 3655 20091 9  
Donor2-GGTATTGGTCTAACGT-1 5533 19231 2  
Donor2-GGTGAAGAGGCCATAG-1 3314 20968 7  
Donor2-GGTGCGTCACGAGAGT-1 2441 10283 9  
Donor2-GTAACGTAGACCGGAT-1 2853 14510 7  
Donor2-GTAACTGAGATCCGAG-1 5196 19111 5  
Donor2-GTAACTGCACCGCTAG-1 1862 6566 13  
Donor2-GTAACTGGTCCTGCTT-1 6272 24982 6  
Donor2-GTACGTAAGCCCAATT-1 1674 5414 9  
Donor2-GTACGTAAGGCAGTCA-1 2035 7220 10  
Donor2-GTACTTTAGTCCATAC-1 9525 108016 6  
Donor2-GTAGGCCGTAGCCTCG-1 2373 16794 8  
Donor2-GTAGTCACAATGTTGC-1 4316 16513 6  
Donor2-GTAGTCAGTTCTGGTA-1 3063 9966 11  
Donor2-GTATTCTAGTCTTGCA-1 3413 14840 10  
Donor2-GTCAAGTCAGCTTCGG-1 3074 11659 11  
Donor2-GTCACGGAGCCGGTAA-1 1782 7715 7  
Donor2-GTCATTTTCTAACTTC-1 5251 17326 6  
Donor2-GTCCTCAGTAAGCACG-1 2784 15082 7  
Donor2-GTCCTCAGTCCGCTGA-1 4324 16866 6  
Donor2-GTCCTCATCACACCT-1 3930 10193 3  
Donor2-GTCGGGTCATGGATGG-1 4555 13775 5  
Donor2-GTCGGGTGTCTCTTAT-1 1909 6831 9  
Donor2-GTCGTAAGTTACGTCA-1 2152 6566 11  
Donor2-GTCGTAATCACAGGCC-1 3654 7848 5  
Donor2-GTCGTAATCACACCT-1 2382 5555 8  
Donor2-GTCTCGTAGGCTCTTA-1 2561 7843 11  
Donor2-GTCTCGTTCGTCGTTC-1 6132 32114 5  
Donor2-GTCTCGTTCTTGAGAC-1 1967 8256 8  
Donor2-GTCTTCGTCTAACTTC-1 1795 6866 9  
Donor2-GTCTTCGTCTTGGGTA-1 1840 8602 7  
Donor2-GTGAAGGAGCCAGTAG-1 4663 21165 5  
Donor2-GTGAAGGCAGCATACT-1 4993 15232 5  
Donor2-GTGAAGGGTAATAGCA-1 3456 8724 3  
Donor2-GTGCAGCGTCACCTAA-1 1720 5377 13  
Donor2-GTGCATAAGCACCGTC-1 2973 9493 11  
Donor2-GTGCATATCACCTTAT-1 5723 20355 5  
Donor2-GTGCGGTGTAAACACA-1 3231 9864 6  
Donor2-GTGCTTCAGAGGGATA-1 6293 23924 1

|                              |      |       |    |
|------------------------------|------|-------|----|
| Donor2-GTGCTTCTCATGGTCA-1    | 6013 | 24013 | 6  |
| Donor2-GTGGGTCCAGTACACT-1    | 6326 | 26841 | 4  |
| Donor2-GTGGGTCCATGATCCA-1    | 1990 | 6292  | 13 |
| Donor2-GTGGGTTCGTATGAATG-1   | 8837 | 99628 | 5  |
| Donor2-GTGGGTCTCACGCATA-1    | 1808 | 5932  | 13 |
| Donor2-GTGTGCGAGATCCTGT-1    | 1917 | 7002  | 13 |
| Donor2-GTGTGCGGTGTCTGAT-1    | 5512 | 18986 | 4  |
| Donor2-GTGTGCGTCGTCCAGG-1    | 5073 | 19358 | 6  |
| Donor2-GTGTTAGAGAGGACGG-1    | 3133 | 9578  | 4  |
| Donor2-GTGTTAGAGCAATCTC-1    | 2395 | 7337  | 11 |
| Donor2-GTGTTAGAGCCACCTG-1    | 2114 | 5855  | 11 |
| Donor2-GTGTTAGTCTGGCGAC-1    | 1313 | 6205  | 8  |
| Donor2-GTTAAGCAGATAGCAT-1    | 6454 | 48712 | 6  |
| Donor2-GTTAAGCAGGCTATCT-1    | 7550 | 40025 | 5  |
| Donor2-GTTAAGCGTTAAAGTG-1    | 4955 | 20736 | 5  |
| Donor2-GTTAAGCTCAGTACGT-1    | 3218 | 18571 | 7  |
| Donor2-GTTAAGCTCATCGGAT-1    | 2304 | 10961 | 7  |
| Donor2-GTTAAGCTCCCGACTT-1    | 1777 | 6108  | 13 |
| Donor2-GTTACAGCACCTCGGA-1    | 1860 | 9170  | 7  |
| Donor2-GTTCATTGTGTGAAAT-1    | 3691 | 9521  | 2  |
| Donor2-GTTCATTTCACTCTTA-1    | 2536 | 9253  | 8  |
| Donor2-GTTCATTTCCCACTTG-1    | 2827 | 9021  | 13 |
| Donor2-GTTCTCGCAACGATCT-1    | 3485 | 12121 | 11 |
| Donor2-GTTCTCGCAATGGAAT-1    | 3152 | 8692  | 1  |
| Donor2-GTTCTCGGTTTACTCT-1    | 6684 | 29619 | 6  |
| Donor2-GTTTCTAGTCTCAACA-1    | 2284 | 7154  | 13 |
| Donor2-GTTTCTATCTCGAGTA-1    | 2717 | 5757  | 5  |
| Donor2-TAAACCGAGACAGACC-1    | 2326 | 13192 | 8  |
| Donor2-TAAACCGAGGCAAAGA-1    | 5713 | 39155 | 6  |
| Donor2-TAAACCGAGTGACATA-1    | 2832 | 13568 | 7  |
| Donor2-TAAACCGCAGTGGAGT-1    | 4687 | 15159 | 8  |
| Donor2-TAAACCGTCGTTTGCC-1    | 3399 | 11772 | 4  |
| Donor2-TAAGAGAAGCATCATC-1    | 4634 | 27735 | 6  |
| Donor2-TAAGAGACATGCTGGC-1    | 2429 | 6021  | 11 |
| Donor2-TAAGCGTGTGTACAC-1     | 2842 | 9806  | 11 |
| Donor2-TAAGTGCAGGCATGTG-1    | 3053 | 7238  | 1  |
| Donor2-TACACGAAGTGCGTGA-1    | 2343 | 10028 | 7  |
| Donor2-TACAGTGAGGGCTCTC-1    | 5938 | 29058 | 1  |
| Donor2-TACAGTGGTACGACCC-1    | 2239 | 6456  | 13 |
| Donor2-TACAGTGGTTGTGGAG-1    | 2224 | 9476  | 9  |
| Donor2-TACCTATAGAGTACAT-1    | 5140 | 16682 | 6  |
| Donor2-TACCTATAGCCTATGT-1    | 2146 | 7433  | 13 |
| Donor2-TACCTATTCCAAATGC-1    | 3213 | 7823  | 11 |
| Donor2-TACCTATTCTGTGCAA-1    | 2269 | 6823  | 10 |
| Donor2-TACCTTAGTGGTACAG-1    | 1732 | 7284  | 8  |
| Donor2-TACTCATCAAAGTCAA-1    | 2189 | 6575  | 9  |
| Donor2-TACTCGCCAGCTGCAC-1    | 4949 | 15052 | 5  |
| Donor2-TACTTACAGTCGTACTION-1 | 2320 | 7939  | 11 |
| Donor2-TACTTACAGTGGGATC-1    | 5604 | 22462 | 6  |
| Donor2-TACTTACCAACTIONGTC-1  | 2110 | 8163  | 9  |
| Donor2-TACTTACTCTTCTGGC-1    | 2050 | 10464 | 7  |
| Donor2-TACTTGTACGGCTAC-1     | 2148 | 5599  | 11 |
| Donor2-TAGCCGGAGCTAACAA-1    | 1983 | 8451  | 13 |
| Donor2-TAGCCGGCAACACGCC-1    | 7699 | 43168 | 6  |
| Donor2-TAGCCGGCAGACGTAG-1    | 5680 | 31603 | 5  |
| Donor2-TAGCCGGTCACAGGCC-1    | 2457 | 9376  | 9  |

Donor2-TAGGCATGTGGACGAT-1 2543 6900 4  
Donor2-TAGGCATGTGTTCGAT-1 5232 16821 5  
Donor2-TAGTTGGGTGGGTCAA-1 1750 5851 7  
Donor2-TAGTTGGGTGTCTTT-1 4852 17299 6  
Donor2-TATCAGGGTCAACATC-1 4326 24439 6  
Donor2-TATCTCACATTACGAC-1 5636 22242 6  
Donor2-TATCTCAGTCCGACGT-1 2619 12841 7  
Donor2-TATCTCAGTGCAACGA-1 1460 5488 13  
Donor2-TATGCCCAGACTACAA-1 5271 15008 1  
Donor2-TATGCCCCACCAGTTA-1 5079 22922 6  
Donor2-TATGCCCGTTATTCTC-1 4257 24773 6  
Donor2-TCAACGATCCAAACAC-1 3836 12432 11  
Donor2-TCAATCTGTCACTTCC-1 1994 6643 13  
Donor2-TCACAAGCAGTTTACG-1 2910 6025 4  
Donor2-TCACGAAAGGTACTCT-1 3011 18220 7  
Donor2-TCACGAAGTTGTGCGG-1 2585 10361 13  
Donor2-TCACGAATCATCGATG-1 3367 19878 7  
Donor2-TCAGATGAGGCATGGT-1 2509 7930 7  
Donor2-TCAGATGAGGTTACCT-1 2403 6296 5  
Donor2-TCAGCAAAGGGATGGG-1 3518 13057 4  
Donor2-TCAGCAACATTACGAC-1 1886 6941 9  
Donor2-TCAGCAAGTATGCTTG-1 4018 11178 4  
Donor2-TCAGCAATCTCGGACG-1 3337 7298 3  
Donor2-TCAGCTCCATGACATC-1 6251 44929 6  
Donor2-TCAGGATAGACTTGAA-1 1397 5396 8  
Donor2-TCAGGATCAGTTCCT-1 6388 34245 6  
Donor2-TCAGGATCATCGATTG-1 4076 10340 5  
Donor2-TCAGGTAGTTACCAGT-1 1835 5591 13  
Donor2-TCAGGTAGTTACGGAG-1 2617 6005 1  
Donor2-TCAGGTATCTACCAGA-1 4505 14252 2  
Donor2-TCATTACAGATCGGGT-1 1501 7093 8  
Donor2-TCATTACCACGGTAAG-1 2099 6671 12  
Donor2-TCATTTGAGCACCGTC-1 1870 5494 13  
Donor2-TCATTTGAGGTCATCT-1 2441 9738 7  
Donor2-TCATTTGCACGGTAAG-1 2386 7150 9  
Donor2-TCATTTGCAGAAGCAC-1 3477 12441 11  
Donor2-TCATTTGTCGCAAGCC-1 1839 10780 8  
Donor2-TCCACACCAAAGAATC-1 2553 6876 5  
Donor2-TCCACACGTCGAATCT-1 3319 8718 1  
Donor2-TCCCGATAGCCAACAG-1 2067 6265 10  
Donor2-TCCCGATGTAACGTTT-1 4108 15128 6  
Donor2-TCGAGGCAGCCCGAAA-1 1796 10716 8  
Donor2-TCGAGGCTCAACTCTT-1 2091 6454 13  
Donor2-TCGCGAGGTCCGACGT-1 3138 7228 1  
Donor2-TCGCGTTAGCTGTTCA-1 2194 13521 7  
Donor2-TCGCGTTTCCGCGTTT-1 2341 15491 8  
Donor2-TCGCGTTTCTGCTTGC-1 8876 58979 6  
Donor2-TCGGGACAGTTCGCAT-1 1572 5913 8  
Donor2-TCGGGACGTCCGTGAC-1 1925 11196 8  
Donor2-TCGGGACGTGTTCTTT-1 2946 14027 7  
Donor2-TCGGGACTCGCAAAC-1 6000 23683 5  
Donor2-TCGTACCCAGGTGCCT-1 2584 8292 11  
Donor2-TCGTACCGTAGGACAC-1 4896 18795 2  
Donor2-TCGTACCGTTTCGCTC-1 2549 8188 11  
Donor2-TCGTAGACATGCCTTC-1 2037 8168 9  
Donor2-TCGTAGAGTCTAACGT-1 5532 19307 5

Donor2-TCGTAGAGTTTGTGG-1 1841 7710 7  
Donor2-TCTATTGGTCATGCAT-1 2692 6702 6  
Donor2-TCTATTGTTCGCGGATC-1 2202 10236 8  
Donor2-TCTATTGTCTAACGGT-1 3094 12905 10  
Donor2-TCTCATATCAGCACAT-1 6549 54674 10  
Donor2-TCTCATATCTGGTGTA-1 4902 16380 5  
Donor2-TCTCTAAAGCCGATTT-1 2674 5795 6  
Donor2-TCTCTAAAGCTAGCCC-1 1741 9934 8  
Donor2-TCTCTAAAGTGAACAT-1 1622 7604 8  
Donor2-TCTCTAAGTTACGACT-1 5210 48791 7  
Donor2-TCTGAGACACGCCAGT-1 2308 11097 9  
Donor2-TCTGAGACATGACATC-1 1584 5593 8  
Donor2-TCTGGAACATAAAGGT-1 2100 11300 8  
Donor2-TCTGGAACATACTACG-1 3941 10837 3  
Donor2-TCTTCGGAGACTAGAT-1 3586 9301 4  
Donor2-TCTTCGGAGCAGCCTC-1 4286 15556 6  
Donor2-TCTTCGGCATTCTTAC-1 2657 21362 8  
Donor2-TCTTCGGTCGTCCAGG-1 4967 28089 7  
Donor2-TCTTTCCAGATATGCA-1 1707 5419 13  
Donor2-TCTTTCCCTCTCGCTTG-1 2251 12201 8  
Donor2-TGAAAGAAGCAGGTCA-1 2010 6362 13  
Donor2-TGAAAGAAGGACAGAA-1 3909 9233 6  
Donor2-TGACAACCAGTTCATG-1 2116 12399 7  
Donor2-TGACGGCCAGCGTTCG-1 4248 11523 2  
Donor2-TGACGGCTCAGTTGAC-1 2563 7024 11  
Donor2-TGACGGCTCCACGTGG-1 2582 10813 13  
Donor2-TGACTAGAGCCAACAG-1 1684 5517 13  
Donor2-TGACTAGAGGCTAGGT-1 1619 5696 8  
Donor2-TGACTAGCATTCCCTCG-1 2099 7469 9  
Donor2-TGACTAGGTAAGCACG-1 3025 9390 8  
Donor2-TGACTAGGTACCGGCT-1 6912 28697 1  
Donor2-TGACTAGTCTTTACAC-1 3142 6828 3  
Donor2-TGACTTTTAGGTTCCCTA-1 3465 7904 3  
Donor2-TGACTTTGTGATGATA-1 3562 23914 7  
Donor2-TGAGAGGAGGAGCGAG-1 6613 28537 1  
Donor2-TGAGAGGGTAAATACG-1 6350 32572 6  
Donor2-TGAGAGGTCTTACCGC-1 4075 12304 4  
Donor2-TGAGAGGTCTTCTGGC-1 5877 21912 5  
Donor2-TGAGCATTCCGCCAGCA-1 3485 8622 1  
Donor2-TGAGGGAAGTGTTAGA-1 6560 36419 6  
Donor2-TGAGGGACAGGTCTCG-1 2588 10504 9  
Donor2-TGAGGGACATCCCACT-1 2391 6669 13  
Donor2-TGAGGGATCCTATGTT-1 2121 6371 11  
Donor2-TGATTTCCAATGAATG-1 7151 35459 6  
Donor2-TGCACCTAGTTTCCTT-1 2727 9565 13  
Donor2-TGCACCTCAAAGTCAA-1 2359 6959 8  
Donor2-TGCACCTCACAGTCGC-1 1704 6942 7  
Donor2-TGCACCTGTACAGTTC-1 4783 16971 5  
Donor2-TGCACCTTCACTTACT-1 6435 27284 1  
Donor2-TGCCAAACAGACAAAT-1 6607 28996 5  
Donor2-TGCCAAACATCGATGT-1 1520 5574 8  
Donor2-TGCCAAAGTCTTCGTC-1 1761 5764 13  
Donor2-TGCCAAATCCGTTGTC-1 6050 47246 6  
Donor2-TGCCCATCACAGACTT-1 1289 5921 8  
Donor2-TGCCCATGTCCCTACT-1 1199 5633 8  
Donor2-TGCCCATTCGAGCCA-1 2801 5423 4



|                            |      |       |    |
|----------------------------|------|-------|----|
| Donor2-TGCCCTAAGGATTCGG-1  | 4740 | 12817 | 5  |
| Donor2-TGCCCTAAGTACACCT-1  | 2114 | 5427  | 9  |
| Donor2-TGCGCAGCATCGATGT-1  | 2588 | 8627  | 11 |
| Donor2-TGCGCAGGTCCTGCTT-1  | 6566 | 32145 | 6  |
| Donor2-TGCGGGTCACATGGGA-1  | 4404 | 13638 | 2  |
| Donor2-TGCGGGTGTCTCCCTA-1  | 2519 | 8557  | 7  |
| Donor2-TGCGGGTTCCTTTCTC-1  | 5793 | 20295 | 5  |
| Donor2-TGCGTGGGTCTCCCTA-1  | 6215 | 21476 | 5  |
| Donor2-TGCGTGGGTGGTCTCG-1  | 1459 | 5445  | 7  |
| Donor2-TGCGTGGGTTGAGTTC-1  | 1993 | 7481  | 13 |
| Donor2-TGCGTGGTCTACTATC-1  | 1936 | 10742 | 8  |
| Donor2-TGCTACCAGACATAAC-1  | 6183 | 22718 | 4  |
| Donor2-TGCTACCAGCCGGTAA-1  | 7566 | 66795 | 5  |
| Donor2-TGCTACCCAAACCTAC-1  | 5197 | 17128 | 4  |
| Donor2-TGCTACCCAAACGTGG-1  | 3190 | 7824  | 2  |
| Donor2-TGCTGCTTCGTTACAG-1  | 2537 | 8057  | 11 |
| Donor2-TGCTGCTTCTAACTCT-1  | 4802 | 13262 | 1  |
| Donor2-TGGCCAGAGGACTGGT-1  | 3686 | 13268 | 6  |
| Donor2-TGGCCAGAGTCGCCGT-1  | 2561 | 9874  | 6  |
| Donor2-TGGCGCAAGTCTCCTC-1  | 1839 | 6076  | 9  |
| Donor2-TGGCGCACAAAGGACTG-1 | 1669 | 8270  | 8  |
| Donor2-TGGCGCATCACTCTTA-1  | 1983 | 7160  | 9  |
| Donor2-TGGCTGGAGCGTAGTG-1  | 3638 | 8415  | 6  |
| Donor2-TGGCTGGTCGGAAACG-1  | 4961 | 28357 | 6  |
| Donor2-TGGGAAGAGGGATCTG-1  | 7564 | 40842 | 6  |
| Donor2-TGGGAAGGTACATCCA-1  | 2355 | 8984  | 8  |
| Donor2-TGGGAAGGTCCAGTGC-1  | 2526 | 7643  | 13 |
| Donor2-TGGGAAGTCCGTCAA-1   | 1763 | 8135  | 7  |
| Donor2-TGGGCGTAGTACCGGA-1  | 1945 | 7570  | 10 |
| Donor2-TGGGCGTGTCTCTCGT-1  | 2099 | 8907  | 9  |
| Donor2-TGGGCGTGTTCGCTAA-1  | 2247 | 8924  | 6  |
| Donor2-TGGTTAGGTACGCTGC-1  | 2697 | 9832  | 13 |
| Donor2-TGGTTAGTCAGGTTCA-1  | 8746 | 64464 | 6  |
| Donor2-TGGTTCCGTCATGCCG-1  | 2818 | 9455  | 13 |
| Donor2-TGTATTTCGTAAGGATT-1 | 2660 | 8888  | 11 |
| Donor2-TGTCCCATCACGCATA-1  | 2233 | 9216  | 9  |
| Donor2-TGTGGTATCGCAAGCC-1  | 2193 | 8674  | 7  |
| Donor2-TTAACTCAGCTAGTGG-1  | 1692 | 5521  | 13 |
| Donor2-TTAACTCTCATATCGG-1  | 3173 | 6938  | 3  |
| Donor2-TTAGGACAGTCTTGCA-1  | 3908 | 9735  | 2  |
| Donor2-TTAGGACTCTTCGGTC-1  | 1570 | 5726  | 13 |
| Donor2-TTAGTTCAGAGCCTAG-1  | 1970 | 8078  | 8  |
| Donor2-TTAGTTCAGGGAACGG-1  | 2310 | 7377  | 6  |
| Donor2-TTAGTTCACGGCTAC-1   | 2205 | 11410 | 7  |
| Donor2-TTAGTTCAGCCTTGG-1   | 5904 | 22095 | 5  |
| Donor2-TTAGTTCATAGCAC-1    | 5120 | 16018 | 4  |
| Donor2-TTATGCTGTAGGCATG-1  | 3040 | 15834 | 7  |
| Donor2-TTCCCAGAGAGTCTGG-1  | 1605 | 8488  | 8  |
| Donor2-TTCCCAGAGCAATCTC-1  | 2239 | 12322 | 7  |
| Donor2-TTCCCAGCAATCTGCA-1  | 1702 | 6623  | 7  |
| Donor2-TTCGAAGAGAAAGTGG-1  | 3103 | 8556  | 2  |
| Donor2-TTCGGTCAGCTAACTC-1  | 1882 | 6615  | 9  |
| Donor2-TTCGGTCAGGACATTA-1  | 2940 | 18125 | 7  |
| Donor2-TTCGGTCGTCCAGTTA-1  | 1776 | 6560  | 13 |
| Donor2-TTCGGTCGTTGTCGCG-1  | 1871 | 14322 | 8  |
| Donor2-TTCTACAAGCCGCCTA-1  | 2643 | 7504  | 11 |

|                            |      |       |    |
|----------------------------|------|-------|----|
| Donor2-TTCTACAGTCCAAGTT-1  | 2558 | 6677  | 11 |
| Donor2-TTCTCAAAGTCCTCCT-1  | 2288 | 6857  | 11 |
| Donor2-TTCTCAACAGACACTT-1  | 3600 | 8216  | 5  |
| Donor2-TTCTCCTCATATACCG-1  | 5922 | 18784 | 3  |
| Donor2-TTCTTAGGTACGCACC-1  | 7996 | 43520 | 5  |
| Donor2-TTCTTAGGTTCCGGCA-1  | 1447 | 5957  | 8  |
| Donor2-TTGAACGCACCAACCG-1  | 3924 | 20522 | 7  |
| Donor2-TTGAACGCATACGCCG-1  | 3010 | 11903 | 6  |
| Donor2-TTGAACGCATCAGTAC-1  | 2114 | 7463  | 13 |
| Donor2-TTGAACGGTATGAATG-1  | 1892 | 7669  | 9  |
| Donor2-TTGACTTCAAGTAATG-1  | 4852 | 25640 | 11 |
| Donor2-TTGACTTTCACCATAG-1  | 6255 | 32788 | 6  |
| Donor2-TTGACTTTCCCAACGG-1  | 4401 | 11525 | 2  |
| Donor2-TTGCCGTCACCGAATT-1  | 2123 | 5877  | 11 |
| Donor2-TTGCCGTCAGCTCCGA-1  | 6138 | 22121 | 5  |
| Donor2-TTGCCGTTCCGGCACA-1  | 4108 | 10688 | 2  |
| Donor2-TTGGAACGTTACGACT-1  | 1535 | 5588  | 8  |
| Donor2-TTGTAGGTCAGTTTGG-1  | 3561 | 17724 | 7  |
| Donor2-TTGTAGGTCCTTAATC-1  | 2272 | 16771 | 8  |
| Donor2-TTTACTGGTCCCTACT-1  | 2433 | 7314  | 11 |
| Donor2-TTTACTGTCCGACAAG-1  | 2269 | 6721  | 11 |
| Donor2-TTTATGCGTCCGTCAG-1  | 3287 | 8269  | 8  |
| Donor2-TTTATGCTCTGTGCAA-1  | 1421 | 5904  | 8  |
| Donor2-TTTCCTCCAAGGTGTG-1  | 2434 | 10210 | 9  |
| Donor2-TTTCCTCCACCCATTC-1  | 1669 | 5913  | 7  |
| Donor2-TTTGCGCAGGTTACCT-1  | 4874 | 18279 | 5  |
| Donor2-TTTGCGCAGTGGTAAT-1  | 1333 | 5649  | 8  |
| Donor2-TTTGGTTCATGAAGTA-1  | 1707 | 9314  | 8  |
| Donor2-TTTGTCAAGTCTTGCA-1  | 1905 | 7673  | 7  |
| Donor2-TTTGTCACAAACGTGG-1  | 5333 | 21715 | 1  |
| Donor2-TTTGTACAGCCAGAA-1   | 2236 | 6542  | 11 |
| Donor2-TTTGTACAGTTCGTCTC-1 | 5430 | 19233 | 1  |
| Donor2-TTTGTACATCACCAGGC-1 | 3081 | 6924  | 4  |
| Donor2-TTTGTACATCGTAGATC-1 | 1980 | 6620  | 13 |
| Donor2-TTTGTACATCTTCAACT-1 | 2180 | 7194  | 13 |
| Donor2-AAACGGGAGGTGATTA-2  | 1760 | 9586  | 8  |
| Donor2-AAACGGGCACTCTGTC-2  | 4966 | 17736 | 6  |
| Donor2-AAACGGGGTCATATGC-2  | 2043 | 6099  | 10 |
| Donor2-AAACGGGGTTTACTCT-2  | 9465 | 85342 | 6  |
| Donor2-AAAGATGCATGTCTCC-2  | 5822 | 22092 | 1  |
| Donor2-AAAGATGTCAGCAACT-2  | 1709 | 6620  | 7  |
| Donor2-AAAGATGTCGTTACGA-2  | 6729 | 30329 | 5  |
| Donor2-AAAGCAAGTAAAGGAG-2  | 4165 | 22120 | 6  |
| Donor2-AAAGCAAGTACCATCA-2  | 3657 | 9384  | 1  |
| Donor2-AAAGCAATCACTTCAT-2  | 5050 | 15801 | 1  |
| Donor2-AAAGTAGAGCTCCTCT-2  | 3652 | 13936 | 11 |
| Donor2-AAAGTAGGTTTCGTGAT-2 | 6115 | 23564 | 6  |
| Donor2-AAAGTAGTCATGCTCC-2  | 2051 | 8276  | 9  |
| Donor2-AAATGCCTCATGTCTT-2  | 4725 | 14366 | 3  |
| Donor2-AACACGTCAGACTCGC-2  | 5481 | 18630 | 6  |
| Donor2-AACCATGAGACTAGAT-2  | 3217 | 7584  | 3  |
| Donor2-AACCATGAGCGATATA-2  | 3026 | 6862  | 4  |
| Donor2-AACCATGAGGAATTAC-2  | 1878 | 6368  | 9  |
| Donor2-AACCATGCAAATTGCC-2  | 1596 | 8319  | 8  |
| Donor2-AACCGCGAGCTGTTCA-2  | 4655 | 27867 | 6  |
| Donor2-AACCGCGGTTACCTC-2   | 7017 | 54674 | 5  |

Donor2-AACCGCGTCGGTCCGA-2 4173 11290 6  
Donor2-AACGTTGAGCGTCTAT-2 3484 18960 7  
Donor2-AACTCAGAGGGCACTA-2 4056 23938 7  
Donor2-AACTCAGAGGTAGCCA-2 4298 11466 3  
Donor2-AACTCAGGTACAGACG-2 3691 21468 7  
Donor2-AACTCAGTCCGAACGC-2 6651 51399 6  
Donor2-AACTCCCAGGAGCGTT-2 6460 35105 4  
Donor2-AACTCCCAGTAGCCGA-2 2182 6088 11  
Donor2-AACTCCCGTTGTCGCG-2 3148 19220 7  
Donor2-AACTCCCTCTTGCATT-2 7645 57323 6  
Donor2-AACTCTTTCTGTTTGT-2 5359 34189 6  
Donor2-AACTGGTCATAACCATG-2 1991 8659 7  
Donor2-AACTGGTGTAGCTTGT-2 1989 5744 13  
Donor2-AACTGGTGTCTCTTAT-2 2282 14939 7  
Donor2-AACTTTCAGTGGGCTA-2 1806 6300 9  
Donor2-AACTTTCAGACAAAT-2 6232 39604 6  
Donor2-AAGACCTAGACCGGAT-2 2071 12318 7  
Donor2-AAGACCTAGTGAATTG-2 6114 28365 6  
Donor2-AAGACCTGTAAATACG-2 4931 28243 11  
Donor2-AAGGAGCGTGCAGGTA-2 4369 13621 5  
Donor2-AAGGCAGGTGTTTGTG-2 5876 20726 1  
Donor2-AAGGTTCCACTGCCAG-2 1688 6667 13  
Donor2-AAGTCTGAGCTGAACG-2 3794 10077 1  
Donor2-AAGTCTGAGTCATGCT-2 5760 22686 6  
Donor2-AAGTCTGTCCGCAAGC-2 3218 13084 11  
Donor2-AATCCAGGTCGCGTGT-2 2777 5994 3  
Donor2-AATCCAGTCCGCTGTT-2 5543 19413 1  
Donor2-AATCCAGTCTGCGTAA-2 1571 8246 8  
Donor2-AATCGGTAGTACGTAA-2 3611 7681 5  
Donor2-AATCGGTTCTTCGAGA-2 5760 28366 6  
Donor2-ACACCAAGTTTAAGCC-2 2272 9890 9  
Donor2-ACACCCTAGATGCGAC-2 1544 8143 8  
Donor2-ACACCCTCATGTAAGA-2 2334 6837 13  
Donor2-ACACCCTGTAATTGGA-2 5277 18651 5  
Donor2-ACACCGGCACATGACT-2 4186 27003 6  
Donor2-ACACCGGTCAAGCGA-2 2144 6970 11  
Donor2-ACACCGGTCCATCCT-2 3481 10920 12  
Donor2-ACACCGGTGCAACGA-2 2084 7114 13  
Donor2-ACACCGGTCGAGAACG-2 1485 7931 8  
Donor2-ACACCGGTCGCATGAT-2 4036 9387 3  
Donor2-ACACTGAAGAGTAAGG-2 1295 5780 8  
Donor2-ACACTGAAGCTCTCGG-2 3945 14207 11  
Donor2-ACACTGATCAGTACGT-2 2086 7641 9  
Donor2-ACAGCCGAGTGGCACA-2 7372 42439 6  
Donor2-ACAGCCGGTCGCATCG-2 1272 6283 8  
Donor2-ACAGCTAAGCTAGGCA-2 3714 22609 6  
Donor2-ACAGCTATCCCTCAGT-2 3200 17299 7  
Donor2-ACAGCTATCCTGCCAT-2 3977 9514 6  
Donor2-ACATACGAGACTACAA-2 1807 8002 7  
Donor2-ACATACGAGAGTGACC-2 4112 16021 6  
Donor2-ACATACGAGCCACCTG-2 2456 16660 8  
Donor2-ACATACGAGGCCCGTT-2 5427 17352 2  
Donor2-ACATACGCAGCTCGCA-2 1765 8464 7  
Donor2-ACATCAGCAGTGGGAT-2 6065 28785 4  
Donor2-ACATCAGTCGTACCGG-2 3328 12174 11  
Donor2-ACATCAGTCTGGTGTA-2 3012 16386 7

Donor2-ACATGGTGTCCGAAGA-2 1819 6813 9  
Donor2-ACCAGTAAGACTGTAA-2 3313 10864 11  
Donor2-ACCAGTATCGGTTCGG-2 3863 12582 11  
Donor2-ACCCACTTCAGTTGAC-2 2063 6310 13  
Donor2-ACCGTAAAGTGTACTC-2 1472 7752 8  
Donor2-ACCGTAATCTCCCTGA-2 2920 18341 7  
Donor2-ACCTTTAGTGTTCGAT-2 1776 5999 9  
Donor2-ACGAGGACATGTTCGAT-2 2374 18981 8  
Donor2-ACGAGGAGTCAAAGAT-2 5787 25826 6  
Donor2-ACGAGGAGTGATGCC-2 2137 8779 7  
Donor2-ACGAGGATCACGGTTA-2 8498 54651 5  
Donor2-ACGAGGATCCTGTACC-2 1961 6028 11  
Donor2-ACGATACGTAGGCTGA-2 1746 5710 13  
Donor2-ACGATGTAGACCACGA-2 1666 5970 13  
Donor2-ACGATGTCAGTTCATG-2 4205 16191 11  
Donor2-ACGATGTGTAGCTAAA-2 1810 10588 8  
Donor2-ACGATGTTTCATGCTCC-2 3567 17030 6  
Donor2-ACGCCAGAGAGCAATT-2 4574 20714 6  
Donor2-ACGCCAGAGATCGGGT-2 1783 6405 9  
Donor2-ACGCCAGCAGTCGTGC-2 2890 13813 7  
Donor2-ACGCCAGCATTACGAC-2 3278 7957 3  
Donor2-ACGCCAGTCAACCATG-2 3402 31820 8  
Donor2-ACGCCGAAGGTGCAAC-2 2237 6109 10  
Donor2-ACGGAGACATGCCACG-2 6393 26358 5  
Donor2-ACGGAGACATGCTAGT-2 3859 26770 7  
Donor2-ACGGAGATCAACACCA-2 5483 18303 6  
Donor2-ACGGCCAAGCCACGCT-2 4412 12374 5  
Donor2-ACGGGTCAGAGTAATC-2 5810 22345 2  
Donor2-ACGTCAACATGGTCTA-2 3174 12841 8  
Donor2-ACGTCAAGTTAGGGTG-2 4333 13181 1  
Donor2-ACGTCAATCAACACCA-2 1359 6238 8  
Donor2-ACGTCAATCCATGAGT-2 3414 18015 7  
Donor2-ACTATCTGTAACGCGA-2 4998 15349 5  
Donor2-ACTATCTGTTTCCACC-2 5158 16994 6  
Donor2-ACTGAACCAAGCCGTC-2 1824 8431 7  
Donor2-ACTGAACCACAGATTC-2 6653 28479 1  
Donor2-ACTGAGTGTAGGCTGA-2 3467 9026 6  
Donor2-ACTGAGTGTGCAACGA-2 3307 7496 5  
Donor2-ACTGAGTTCAGAGCTT-2 5639 17674 5  
Donor2-ACTGATGAGCACACAG-2 1656 7930 8  
Donor2-ACTGATGAGCCAACAG-2 6800 30063 5  
Donor2-ACTGCTCTCCATGAGT-2 2702 14613 7  
Donor2-ACTTACTAGGAATTAC-2 5705 19457 1  
Donor2-ACTTACTCAGGACCCT-2 3146 7480 3  
Donor2-ACTTACTTCAGTTAGC-2 3739 16641 6  
Donor2-ACTTACTTCTTACCGC-2 2998 9485 11  
Donor2-ACTTGTTCAAGCGCTC-2 5164 18218 2  
Donor2-ACTTGTTTCATTAGGCT-2 7141 34599 1  
Donor2-ACTTTCACAGACGCTC-2 3266 21173 7  
Donor2-ACTTTCATCCTGCCAT-2 7048 44599 4  
Donor2-ACTTTCATCTGCTGTC-2 2057 6101 13  
Donor2-ACTTTCATCTTGACGA-2 2359 10059 9  
Donor2-AGACGTTTCGTAGATC-2 7143 46189 6  
Donor2-AGAGCGACATTGGCGC-2 3449 24856 7  
Donor2-AGAGCTTAGCGATTCT-2 6456 50459 6  
Donor2-AGAGCTTAGTCGTA-2 4261 22222 10

Donor2-AGAGCTTTCAGATAAG-2 3606 23437 7  
Donor2-AGAGTGGAGAGGTAGA-2 1715 9972 8  
Donor2-AGAGTGGAGCGTCTAT-2 6700 29600 5  
Donor2-AGAGTGGAGCTGTTCA-2 6559 29293 5  
Donor2-AGAGTGGAGTCTCCTC-2 2690 5893 3  
Donor2-AGAGTGGTCACTCCTG-2 3328 11576 11  
Donor2-AGATCTGAGTTCGCGC-2 2207 5691 11  
Donor2-AGATTGCCACCCAGTG-2 2486 9336 10  
Donor2-AGATTGCCACTAGTAC-2 1735 9276 7  
Donor2-AGATTGCCATTAGCCA-2 1995 6857 13  
Donor2-AGATTGCGTACCCAAT-2 3976 21335 6  
Donor2-AGATTGCTCACCCACT-2 6427 27400 5  
Donor2-AGATTGCTCGGAATCT-2 2072 7562 9  
Donor2-AGATTGCTCTGCGACG-2 2307 8990 9  
Donor2-AGCAGCCCACCTGGTG-2 2062 7433 13  
Donor2-AGCAGCCCATCACGTA-2 5258 16308 6  
Donor2-AGCAGCCTCTAACTCT-2 2764 6046 2  
Donor2-AGCATACAGAGGGCTT-2 2784 14589 7  
Donor2-AGCATACGTATCACCA-2 6081 27918 6  
Donor2-AGCGTATCATATGCTG-2 1327 5946 8  
Donor2-AGCGTATTCAGTGCAT-2 3611 8611 3  
Donor2-AGCGTATTCGCTTGTC-2 4774 27473 6  
Donor2-AGCGTATTCTAACCGA-2 6927 38153 5  
Donor2-AGCGTATTCTCAACTT-2 3150 6430 5  
Donor2-AGCGTCGCAAGCTGTT-2 3691 21130 7  
Donor2-AGCGTCGCAATGGATA-2 5478 20560 1  
Donor2-AGCGTCGCAGCTGTTA-2 1692 5721 13  
Donor2-AGCTCCTAGGATTCGG-2 2751 13442 7  
Donor2-AGCTCCTCATGGTCAT-2 5834 49131 6  
Donor2-AGCTCCTGTCACAAGG-2 5358 15194 1  
Donor2-AGCTCCTGTCTGATCA-2 2024 5826 6  
Donor2-AGCTCTCGTGTGTGCC-2 5824 25110 6  
Donor2-AGCTCTCTCATCTGTT-2 4191 18524 6  
Donor2-AGGCCACAGTCAAGCG-2 3204 6979 2  
Donor2-AGGCCACCACGTGAGA-2 1746 6382 13  
Donor2-AGGCCACCATCGGTTA-2 3966 10830 6  
Donor2-AGGCCGTGTGTTGGGA-2 4006 10919 4  
Donor2-AGGCCGTTCGCTTAGA-2 5781 36939 10  
Donor2-AGGGAGTGTTCTCCA-2 6380 27143 5  
Donor2-AGGGATGAGATAGGAG-2 1916 12479 8  
Donor2-AGGGATGCAGTATCTG-2 3253 7365 3  
Donor2-AGGGATGTCGATGAGG-2 4665 15517 6  
Donor2-AGGGTGAAGGGCTTGA-2 3946 9775 6  
Donor2-AGGGTGAAGTGAAGAG-2 3823 9368 3  
Donor2-AGGGTGACACTCAGGC-2 2250 6411 10  
Donor2-AGGGTGATCCTCAACC-2 2575 11010 10  
Donor2-AGGTCATCATTCACTT-2 4851 14458 6  
Donor2-AGGTCCGAGAGCTGGT-2 6394 31255 1  
Donor2-AGGTCCGCATTCTCAT-2 2464 11734 7  
Donor2-AGGTCCGGTTACTGAC-2 1390 5766 8  
Donor2-AGGTCCGTCAACACGT-2 1951 8188 10  
Donor2-AGGTCCGTCCGAGCCA-2 3107 16762 7  
Donor2-AGTGAGGAGAGGTAGA-2 2285 9739 12  
Donor2-AGTGGGAAGACACGAC-2 2169 7845 13  
Donor2-AGTGGGACAAACCTAC-2 3382 20533 7  
Donor2-AGTGGGACATCCAACA-2 1802 8721 8

Donor2-AGTGTCAAGATAGCAT-2 5455 21190 6  
Donor2-AGTGTCAAGTAAGTAC-2 2237 8773 7  
Donor2-AGTGTCATCCAAATGC-2 7173 50494 6  
Donor2-AGTGTCATCGTTGCCT-2 1786 6329 13  
Donor2-AGTTGGTAGCACCGTC-2 5258 18805 2  
Donor2-AGTTGGTGTGTAACGG-2 1766 7297 7  
Donor2-ATAACGCAGTTGTAGA-2 3331 16950 6  
Donor2-ATAAGAGTCCTTAATC-2 2972 8967 5  
Donor2-ATAGACCAGAAGATTC-2 1667 7040 13  
Donor2-ATCACGACAGGTGGAT-2 2279 9034 7  
Donor2-ATCACGAGTATCAGTC-2 2471 7103 11  
Donor2-ATCACGATCATCATTC-2 2294 13724 8  
Donor2-ATCACGATCCAAGTAC-2 5418 34896 10  
Donor2-ATCATCTCAAGGACAC-2 2386 14156 8  
Donor2-ATCATCTGTCGTCTTC-2 5495 21115 6  
Donor2-ATCATGGAGCACCGCT-2 4004 10021 5  
Donor2-ATCATGGCATAACGCCG-2 3720 17748 6  
Donor2-ATCATGGGTCACTGGC-2 2457 7191 13  
Donor2-ATCATGGTCTTGCAAG-2 2334 7123 11  
Donor2-ATCCGAAGTGGTACAG-2 2611 9354 10  
Donor2-ATCGAGTTCGGAAACG-2 1815 11029 8  
Donor2-ATCTACTAGATCCGAG-2 3183 7199 3  
Donor2-ATCTGCCAGATAGCAT-2 3908 9573 5  
Donor2-ATGAGGGAGGGCTTGA-2 3257 18980 7  
Donor2-ATGCGATAGCACCGCT-2 2842 13812 7  
Donor2-ATGCGATAGGCCCTTG-2 6842 31484 5  
Donor2-ATGCGATGTCACCCAG-2 6267 28221 5  
Donor2-ATGGGAGTCACTCTTA-2 2338 7251 11  
Donor2-ATGTGTGCATCCGTGG-2 1711 8830 7  
Donor2-ATGTGTGGTCCAGTGC-2 1889 6863 9  
Donor2-ATGTGTGGTGTATGGG-2 1997 7702 9  
Donor2-ATGTGTGTCGATGAGG-2 9801 94670 6  
Donor2-ATTACTCAGTACGACG-2 7042 35628 5  
Donor2-ATTACTCCACGCCAGT-2 1368 5687 8  
Donor2-ATTACTCCAGTAAGAT-2 1584 8968 8  
Donor2-ATTACTCGTACGAAAT-2 5907 27144 4  
Donor2-ATTATCCGTACCCAAT-2 5755 17334 4  
Donor2-ATTATCCGTCAGATAA-2 4503 16258 6  
Donor2-ATTATCCGTTCCGTCT-2 3252 12036 13  
Donor2-ATTCTACAGATAGGAG-2 1313 7256 8  
Donor2-ATTCTACCACTTAACG-2 3276 17523 6  
Donor2-ATTGGACAGTGTCCCG-2 1973 6532 9  
Donor2-ATTTCTGAGGTGTGGT-2 2031 10133 7  
Donor2-ATTTCTGAGTCTTGCA-2 1899 6835 8  
Donor2-ATTTCTGCACATGACT-2 4827 14545 4  
Donor2-ATTTCTGTCTAACTGG-2 5322 17771 5  
Donor2-CAACCAAAGTAGCGGT-2 1587 5873 13  
Donor2-CAACCAAGTATAGTAG-2 2005 6389 13  
Donor2-CAACCAAGTCGAAAGC-2 3224 16784 7  
Donor2-CAACCTCCAGGTGGAT-2 2254 6903 6  
Donor2-CAACTAGAGATCCCAT-2 2332 7231 6  
Donor2-CAACTAGGTATAGGGC-2 3965 13766 11  
Donor2-CAAGAAAGTCCGTTAA-2 8183 54694 5  
Donor2-CAAGATCTCAGTTCGA-2 6916 30335 1  
Donor2-CAAGTTGCAAGTTCTG-2 3791 31818 7  
Donor2-CAAGTTGCAGGACGTA-2 1848 7343 8

Donor2-CAAGTTGGTCCGCTGA-2 3788 10646 2  
Donor2-CAAGTTGTCCACGTGG-2 2491 8097 13  
Donor2-CACAAACAGTGGAGTC-2 2889 11411 7  
Donor2-CACAAACGTAGTAGTA-2 3470 7959 1  
Donor2-CACACAAAGGATTCGG-2 2455 8079 8  
Donor2-CACACAAAGTCGTA-2 4342 12782 1  
Donor2-CACACAAGTCCTAGCG-2 1821 7705 7  
Donor2-CACACCTGTTAAGATG-2 6489 46629 10  
Donor2-CACACTCGTACAAGTA-2 3186 14688 6  
Donor2-CACAGGCAGCTCTCGG-2 4035 11063 3  
Donor2-CACAGGCCATGGTCAT-2 3647 12608 11  
Donor2-CACCAGGAGTGTGAAT-2 7423 37953 5  
Donor2-CACCTTGCACATCCAA-2 2628 16210 7  
Donor2-CACCTTGGTGATGATA-2 4891 31171 10  
Donor2-CACTCCATCAACGGGA-2 4223 16648 6  
Donor2-CACTCCATCAGAGCTT-2 4017 21313 10  
Donor2-CACTCCATCGAATGCT-2 2948 9987 11  
Donor2-CAGAATCGTGCTCTTC-2 7594 49183 6  
Donor2-CAGAATCTCGGCCGAT-2 1416 5768 13  
Donor2-CAGAGAGAGCTGCGAA-2 2969 15594 7  
Donor2-CAGAGAGCACATGTGT-2 6191 33555 5  
Donor2-CAGATCAAGCCAGGAT-2 6951 41285 4  
Donor2-CAGATCAGTGTGGTTT-2 1501 7014 8  
Donor2-CAGATCAGTTACCGAT-2 1863 5975 13  
Donor2-CAGATCATCTACGAGT-2 3633 18327 10  
Donor2-CAGCAGCCACAGAGGT-2 3185 7565 5  
Donor2-CAGCAGCTCACCAGGC-2 9177 150014 5  
Donor2-CAGCATAAGTCATGCT-2 5067 27020 6  
Donor2-CAGCATAACAGGCAGTA-2 2449 7125 13  
Donor2-CAGCATATCCGTTGTC-2 2044 5755 13  
Donor2-CAGCCGAAGGACAGAA-2 6019 25223 6  
Donor2-CAGCCGATCGCGGATC-2 2407 8969 13  
Donor2-CAGCGACAGCACCGTC-2 2784 8457 8  
Donor2-CAGCGACCACTAAGTC-2 6561 27795 1  
Donor2-CAGCGACGTCGCGTGT-2 5488 20103 6  
Donor2-CAGCGACTCATAGCAC-2 3269 17117 7  
Donor2-CAGCGACTCATTGCGA-2 2715 11360 9  
Donor2-CAGCTAACAGTCGATT-2 1953 12282 8  
Donor2-CAGCTAACATTTTCAGG-2 1477 5927 13  
Donor2-CAGCTGGCATATAACCG-2 5241 17925 1  
Donor2-CAGCTGGGTTATCCGA-2 5052 29440 10  
Donor2-CAGCTGGTCCCAGGTG-2 1553 7756 8  
Donor2-CAGGTGCAGCTGCCCA-2 6056 25952 6  
Donor2-CAGGTGCAGGGCACTA-2 2106 6417 11  
Donor2-CAGGTGCCACGCTTTC-2 2369 13105 8  
Donor2-CAGGTGCTCTATCCCG-2 1923 10187 7  
Donor2-CAGGTGCTCTGTTTGT-2 1997 11766 7  
Donor2-CAGTAACCACCGCTAG-2 1728 5859 13  
Donor2-CAGTCCTAGCGATGAC-2 4818 14256 6  
Donor2-CAGTCCTAGTGCCATT-2 4225 12563 4  
Donor2-CAGTCCTCACTTCTGC-2 3120 9457 4  
Donor2-CAGTCCTGTGCGAAAC-2 2172 6201 13  
Donor2-CATATGGCACGTCAGC-2 1799 11580 8  
Donor2-CATATTCCATATAACCG-2 1730 10197 8  
Donor2-CATCAAGAGAACAAC-2 7979 58543 4  
Donor2-CATCAAGCAAACCTAC-2 2908 10240 8

|                            |      |       |    |
|----------------------------|------|-------|----|
| Donor2-CATCAGAAGGAGCGTT-2  | 5251 | 17172 | 5  |
| Donor2-CATCAGATCAAACGGG-2  | 1333 | 5833  | 8  |
| Donor2-CATCCACAGACAGACC-2  | 4196 | 11705 | 4  |
| Donor2-CATCCACCAGGTCCAC-2  | 1831 | 9435  | 7  |
| Donor2-CATCCACCATCACGTA-2  | 2913 | 15540 | 7  |
| Donor2-CATCCACTCAGAGGTG-2  | 6673 | 44452 | 5  |
| Donor2-CATCGAAAGGTGATAT-2  | 5706 | 22319 | 5  |
| Donor2-CATCGAAAGTCACGCC-2  | 6358 | 38024 | 4  |
| Donor2-CATCGAACAGCCTTTC-2  | 1784 | 10722 | 8  |
| Donor2-CATCGAACAGCTGGCT-2  | 5578 | 21073 | 1  |
| Donor2-CATCGAATCCGGGTGT-2  | 4428 | 23855 | 6  |
| Donor2-CATCGAATCGTTGCCT-2  | 7681 | 42913 | 5  |
| Donor2-CATCGAATCTGGGCCA-2  | 1904 | 9189  | 7  |
| Donor2-CATCGGGCAGTCCAG-2   | 1600 | 6152  | 8  |
| Donor2-CATCGGGGTTGATTGC-2  | 4442 | 13400 | 1  |
| Donor2-CATCGGGTCATTTGGG-2  | 2986 | 15661 | 7  |
| Donor2-CATGACAGTTTGACAC-2  | 6507 | 26130 | 1  |
| Donor2-CATGCCTAGCTGCAAG-2  | 9152 | 71414 | 5  |
| Donor2-CATGGCGCATTTGCC-2   | 2129 | 6480  | 13 |
| Donor2-CATGGCGTCACCACCT-2  | 2367 | 12099 | 7  |
| Donor2-CATTATCAGCCTCGTG-2  | 5361 | 37084 | 6  |
| Donor2-CATTATCCAGTTTACG-2  | 1682 | 7664  | 8  |
| Donor2-CATTATCGTAAGCACG-2  | 2000 | 13493 | 8  |
| Donor2-CATTTCGAGTCCATAC-2  | 1702 | 6275  | 13 |
| Donor2-CATTTCGCCAGTATCTG-2 | 1954 | 10292 | 7  |
| Donor2-CCAATCCAGCCAACAG-2  | 3009 | 12125 | 6  |
| Donor2-CCAATCCAGGTAGCTG-2  | 2100 | 7507  | 13 |
| Donor2-CCAATCCAGTGGGCTA-2  | 2024 | 7163  | 6  |
| Donor2-CCAATCCGTTAAAGAC-2  | 3350 | 14330 | 12 |
| Donor2-CCACCTAAGAAGGACA-2  | 3009 | 14423 | 7  |
| Donor2-CCACGGACAGACAAGC-2  | 3366 | 13397 | 11 |
| Donor2-CCACGGATCTCCGGTT-2  | 3434 | 16768 | 7  |
| Donor2-CCACGGATCTGGTATG-2  | 3852 | 16969 | 6  |
| Donor2-CCACTACCAGTGGGAT-2  | 4451 | 18256 | 11 |
| Donor2-CCAGCGAAGACATAAC-2  | 2215 | 7776  | 9  |
| Donor2-CCAGCGAGTAATTGGA-2  | 6310 | 23276 | 5  |
| Donor2-CCAGCGAGTACGCTGC-2  | 2196 | 6633  | 11 |
| Donor2-CCAGCGATCGTCGTT-2   | 6369 | 36788 | 4  |
| Donor2-CCATGTCCAATGGTCT-2  | 4142 | 10809 | 1  |
| Donor2-CCATTCGAGTACACCT-2  | 3058 | 8302  | 11 |
| Donor2-CCATTCGTCAGTTGAC-2  | 6630 | 31464 | 6  |
| Donor2-CCCAATCCACCGTTGG-2  | 3361 | 28588 | 7  |
| Donor2-CCCAATCCAGACAAAT-2  | 3310 | 11965 | 5  |
| Donor2-CCCAATCTCAAACGGG-2  | 1847 | 6492  | 9  |
| Donor2-CCCAGTTGTCTCCATC-2  | 2683 | 5735  | 5  |
| Donor2-CCCAGTTTCAACACGT-2  | 1775 | 6363  | 9  |
| Donor2-CCCATACGTATAGTAG-2  | 2857 | 8703  | 11 |
| Donor2-CCGGGATTCTGGTATG-2  | 5288 | 22446 | 6  |
| Donor2-CCGGTAGAGCACCGCT-2  | 3089 | 16016 | 7  |
| Donor2-CCGGTAGCAAGTTAAG-2  | 1998 | 6603  | 8  |
| Donor2-CCGGTAGGTAAGTTCC-2  | 1786 | 7055  | 13 |
| Donor2-CCGGTAGTCCCATTTA-2  | 1527 | 6274  | 13 |
| Donor2-CCGTACTAGTGTCCCG-2  | 8919 | 71124 | 6  |
| Donor2-CCGTACTAGTGTTCG-2   | 2721 | 23266 | 8  |
| Donor2-CCGTGGAAGCTCCTCT-2  | 4889 | 25354 | 6  |
| Donor2-CCGTGGAGTTCTCATT-2  | 7513 | 46510 | 6  |



|                             |      |       |    |
|-----------------------------|------|-------|----|
| Donor2-CCGTGGATCTTGGGTA-2   | 2819 | 8463  | 10 |
| Donor2-CCGTTCATCGTGACAT-2   | 8386 | 45614 | 5  |
| Donor2-CCTAAAGCACCGATAT-2   | 5022 | 21691 | 6  |
| Donor2-CCTACACAGGCATTGG-2   | 2372 | 15214 | 7  |
| Donor2-CCTACACCACTTGGAT-2   | 5876 | 27436 | 6  |
| Donor2-CCTACCACAAGCGCTC-2   | 6462 | 31815 | 4  |
| Donor2-CCTACCATCAAAGACA-2   | 1754 | 8988  | 7  |
| Donor2-CCTAGCTAGAAGAAGC-2   | 2116 | 8159  | 7  |
| Donor2-CCTAGCTGTTTACTCT-2   | 2078 | 7136  | 9  |
| Donor2-CCTATTACAATAGAGT-2   | 2084 | 9732  | 7  |
| Donor2-CCTCAGTAGACTAGGC-2   | 5569 | 28519 | 5  |
| Donor2-CCTCAGTCATCCTTGC-2   | 2683 | 8299  | 13 |
| Donor2-CCTCAGTCATGTCCTC-2   | 3962 | 15853 | 5  |
| Donor2-CCTCAGTGTCTAGTGT-2   | 5287 | 20132 | 6  |
| Donor2-CCTCTGAAGAACAACACT-2 | 2430 | 8816  | 6  |
| Donor2-CCTCTGATCCTTTCGG-2   | 2418 | 5792  | 4  |
| Donor2-CCTTACGGTCAAAGAT-2   | 2691 | 14091 | 8  |
| Donor2-CCTTCCCAGGGTCGAT-2   | 2773 | 9057  | 11 |
| Donor2-CCTTCCCCAGTAACGG-2   | 2719 | 8629  | 11 |
| Donor2-CCTTCCCCGTCGGGTCT-2  | 4245 | 15134 | 5  |
| Donor2-CCTTCCCCGTGTTTCGAT-2 | 3720 | 9567  | 4  |
| Donor2-CCTTCCCTCAGCAACT-2   | 2310 | 5951  | 4  |
| Donor2-CCTTCGACACCGTTGG-2   | 2817 | 14844 | 7  |
| Donor2-CCTTCGAGTCGAGATG-2   | 4097 | 14963 | 5  |
| Donor2-CCTTCGAGTTCAGACT-2   | 3602 | 15858 | 6  |
| Donor2-CCTTTCTAGATCCCAT-2   | 1557 | 8763  | 8  |
| Donor2-CCTTTCTGTACATGTC-2   | 5546 | 18556 | 5  |
| Donor2-CCTTTCTTCGCTGTT-2    | 2281 | 14561 | 8  |
| Donor2-CCTTTCTTCGTACGGC-2   | 6702 | 30803 | 6  |
| Donor2-CGAACATAGAGGACGG-2   | 2344 | 9716  | 7  |
| Donor2-CGACCTTAGATCTGAA-2   | 4076 | 13676 | 11 |
| Donor2-CGACCTTGTTGTACAC-2   | 2041 | 8343  | 8  |
| Donor2-CGACTTCTCCCATTTA-2   | 3400 | 7625  | 1  |
| Donor2-CGACTTCTCGTGACAT-2   | 5339 | 30937 | 6  |
| Donor2-CGAGAAGAGCAATCTC-2   | 1306 | 6286  | 8  |
| Donor2-CGAGAAGCATCACGAT-2   | 2682 | 12439 | 7  |
| Donor2-CGAGAAGGTGATGTCT-2   | 4177 | 22486 | 7  |
| Donor2-CGAGCCAAGAAACGAG-2   | 2893 | 6796  | 6  |
| Donor2-CGATCGGAGTGTGAA-2    | 7388 | 38444 | 5  |
| Donor2-CGATCGGCATCCTTGC-2   | 4039 | 10167 | 5  |
| Donor2-CGATCGGTCGGTCCGA-2   | 3460 | 8769  | 4  |
| Donor2-CGATGTAAGCCTATGT-2   | 3303 | 12713 | 10 |
| Donor2-CGATGTATCCCTTGTG-2   | 1591 | 6757  | 7  |
| Donor2-CGATTGAAGAATCTCC-2   | 3283 | 14747 | 7  |
| Donor2-CGATTGAAGCCGCCTA-2   | 4661 | 14623 | 6  |
| Donor2-CGATTGACAATCAGAA-2   | 2454 | 7110  | 11 |
| Donor2-CGCCAAGAGCTCTCGG-2   | 1849 | 5655  | 7  |
| Donor2-CGCCAAGAGTTACCCA-2   | 5346 | 16630 | 5  |
| Donor2-CGCGGTAGTCATATGC-2   | 7985 | 55250 | 6  |
| Donor2-CGCGTTTTAGTGTCCCG-2  | 2612 | 13148 | 7  |
| Donor2-CGCGTTTTAGTGTCCCG-2  | 2100 | 12730 | 7  |
| Donor2-CGCGTTTTTCCTTAATC-2  | 5862 | 20592 | 5  |
| Donor2-CGCTATCAGCTGCAAG-2   | 1422 | 7677  | 8  |
| Donor2-CGCTATCCATGCCCGA-2   | 5140 | 17476 | 1  |
| Donor2-CGCTATCGTCCTCTTG-2   | 6226 | 33543 | 4  |
| Donor2-CGCTGGAAGTCGCCGT-2   | 2611 | 11106 | 10 |

|                           |      |       |    |
|---------------------------|------|-------|----|
| Donor2-CGCTGGACAGGATTGG-2 | 3378 | 16901 | 6  |
| Donor2-CGCTGGATCTATCCCG-2 | 2264 | 10456 | 7  |
| Donor2-CGGACACAGTGGAGAA-2 | 1932 | 7535  | 13 |
| Donor2-CGGACACGTGCAGTAG-2 | 3397 | 14196 | 6  |
| Donor2-CGGACGTGTTGTACAC-2 | 2711 | 16084 | 7  |
| Donor2-CGGACTGAGACAGGCT-2 | 4437 | 12390 | 6  |
| Donor2-CGGACTGAGACCCACC-2 | 2667 | 8893  | 10 |
| Donor2-CGGACTGGTATGAATG-2 | 2551 | 9890  | 10 |
| Donor2-CGGACTGGTCCGCTGA-2 | 2721 | 10270 | 11 |
| Donor2-CGGACTGGTCTAAAGA-2 | 2151 | 8722  | 7  |
| Donor2-CGGACTGGTCTAGGTT-2 | 4431 | 12124 | 6  |
| Donor2-CGGACTGTCCTGTAGA-2 | 5123 | 30882 | 5  |
| Donor2-CGGAGCTAGTTAGGTA-2 | 4230 | 10453 | 5  |
| Donor2-CGGAGTCTCTACCAGA-2 | 2667 | 6255  | 2  |
| Donor2-CGGCTAGAGGGAACGG-2 | 7862 | 80128 | 5  |
| Donor2-CGGCTAGAGTCACGCC-2 | 6403 | 28916 | 1  |
| Donor2-CGGCTAGTCAGTACGT-2 | 3788 | 9239  | 1  |
| Donor2-CGGGTCAAGAAACCGC-2 | 1729 | 7590  | 7  |
| Donor2-CGGGTCAAGATGTGTA-2 | 3304 | 22621 | 7  |
| Donor2-CGGGTCAAGGCCCGTT-2 | 3713 | 12638 | 11 |
| Donor2-CGGGTCACATGCAACT-2 | 3312 | 9108  | 6  |
| Donor2-CGGTTAATCCGCATCT-2 | 3350 | 20133 | 7  |
| Donor2-CGTAGGCAGCGTTGCC-2 | 1470 | 6622  | 8  |
| Donor2-CGTAGGCCACATTCGA-2 | 5099 | 16875 | 6  |
| Donor2-CGTAGGCGTGTGAATA-2 | 2947 | 6666  | 3  |
| Donor2-CGTAGGCGTTCCGGCA-2 | 5123 | 15962 | 5  |
| Donor2-CGTAGGCTCGTCACGG-2 | 3293 | 7902  | 5  |
| Donor2-CGTCACTAGAAACGCC-2 | 1882 | 8279  | 8  |
| Donor2-CGTCACTAGGCGATAC-2 | 5270 | 18174 | 4  |
| Donor2-CGTCACTCACAGATTC-2 | 5997 | 22736 | 5  |
| Donor2-CGTCACTGTCCGAATT-2 | 1842 | 8130  | 8  |
| Donor2-CGTCACTTCGCACTCT-2 | 7662 | 43157 | 2  |
| Donor2-CGTCAGGCAATTGCTG-2 | 2250 | 11782 | 7  |
| Donor2-CGTCAGGGTAGAGCTG-2 | 2456 | 10785 | 7  |
| Donor2-CGTCCATAGTGCCAGA-2 | 1305 | 5821  | 8  |
| Donor2-CGTCCATCACCAACCG-2 | 3240 | 13587 | 6  |
| Donor2-CGTCCATGTATGAATG-2 | 3767 | 10040 | 3  |
| Donor2-CGTCCATTCACATAGC-2 | 2074 | 5699  | 13 |
| Donor2-CGTCCATTCCAATGGT-2 | 1856 | 6131  | 9  |
| Donor2-CGTGAGCCAGCTCGCA-2 | 6481 | 34527 | 6  |
| Donor2-CGTGAGCGTCCGAATT-2 | 2778 | 8076  | 11 |
| Donor2-CGTGTAAGCTCTCGG-2  | 1854 | 6513  | 8  |
| Donor2-CGTGTAAGTTACGTCA-2 | 4884 | 16608 | 1  |
| Donor2-CGTTAGAAGTGAACAT-2 | 3394 | 10339 | 11 |
| Donor2-CGTTCTGAGAGGTACC-2 | 6026 | 38072 | 6  |
| Donor2-CGTTCTGCAGATGAGC-2 | 4841 | 18198 | 5  |
| Donor2-CGTTCTGTCCGCTGTT-2 | 2854 | 7746  | 6  |
| Donor2-CGTTGGGAGCTGTCTA-2 | 2159 | 7241  | 9  |
| Donor2-CGTTGGGCAAGCGTAG-2 | 3160 | 12100 | 11 |
| Donor2-CTAACTTAGCGATATA-2 | 2821 | 6653  | 6  |
| Donor2-CTAACTTAGGACAGCT-2 | 2884 | 8503  | 11 |
| Donor2-CTAACTTCAATAGCAA-2 | 2027 | 9607  | 7  |
| Donor2-CTAACTTCAGACTCGC-2 | 3501 | 11560 | 13 |
| Donor2-CTAACTTCATGCGCAC-2 | 1605 | 7145  | 7  |
| Donor2-CTAACTTGTTAAAGTG-2 | 4521 | 13711 | 1  |
| Donor2-CTAAGACGTGAGCGAT-2 | 1948 | 10892 | 8  |

Donor2-CTAATGGAGTCCATAC-2 6566 36563 6  
Donor2-CTAATGGAGTGGGATC-2 5082 15493 5  
Donor2-CTAATGGCACCATGG-2 2392 7823 10  
Donor2-CTAATGGTCTGCTGTC-2 2144 8399 9  
Donor2-CTACACCCAGTACACT-2 3639 21951 7  
Donor2-CTACACCTCTTGACGA-2 1857 12571 8  
Donor2-CTACATTAGGGTCTCC-2 3707 12962 11  
Donor2-CTACATTTCCGATATG-2 9274 83675 5  
Donor2-CTACCCAAGTCCTCCT-2 1581 8787 8  
Donor2-CTACCCAGTACTCGCG-2 4470 24025 6  
Donor2-CTACGTCAGTACTTGC-2 1808 7379 8  
Donor2-CTAGAGTGTGAGTATA-2 5568 26184 6  
Donor2-CTAGCCTAGCTGTTCA-2 3996 9327 5  
Donor2-CTAGCCTCATGCCTAA-2 3366 22366 7  
Donor2-CTCACACGTAATCACC-2 3815 22642 7  
Donor2-CTCACACGTGGTCTCG-2 3547 8078 2  
Donor2-CTCACACGTTCGTGAT-2 1545 8766 8  
Donor2-CTCACACGTTGAACTC-2 1559 6458 7  
Donor2-CTCACACTCCTGTACC-2 2477 7626 11  
Donor2-CTCAGAAGTCAATGTC-2 2678 10377 7  
Donor2-CTCAGAATCCTAGTGA-2 1807 6343 10  
Donor2-CTCATTAGTCCTAGCG-2 3673 12259 6  
Donor2-CTCATTAGTGACGCCT-2 3666 10175 6  
Donor2-CTCCTAGCACCAGATT-2 6906 33036 4  
Donor2-CTCGAAAAGACACGAC-2 2580 16032 8  
Donor2-CTCGAAAAGGACAGCT-2 2416 7881 13  
Donor2-CTCGAAACAATGGTCT-2 2059 13437 8  
Donor2-CTCGAAACAGGTCCAC-2 2657 15788 7  
Donor2-CTCGAGGAGGCAGGTT-2 1596 6125 10  
Donor2-CTCGAGGCACGAAATA-2 2358 13442 7  
Donor2-CTCGAGGGTCCTCTTG-2 2540 12367 7  
Donor2-CTCGGAGAGCTGTTCA-2 2966 9466 11  
Donor2-CTCGGGAAGAATGTTG-2 2003 9715 8  
Donor2-CTCGGGATCCTAGAAC-2 5926 35758 6  
Donor2-CTCGTACAGATCGATA-2 2263 10859 7  
Donor2-CTCGTACAGATCTGAA-2 2285 16888 8  
Donor2-CTCGTACCACCCTATC-2 6760 41708 4  
Donor2-CTCGTACTCTCTGAGA-2 1802 9459 8  
Donor2-CTCGTCAAGGAGTAGA-2 4467 29030 7  
Donor2-CTCGTCATCCGTTGTC-2 1990 7077 11  
Donor2-CTCTAATCACCGTTGG-2 4200 14828 11  
Donor2-CTCTACGGTCTCTCGT-2 5377 22100 5  
Donor2-CTCTACGTCCATTCTA-2 2481 7291 13  
Donor2-CTGAAACTCACATACG-2 4807 12150 1  
Donor2-CTGAAGTAGGCACATG-2 4821 12101 5  
Donor2-CTGAAGTCACATGGGA-2 3031 11546 11  
Donor2-CTGAAGTCAGCTGGCT-2 2499 9905 9  
Donor2-CTGAAGTTCAAACGGG-2 7104 55608 5  
Donor2-CTGATCCGTTAAAGTG-2 3374 11402 11  
Donor2-CTGATCCTCAAGGCTT-2 9188 128577 6  
Donor2-CTGATCCTCAGAGCTT-2 7114 60290 4  
Donor2-CTGCCTAAGGACAGAA-2 3516 11197 6  
Donor2-CTGCCTAAGTTACCCA-2 3775 8590 5  
Donor2-CTGCCTAGTCCGTGAC-2 1594 6422 13  
Donor2-CTGCCTATCGTCTGCT-2 5686 20680 5  
Donor2-CTGCTGTTCTTACCTA-2 2607 7590 11

Donor2-CTGGTCTGTGGGTCAA-2 2354 8950 7  
Donor2-CTGTGCTCAGCATGAG-2 2773 6040 6  
Donor2-CTGTTTACATGGTAGG-2 2098 9716 7  
Donor2-CTTAACTAGGAGTAGA-2 2128 6273 11  
Donor2-CTTAACTGTCTAAACC-2 5906 21322 6  
Donor2-CTTACCGCAACCGCCA-2 4307 14104 6  
Donor2-CTTACCGCATACTCTT-2 3380 8869 5  
Donor2-CTTACCGGTAGCGTGA-2 4728 14727 1  
Donor2-CTTACCGGTGTTTGGT-2 2863 15559 7  
Donor2-CTTACCGTCCCTTGCA-2 3471 13662 6  
Donor2-CTTACCGTCTTGTACT-2 4583 13776 6  
Donor2-CTTAGGACACCCATTC-2 3954 11090 4  
Donor2-CTTAGGACAGTATAAG-2 4978 16235 6  
Donor2-CTTAGGAGTTCCGGCA-2 5171 17057 4  
Donor2-CTTAGGATCGGCCGAT-2 1671 7930 7  
Donor2-CTTCTCTAGAAACCTA-2 8175 60844 1  
Donor2-CTTCTCTAGATGTTAG-2 2169 7854 13  
Donor2-CTTCTCTAGCTTTGGT-2 2558 9919 6  
Donor2-CTTTGCGCACGAAAGC-2 3020 17991 7  
Donor2-CTTTGCGCATCACAAC-2 3446 14094 6  
Donor2-CTTTGCGGTGGGTATG-2 2026 9155 7  
Donor2-CTTTGCGTCCTATGTT-2 1810 10100 8  
Donor2-GAAACTCCAAGCCCAC-2 3098 10048 11  
Donor2-GAAACTCCAAGCCTAT-2 6094 26394 6  
Donor2-GAAACTCGTCACCTAA-2 4066 11187 1  
Donor2-GAAACTCGTCTCTTTA-2 2021 7282 13  
Donor2-GAAACTCGTTGCGTTA-2 7923 45230 5  
Donor2-GAAACTCTCATGGTCA-2 1990 7409 9  
Donor2-GAACATCCAGATCCAT-2 3278 10605 11  
Donor2-GAACATCGTCTACCTC-2 1456 6055 8  
Donor2-GAACATCGTGGTTTCA-2 2252 9271 9  
Donor2-GAACATCGTTGTACAC-2 1659 5759 7  
Donor2-GAACATCTCGGATGTT-2 3470 8749 1  
Donor2-GAACCTACACGAAAGC-2 2783 15813 7  
Donor2-GAACCTACAGCAGTTT-2 3331 7474 2  
Donor2-GAACCTAGTCTAACGT-2 2229 6983 13  
Donor2-GAACGGACAGCGTCCA-2 5640 19202 5  
Donor2-GAACGGACAGCGTTCG-2 2064 6500 13  
Donor2-GAACGGAGTGTGGTTT-2 2699 9638 10  
Donor2-GAACGGAGTTGCGTTA-2 5723 21573 5  
Donor2-GAACGGATCCGATATG-2 4884 30169 6  
Donor2-GAACGGATCTTCGAGA-2 3514 12064 11  
Donor2-GAAGCAGAGGTGTTAA-2 1486 7551 8  
Donor2-GAAGCAGCAAGTAATG-2 5436 21339 3  
Donor2-GAAGCAGGTACTTCTT-2 5042 24870 6  
Donor2-GAAGCAGGTTACCTC-2 4460 11620 5  
Donor2-GAATAAGGTGTGCCTG-2 1878 7146 7  
Donor2-GAATGAAAGTCGATAA-2 1198 6081 8  
Donor2-GACACGCTCTGGAGCC-2 2511 12931 7  
Donor2-GACCAATAGCTGAACG-2 2458 6616 11  
Donor2-GACCAATTCGAGAACG-2 2594 8397 13  
Donor2-GACCTGGAGTCGTTTG-2 3452 23342 7  
Donor2-GACCTGGGTAAACGCG-2 2082 7263 13  
Donor2-GACCTGGGTCATGCCG-2 2736 6154 3  
Donor2-GACGCGTAGAAACCGC-2 5899 36150 5  
Donor2-GACGCGTAGAGACTTA-2 1324 6915 8

|                            |      |       |    |
|----------------------------|------|-------|----|
| Donor2-GACGCGTGTACCGAGA-2  | 3060 | 8904  | 11 |
| Donor2-GACGCGTGTCTGATCA-2  | 1698 | 8858  | 8  |
| Donor2-GACGCGTGTGCCTGCA-2  | 2440 | 8822  | 10 |
| Donor2-GACGGCTAGGGTGTGT-2  | 2747 | 13401 | 7  |
| Donor2-GACGTGCCAGTATAAG-2  | 2213 | 8448  | 6  |
| Donor2-GACGTTAAGTACATGA-2  | 2349 | 9217  | 9  |
| Donor2-GACGTTATCGCGATCG-2  | 6587 | 56405 | 5  |
| Donor2-GACGTTATCGGACAAG-2  | 1678 | 7070  | 13 |
| Donor2-GACTAACCACAAGTAA-2  | 4734 | 13111 | 1  |
| Donor2-GACTAACCATGTCGAT-2  | 5625 | 22284 | 3  |
| Donor2-GACTAACTCCTCAACC-2  | 2417 | 7892  | 11 |
| Donor2-GACTAACTCTCAAGTG-2  | 1478 | 6660  | 8  |
| Donor2-GACTAACTCTTTAGGG-2  | 2521 | 19141 | 8  |
| Donor2-GACTACACAGTCGTGC-2  | 4846 | 16015 | 6  |
| Donor2-GACTACACATGTAGTC-2  | 3996 | 22749 | 6  |
| Donor2-GACTACATCCTTGGTC-2  | 4985 | 15277 | 1  |
| Donor2-GACTGCGGTCTGATTG-2  | 3094 | 11970 | 10 |
| Donor2-GACTGCGGTTTCGTTGA-2 | 5058 | 18208 | 5  |
| Donor2-GACTGCGTCTGGCGAC-2  | 6743 | 30749 | 6  |
| Donor2-GAGGTGAAGCCCAATT-2  | 4022 | 13225 | 6  |
| Donor2-GAGGTGACACAAGTAA-2  | 2356 | 8702  | 9  |
| Donor2-GAGGTGAGTATAGTAG-2  | 6256 | 26669 | 5  |
| Donor2-GAGTCCGAGGGCATGT-2  | 1804 | 5997  | 13 |
| Donor2-GAGTCCGTACGCTGC-2   | 2105 | 9047  | 7  |
| Donor2-GAGTCCGTCAATAAGG-2  | 1687 | 9425  | 8  |
| Donor2-GATCAGTGTCCGAAGA-2  | 5606 | 29359 | 5  |
| Donor2-GATCGATAGGATGGAA-2  | 2168 | 7270  | 10 |
| Donor2-GATCGATGTAGTGAAT-2  | 4650 | 21905 | 6  |
| Donor2-GATCGTACAGCTCCGA-2  | 1968 | 5841  | 13 |
| Donor2-GATCGTAGTTGATTGC-2  | 2328 | 9675  | 9  |
| Donor2-GATCTAGGTCCTGGC-2   | 3155 | 10110 | 11 |
| Donor2-GATCTAGTCGTCCGTT-2  | 3150 | 11154 | 6  |
| Donor2-GATGAAACACCATGTA-2  | 3823 | 10040 | 3  |
| Donor2-GATGAAACACTCGACG-2  | 5603 | 17200 | 6  |
| Donor2-GATGAAACATGAAGTA-2  | 4016 | 28416 | 7  |
| Donor2-GATGAGGAGAAGGTTT-2  | 4861 | 17631 | 6  |
| Donor2-GATGAGGGTTGGTTTG-2  | 1572 | 7132  | 8  |
| Donor2-GATGCTAAGTCCATAC-2  | 6966 | 34329 | 5  |
| Donor2-GATTTCAGTCTTACCTA-2 | 2607 | 9291  | 13 |
| Donor2-GCAAACCTAGCAGGTCA-2 | 2596 | 10750 | 7  |
| Donor2-GCAAACCTAGCGATTCT-2 | 9403 | 90690 | 6  |
| Donor2-GCAAACCTGTTCCATGA-2 | 3409 | 25159 | 7  |
| Donor2-GCAAACCTCCTCCTAG-2  | 4496 | 65870 | 8  |
| Donor2-GCAATCACAAAGCGAGT-2 | 8540 | 56850 | 5  |
| Donor2-GCAATCAGTAAACGCG-2  | 3860 | 10898 | 6  |
| Donor2-GCACATATCACCCCTCA-2 | 2091 | 8056  | 7  |
| Donor2-GCACTCTAGCGTCTAT-2  | 1974 | 9980  | 7  |
| Donor2-GCACTCTCACTGTGTA-2  | 2435 | 7038  | 11 |
| Donor2-GCAGCCACAGGACCCT-2  | 5369 | 25874 | 5  |
| Donor2-GCAGCCAGTCAACATC-2  | 2280 | 11834 | 8  |
| Donor2-GCAGCCAGTTCTGGTA-2  | 2440 | 7534  | 11 |
| Donor2-GCAGTTACATTGTGCA-2  | 8442 | 47726 | 1  |
| Donor2-GCAGTTAGTAAATACG-2  | 2573 | 17152 | 7  |
| Donor2-GCAGTTATCCGAGCCA-2  | 3599 | 8783  | 4  |
| Donor2-GCATGATAGACTTGAA-2  | 3095 | 17484 | 7  |
| Donor2-GCATGATAGTGCAAGC-2  | 7756 | 54668 | 4  |

Donor2-GCATGCGGTAACGTTTC-2 4687 13106 2  
Donor2-GCATGTATCTACCTGC-2 5338 34590 6  
Donor2-GCCAAATTCACAAACC-2 5549 20321 6  
Donor2-GCCTCTACAGTCGATT-2 1771 6876 7  
Donor2-GCCTCTAGTGGGTATG-2 3492 18874 7  
Donor2-GCGACCAAGATGAGAG-2 3286 7425 3  
Donor2-GCGACCAGTTAAAGAC-2 2292 10550 7  
Donor2-GCGCAACTCGAATGCT-2 3407 15173 6  
Donor2-GCGCCAAAGCGACGTA-2 4905 15899 1  
Donor2-GCGCCAAAGCTGGAAC-2 4488 14862 6  
Donor2-GCGCCAACAGACACTT-2 6322 30446 6  
Donor2-GCGCGATCAGGAATCG-2 5846 22842 5  
Donor2-GCGGGTTCATTTGCC-2 1553 6143 8  
Donor2-GCTCCTAGTCGACTAT-2 8522 36188 6  
Donor2-GCTCCTATCCGCGGTA-2 3992 10095 1  
Donor2-GCTCCTATCTAACGGT-2 4039 11772 3  
Donor2-GCTCTGTCACATCTTT-2 2397 13239 7  
Donor2-GCTCTGTGTCTCATCC-2 6286 30388 6  
Donor2-GCTCTGTTCCAAAGTC-2 2207 11777 8  
Donor2-GCTGCAGAGAACAATC-2 5786 19540 3  
Donor2-GCTGCAGAGTTCGCGC-2 4609 29955 7  
Donor2-GCTGCGAAGTCGCCGT-2 4923 21810 6  
Donor2-GCTGCTTAGCTGATAA-2 1888 6709 9  
Donor2-GCTGCTTAGGAGTAGA-2 6418 32953 4  
Donor2-GCTGCTTACGAGAGT-2 2094 6896 13  
Donor2-GCTGCTTTCACCTTAT-2 1929 10879 8  
Donor2-GCTGCTTCTAACTGG-2 4218 12704 5  
Donor2-GCTGGGTCACGGTTTA-2 1755 9705 8  
Donor2-GCTGGGTGTAAGTAGT-2 2094 11638 8  
Donor2-GCTGGGTGTCTAAAGA-2 4387 12503 1  
Donor2-GCTGGGTCTTTAGGG-2 2588 7922 11  
Donor2-GCTTGAATCATATCGG-2 5015 16301 1  
Donor2-GCTTGAATCTGTGCAA-2 6657 50142 5  
Donor2-GGAAAGCCACTAGTAC-2 1714 7488 7  
Donor2-GGAAAGCCACTATCTT-2 2390 16273 7  
Donor2-GGAAAGCTCGCGCAA-2 4819 15820 1  
Donor2-GGAAAGCTCTGCCCTA-2 2864 24715 8  
Donor2-GGAACTTGTCGGTTAA-2 2315 6444 13  
Donor2-GGAATAATCAGAGACG-2 2647 7708 11  
Donor2-GGAATAATCTGTGCAA-2 2547 9877 6  
Donor2-GGACAAGAGAGTCTGG-2 2091 7949 9  
Donor2-GGACAGAAGCCACGTC-2 3659 12641 11  
Donor2-GGACAGACAGTGAGTG-2 1453 6871 8  
Donor2-GGACAGATCAACACCA-2 7215 47622 6  
Donor2-GGACATTTTCATAAAGG-2 4379 28276 7  
Donor2-GGACATTTCCCTGACT-2 4924 15733 6  
Donor2-GGACATTTTCGAATGGG-2 2689 7161 5  
Donor2-GGAGCAAAGCAGATCG-2 2622 8921 11  
Donor2-GGAGCAAAGGCCCTTG-2 2456 13242 7  
Donor2-GGAGCAATCCGCTGTT-2 1434 5951 8  
Donor2-GGAGCAATCGAGAGCA-2 4037 23335 6  
Donor2-GGATGTTTCTACCTGC-2 2073 6853 9  
Donor2-GGATTACAGTTACGGG-2 3204 7949 3  
Donor2-GGATTACGTATTACCG-2 2775 11974 6  
Donor2-GGATTACGTGCAGTAG-2 3900 15635 5  
Donor2-GGATTACGTGTGCCTG-2 9725 98811 6

|                            |      |       |    |
|----------------------------|------|-------|----|
| Donor2-GGCAATTGTTGCGTTA-2  | 5730 | 22666 | 6  |
| Donor2-GGCCGATGTAAATGAC-2  | 6470 | 25497 | 5  |
| Donor2-GGCCGATGTATAGTAG-2  | 1546 | 7644  | 8  |
| Donor2-GGCCGATGTCTCACCT-2  | 1663 | 6828  | 7  |
| Donor2-GGCGACTAGAAACGAG-2  | 2270 | 12578 | 7  |
| Donor2-GGCGACTGTAAATGTG-2  | 3794 | 8980  | 5  |
| Donor2-GGCGACTTCTGCAGTA-2  | 2065 | 9434  | 7  |
| Donor2-GGCGTGTAGGGCTCTC-2  | 2758 | 9173  | 10 |
| Donor2-GGCGTGTAGGGTGTG-2   | 1525 | 7192  | 8  |
| Donor2-GGCGTGTGTAAGGGCT-2  | 1325 | 7199  | 8  |
| Donor2-GGCGTGTGTGCACGAA-2  | 2199 | 9308  | 9  |
| Donor2-GGCTGGTTCTAAGCCA-2  | 5532 | 20714 | 6  |
| Donor2-GGGACCTAGATGTTAG-2  | 1812 | 9150  | 8  |
| Donor2-GGGACCTGTAGCTGCC-2  | 2495 | 11296 | 9  |
| Donor2-GGGACCTTCGAGCCCA-2  | 4400 | 24419 | 6  |
| Donor2-GGGATGAAGTTGAGAT-2  | 6170 | 26313 | 6  |
| Donor2-GGGCACTCATAACCTG-2  | 3582 | 28991 | 7  |
| Donor2-GGGCACTTCCCATTAT-2  | 1723 | 8934  | 7  |
| Donor2-GGGTCTGCAGACACTT-2  | 4698 | 15680 | 5  |
| Donor2-GGTATTGTCCAGATCA-2  | 3602 | 8966  | 1  |
| Donor2-GGTGAAGAGCTCCCAG-2  | 8747 | 75806 | 6  |
| Donor2-GGTGAAGTCCTGTAGA-2  | 1731 | 6560  | 13 |
| Donor2-GGTGCGTAGGTTACCT-2  | 1819 | 6929  | 7  |
| Donor2-GGTGCGTGTCCGCTGA-2  | 1638 | 6277  | 7  |
| Donor2-GGTGCGTGTCTACCTC-2  | 3009 | 10508 | 11 |
| Donor2-GGTGTTAAGAGTACCG-2  | 1458 | 6002  | 7  |
| Donor2-GGTGTTAAGGATCGCA-2  | 3289 | 7151  | 3  |
| Donor2-GGTGTTAGTGGTCTCG-2  | 7112 | 50650 | 5  |
| Donor2-GTAACGTAGTAGCGGT-2  | 2167 | 8421  | 10 |
| Donor2-GTAACGTCAAGGACTG-2  | 2684 | 11868 | 7  |
| Donor2-GTAACGTGTAGGACAC-2  | 5842 | 27621 | 6  |
| Donor2-GTAACTGAGTACATGA-2  | 1979 | 7907  | 6  |
| Donor2-GTAACTGGTCATGCCG-2  | 1541 | 9002  | 8  |
| Donor2-GTAACTGGTCGAGTTT-2  | 2969 | 13823 | 6  |
| Donor2-GTAACTGTCCAAGCCG-2  | 4970 | 30316 | 6  |
| Donor2-GTACGTAAGTAGTGCG-2  | 3323 | 10315 | 11 |
| Donor2-GTACTCCAGGATGGAA-2  | 3911 | 9539  | 3  |
| Donor2-GTACTCCCCTGAAGG-2   | 2449 | 17232 | 8  |
| Donor2-GTACTCCGTTTCGTGAT-2 | 7685 | 58296 | 6  |
| Donor2-GTACTCCTCAACCATG-2  | 5554 | 19277 | 6  |
| Donor2-GTACTCCTCGGTCTAA-2  | 3800 | 12428 | 8  |
| Donor2-GTACTTTTAGATGCCTT-2 | 6880 | 36733 | 1  |
| Donor2-GTACTTTTAGTGGGCTA-2 | 1468 | 6753  | 8  |
| Donor2-GTACTTTTACGACTCG-2  | 1926 | 6531  | 9  |
| Donor2-GTACTTTTCTCGCTTG-2  | 8031 | 52484 | 5  |
| Donor2-GTAGGCCAGACTAGAT-2  | 1807 | 12391 | 8  |
| Donor2-GTAGGCCGTACCAGTT-2  | 5324 | 18221 | 4  |
| Donor2-GTAGGCCTCAAGGCTT-2  | 4899 | 14721 | 2  |
| Donor2-GTAGTCAAGATAGCAT-2  | 6450 | 38320 | 4  |
| Donor2-GTAGTCACAATCAGAA-2  | 5429 | 18344 | 2  |
| Donor2-GTAGTCAGTGAAAGA-2   | 2016 | 7129  | 13 |
| Donor2-GTAGTCAGTTAAGAAC-2  | 4561 | 13739 | 5  |
| Donor2-GTATCTTAGAAACCAT-2  | 4534 | 16047 | 1  |
| Donor2-GTATTCTAGTCACGCC-2  | 2580 | 7045  | 11 |
| Donor2-GTATTCTTCCGCGCAA-2  | 1953 | 5716  | 11 |
| Donor2-GTATTCTTCGTCACGG-2  | 2352 | 13819 | 8  |

Donor2-GTCAAGTGTCGAAGA-2 1775 7545 7  
Donor2-GTCACAAGTCGCGGTT-2 3189 7176 3  
Donor2-GTCACAAATCGGAATCT-2 9842 90410 5  
Donor2-GTCACGGAGGCATGTG-2 5496 18115 5  
Donor2-GTCACGGCATCTGGTA-2 3376 23080 7  
Donor2-GTCACGGGTAAGGGAA-2 8829 67135 5  
Donor2-GTCACGGGTAGGGTAC-2 4499 33977 7  
Donor2-GTCACGGTCAGCACAT-2 2189 11979 7  
Donor2-GTCACGGTCATAAAGG-2 2462 15946 8  
Donor2-GTCATTTAGGAATTAC-2 6574 51271 6  
Donor2-GTCATTTACAGAGGT-2 2194 11928 7  
Donor2-GTCATTTTCCTTTCTC-2 7377 41103 6  
Donor2-GTCATTTTCGTCCGTT-2 3625 8998 3  
Donor2-GTCATTTCTGCCCTA-2 7732 42358 5  
Donor2-GTCCTCAGTCCCTACT-2 3742 9593 1  
Donor2-GTCCTCATCGCTAGCG-2 1717 6531 7  
Donor2-GTCGGGTAGTGGTAAT-2 1421 6712 8  
Donor2-GTCTCGTCACAGTCGC-2 1431 5783 7  
Donor2-GTGAAGGCAGGTGCCT-2 3727 8955 2  
Donor2-GTGCAGCCAGGGTACA-2 1771 7441 7  
Donor2-GTGCATAAGCGATGAC-2 2782 10484 13  
Donor2-GTGCATAAGGCAGTCA-2 3747 26119 7  
Donor2-GTGCATAGTGACGGTA-2 3951 22131 6  
Donor2-GTGCGGTGTGTAACGG-2 1704 5928 13  
Donor2-GTGCGGTTTCAATGCT-2 7011 31992 5  
Donor2-GTGCTTCAGCGCCTTG-2 1484 5751 8  
Donor2-GTGCTTCTCTATGTGG-2 2904 9311 11  
Donor2-GTGTTAGAGCAGGCTA-2 4167 11998 1  
Donor2-GTGTTAGAGCTAAGAT-2 2942 8733 4  
Donor2-GTGTTAGAGGACCACA-2 2484 7251 11  
Donor2-GTGTTAGCACAGACTT-2 7479 59659 5  
Donor2-GTTAAGCCACGGCGTT-2 4719 13045 5  
Donor2-GTTAAGCCATTCCTGC-2 1477 6422 8  
Donor2-GTTAAGCGTCCATCCT-2 1418 6767 8  
Donor2-GTTCATTTACAGGCC-2 3665 9354 4  
Donor2-GTTCATTTCCACGTTC-2 1689 6238 13  
Donor2-GTTCATTTCTACCAGA-2 2794 8439 11  
Donor2-GTTCGGGTCACCACCT-2 4143 36901 7  
Donor2-GTTCTCGTCGACCAGC-2 6251 27866 4  
Donor2-GTTTCTAGTATAAACG-2 8318 39623 3  
Donor2-GTTTCTATCGGGAGTA-2 6308 35592 6  
Donor2-TAAACCGAGGAATTAC-2 3060 10451 11  
Donor2-TAAACCGGTTGTTTGG-2 7156 47624 5  
Donor2-TAAGAGAGTCATTAGC-2 6504 29246 5  
Donor2-TAAGAGATCCAGGGCT-2 4761 13477 1  
Donor2-TAAGAGATCCCTTGCA-2 2658 5812 5  
Donor2-TAAGCGTAGAAGATTC-2 3959 23224 7  
Donor2-TAAGCGTCAAGTACCT-2 3489 7971 4  
Donor2-TAAGCGTGTGCGTTCT-2 2581 7225 11  
Donor2-TAAGCGTTCAGGCGAA-2 1916 6227 13  
Donor2-TAAGTGCAGCCGATTT-2 5461 20038 5  
Donor2-TAAGTGCCAAACCTAC-2 1410 5731 8  
Donor2-TAAGTGCCTGTGACGA-2 1956 12740 8  
Donor2-TAAGTGCCTGTTGAGG-2 3282 18898 7  
Donor2-TACACGACAGTATGCT-2 5282 26475 6  
Donor2-TACACGATCATTTGGG-2 2147 5790 13



Donor2-TACACGATCGAATGCT-2 3786 19120 6  
Donor2-TACAGTGAGGCACATG-2 2036 7217 11  
Donor2-TACAGTGCATTCCTCG-2 4574 13118 4  
Donor2-TACAGTGGTACTCAAC-2 2317 9735 7  
Donor2-TACCTATAGTATGACA-2 5876 22843 1  
Donor2-TACCTATGTCACCTAA-2 2690 7766 13  
Donor2-TACCTTAGTAGCGCAA-2 7007 28173 3  
Donor2-TACGGATCAGGATCGA-2 5345 35195 6  
Donor2-TACGGGCGTCCAGTAT-2 3353 12029 11  
Donor2-TACGGGCGTTCCTTG-2 5689 18272 5  
Donor2-TACGGTAAGCTTATCG-2 3138 13603 6  
Donor2-TACGGTACAAGACGTG-2 2260 14259 8  
Donor2-TACGGTACAATCGGTT-2 5331 24748 6  
Donor2-TACGGTACAGGAATCG-2 2809 8506 5  
Donor2-TACGGTATCGTGTAGT-2 5229 19073 4  
Donor2-TACTCATAGCTCAACT-2 5184 16690 1  
Donor2-TACTCATGTCTTCAAG-2 8000 50842 6  
Donor2-TACTCATTACGCATA-2 2950 14310 7  
Donor2-TACTCGCAGTTAGCGG-2 2157 11279 8  
Donor2-TACTTGTTAGGAATTAC-2 5570 29804 6  
Donor2-TACTTGTTGTTCCCTTG-2 2567 10650 7  
Donor2-TAGACCACACTAGTAC-2 3213 17535 7  
Donor2-TAGACCATCCAATGGT-2 2517 7279 11  
Donor2-TAGAGCTCAATGGATA-2 1590 7300 8  
Donor2-TAGCCGGGTGCATCTA-2 5720 19990 5  
Donor2-TAGGCATTC AAGCCTA-2 4412 12171 6  
Donor2-TAGTGGTAGACAGAGA-2 3032 16682 7  
Donor2-TAGTGGTAGGATGGAA-2 1871 7437 9  
Donor2-TAGTGGTGTCAAAGAT-2 1526 8870 8  
Donor2-TAGTGGTGTCCCTTGT-2 1921 10832 7  
Donor2-TAGTGGTGTGATTTCG-2 7884 44871 6  
Donor2-TAGTTGGAGCACAGGT-2 2958 6418 6  
Donor2-TAGTTGGCATGGTCAT-2 6733 24804 1  
Donor2-TAGTTGGGTCTGCAAT-2 2598 8804 10  
Donor2-TAGTTGGTCACTATTC-2 4411 15731 6  
Donor2-TAGTTGGTCCCTAACC-2 6028 29172 6  
Donor2-TATCAGGTCCTTTCGG-2 4535 12470 5  
Donor2-TATCTCACACTGAAGG-2 1782 5893 13  
Donor2-TATCTCAGTATAGGGC-2 1921 6545 13  
Donor2-TATCTCAGTCTGCCAG-2 1556 9433 8  
Donor2-TATCTCATCTGCGTAA-2 5696 18811 5  
Donor2-TATGCCCAGCAGATCG-2 5229 27814 6  
Donor2-TCAACGCACCCGAAA-2 4904 20919 5  
Donor2-TCAACGATCTGTTTGT-2 2829 8610 11  
Donor2-TCAATCTGTACTCTCC-2 5242 16743 5  
Donor2-TCACAAGTCGTTTGCC-2 1886 8106 9  
Donor2-TCACGAATCACGGTTA-2 1927 6739 10  
Donor2-TCAGATGTCGCTAGCG-2 6579 32852 6  
Donor2-TCAGCAAAGGGTTTCT-2 2015 6135 13  
Donor2-TCAGCAATCTGCTTGC-2 2255 10083 9  
Donor2-TCAGCTCAGGAGCGTT-2 5331 20893 5  
Donor2-TCATTACAGCCAGTAG-2 3337 8333 1  
Donor2-TCATTACAGTTGTAGA-2 6926 49074 6  
Donor2-TCATTACCACATTTCT-2 2973 13839 7  
Donor2-TCATTACGTTGAGTTC-2 2360 9333 9  
Donor2-TCATTTGAGCCCAGCT-2 3736 13632 11

Donor2-TCATTTGCATGTCCTC-2 6985 40557 6  
Donor2-TCGAGGCAGAGTACAT-2 4083 10032 3  
Donor2-TCGAGGCAGCGACGTA-2 5050 26758 5  
Donor2-TCGCGAGCAGGGTTAG-2 3609 8910 6  
Donor2-TCGCGAGGTACATCCA-2 5492 22051 4  
Donor2-TCGCGAGGTGACTACT-2 3831 25984 7  
Donor2-TCGCGAGGTTCTGTGAT-2 2481 6006 11  
Donor2-TCGCGTTAGCTACCTA-2 8076 48545 5  
Donor2-TCGGGACAGTTGTAGA-2 2480 6133 11  
Donor2-TCGGTAACACAGGAGT-2 4053 10565 1  
Donor2-TCGGTAAGTCGCGAAA-2 9077 85275 6  
Donor2-TCGTACCAGGAGCGAG-2 3848 9668 4  
Donor2-TCTATTGGTATAGGGC-2 1934 7857 13  
Donor2-TCTCTAAAGAGTGAGA-2 2210 6702 6  
Donor2-TCTCTAAAGCACGCCT-2 7626 68329 6  
Donor2-TCTCTAATCCCATTTA-2 5100 16291 1  
Donor2-TCTGAGATCAAACCGT-2 1215 5812 8  
Donor2-TCTGAGATCCATGAGT-2 3866 24905 7  
Donor2-TCTTCGGCATATGCTG-2 1249 6303 8  
Donor2-TCTTCGGCATGCGCAC-2 3950 9809 3  
Donor2-TGAAAGAAGACTAGAT-2 2222 10468 7  
Donor2-TGACAACAGTGTGGCA-2 3321 8224 3  
Donor2-TGACAACCACACCGCA-2 4375 11547 6  
Donor2-TGACAACGTAAGGATT-2 4238 31455 7  
Donor2-TGACAACTCCCTTGCA-2 2313 9481 9  
Donor2-TGACGGCCAAAGGCGT-2 6880 32998 1  
Donor2-TGACTAGAGCCAACAG-2 6241 26062 5  
Donor2-TGACTAGCAAGAGTCG-2 2379 11609 7  
Donor2-TGACTAGGTATGAAAC-2 6807 29686 5  
Donor2-TGACTTTTAGATAGGAG-2 3933 9257 5  
Donor2-TGACTTTTAGTACGCC-2 2614 6017 4  
Donor2-TGACTTTGTAAGTTCC-2 2466 8678 10  
Donor2-TGAGAGGCAGACAAAT-2 2262 6493 13  
Donor2-TGAGAGGCAGCTTCGG-2 3833 10068 4  
Donor2-TGAGAGGGTCTAGAGG-2 2931 19223 8  
Donor2-TGAGAGGGTTAAGACA-2 3192 7595 3  
Donor2-TGAGCATAGCGATAGC-2 1558 5732 7  
Donor2-TGAGCATCAATGGTCT-2 2372 6993 11  
Donor2-TGAGCATCACATGGGA-2 2264 10299 7  
Donor2-TGAGCATGTTTGGCGC-2 2834 8861 11  
Donor2-TGAGCCGTCTCAAACG-2 6270 28980 6  
Donor2-TGAGCCGTCTTAGAGC-2 6953 46982 4  
Donor2-TGAGGGAAAGTGCTGCC-2 3328 13772 6  
Donor2-TGAGGGACATCGGAAG-2 7972 66130 6  
Donor2-TGAGGGACATGGTCTA-2 5149 16134 6  
Donor2-TGAGGGAGTCTTCAAG-2 1447 7966 8  
Donor2-TGATTTTCAGCTAAACA-2 4626 14872 2  
Donor2-TGCCAAACACCGATAT-2 1946 11167 8  
Donor2-TGCCAAACACCTCGTT-2 1462 7007 8  
Donor2-TGCCAAATCCAGATCA-2 1830 7897 13  
Donor2-TGCCCATAGCCGTCGT-2 2431 6726 11  
Donor2-TGCCCATAGGATGCGT-2 2517 7337 11  
Donor2-TGCCCATCAAGCTGGA-2 2966 16497 7  
Donor2-TGCCCATTCAGAGACG-2 3015 22233 7  
Donor2-TGCCCTAAGAAGGGTA-2 8596 109574 5  
Donor2-TGCCCTAAGCAGGTCA-2 3282 15765 13

Donor2-TGCCCTACATGGGAAC-2 2873 6251 3  
Donor2-TGCGCAGAGTTCGCAT-2 3446 21356 7  
Donor2-TGCGGGTAGAGTGAGA-2 2521 8184 6  
Donor2-TGCGGGTCATCACAAC-2 2625 12150 7  
Donor2-TGCGGGTGTAGGCATG-2 3237 18600 7  
Donor2-TGCGTGGGTACCGTTA-2 2917 6762 3  
Donor2-TGCTACCCACCGAATT-2 5089 17070 4  
Donor2-TGCTACCTCACGAAGG-2 3323 28395 7  
Donor2-TGCTACCTCAGGTAAA-2 4190 21097 6  
Donor2-TGCTACCTCATCTGTT-2 2111 7037 6  
Donor2-TGCTGCTAGGTTACCT-2 1637 6197 8  
Donor2-TGCTGCTTCTCCCTGA-2 4617 13917 1  
Donor2-TGGACGCCAAGTCTAC-2 2715 22030 8  
Donor2-TGGACGCCAATGGATA-2 2768 9216 6  
Donor2-TGGACGCTCTCGTATT-2 3396 17759 10  
Donor2-TGGCGCAAGACGCACA-2 4017 10445 1  
Donor2-TGGCGCAGTAACGCGA-2 8142 56852 6  
Donor2-TGGCGCAGTCCAATA-2 2869 8565 11  
Donor2-TGGCGCAGTGTGCCTG-2 2852 11742 11  
Donor2-TGGCTGGAGAATTCCC-2 7177 53369 6  
Donor2-TGGCTGGAGACAGAGA-2 4553 13996 5  
Donor2-TGGCTGGCATTGCTT-2 2468 19786 8  
Donor2-TGGGAAGGTCATATGC-2 1703 6258 13  
Donor2-TGGGCGTCAAGGACAC-2 2739 9846 13  
Donor2-TGGGCGTTCGCCAAT-2 5628 31238 6  
Donor2-TGGTTAGAGATGTAAC-2 3863 29058 7  
Donor2-TGGTTCCCAGCGATCC-2 5321 18551 2  
Donor2-TGGTTCTCTTGAGAC-2 3113 7570 8  
Donor2-TGGTTCTCTTGTTTG-2 4292 11644 6  
Donor2-TGTATTCTCCTTTCTC-2 3542 12992 5  
Donor2-TGTATTCTCGCTGATA-2 6028 24460 6  
Donor2-TGTCCCAAGCTAGGCA-2 1751 5834 6  
Donor2-TGTCCCAGTGCTGGT-2 6521 35256 6  
Donor2-TGTCCCAGTTAAGTAG-2 2758 8559 10  
Donor2-TGTGTTTTCACAACGCC-2 6712 43622 4  
Donor2-TGTGTTTTGTGAGTATA-2 4360 12622 3  
Donor2-TGTGTTTTGTTGTCTTT-2 3846 11579 2  
Donor2-TGTTCCGAGGAATGGA-2 4796 23134 6  
Donor2-TGTTCCGTCAGTTCGA-2 5781 31755 5  
Donor2-TTAACTCAGCTGAACG-2 4259 17458 5  
Donor2-TTAACTCAGTAAGTAC-2 3128 8373 1  
Donor2-TTAACTCGTAGAGGAA-2 4035 19743 6  
Donor2-TTAACTCGTGTAAAGTA-2 7544 41251 5  
Donor2-TTAGTTCAGCTATGCT-2 5491 23573 6  
Donor2-TTAGTTCAGGAATGGA-2 6350 28924 6  
Donor2-TTAGTTCCACATCCGG-2 1906 7708 7  
Donor2-TTAGTTCTCGAATGGG-2 2262 15621 8  
Donor2-TTATGCTAGTCCATAC-2 2813 16629 7  
Donor2-TTCCCAGCAGCTCCGA-2 6105 33563 10  
Donor2-TTCCCAGCATCGACGC-2 3658 23347 7  
Donor2-TTCCCAGTCATGGTCA-2 2839 8732 11  
Donor2-TTCGAAGCATGCAATC-2 8381 54217 5  
Donor2-TTCGAAGTCTAACGGT-2 2941 10209 11  
Donor2-TTCGGTCAGGATGTAT-2 8127 44533 5  
Donor2-TTCTACAGTCGCATCG-2 2199 10755 7  
Donor2-TTCTCCTAGCGATATA-2 1223 5857 8

|                            |      |       |    |
|----------------------------|------|-------|----|
| Donor2-TTCTCCTAGTGTCCAT-2  | 2563 | 11955 | 7  |
| Donor2-TTCTCCTCACGAGAGT-2  | 6426 | 33449 | 4  |
| Donor2-TTCTCCTGTCAAACCTC-2 | 3203 | 18756 | 6  |
| Donor2-TTCTCCTGTGTGCCTG-2  | 3822 | 17672 | 6  |
| Donor2-TTCTTAGAGTATGACA-2  | 1635 | 6229  | 7  |
| Donor2-TTCTTAGGTCAGCTAT-2  | 3844 | 9988  | 1  |
| Donor2-TTCTTAGTCATAACCG-2  | 4098 | 12937 | 6  |
| Donor2-TTCTTAGTCCGTACAA-2  | 2181 | 15220 | 8  |
| Donor2-TTCTTAGTCTCGGACG-2  | 3088 | 7318  | 1  |
| Donor2-TTGAACGAGTAGCGGT-2  | 6904 | 50809 | 5  |
| Donor2-TTGACTTCACCGAAAG-2  | 3375 | 16789 | 10 |
| Donor2-TTGACTTGTATGAATG-2  | 3963 | 9845  | 3  |
| Donor2-TTGACTTGTTCGGCTCA-2 | 6285 | 25851 | 5  |
| Donor2-TTGACTTTCGTTTAGG-2  | 3932 | 10357 | 5  |
| Donor2-TTGCCGTCATGCGCAC-2  | 1573 | 8437  | 8  |
| Donor2-TTGCCGTTCACTTATC-2  | 2350 | 11450 | 7  |
| Donor2-TTGCCGTTTCGGCTACG-2 | 6274 | 27121 | 6  |
| Donor2-TTGCGTCGTTAAGATG-2  | 3868 | 18532 | 6  |
| Donor2-TTGGAACAGTTAGCGG-2  | 4468 | 10710 | 1  |
| Donor2-TTGGAACGTTGCGTTA-2  | 2777 | 10836 | 13 |
| Donor2-TTGGCAAAGCTCAACT-2  | 2632 | 13904 | 7  |
| Donor2-TTGGCAAACTGTCGG-2   | 1713 | 11108 | 8  |
| Donor2-TTGGCAAGTCCGTCAG-2  | 2361 | 10646 | 9  |
| Donor2-TTGTAGGGTCTTGTCC-2  | 2601 | 8651  | 11 |
| Donor2-TTTACTGAGCTGCCCA-2  | 4008 | 22955 | 6  |
| Donor2-TTTACTGCAGTATAAG-2  | 1394 | 7055  | 8  |
| Donor2-TTTATGCAGTGAAGAG-2  | 2412 | 12906 | 7  |
| Donor2-TTTATGCCACAGCCCA-2  | 3482 | 14742 | 6  |
| Donor2-TTTATGCGTAGCCTAT-2  | 3453 | 11818 | 3  |
| Donor2-TTTCCTCCATCGACGC-2  | 2124 | 9327  | 7  |
| Donor2-TTTCCTCGTACTCGCG-2  | 5825 | 26662 | 4  |
| Donor2-TTTGCGCAGATACACA-2  | 2265 | 8588  | 11 |
| Donor2-TTTGCGCAGGCAGGTT-2  | 2922 | 12100 | 7  |
| Donor2-TTTGCGCAGGTGACCA-2  | 4144 | 16641 | 4  |
| Donor2-TTTGCGCCACGACTCG-2  | 2045 | 11274 | 8  |
| Donor2-TTTGTCAAGAGCTGGT-2  | 1524 | 5830  | 10 |
| Donor3-AAACGGGGTAGTAGTA-1  | 3118 | 7062  | 3  |
| Donor3-AAACGGGGTCTAAAGA-1  | 2056 | 8950  | 7  |
| Donor3-AAACGGGGTGTAACGG-1  | 2224 | 12688 | 7  |
| Donor3-AAACGGGTCTCACATT-1  | 1161 | 6779  | 8  |
| Donor3-AAAGATGCAGCTGTTA-1  | 1331 | 8332  | 8  |
| Donor3-AAAGATGGTCAGATAA-1  | 6068 | 24303 | 5  |
| Donor3-AAAGCAATCACGACTA-1  | 2204 | 10997 | 7  |
| Donor3-AAAGCAATCTCGGACG-1  | 1667 | 6021  | 9  |
| Donor3-AAAGTAGCACCAGGTC-1  | 2532 | 12971 | 7  |
| Donor3-AAAGTAGGTGGCGAAT-1  | 3062 | 13437 | 6  |
| Donor3-AAAGTAGTCACAAACC-1  | 6785 | 33955 | 2  |
| Donor3-AAAGTAGTCGGCGGTT-1  | 6058 | 35119 | 4  |
| Donor3-AAAGTAGTCTGGGCCA-1  | 1711 | 10853 | 8  |
| Donor3-AAATGCCCAAGTCTAC-1  | 3342 | 7590  | 3  |
| Donor3-AAATGCCGTTTCGTCTC-1 | 4191 | 10669 | 6  |
| Donor3-AAATGCCTCACTTATC-1  | 1466 | 6026  | 7  |
| Donor3-AACACGTCAAGTTAAG-1  | 3307 | 14951 | 6  |
| Donor3-AACACGTCAGGTGCCT-1  | 6536 | 23774 | 1  |
| Donor3-AACACGTGTTCTCATT-1  | 6728 | 44964 | 4  |
| Donor3-AACACGTGTTGCCTCT-1  | 1611 | 7764  | 8  |

|                           |      |       |    |
|---------------------------|------|-------|----|
| Donor3-AACCATGAGGTGCTTT-1 | 3865 | 10091 | 3  |
| Donor3-AACCATGCATCAGTAC-1 | 1754 | 5097  | 13 |
| Donor3-AACCATGGTATCAGTC-1 | 6048 | 28383 | 6  |
| Donor3-AACCATGGTTAAGACA-1 | 3167 | 6898  | 3  |
| Donor3-AACCGCGCACAGGAGT-1 | 2468 | 15212 | 7  |
| Donor3-AACCGCGCACGCTTTC-1 | 1506 | 4658  | 9  |
| Donor3-AACCGCGTCCTTTCTC-1 | 1685 | 8146  | 7  |
| Donor3-AACGTTGAGCCCGAAA-1 | 1254 | 4932  | 8  |
| Donor3-AACGTTGCAGAGTGTG-1 | 1768 | 11472 | 8  |
| Donor3-AACGTTGGTGATAAGT-1 | 2723 | 6097  | 6  |
| Donor3-AACGTTGTCCGATATG-1 | 2133 | 5332  | 4  |
| Donor3-AACGTTGTCTCCAGGG-1 | 3542 | 8595  | 3  |
| Donor3-AACTCAGCACATGTGT-1 | 3355 | 21106 | 7  |
| Donor3-AACTCAGGTAGCAAAT-1 | 3975 | 17565 | 6  |
| Donor3-AACTCAGGTGTAAGTA-1 | 3301 | 7255  | 3  |
| Donor3-AACTCCCGTCATACTG-1 | 2034 | 10209 | 7  |
| Donor3-AACTCCCTCCTGTAGA-1 | 1402 | 8639  | 8  |
| Donor3-AACTCTTTCAGAGGTG-1 | 6314 | 23132 | 2  |
| Donor3-AACTGGTGTCCGTGAC-1 | 1548 | 4413  | 10 |
| Donor3-AACTGGTTCCACTCCA-1 | 3722 | 8829  | 3  |
| Donor3-AACTTTCAGCTGAACG-1 | 4364 | 11725 | 1  |
| Donor3-AACTTTCGTAGTAGTA-1 | 2041 | 9538  | 7  |
| Donor3-AACTTTCCTCCGGATG-1 | 2529 | 4856  | 2  |
| Donor3-AAGACCTCATTAACCG-1 | 2199 | 15533 | 8  |
| Donor3-AAGACCTTCAGGATCT-1 | 1819 | 13552 | 8  |
| Donor3-AAGACCTTCCACGTTC-1 | 5321 | 16617 | 6  |
| Donor3-AAGCCGCAGACTTTCG-1 | 1262 | 7175  | 8  |
| Donor3-AAGCCGCGTCGATTGT-1 | 4571 | 13023 | 5  |
| Donor3-AAGGAGCCAAGTCTAC-1 | 2225 | 6698  | 13 |
| Donor3-AAGGAGCGTCTTTCAT-1 | 2014 | 5799  | 11 |
| Donor3-AAGGAGCTCTTCAACT-1 | 1347 | 8050  | 8  |
| Donor3-AAGGCAGAGCTGTTCA-1 | 1039 | 5058  | 8  |
| Donor3-AAGGCAGAGTCTCAAC-1 | 4550 | 12703 | 1  |
| Donor3-AAGGCAGGTGTTTGGT-1 | 1346 | 6363  | 8  |
| Donor3-AAGGCAGGTTGGAGGT-1 | 1599 | 5705  | 8  |
| Donor3-AAGGCAGTCCTATGTT-1 | 2569 | 8614  | 6  |
| Donor3-AAGTTCCATTGTGCA-1  | 3848 | 9971  | 2  |
| Donor3-AAGTCTGAGCAGGCTA-1 | 2481 | 5396  | 3  |
| Donor3-AAGTCTGAGGCATGGT-1 | 2861 | 5491  | 6  |
| Donor3-AAGTCTGCACAGGAGT-1 | 1487 | 4776  | 13 |
| Donor3-AAGTCTGCATTCTCAT-1 | 3147 | 16368 | 7  |
| Donor3-AAGTCTGGTACCCAAT-1 | 2777 | 15934 | 7  |
| Donor3-AAGTCTGGTTTACTCT-1 | 3290 | 20418 | 7  |
| Donor3-AAGTCTGTCATGTCTT-1 | 1985 | 7339  | 9  |
| Donor3-AAGTCTGTCTGTTTGT-1 | 3764 | 9375  | 3  |
| Donor3-AATCCAGGTCTGCAAT-1 | 1454 | 4991  | 9  |
| Donor3-AATCCAGTCTGATACG-1 | 1735 | 4494  | 13 |
| Donor3-ACACCGGGTCAGATAA-1 | 1837 | 6336  | 9  |
| Donor3-ACAGCCGAGCGAAGGG-1 | 1866 | 12021 | 8  |
| Donor3-ACAGCCGCAAGACACG-1 | 5177 | 18023 | 2  |
| Donor3-ACAGCCGTCAACCAAC-1 | 1355 | 5035  | 7  |
| Donor3-ACAGCTAAGCTCAACT-1 | 5418 | 19891 | 5  |
| Donor3-ACATACGAGATGCCTT-1 | 1925 | 10213 | 7  |
| Donor3-ACATACGGTAGCGTCC-1 | 5679 | 27949 | 5  |
| Donor3-ACATACGGTCCGCTGA-1 | 1587 | 9890  | 8  |
| Donor3-ACATACGGTGTGGTTT-1 | 3392 | 8276  | 3  |

|                            |      |       |    |
|----------------------------|------|-------|----|
| Donor3-ACATACGTCGAACGGA-1  | 4545 | 52768 | 7  |
| Donor3-ACATCAGAGCGTGAAC-1  | 2667 | 5723  | 6  |
| Donor3-ACATCAGAGCTGAACG-1  | 2277 | 7359  | 13 |
| Donor3-ACATCAGGTTCCCGAG-1  | 2761 | 12265 | 7  |
| Donor3-ACATCAGTCCGCTGTT-1  | 1094 | 4846  | 8  |
| Donor3-ACATGGTAGTCGATAA-1  | 6216 | 31037 | 4  |
| Donor3-ACATGGTGTCTCCACT-1  | 1977 | 5815  | 6  |
| Donor3-ACATGGTTCAGGATCT-1  | 1055 | 4352  | 8  |
| Donor3-ACCAGTAAGAAGGTTT-1  | 2409 | 10895 | 7  |
| Donor3-ACCAGTATCACTTATC-1  | 4947 | 19182 | 6  |
| Donor3-ACCAGTATCTCTTGAT-1  | 1723 | 4628  | 13 |
| Donor3-ACCCACTAGTTACGGG-1  | 6625 | 26117 | 2  |
| Donor3-ACCCACTGTCAGAAGC-1  | 5069 | 22550 | 6  |
| Donor3-ACCCACTTCCGTTGCT-1  | 1072 | 5507  | 8  |
| Donor3-ACCGTAAAGTGTGTGCC-1 | 1591 | 4963  | 13 |
| Donor3-ACGAGCCCAATAACGA-1  | 2885 | 6300  | 3  |
| Donor3-ACGAGCCCACACCGAC-1  | 2323 | 7657  | 13 |
| Donor3-ACGAGCCCACCTTGTC-1  | 952  | 5077  | 8  |
| Donor3-ACGAGGACACCAGGCT-1  | 6835 | 51730 | 5  |
| Donor3-ACGAGGACATCACGAT-1  | 3071 | 12381 | 7  |
| Donor3-ACGAGGATCAACACTG-1  | 1737 | 6107  | 9  |
| Donor3-ACGAGGATCAGCGACC-1  | 1609 | 5226  | 13 |
| Donor3-ACGATACAGGAGTTGC-1  | 2327 | 12350 | 7  |
| Donor3-ACGATACAGGCTATCT-1  | 1327 | 4678  | 9  |
| Donor3-ACGATACTCCCTGACT-1  | 6337 | 25198 | 1  |
| Donor3-ACGATACTCTACCAGA-1  | 2862 | 17074 | 7  |
| Donor3-ACGATGTAGACAGGCT-1  | 1668 | 8174  | 7  |
| Donor3-ACGATGTAGGATCGCA-1  | 2199 | 7051  | 11 |
| Donor3-ACGATGTCAGATCCAT-1  | 3537 | 8716  | 3  |
| Donor3-ACGATGTGTTGTCTTT-1  | 1636 | 4379  | 13 |
| Donor3-ACGCAGCAGCCAGTTT-1  | 4024 | 20749 | 6  |
| Donor3-ACGCAGCAGGACTGGT-1  | 2094 | 9780  | 7  |
| Donor3-ACGCAGCAGTGGACGT-1  | 1438 | 9577  | 8  |
| Donor3-ACGCAGCCAATGGATA-1  | 4233 | 21653 | 6  |
| Donor3-ACGCAGCTCTTACCTA-1  | 3614 | 8848  | 3  |
| Donor3-ACGCCAGAGTCCGGTC-1  | 4056 | 10891 | 5  |
| Donor3-ACGCCAGCAAGCCTAT-1  | 1073 | 4919  | 8  |
| Donor3-ACGGAGAAGACTACAA-1  | 1031 | 4449  | 8  |
| Donor3-ACGGAGAAGCTGATAA-1  | 1508 | 7044  | 8  |
| Donor3-ACGGAGAAGGAGCGTT-1  | 2374 | 9710  | 7  |
| Donor3-ACGGAGAAGGCTACGA-1  | 1643 | 7850  | 7  |
| Donor3-ACGGAGAAGGGTATCG-1  | 4859 | 19190 | 6  |
| Donor3-ACGGAGACACGCATCG-1  | 2560 | 6667  | 10 |
| Donor3-ACGGAGATCCGCATAA-1  | 1538 | 8804  | 8  |
| Donor3-ACGGCCAAGACTGTAA-1  | 4796 | 13380 | 2  |
| Donor3-ACGGCCAAGCATCATC-1  | 3488 | 8556  | 4  |
| Donor3-ACGGCCAAGGGCACTA-1  | 1634 | 10740 | 8  |
| Donor3-ACGGCCACAGCTATTG-1  | 1495 | 4489  | 13 |
| Donor3-ACGGCCAGTCCGAACC-1  | 1551 | 4953  | 9  |
| Donor3-ACGGCCAGTGAACCTT-1  | 2095 | 7219  | 10 |
| Donor3-ACGGCCATCTGTCTCG-1  | 2178 | 9615  | 9  |
| Donor3-ACGGGCTTCAGTCAGT-1  | 1189 | 7911  | 8  |
| Donor3-ACGGGCTTCCGTTGTC-1  | 3770 | 14054 | 6  |
| Donor3-ACGGGTCCAAGTAATG-1  | 4537 | 13562 | 2  |
| Donor3-ACGGGTCTGTGTTAAGA-1 | 1333 | 5741  | 8  |
| Donor3-ACGTCAAAGTACGCGA-1  | 1169 | 6213  | 8  |

|                            |      |       |    |
|----------------------------|------|-------|----|
| Donor3-ACGTCAATCTCGGACG-1  | 5565 | 23414 | 6  |
| Donor3-ACTATCTAGCACCGTC-1  | 3951 | 10843 | 3  |
| Donor3-ACTATCTGTACATCCA-1  | 1821 | 6906  | 7  |
| Donor3-ACTGAACAGAATCTCC-1  | 1685 | 5934  | 7  |
| Donor3-ACTGAACAGTGTCCAT-1  | 2734 | 8941  | 4  |
| Donor3-ACTGAACCAGCGTAAG-1  | 1466 | 5125  | 7  |
| Donor3-ACTGAACGTCTCTCTG-1  | 6237 | 21113 | 3  |
| Donor3-ACTGATGCAAGGCTCC-1  | 1488 | 5127  | 9  |
| Donor3-ACTGTCCAGGGTATCG-1  | 1573 | 9007  | 8  |
| Donor3-ACTTACTAGTGGGATC-1  | 5798 | 21388 | 5  |
| Donor3-ACTTACTCACGCGAAA-1  | 2662 | 8592  | 10 |
| Donor3-ACTTACTCACTTACGA-1  | 2083 | 7349  | 10 |
| Donor3-ACTTACTGTCCCTTGT-1  | 2588 | 8017  | 10 |
| Donor3-ACTTGTTTCGCCATAA-1  | 1741 | 7336  | 8  |
| Donor3-ACTTTCACAGCTGGCT-1  | 1329 | 4304  | 9  |
| Donor3-ACTTTCATCCAAGCCG-1  | 2099 | 6803  | 11 |
| Donor3-AGACGTTTCATGGGACA-1 | 2516 | 8025  | 10 |
| Donor3-AGACGTTGTCTCGTTC-1  | 2559 | 5128  | 6  |
| Donor3-AGAGCGAGTTTAAGCC-1  | 2581 | 12215 | 7  |
| Donor3-AGAGCTTAGAGGGCTT-1  | 2260 | 6335  | 6  |
| Donor3-AGAGCTTAGATATGCA-1  | 3149 | 10042 | 11 |
| Donor3-AGAGTGGAGCGATCCC-1  | 3625 | 8809  | 3  |
| Donor3-AGAGTGGTCAGAAATG-1  | 2332 | 10926 | 7  |
| Donor3-AGAGTGGTCGAATCCA-1  | 4175 | 17003 | 6  |
| Donor3-AGAGTGGTCGAATGGG-1  | 1368 | 7167  | 8  |
| Donor3-AGATTGCAGTTAAGTG-1  | 1757 | 10359 | 8  |
| Donor3-AGCAGCCAGAGACTTA-1  | 4247 | 16293 | 2  |
| Donor3-AGCAGCCGTCCAATA-1   | 6255 | 25698 | 5  |
| Donor3-AGCATAACAGTTATCGC-1 | 1700 | 4454  | 13 |
| Donor3-AGCCTAAAGATGTGGC-1  | 2389 | 16302 | 7  |
| Donor3-AGCCTAAAGGTAAACT-1  | 4431 | 22983 | 6  |
| Donor3-AGCCTAACAAATCCGAT-1 | 1165 | 4679  | 8  |
| Donor3-AGCGGTCAGAATAGGG-1  | 2982 | 14696 | 7  |
| Donor3-AGCGGTCGTTACGCGC-1  | 2455 | 5203  | 5  |
| Donor3-AGCGGTCCTCGTGTAGT-1 | 1672 | 4869  | 8  |
| Donor3-AGCGTATCACCGTTGG-1  | 5662 | 19583 | 5  |
| Donor3-AGCGTATTCTGCTGCT-1  | 6652 | 30492 | 6  |
| Donor3-AGCGTCGAGCTAGCCC-1  | 3809 | 8881  | 3  |
| Donor3-AGCGTCGCAATGGACG-1  | 1587 | 4600  | 13 |
| Donor3-AGCTCCTAGTTAAGTG-1  | 1931 | 7907  | 9  |
| Donor3-AGCTCCTCACAGTCGC-1  | 5885 | 24646 | 6  |
| Donor3-AGCTCCTCACGGTTTA-1  | 1356 | 8015  | 8  |
| Donor3-AGCTCCTCACTACAGT-1  | 2798 | 23023 | 8  |
| Donor3-AGCTCCTGTTACCAGT-1  | 1374 | 5891  | 8  |
| Donor3-AGCTCCTGTTCTGTTT-1  | 1519 | 8918  | 8  |
| Donor3-AGCTCCTTCGAGAACG-1  | 2195 | 7945  | 10 |
| Donor3-AGCTCTCAGCAGCGTA-1  | 4397 | 24017 | 4  |
| Donor3-AGCTCTCTCGAATCCA-1  | 2259 | 6742  | 13 |
| Donor3-AGCTCTCTCTGACCTC-1  | 1509 | 8586  | 8  |
| Donor3-AGCTTGAAGGATGGAA-1  | 4460 | 14101 | 2  |
| Donor3-AGGCCACTCCGAGCCA-1  | 1964 | 7728  | 9  |
| Donor3-AGGCCACTCCTTAATC-1  | 5134 | 26951 | 6  |
| Donor3-AGGCCGTCATGGGACA-1  | 1531 | 4344  | 13 |
| Donor3-AGGGAGTGTACAGTTC-1  | 1241 | 6078  | 8  |
| Donor3-AGGGAGTGTCTGCGGT-1  | 2832 | 11048 | 10 |
| Donor3-AGGGATGGTAATTGGA-1  | 1922 | 5091  | 5  |

Donor3-AGGGATGTCAGAGCTT-1 1656 5452 9  
Donor3-AGGGATGTCCTAGTGA-1 2584 7552 4  
Donor3-AGGGTGAAGCTCCTTC-1 1692 7987 7  
Donor3-AGGGTGACAATCAGAA-1 1611 5777 8  
Donor3-AGGGTGACACTTAACG-1 5136 16592 1  
Donor3-AGGTCATGTGAGCGAT-1 3748 9568 3  
Donor3-AGGTCATTCGCGGATC-1 915 5197 7  
Donor3-AGGTCCGAGGCCATAG-1 1513 5103 9  
Donor3-AGGTCCGCAGTCAGCC-1 3349 7491 3  
Donor3-AGGTCCGGTAGGGACT-1 2280 12180 7  
Donor3-AGTAGTCCATTGAGCT-1 5162 16385 1  
Donor3-AGTCTTTAGGACGAAA-1 3752 23154 7  
Donor3-AGTCTTTGTCTCTTG-1 1134 6382 8  
Donor3-AGTCTTTGTCTGGATCC-1 1711 11395 8  
Donor3-AGTCTTTCTGCAAGT-1 5469 18446 4  
Donor3-AGTGAGGAGGGCACTA-1 3186 11825 11  
Donor3-AGTGGGACACGGCTAC-1 5504 26806 6  
Donor3-AGTGGGAGTGGGTCAA-1 2216 16449 8  
Donor3-AGTGGGAGTTGCCTCT-1 1773 9055 7  
Donor3-AGTGTCACAGGTCCAC-1 1374 7891 8  
Donor3-AGTTGGTCACTATCTT-1 3682 17953 6  
Donor3-AGTTGGTGTGGTACAG-1 1384 5400 8  
Donor3-ATAACGCTCGGAAATA-1 1636 11003 8  
Donor3-ATAAGAGCACTGTGTA-1 1281 4736 9  
Donor3-ATAAGAGTCCAAATGC-1 1317 5761 8  
Donor3-ATAGACCAGCCATCGC-1 3580 8655 4  
Donor3-ATAGACCGTATTCTCT-1 1900 7389 9  
Donor3-ATCACGAAGTTAGCGG-1 4029 31847 7  
Donor3-ATCACGAGTCCTAGCG-1 1343 5409 7  
Donor3-ATCATCTAGGGTTCCC-1 1707 10904 8  
Donor3-ATCATCTGTCTAAAGA-1 2055 4796 3  
Donor3-ATCATGGAGGTAGCTG-1 3853 18887 6  
Donor3-ATCCACCAGAAACCGC-1 3026 6545 3  
Donor3-ATCCACCGTAATCGTC-1 1641 4499 13  
Donor3-ATCCACCGTTGGAGGT-1 2083 11802 7  
Donor3-ATCCGAAAGGACCACA-1 1725 9239 8  
Donor3-ATCCGAACAAATTGCC-1 1080 4346 8  
Donor3-ATCCGAAGTTGCGCAC-1 2469 13811 7  
Donor3-ATCGAGTTCTCCTATA-1 1837 5816 13  
Donor3-ATCTACTGTGGCGAAT-1 4157 11252 3  
Donor3-ATCTACTTCTTACCTA-1 3145 7246 5  
Donor3-ATCTGCCAGAAACCGC-1 4168 10732 1  
Donor3-ATCTGCCACAGACAG-1 1182 4776 8  
Donor3-ATGAGGGAGAGCTGGT-1 1214 6233 8  
Donor3-ATGAGGGAGGCATGTG-1 1297 7246 8  
Donor3-ATGAGGGGTTTAGCTG-1 1663 6388 7  
Donor3-ATGAGGGTCATGCAAC-1 2806 12446 7  
Donor3-ATGCGATAGCGCTTAT-1 1501 7338 8  
Donor3-ATGCGATCATAGTAAG-1 1425 7612 8  
Donor3-ATGCGATGTCTAGAGG-1 6624 34587 6  
Donor3-ATGGGAGAGAAACCAT-1 4383 12954 4  
Donor3-ATGGGAGCAGATGGGT-1 1571 5813 7  
Donor3-ATGGGAGGTCTAGTGT-1 1547 7182 7  
Donor3-ATGGGAGGTTACCAGT-1 1112 6443 8  
Donor3-ATGGGAGTCACGCGGT-1 2091 6336 13  
Donor3-ATGTGTGAGAATGTTG-1 1885 13050 8



Donor3-ATGTGTGAGGCTAGAC-1 1253 5278 7  
Donor3-ATGTGTGAGTTGTAGA-1 2510 9107 9  
Donor3-ATGTGTGTCGGCGGTT-1 1644 4400 13  
Donor3-ATTACTCAGAATTGTG-1 1975 6535 13  
Donor3-ATTACTCAGCGCCTCA-1 2057 5646 10  
Donor3-ATTACTCAGGGTTTCT-1 3539 7813 2  
Donor3-ATTATCCCAGGCAGTA-1 1900 13407 8  
Donor3-ATTATCCGTGAGGCTA-1 1476 5334 7  
Donor3-ATTATCCGTGGAAAGA-1 2223 8705 9  
Donor3-ATTATCCGTTAAGACA-1 3171 7413 5  
Donor3-ATTCTACCACATTCGA-1 8745 77185 6  
Donor3-ATTCTACCATGCTGGC-1 1416 4897 7  
Donor3-ATTGGACCAAACCTGTC-1 4329 14256 5  
Donor3-ATTGGACCATACAGCT-1 4215 14585 6  
Donor3-ATTGGTGCATCACGTA-1 2120 9228 7  
Donor3-ATTGGTGTCTAGGAG-1 1722 5892 9  
Donor3-ATTTCTGGTTAGAACA-1 1560 4287 6  
Donor3-CAACCTCAGCTAGTCT-1 4467 19549 10  
Donor3-CAACCTCCACTGTTAG-1 4179 26950 7  
Donor3-CAACTAGAGTCCAGGA-1 1546 5296 13  
Donor3-CAACTAGCACAAACGCC-1 2623 8496 13  
Donor3-CAACTAGGTTATCACG-1 3489 16881 6  
Donor3-CAACTAGGTTATCGGT-1 5670 18346 1  
Donor3-CAAGATCAGGCCCGTT-1 1593 7304 8  
Donor3-CAAGATCCAAACCTGCT-1 1797 9927 8  
Donor3-CAAGATCCAATGACCT-1 4828 14631 1  
Donor3-CAAGGCCAGAAACCAT-1 1903 4763 13  
Donor3-CACAAACCACTACAGT-1 1435 6103 13  
Donor3-CACACCTCAAGCTGAG-1 2881 13479 7  
Donor3-CACACCTGTATAATGG-1 2046 10985 7  
Donor3-CACACTCAGTCATGCT-1 2337 9551 9  
Donor3-CACACTCCAACCTTGAC-1 3804 14336 10  
Donor3-CACACTCCACAACGTT-1 1309 7019 8  
Donor3-CACACTCTCGTATCAG-1 3301 12595 10  
Donor3-CACAGGCAGAGTACCG-1 4857 25228 5  
Donor3-CACAGGCGTACTTCTT-1 6531 27004 5  
Donor3-CACAGGCGTAGCACGA-1 1316 5918 8  
Donor3-CACAGTACACTATCTT-1 1983 4523 4  
Donor3-CACAGTATCCGAACGC-1 2330 6653 10  
Donor3-CACAGTATCGCATGGC-1 3290 15912 7  
Donor3-CACATAGCACGAAAGC-1 4147 22338 6  
Donor3-CACATAGGTAGAGGAA-1 4768 15417 6  
Donor3-CACATAGTCACTATTC-1 6558 29683 6  
Donor3-CACATTTTACATGTGT-1 2655 5639 5  
Donor3-CACATTTTGTGGGACA-1 6323 33770 4  
Donor3-CACCACTCAGGGTACA-1 4906 12159 3  
Donor3-CACCACTGTTAAGACA-1 5064 22192 6  
Donor3-CACTCCAGTCTAACGT-1 1729 4425 13  
Donor3-CAGAATCCAACTGCGC-1 2486 6544 4  
Donor3-CAGAATCCACGCATCG-1 4869 14740 5  
Donor3-CAGAATCTCACACCT-1 947 4410 8  
Donor3-CAGAGAGAGCCACGCT-1 1774 12316 8  
Donor3-CAGAGAGTCCGTCATC-1 2773 12637 7  
Donor3-CAGATCAAGTGGGTTG-1 2330 10716 7  
Donor3-CAGATCAGTCTAGGTT-1 5008 15268 5  
Donor3-CAGATCAGTCTCTTAT-1 2407 19043 8

|                            |      |       |    |
|----------------------------|------|-------|----|
| Donor3-CAGATCAGTTCTGGTA-1  | 1704 | 6393  | 7  |
| Donor3-CAGCAGCAGAGGTTGC-1  | 6205 | 21521 | 5  |
| Donor3-CAGCAGCAGAGTAAGG-1  | 3028 | 14012 | 7  |
| Donor3-CAGCAGCCAAGTCTGTA-1 | 1573 | 5616  | 9  |
| Donor3-CAGCAGCCATAGAAAC-1  | 1238 | 4370  | 8  |
| Donor3-CAGCAGCTCTAGAGTC-1  | 2039 | 8035  | 9  |
| Donor3-CAGCATAACCCACGTG-1  | 2722 | 13886 | 7  |
| Donor3-CAGCATAAGTTAAGACA-1 | 1533 | 9138  | 8  |
| Donor3-CAGCCGACAAGCCGTC-1  | 1066 | 5766  | 8  |
| Donor3-CAGCCGAGTCTAAAGA-1  | 1425 | 7488  | 8  |
| Donor3-CAGCGACAGTCATGCT-1  | 5357 | 30008 | 6  |
| Donor3-CAGCTAAAGTGGACGT-1  | 5604 | 28748 | 5  |
| Donor3-CAGCTAACAGTATGCT-1  | 1389 | 4506  | 9  |
| Donor3-CAGCTAATCCGCGCAA-1  | 7199 | 34905 | 5  |
| Donor3-CAGCTGGAGGCAAAGA-1  | 1675 | 7677  | 7  |
| Donor3-CAGCTGGCAGACGTAG-1  | 1463 | 5275  | 9  |
| Donor3-CAGCTGGGTACGCACC-1  | 3817 | 9774  | 1  |
| Donor3-CAGGTGCCACAGCGTC-1  | 2724 | 5772  | 3  |
| Donor3-CAGTAACAGCACACAG-1  | 2446 | 7999  | 10 |
| Donor3-CAGTAACAGCTAACAA-1  | 2281 | 15412 | 8  |
| Donor3-CAGTAACAGTGTACTC-1  | 6906 | 33020 | 1  |
| Donor3-CAGTAACCACTACAGT-1  | 1764 | 9686  | 8  |
| Donor3-CATATGGAGATGCGAC-1  | 5582 | 20804 | 4  |
| Donor3-CATCAAGCACATTAGC-1  | 3402 | 8314  | 5  |
| Donor3-CATCAAGGTGATAAGT-1  | 3163 | 10437 | 4  |
| Donor3-CATCAAGTCTTAACCT-1  | 4118 | 20087 | 6  |
| Donor3-CATCAGACAGCTGTTA-1  | 1142 | 4605  | 8  |
| Donor3-CATCAGAGTGTCCCTCT-1 | 1365 | 8350  | 8  |
| Donor3-CATCCACAGCCAGTAG-1  | 6033 | 31776 | 4  |
| Donor3-CATCCACTCTCGATGA-1  | 7051 | 50323 | 6  |
| Donor3-CATCGGGCATGATCCA-1  | 1802 | 7642  | 7  |
| Donor3-CATCGGGGTGCACCAC-1  | 1537 | 8602  | 8  |
| Donor3-CATCGGGGTGTCGCTG-1  | 4549 | 13173 | 5  |
| Donor3-CATGCCTCAGACACTT-1  | 8488 | 46557 | 2  |
| Donor3-CATGGCGAGCGTAATA-1  | 4102 | 11109 | 1  |
| Donor3-CATGGCGCACGTAAGG-1  | 1183 | 4441  | 8  |
| Donor3-CATGGCGGTATTTCGTG-1 | 2814 | 10501 | 6  |
| Donor3-CATGGCGGTCTAGCCG-1  | 2748 | 5928  | 4  |
| Donor3-CATGGCGTCCCTCTTT-1  | 1703 | 6209  | 13 |
| Donor3-CATTATCAGGATATAC-1  | 1631 | 9274  | 8  |
| Donor3-CATTATCCAAAGCAAT-1  | 3628 | 16861 | 6  |
| Donor3-CATTTCGAGTTTCGCAT-1 | 5643 | 16785 | 5  |
| Donor3-CATTTCGCCAGATAATG-1 | 1615 | 6645  | 7  |
| Donor3-CCAATCCAGAATCTCC-1  | 6120 | 28888 | 5  |
| Donor3-CCAATCCCAAGTCTAC-1  | 1308 | 6755  | 8  |
| Donor3-CCAATCCCAATAGCAA-1  | 3339 | 7758  | 3  |
| Donor3-CCAATCCTCCAGATCA-1  | 1408 | 7083  | 8  |
| Donor3-CCACCTAAGATAGTCA-1  | 1495 | 4322  | 13 |
| Donor3-CCACCTAAGCTATGCT-1  | 1448 | 8542  | 8  |
| Donor3-CCACCTACACTGTTAG-1  | 4324 | 10868 | 2  |
| Donor3-CCACCTAGTCTAGGTT-1  | 1578 | 5744  | 7  |
| Donor3-CCACCTATCTCTTATG-1  | 1691 | 5555  | 9  |
| Donor3-CCACGGAAGCGCCTCA-1  | 1676 | 9264  | 8  |
| Donor3-CCACGGATCCAATGGT-1  | 4770 | 15198 | 1  |
| Donor3-CCAGCGAAGAATAGGG-1  | 1057 | 4576  | 8  |
| Donor3-CCAGCGAAGGGAAACA-1  | 2234 | 10919 | 7  |

|                            |      |       |    |
|----------------------------|------|-------|----|
| Donor3-CCATGTCAGTTTGCCT-1  | 3106 | 13038 | 6  |
| Donor3-CCATTCGCAAGAAGAG-1  | 1847 | 4704  | 13 |
| Donor3-CCATTCGGTATAGGTA-1  | 5559 | 26679 | 5  |
| Donor3-CCCAATCAGACGACGT-1  | 3002 | 17054 | 7  |
| Donor3-CCCAATCAGCCACGCT-1  | 1841 | 6213  | 13 |
| Donor3-CCCAATCTCCAGAGGA-1  | 8733 | 59775 | 5  |
| Donor3-CCCAGTTAGCGATAGC-1  | 4489 | 13462 | 2  |
| Donor3-CCCAGTTAGGGAAACA-1  | 2596 | 9688  | 10 |
| Donor3-CCCAGTTCACCGAAAG-1  | 2757 | 8419  | 10 |
| Donor3-CCCAGTTTCAACACCA-1  | 4647 | 12203 | 4  |
| Donor3-CCCATACGTTCGCGGTT-1 | 5718 | 30378 | 5  |
| Donor3-CCATACTCTTGGGTA-1   | 3729 | 18617 | 6  |
| Donor3-CCCTCCTCATTAGCCA-1  | 5188 | 19023 | 5  |
| Donor3-CCCTCCTTCTTGACGA-1  | 1544 | 4649  | 13 |
| Donor3-CCGTGGAAGACACTAA-1  | 1668 | 8096  | 8  |
| Donor3-CCGTGGAAGATGCGAC-1  | 1789 | 6040  | 6  |
| Donor3-CCGTGGAAGGACATTA-1  | 2760 | 11196 | 6  |
| Donor3-CCGTGGACATGTAGTC-1  | 7675 | 43791 | 5  |
| Donor3-CCGTGGAGTAACGACG-1  | 1700 | 5388  | 13 |
| Donor3-CCGTGGAGTTAAAGTG-1  | 1449 | 5202  | 7  |
| Donor3-CCGTGGAGTTGATTGC-1  | 5952 | 33415 | 6  |
| Donor3-CCGTTCGAAGGCTCTTA-1 | 4825 | 28951 | 6  |
| Donor3-CCGTTCAGTTCGGCAC-1  | 1292 | 6105  | 8  |
| Donor3-CCTAAAGAGCTAGGCA-1  | 1919 | 11168 | 7  |
| Donor3-CCTAAAGAGTCCCACG-1  | 5801 | 28616 | 5  |
| Donor3-CCTAAAGTCAGCCTAA-1  | 1725 | 12556 | 8  |
| Donor3-CCTACACAGTCCGTAT-1  | 3405 | 7986  | 3  |
| Donor3-CCTACACGTCATATGC-1  | 1285 | 4463  | 13 |
| Donor3-CCTACACGTTTCGCTAA-1 | 1413 | 4461  | 8  |
| Donor3-CCTACCAAGGTTCCCTA-1 | 2607 | 5993  | 2  |
| Donor3-CCTAGCTGTCATGCCG-1  | 4594 | 26325 | 13 |
| Donor3-CCTAGCTGTCTCATCC-1  | 2476 | 10533 | 9  |
| Donor3-CCTAGCTGTGATGCC-1   | 1283 | 6390  | 8  |
| Donor3-CCTCAGTGTACTCGCG-1  | 1767 | 5674  | 13 |
| Donor3-CCTCAGTGTGCCTGCA-1  | 2908 | 8979  | 10 |
| Donor3-CCTCAGTTCCTGACT-1   | 1193 | 5828  | 8  |
| Donor3-CCTCTGAAGATGAGAG-1  | 2942 | 5979  | 3  |
| Donor3-CCTCTGAAGGTCATCT-1  | 2643 | 5789  | 2  |
| Donor3-CCTCTGAAGTTTCGCAT-1 | 2367 | 5010  | 3  |
| Donor3-CCTTACGAGAGGTACC-1  | 2106 | 6953  | 6  |
| Donor3-CCTTACGAGTGGTCCC-1  | 1473 | 4707  | 9  |
| Donor3-CCTTACGGTCTCTTAT-1  | 4201 | 13678 | 5  |
| Donor3-CCTTCGAGTAATCACC-1  | 1671 | 5415  | 6  |
| Donor3-CCTTCGAGTCCAATA-1   | 2547 | 8627  | 13 |
| Donor3-CCTTCGATCACTCCTG-1  | 1623 | 6912  | 7  |
| Donor3-CCTTCGATCGAGAACG-1  | 1111 | 4703  | 8  |
| Donor3-CCTTTCTCACTTACGA-1  | 1479 | 6849  | 7  |
| Donor3-CCTTTCTGTTCGGGTCT-1 | 1534 | 5667  | 9  |
| Donor3-CCTTTCTGTTGTGGAG-1  | 3951 | 9717  | 3  |
| Donor3-CCTTTCTTCACGAAGG-1  | 1443 | 9617  | 8  |
| Donor3-CCTTTCTTCCTTCAAT-1  | 1219 | 5180  | 8  |
| Donor3-CCTTTCTTCGAATGCT-1  | 3923 | 13807 | 6  |
| Donor3-CGAACATAGTCAATAG-1  | 1787 | 9710  | 7  |
| Donor3-CGAACATTCGCATCT-1   | 1048 | 4499  | 8  |
| Donor3-CGAATGTAGACGCAAC-1  | 4446 | 15637 | 2  |
| Donor3-CGAATGTAGAGACTTA-1  | 1082 | 4464  | 7  |

|                            |      |       |    |
|----------------------------|------|-------|----|
| Donor3-CGAATGTAGTTGTCGT-1  | 6207 | 24534 | 1  |
| Donor3-CGAATGTTTCAGGCGAA-1 | 2157 | 8603  | 7  |
| Donor3-CGAATGTTCCACGACG-1  | 4825 | 14138 | 4  |
| Donor3-CGAATGTTCCGTCATC-1  | 3878 | 20524 | 7  |
| Donor3-CGACCTTAGAGCCCAA-1  | 8054 | 46803 | 5  |
| Donor3-CGACCTTGTATTAGCC-1  | 2498 | 13607 | 7  |
| Donor3-CGACCTTTCCAGAAGG-1  | 1358 | 7532  | 8  |
| Donor3-CGACTTCAGGATATAC-1  | 5862 | 33096 | 4  |
| Donor3-CGACTTCAGTGGACGT-1  | 1024 | 4977  | 8  |
| Donor3-CGACTTCCACTTACGA-1  | 1311 | 8401  | 8  |
| Donor3-CGACTTCCAGTACACT-1  | 3807 | 10488 | 5  |
| Donor3-CGAGAAGAGATCCCGC-1  | 2205 | 4539  | 13 |
| Donor3-CGAGAAGAGCGATTCT-1  | 2345 | 14114 | 7  |
| Donor3-CGAGAAGGTAGAGTGC-1  | 2695 | 5561  | 3  |
| Donor3-CGAGCACCAATGTTGC-1  | 1552 | 6952  | 7  |
| Donor3-CGATCGGGTAGTACCT-1  | 1252 | 5121  | 7  |
| Donor3-CGATCGGTCCCGACTT-1  | 1676 | 7568  | 7  |
| Donor3-CGATCGGTCTGCTGATA-1 | 7090 | 42539 | 6  |
| Donor3-CGATCGGTCTGATCAG-1  | 3455 | 8831  | 3  |
| Donor3-CGATGGCGTCTAAACC-1  | 2478 | 18139 | 8  |
| Donor3-CGATGTACATCAGTCA-1  | 1666 | 7532  | 7  |
| Donor3-CGATTGAAGCGTCAAG-1  | 2078 | 6815  | 9  |
| Donor3-CGATTGAGTGTTGAGG-1  | 6067 | 24460 | 5  |
| Donor3-CGCCAAGAGCCAGAAC-1  | 2330 | 6830  | 10 |
| Donor3-CGCCAAGCATGTCTCC-1  | 1590 | 5283  | 9  |
| Donor3-CGCCAAGTCCAGTAGT-1  | 6217 | 50635 | 6  |
| Donor3-CGCGGTACAGCCAATT-1  | 2137 | 6319  | 13 |
| Donor3-CGCGGTATCCGCTGTT-1  | 4873 | 15231 | 4  |
| Donor3-CGCGTTTTAGTAGTGCG-1 | 3976 | 10717 | 5  |
| Donor3-CGCGTTTTCAAGCTGTT-1 | 2152 | 11081 | 7  |
| Donor3-CGCGTTTTCATTTGCTT-1 | 3280 | 7615  | 3  |
| Donor3-CGCTATCAGCGTTTAC-1  | 1613 | 6291  | 7  |
| Donor3-CGCTGGAAGATCTGCT-1  | 4073 | 28724 | 7  |
| Donor3-CGCTGGAGTCTAGCCG-1  | 2068 | 5931  | 13 |
| Donor3-CGCTGGAGTGTTGAGG-1  | 1475 | 5144  | 6  |
| Donor3-CGCTTCAGTAAACACA-1  | 1931 | 8577  | 7  |
| Donor3-CGCTTCATCTAACCGA-1  | 3291 | 7126  | 3  |
| Donor3-CGGACACTCAGGATCT-1  | 4208 | 10785 | 3  |
| Donor3-CGGACGTAGGCAGTCA-1  | 2356 | 9958  | 9  |
| Donor3-CGGACGTCAAGTTAAG-1  | 1324 | 6313  | 8  |
| Donor3-CGGACGTTTCGGATGGA-1 | 1649 | 4882  | 13 |
| Donor3-CGGACTGAGTGCGTGA-1  | 1529 | 8894  | 8  |
| Donor3-CGGACTGCAGAGTGTG-1  | 2935 | 19926 | 7  |
| Donor3-CGGACTGTCTCGCATC-1  | 2334 | 6667  | 11 |
| Donor3-CGGAGCTGTTAAGATG-1  | 3450 | 8453  | 3  |
| Donor3-CGGAGCTGTTGGGACA-1  | 2330 | 16516 | 7  |
| Donor3-CGGAGTCAGCTTCGCG-1  | 2885 | 6809  | 6  |
| Donor3-CGGAGTCAGGTTACCT-1  | 1089 | 6286  | 8  |
| Donor3-CGGCTAGAGCCACCTG-1  | 1969 | 11266 | 7  |
| Donor3-CGGCTAGTCGGTGTCG-1  | 3281 | 7333  | 3  |
| Donor3-CGGGTCAAGAAGGCCT-1  | 1706 | 6594  | 9  |
| Donor3-CGGGTCATCACCAGGC-1  | 2576 | 5549  | 5  |
| Donor3-CGGGTCATCCATGCTC-1  | 2901 | 9271  | 5  |
| Donor3-CGGGTCATCCCGACTT-1  | 1257 | 4944  | 8  |
| Donor3-CGGTTAAGTGCTAGCC-1  | 1957 | 17520 | 8  |
| Donor3-CGGTTAATCCAAAGTC-1  | 3747 | 18985 | 6  |

|                           |      |       |    |
|---------------------------|------|-------|----|
| Donor3-CGGTTAATCTGGCGAC-1 | 3026 | 6556  | 5  |
| Donor3-CGTCACTAGGGATACC-1 | 1779 | 7063  | 9  |
| Donor3-CGTCACTCACTATCTT-1 | 3793 | 9930  | 5  |
| Donor3-CGTCACTCACTCGACG-1 | 2249 | 15724 | 7  |
| Donor3-CGTCAGGAGCACAGGT-1 | 4031 | 10535 | 5  |
| Donor3-CGTCAGGCAGTATGCT-1 | 1406 | 4285  | 13 |
| Donor3-CGTCCATTCAGCGATT-1 | 1076 | 5437  | 8  |
| Donor3-CGTCCATTCCAGAAGG-1 | 1237 | 5662  | 8  |
| Donor3-CGTCTACGTATAGGTA-1 | 2044 | 6094  | 12 |
| Donor3-CGTCTACGTGTCCTCT-1 | 2586 | 8780  | 11 |
| Donor3-CGTGAGCAGCAGGTCA-1 | 2775 | 9917  | 10 |
| Donor3-CGTGAGCGTGTATGGG-1 | 5710 | 32672 | 5  |
| Donor3-CGTGAGCTCTGCGACG-1 | 4337 | 12151 | 6  |
| Donor3-CGTGTAAAGAAGGCCT-1 | 1333 | 8215  | 8  |
| Donor3-CGTGTAAGTAAACGCG-1 | 1124 | 5149  | 8  |
| Donor3-CGTGTCTCAGTCAGAG-1 | 1139 | 6103  | 8  |
| Donor3-CGTGTCTTCCGTACAA-1 | 3229 | 7535  | 3  |
| Donor3-CGTTAGAAGTTTCCTT-1 | 2519 | 13868 | 7  |
| Donor3-CGTTAGAGTCGCGGTT-1 | 1329 | 6940  | 8  |
| Donor3-CGTTCTGCAATGTTGC-1 | 1095 | 4347  | 8  |
| Donor3-CGTTCTGGTAAATGAC-1 | 1489 | 9527  | 8  |
| Donor3-CGTTCTGGTATCTGCA-1 | 3248 | 9366  | 10 |
| Donor3-CGTTCTGTCCAGTATG-1 | 1175 | 6882  | 8  |
| Donor3-CGTTCTGTCTAACGGT-1 | 3287 | 11836 | 6  |
| Donor3-CGTTGGGAGTTTGCGT-1 | 2991 | 6393  | 3  |
| Donor3-CTAACTTTCACGACG-1  | 7002 | 34430 | 5  |
| Donor3-CTAACTTTCGATGAGG-1 | 2073 | 4540  | 3  |
| Donor3-CTAAGACGTGCGAAAC-1 | 1745 | 6743  | 9  |
| Donor3-CTAATGGAGAGTCTGG-1 | 3377 | 12869 | 4  |
| Donor3-CTAATGGCAAAGCGGT-1 | 3102 | 26127 | 8  |
| Donor3-CTAATGGCATTGGCGC-1 | 2592 | 13932 | 7  |
| Donor3-CTACACCAGCTGAACG-1 | 1016 | 4545  | 8  |
| Donor3-CTACACCTCTTTACGT-1 | 1330 | 5727  | 7  |
| Donor3-CTACATTCATCGGAAG-1 | 2927 | 15653 | 7  |
| Donor3-CTACATTTCAATAAGG-1 | 1189 | 5756  | 8  |
| Donor3-CTACCCACAACACCCG-1 | 4611 | 14223 | 4  |
| Donor3-CTACCCAGTGACCAAG-1 | 2651 | 10646 | 6  |
| Donor3-CTACCCATCGATCCCT-1 | 2755 | 9552  | 10 |
| Donor3-CTACGTCTCCCGACTT-1 | 1650 | 4907  | 10 |
| Donor3-CTACGTCTCTATCCTA-1 | 7934 | 49205 | 5  |
| Donor3-CTAGAGTAGACTGGGT-1 | 2031 | 6139  | 10 |
| Donor3-CTAGAGTAGCCACCTG-1 | 1916 | 9302  | 7  |
| Donor3-CTAGAGTCAACACCTA-1 | 4430 | 20957 | 6  |
| Donor3-CTAGCCTCAGCGTTCG-1 | 2561 | 5536  | 3  |
| Donor3-CTAGCCTTCGGTTAAC-1 | 3350 | 7897  | 3  |
| Donor3-CTAGTGATCCCTCAGT-1 | 1636 | 13209 | 8  |
| Donor3-CTCAGAAGTTACGGAG-1 | 1809 | 5915  | 6  |
| Donor3-CTCATTAGTGCAGTAG-1 | 2192 | 5608  | 11 |
| Donor3-CTCCTAGGTGAGTATA-1 | 4344 | 10886 | 6  |
| Donor3-CTCCTAGTCGCGTTTC-1 | 3804 | 9487  | 3  |
| Donor3-CTCGAAACACGTGAGA-1 | 3590 | 8098  | 6  |
| Donor3-CTCGAAATCGCCAGCA-1 | 1096 | 4564  | 7  |
| Donor3-CTCGAGGTCACCGGGT-1 | 5451 | 27922 | 6  |
| Donor3-CTCGGAGGTTGGAGGT-1 | 1911 | 6515  | 8  |
| Donor3-CTCGGAGTCGGATGTT-1 | 1100 | 4936  | 8  |
| Donor3-CTCGGGATCGAACTGT-1 | 3556 | 9183  | 13 |

Donor3-CTCGTACTCGTTACGA-1 1340 4603 7  
Donor3-CTCTAATCACATGACT-1 2027 5883 10  
Donor3-CTCTAATGTTAAGATG-1 1372 4542 7  
Donor3-CTCTAATTTCCCAGGTG-1 1725 4771 13  
Donor3-CTCTGGTAGAGGTTAT-1 1604 4680 13  
Donor3-CTCTGGTGTACTTAGC-1 5032 15818 5  
Donor3-CTCTGGTGTAGGGTAC-1 4828 15516 6  
Donor3-CTGAAACAGCCACGCT-1 1421 7092 8  
Donor3-CTGAAACAGTAGGCCA-1 1403 6785 7  
Donor3-CTGAAACCACTTGGAT-1 2926 6950 6  
Donor3-CTGAAACTCCCTAATT-1 3575 8425 4  
Donor3-CTGAAGTTCTACTTAC-1 1711 8852 8  
Donor3-CTGATAGGTAAGTGGC-1 7636 39484 6  
Donor3-CTGATAGGTACTCGCG-1 2717 5412 5  
Donor3-CTGATCCAGATGTCGG-1 1823 13147 8  
Donor3-CTGATCCTCCGAACGC-1 4421 18852 6  
Donor3-CTGCCTAGTATCACCA-1 2004 4719 6  
Donor3-CTGCGGACAATTGCTG-1 4757 23817 6  
Donor3-CTGCGGACAGGTCGTC-1 3614 8969 2  
Donor3-CTGCGGAGTAGAGCTG-1 3194 7314 3  
Donor3-CTGCGGAGTCGTTGTA-1 2317 10861 12  
Donor3-CTGCGGATCCTCAACC-1 2090 4837 4  
Donor3-CTGCGGATCGGATGTT-1 4354 40497 7  
Donor3-CTGCTGTCAACACCTA-1 2366 4636 3  
Donor3-CTGCTGTTCTTAGAGC-1 1109 4900 8  
Donor3-CTGTGCTAGCCATCGC-1 3528 12123 10  
Donor3-CTGTGCTCAAGCCATT-1 3911 9571 2  
Donor3-CTGTGCTCAGACTCGC-1 2315 12078 7  
Donor3-CTGTGCTCAGCGAACA-1 2589 14154 8  
Donor3-CTGTGCTTCCACGTTT-1 1287 4730 9  
Donor3-CTGTGCTTCCGCAGTG-1 6856 45648 5  
Donor3-CTGTTTAAGAGGGATA-1 6656 26261 5  
Donor3-CTGTTTAGTACAAGTA-1 2399 12428 7  
Donor3-CTGTTTAGTATGAAAC-1 6176 26490 2  
Donor3-CTGTTTAGTATTACCG-1 5807 21778 6  
Donor3-CTTACCGAGGATATAC-1 1520 6179 9  
Donor3-CTTACCGGTACAGACG-1 4935 16478 4  
Donor3-CTTACCGTCAGCACAT-1 2684 8117 4  
Donor3-CTTACCGTCAGCGACC-1 3174 15702 7  
Donor3-CTTACCGTCATGCTCC-1 1271 5493 8  
Donor3-CTTACCGTCATGTGGT-1 2701 13837 7  
Donor3-CTTACCGTCCAGATCA-1 8716 85471 6  
Donor3-CTTAGGAAGAAACCGC-1 6603 29120 6  
Donor3-CTTAGGACACCCATGG-1 2221 13502 7  
Donor3-CTTAGGAGTTGGACCC-1 2522 5965 5  
Donor3-CTTAGGATCCAGGGCT-1 2021 7127 13  
Donor3-CTTCTCTAGAGCTGCA-1 4025 10584 4  
Donor3-CTTGGCTAGCGCCTTG-1 5613 19766 2  
Donor3-CTTGGCTCAGGGAGAG-1 1359 5659 7  
Donor3-CTTGGCTGTCGACTGC-1 8513 63748 6  
Donor3-CTTTGCGGTCTAAAGA-1 5845 21606 5  
Donor3-CTTTGCGTCATTTGGG-1 2187 13478 7  
Donor3-GAAACTCCAGTTTACG-1 6203 36160 6  
Donor3-GAAACTCTCTAACGGT-1 2566 5803 6  
Donor3-GAAATGAAGGGCTTGA-1 7245 34199 5  
Donor3-GAAATGACACCTGGTG-1 6365 55187 6

Donor3-GAAATGAGTGTCAATC-1 926 4309 8  
Donor3-GAAATGATCATGCAAC-1 1183 5716 8  
Donor3-GAACATCAGCTGAACG-1 1500 4378 9  
Donor3-GAACCTACAAGCCGTC-1 1617 5470 9  
Donor3-GAACCTATCACAATGC-1 6392 25301 2  
Donor3-GAACCTATCGTTACGA-1 1189 6323 8  
Donor3-GAACCTATCTCTGCTG-1 1471 5324 7  
Donor3-GAACGGAAGGAATTAC-1 4169 17707 4  
Donor3-GAACGGAGTCCATGAT-1 1602 7719 8  
Donor3-GAACGGAGTGTTTGTG-1 3963 10043 1  
Donor3-GAACGGATCAACTCTT-1 1753 4615 11  
Donor3-GAAGCAGCAATAGAGT-1 1902 5055 13  
Donor3-GAAGCAGCAGTCCTTC-1 4573 19337 6  
Donor3-GAAGCAGGTTACCTC-1 5402 20242 2  
Donor3-GAAGCAGTCAGTACGT-1 1869 6156 13  
Donor3-GAAGCAGTCCAAACTG-1 8020 96922 5  
Donor3-GAAGCAGTCGGCTACG-1 1319 4372 7  
Donor3-GAATAAGTCTCATTC-1 2982 7607 5  
Donor3-GAATGAAGTTCGGCAC-1 3048 15631 7  
Donor3-GAATGAATCCCTTGTG-1 5112 17553 2  
Donor3-GACACGCTCATCTGTT-1 2296 9804 7  
Donor3-GACAGAGAGGGAAACA-1 6507 23709 5  
Donor3-GACAGAGGTGGACGAT-1 3026 9775 10  
Donor3-GACAGAGTCATATCGG-1 7722 78589 4  
Donor3-GACCAATTCATGCTCC-1 2428 5236 3  
Donor3-GACGCGTGTCAATACC-1 5856 22752 6  
Donor3-GACGGCTAGAAGGGTA-1 2330 7389 12  
Donor3-GACGGCTCAGACAAGC-1 1629 4462 13  
Donor3-GACGGCTGTCCGAAGA-1 1080 4306 8  
Donor3-GACGGCTGTCCGCTGA-1 3271 7907 3  
Donor3-GACGTTAAGCACCGCT-1 5261 18438 1  
Donor3-GACTAACAGGCCATAG-1 3755 9550 3  
Donor3-GACTAACAGGCGATAC-1 2578 6977 11  
Donor3-GACTAACCAATCGAAA-1 1199 5442 8  
Donor3-GACTAACCAGCTTAAC-1 4032 20663 6  
Donor3-GACTACAAGTGGACGT-1 1580 5870 9  
Donor3-GACTACAAGTTCGCGC-1 1323 5149 8  
Donor3-GACTGCGGTGTGGCTC-1 3172 17333 7  
Donor3-GAGTCCGCATGTTGAC-1 2783 11960 7  
Donor3-GAGTCCGTCTGTTTGT-1 2576 5056 2  
Donor3-GATCAGTGTATAATGG-1 1990 4832 4  
Donor3-GATCAGTTCACCAGGC-1 1447 8489 8  
Donor3-GATCGATGTCTACCTC-1 1499 4383 13  
Donor3-GATCGCGCATAACCTG-1 3050 6795 2  
Donor3-GATCGCGTCGGTCTAA-1 1859 10582 7  
Donor3-GATCGTACATCGATTG-1 1937 10571 7  
Donor3-GATCGTATCAATCTCT-1 1640 7995 8  
Donor3-GATCTAGCACAAAGACG-1 1335 4616 7  
Donor3-GATCTAGGTCTCTTAT-1 3473 9111 6  
Donor3-GATCTAGTCTGTACGA-1 3796 9883 3  
Donor3-GATGAAACAGAGTGTG-1 1400 4609 7  
Donor3-GATGAAAGTCAACTGT-1 1977 10213 7  
Donor3-GATGAAATCAACACGT-1 1515 6663 7  
Donor3-GATGAGGAGTAGGTGC-1 2237 13433 7  
Donor3-GATGAGGGTAAGTGTA-1 1498 4510 13  
Donor3-GATGAGGGTCAGCTAT-1 3113 13843 6

Donor3-GATGAGGGTCCCTTGT-1 2094 6919 6  
Donor3-GATGAGGGTCGGCACT-1 1899 9950 7  
Donor3-GATGCTATCTGTCTAT-1 1470 4501 13  
Donor3-GATTCAGGTAGCGATG-1 3757 10774 2  
Donor3-GATTCAGGTGACTACT-1 2818 11646 6  
Donor3-GCAAAGTACGGGATACC-1 2752 5956 4  
Donor3-GCAAAGTGTCACTTCC-1 1957 7641 7  
Donor3-GCAATCAAGACTAAGT-1 3139 16147 7  
Donor3-GCAATCAGTAAACACA-1 2365 16267 8  
Donor3-GCACATAGTTAGAACA-1 4712 15085 1  
Donor3-GCACTCTGTTCGAGTTT-1 1475 4421 13  
Donor3-GCACTCTGTTTAGGAA-1 3793 10243 3  
Donor3-GCACTCTTCAAGGTAA-1 2012 6216 13  
Donor3-GCAGCCACAAATTGCC-1 4812 19326 6  
Donor3-GCAGCCACAGGACGTA-1 2174 14081 8  
Donor3-GCAGCCAGTTCGCATAT-1 7015 60514 6  
Donor3-GCAGCCAGTTAAGTAG-1 5323 16733 3  
Donor3-GCAGTTAGTCTGATCA-1 1648 6248 8  
Donor3-GCATAACACACAAGTAA-1 3308 11756 5  
Donor3-GCATAACAGTGCCTGCA-1 3714 10251 2  
Donor3-GCATGATAGTACGATA-1 5186 34263 6  
Donor3-GCATGATCACTGTGTA-1 1974 7476 7  
Donor3-GCATGATGTACGAAAT-1 3231 16774 7  
Donor3-GCATGATTCGATAGAA-1 3582 7921 3  
Donor3-GCATGCGCACGAAAGC-1 2073 8414 9  
Donor3-GCATGCGGTAACGTTC-1 1755 4331 10  
Donor3-GCATGCGGTCCGCTGA-1 4097 18506 6  
Donor3-GCATGCGGTGCCTGCA-1 1397 6770 8  
Donor3-GCATGCGGTGTGAAAT-1 1349 6793 8  
Donor3-GCCAAATCACAAAGCCC-1 4887 14315 6  
Donor3-GCCAAATCACTAGTAC-1 4019 10579 3  
Donor3-GCCAAATCAGGGTACA-1 1852 5774 9  
Donor3-GCCAAATCAGTCGATT-1 4457 18953 6  
Donor3-GCCAAATTCTCCAACC-1 5717 20588 6  
Donor3-GCCTCTAGTAGCTCCG-1 1967 9263 7  
Donor3-GCCTCTATCTAACTTC-1 3364 7168 2  
Donor3-GCCTCTATCTATCGCC-1 3797 9091 3  
Donor3-GCGACCAAGCCGCCTA-1 1563 10363 8  
Donor3-GCGACCAAGTGAAGTT-1 1133 5584 8  
Donor3-GCGACCAGTCGCCATG-1 9076 69585 1  
Donor3-GCGAGAAGTGGACGAT-1 2573 11056 6  
Donor3-GCGAGAATCGTCTGAA-1 6712 27828 1  
Donor3-GCGCAACCAGATGGGT-1 1926 6556 9  
Donor3-GCGCAACCATCCAACA-1 2439 6771 13  
Donor3-GCGCAGTCAAATACAG-1 1456 4270 13  
Donor3-GCGCCAACATTTCACT-1 2630 9169 10  
Donor3-GCGCCAAGTCGGCATC-1 3941 9734 5  
Donor3-GCGCGATAGGCGACAT-1 4743 14593 3  
Donor3-GCGCGATGTTCGTGGCT-1 1407 4783 13  
Donor3-GCGCGATGTTGTACAC-1 3127 17083 7  
Donor3-GCGCGATTCAGCTTAG-1 1029 4481 8  
Donor3-GCGGGTTGTTACGGC-1 3007 6555 3  
Donor3-GCGGGTTCCCGGATG-1 1708 5031 13  
Donor3-GCTCCTACAGTCACTA-1 1789 5816 13  
Donor3-GCTCCTAGTAGGCTGA-1 7473 44437 5  
Donor3-GCTCCTATCATGCTCC-1 1761 5330 9



Donor3-GCTCTGTCAATGGTCT-1 2312 12103 7  
Donor3-GCTCTGTGTCGTCTTC-1 3291 6904 6  
Donor3-GCTCTGTTCTTGCAAG-1 7863 60544 6  
Donor3-GCTGCAGGTACTTGAC-1 1746 5788 13  
Donor3-GCTGCAGGTTCTGTTT-1 3387 8090 3  
Donor3-GCTGCTTCATGTCGAT-1 2215 11987 7  
Donor3-GCTGGGTCAAGGCTCC-1 2111 8342 7  
Donor3-GCTGGGTGTCAAACCTC-1 5324 17380 2  
Donor3-GCTGGGTGTTCCACAA-1 1688 8143 7  
Donor3-GCTTCCAAGTCGTTTG-1 3385 23721 8  
Donor3-GCTTGAAAGAGCTGCA-1 2655 13598 7  
Donor3-GCTTGAAAGCCGGTAA-1 1387 4796 13  
Donor3-GCTTGAAAGGCTCAGA-1 6151 25512 5  
Donor3-GCTTGAAACAGCTCGCA-1 2600 9445 6  
Donor3-GCTTGAAATCTCTTATG-1 2120 11700 8  
Donor3-GGAAAGCGTACCCAAT-1 1648 7304 7  
Donor3-GGAAAGCGTGTGCGTC-1 1186 4930 7  
Donor3-GGAAAGCGTTCCCGAG-1 1412 5506 7  
Donor3-GGAACTTAGTACGTAA-1 1439 8372 8  
Donor3-GGAACTTGTGGTCTCG-1 1524 9922 8  
Donor3-GGAATAACATGGAATA-1 4441 20187 5  
Donor3-GGAATAAGTACTCAAC-1 1161 4401 8  
Donor3-GGAATAATCAGATAAG-1 3503 8264 3  
Donor3-GGAATAATCCTAGTGA-1 963 4463 8  
Donor3-GGACAGAAGTGAATTG-1 4904 16407 2  
Donor3-GGACAGAGTGATGATA-1 2639 9888 6  
Donor3-GGACAGAGTTCAGGCC-1 3401 12257 4  
Donor3-GGACAGATCTTGTATC-1 3813 9260 3  
Donor3-GGACATTAGTTTCCTT-1 2240 13586 7  
Donor3-GGACGTGCGTGTGCGTC-1 5139 16344 2  
Donor3-GGACGTCTCAGGATCT-1 3578 8131 4  
Donor3-GGACGTCTCAGTTGAC-1 3750 9746 3  
Donor3-GGATGTTAGAGACTAT-1 1781 9086 7  
Donor3-GGATTACTCGGCTTGG-1 5486 22654 5  
Donor3-GGCAATTAGATGTTAG-1 1570 8509 8  
Donor3-GGCAATTGTATTACCG-1 1249 4957 7  
Donor3-GGCAATTGTCGCGTGT-1 1258 4836 7  
Donor3-GGCAATTTCTCAATT-1 1016 5539 8  
Donor3-GGCAATTTCTAACTTC-1 2731 5883 5  
Donor3-GGCCGATAGGAGTAGA-1 3143 6353 6  
Donor3-GGCCGATGTACCTACA-1 3851 18301 4  
Donor3-GGCCGATTCGTGGTTCG-1 2279 10191 7  
Donor3-GGCCGATTCTCCTATA-1 1451 4347 13  
Donor3-GGCCGATTCTTCTGGC-1 2151 16528 8  
Donor3-GGCGACTAGACTTTCG-1 1574 6512 7  
Donor3-GGCGACTGTGGGTCAA-1 5366 45490 7  
Donor3-GGCGTGTGTGTGAAAT-1 942 4433 8  
Donor3-GGCTCGAAGCCTTGAT-1 2495 12512 7  
Donor3-GGCTCGACATATGCTG-1 8001 46889 6  
Donor3-GGCTCGAGTACAAGTA-1 2812 5908 3  
Donor3-GGCTCGATCACTATTC-1 2596 9229 6  
Donor3-GGGAATGAGAATTCCC-1 2577 8046 11  
Donor3-GGGAATGCACGACGAA-1 2637 7240 10  
Donor3-GGGAATGCACTGTGTA-1 1221 4710 8  
Donor3-GGGAATGTCTTGAGGT-1 3965 12285 6  
Donor3-GGGACCTCATTCTTAC-1 6214 24104 6

|                            |      |       |    |
|----------------------------|------|-------|----|
| Donor3-GGGAGATCACCAGTTA-1  | 5008 | 34671 | 6  |
| Donor3-GGGAGATGTCAAGCGA-1  | 1927 | 5209  | 13 |
| Donor3-GGGAGATTCTGTCTCG-1  | 1757 | 6208  | 9  |
| Donor3-GGGATGAAGAGCTATA-1  | 4313 | 13190 | 6  |
| Donor3-GGGATGACATGGGAAC-1  | 1520 | 5498  | 7  |
| Donor3-GGGCACTCAGGATCGA-1  | 2331 | 4752  | 5  |
| Donor3-GGGCACTTCGATCCCT-1  | 1347 | 4422  | 9  |
| Donor3-GGGCATCGTCCAGTGC-1  | 1440 | 6204  | 8  |
| Donor3-GGGCATCGTTACGCGC-1  | 2074 | 14953 | 8  |
| Donor3-GGGTCTGAGATCTGCT-1  | 7611 | 55848 | 6  |
| Donor3-GGGTCTGCAAGGGTCA-1  | 6407 | 32814 | 5  |
| Donor3-GGGTCTGCAGACTCGC-1  | 3588 | 9553  | 6  |
| Donor3-GGGTCTGGTGTGAAAT-1  | 1670 | 5371  | 6  |
| Donor3-GGGTCTGTCCGGCACA-1  | 6994 | 32512 | 6  |
| Donor3-GGGTTGCAGAGTACAT-1  | 2296 | 15507 | 7  |
| Donor3-GGGTTGCCACTACAGT-1  | 4571 | 14397 | 3  |
| Donor3-GGGTTGCGTCCGGCTCA-1 | 1654 | 4292  | 10 |
| Donor3-GGTATTGCAGCCAATT-1  | 3489 | 8755  | 3  |
| Donor3-GGTATTGTCCTCTAGC-1  | 4661 | 15543 | 1  |
| Donor3-GGTGAAGCAGTAAGCG-1  | 1588 | 5299  | 10 |
| Donor3-GGTGAAGCATCACGTA-1  | 3437 | 9955  | 5  |
| Donor3-GGTGAAGTCAACACCA-1  | 2299 | 7658  | 11 |
| Donor3-GGTGAAGTCAGCTCGG-1  | 956  | 4528  | 8  |
| Donor3-GGTGCGTAGACGACGT-1  | 3005 | 17907 | 7  |
| Donor3-GGTGCGTCAAAGGTGC-1  | 1947 | 14729 | 8  |
| Donor3-GGTGCGTGTCTTCTCG-1  | 1462 | 5767  | 7  |
| Donor3-GGTGTTAGTGATAAAC-1  | 2399 | 5032  | 6  |
| Donor3-GGTGTTAGTGCACGAA-1  | 2403 | 7593  | 13 |
| Donor3-GTAACGTTCCGTAGTA-1  | 2480 | 4596  | 3  |
| Donor3-GTAACGTTCTGAAAGA-1  | 4143 | 11872 | 1  |
| Donor3-GTAACTGAGACAGAGA-1  | 1732 | 8986  | 7  |
| Donor3-GTAACTGAGGAGCGAG-1  | 1888 | 5747  | 10 |
| Donor3-GTAACTGAGTGGACGT-1  | 1306 | 4852  | 7  |
| Donor3-GTAACTGCACCACGTG-1  | 4746 | 14008 | 5  |
| Donor3-GTAACTGGTCGAATCT-1  | 3431 | 10681 | 6  |
| Donor3-GTAACTGGTCTCAACA-1  | 5317 | 19388 | 5  |
| Donor3-GTACTCCCAGATAATG-1  | 1469 | 6275  | 7  |
| Donor3-GTACTCCGTGCCCTTGG-1 | 2777 | 10305 | 6  |
| Donor3-GTACTCCTCGACCAGC-1  | 5531 | 20160 | 5  |
| Donor3-GTACTTTAGGCGATAC-1  | 1850 | 5697  | 13 |
| Donor3-GTACTTTTCTCGGACG-1  | 2214 | 8801  | 9  |
| Donor3-GTAGGCCACATCCAA-1   | 4316 | 12545 | 2  |
| Donor3-GTAGGCCAGCTGTAT-1   | 1243 | 6298  | 8  |
| Donor3-GTAGGCCGTTCAGCGC-1  | 1654 | 5437  | 13 |
| Donor3-GTAGGCCTCAAAGACA-1  | 6063 | 26673 | 4  |
| Donor3-GTAGTCAGTCGAATCT-1  | 1741 | 5875  | 9  |
| Donor3-GTATTCTAGCTGCAAG-1  | 1780 | 5198  | 7  |
| Donor3-GTATTCTCACGTTGGC-1  | 1346 | 4510  | 9  |
| Donor3-GTATTCTCAGCTGCTG-1  | 1552 | 5024  | 7  |
| Donor3-GTATTCTGTGTTAAGA-1  | 1668 | 5625  | 13 |
| Donor3-GTATTCTGTTCTGTTT-1  | 2393 | 4430  | 6  |
| Donor3-GTATTCTTCGGAGCAA-1  | 5082 | 15989 | 5  |
| Donor3-GTCAAGTAGGGCTCTC-1  | 2742 | 24178 | 8  |
| Donor3-GTCAAGTAGGTGTGGT-1  | 1532 | 5118  | 13 |
| Donor3-GTCAAGTCAGGATCGA-1  | 1837 | 6860  | 7  |
| Donor3-GTCAAGTTCGCGTTT-1   | 1343 | 6463  | 8  |

|                            |      |       |    |
|----------------------------|------|-------|----|
| Donor3-GTCACAAAGCTAGTCT-1  | 2744 | 7340  | 12 |
| Donor3-GTCACAACAGCTGTGC-1  | 5156 | 17340 | 2  |
| Donor3-GTCACAATCAACCAAC-1  | 3585 | 7821  | 1  |
| Donor3-GTCATTTAGGGATACC-1  | 1211 | 4912  | 7  |
| Donor3-GTCATTTAGGGCTCTC-1  | 2345 | 15649 | 7  |
| Donor3-GTCATTTGTCCAAGTT-1  | 7041 | 27514 | 1  |
| Donor3-GTCCTCAAGACACGAC-1  | 4468 | 13915 | 5  |
| Donor3-GTCCTCAGTGAGCGAT-1  | 2052 | 10999 | 7  |
| Donor3-GTCGGGTCCGCAAGC-1   | 6218 | 22796 | 3  |
| Donor3-GTCGTAAAGCTAGTCT-1  | 4369 | 12120 | 1  |
| Donor3-GTCGTAAAGGACAGAA-1  | 1910 | 5105  | 13 |
| Donor3-GTCGTAAACACCAGATT-1 | 5505 | 19901 | 6  |
| Donor3-GTCGTAAACATTGGTAC-1 | 3001 | 15899 | 7  |
| Donor3-GTCGTAAAGTCGACTAT-1 | 4969 | 15827 | 6  |
| Donor3-GTCGTAAAGTTGGTGGA-1 | 1393 | 6296  | 8  |
| Donor3-GTCTCGTTCTTACCGC-1  | 1096 | 4535  | 8  |
| Donor3-GTCTTCGCAAGTCATC-1  | 5623 | 21489 | 4  |
| Donor3-GTCTTCGCATAAGACA-1  | 3698 | 9867  | 1  |
| Donor3-GTCTTCGCATCTATGG-1  | 3989 | 9403  | 2  |
| Donor3-GTCTTCGGTTCGGCAC-1  | 1549 | 7027  | 8  |
| Donor3-GTCTTCGTCGTCTGCT-1  | 2500 | 5927  | 6  |
| Donor3-GTGAAGGGTCTCTCTG-1  | 1520 | 9332  | 8  |
| Donor3-GTGCAGCCAGAAGCAC-1  | 3623 | 9188  | 3  |
| Donor3-GTGCAGCCATTCCCTCG-1 | 7145 | 53582 | 6  |
| Donor3-GTGCAGCTCGCCATAA-1  | 7863 | 41882 | 6  |
| Donor3-GTGCAGCTCGTTACGA-1  | 1371 | 7014  | 8  |
| Donor3-GTGCATAAGCTAAACA-1  | 3568 | 8799  | 3  |
| Donor3-GTGCATACAGTAAGCG-1  | 2394 | 11518 | 7  |
| Donor3-GTGCATACATCACGTA-1  | 1709 | 6956  | 7  |
| Donor3-GTGCATACATTTCACT-1  | 1589 | 4914  | 9  |
| Donor3-GTGCATACATTTGCTT-1  | 3911 | 9796  | 2  |
| Donor3-GTGCGGTAGTACACCT-1  | 7602 | 42282 | 1  |
| Donor3-GTGCGGTCAAGTTAAG-1  | 2091 | 11578 | 7  |
| Donor3-GTGCGGTGTCATATGC-1  | 3641 | 16570 | 6  |
| Donor3-GTGGGTCAGGGTTCCC-1  | 2255 | 9587  | 7  |
| Donor3-GTGGGTCTCTTTACGT-1  | 1581 | 4322  | 9  |
| Donor3-GTGTGCGAGGACAGAA-1  | 5259 | 16767 | 5  |
| Donor3-GTGTTAGAGGCCATAG-1  | 3155 | 10638 | 4  |
| Donor3-GTGTTAGGTGCAGGTA-1  | 9594 | 60381 | 1  |
| Donor3-GTTAAGCTCCAGAAGG-1  | 1327 | 5430  | 7  |
| Donor3-GTTACAGCACAGGCCT-1  | 1561 | 10635 | 8  |
| Donor3-GTTACAGCAGGACGTA-1  | 912  | 4868  | 8  |
| Donor3-GTTACAGCAGGGATTG-1  | 2725 | 11552 | 7  |
| Donor3-GTTCATTCAATCACAC-1  | 2239 | 6809  | 13 |
| Donor3-GTTCATTACAGGCCT-1   | 1919 | 6696  | 9  |
| Donor3-GTTCATTGTGAAGGCT-1  | 4641 | 13631 | 6  |
| Donor3-GTTCGGGCAATACGCT-1  | 3725 | 9405  | 3  |
| Donor3-GTTCGGGTCTGCTTGC-1  | 2230 | 9020  | 9  |
| Donor3-GTTCTCGAGAGCTGGT-1  | 3235 | 6356  | 5  |
| Donor3-GTTCTCGGTGGGTCAA-1  | 1429 | 4421  | 10 |
| Donor3-GTTCTCGTCCCTCAGT-1  | 6120 | 26002 | 5  |
| Donor3-GTTTCTACAAGCTGTT-1  | 5627 | 30926 | 5  |
| Donor3-GTTTCTAGTACTCGCG-1  | 2151 | 5167  | 6  |
| Donor3-TAAACCGAGCTCCCAG-1  | 2783 | 8591  | 10 |
| Donor3-TAAACCGAGTGGTAGC-1  | 3319 | 7642  | 3  |
| Donor3-TAAGAGATCCTGCCAT-1  | 6797 | 31933 | 5  |

Donor3-TAAGCGTCAGGTTTCA-1 3486 14849 10  
Donor3-TAAGCGTGTAGAAGGA-1 6224 28529 2  
Donor3-TAAGTGCCAAATACAG-1 1137 5643 8  
Donor3-TACACGAGTGTCAATC-1 1555 7276 8  
Donor3-TACAGTGAGCCGTCGT-1 4889 15472 5  
Donor3-TACCTATCATTGGGCC-1 1362 8198 8  
Donor3-TACCTATGTAAGGATT-1 2877 13860 7  
Donor3-TACCTATTCATAACCG-1 2337 7063 13  
Donor3-TACCTATTCGCGTAGC-1 7969 35743 3  
Donor3-TACCTTAGTTCAGACT-1 3377 8053 3  
Donor3-TACCTTATCTGGAGCC-1 1648 9300 8  
Donor3-TACGGATGTCCTCCAT-1 1295 6743 8  
Donor3-TACGGATGTTTGACTG-1 2948 14407 7  
Donor3-TACGGTAAGTATCGAA-1 3807 10174 3  
Donor3-TACGGTACAGATCCAT-1 841 4389 8  
Donor3-TACGGTAGTCTGCGGT-1 1905 9806 7  
Donor3-TACTCATCATGGATGG-1 1848 7164 9  
Donor3-TACTCGCCAAGAAGAG-1 1575 8041 7  
Donor3-TACTTACTCCCGACTT-1 2275 5976 13  
Donor3-TACTTG TAGAGCTGGT-1 2817 10824 9  
Donor3-TACTTG TAGTCCGGTC-1 3077 19325 7  
Donor3-TACTTG TAGTGTACTC-1 1034 4804 8  
Donor3-TACTTGTCAGCCTATA-1 2597 4426 6  
Donor3-TACTTGTCGGATCC-1 1274 6406 8  
Donor3-TAGACCAAGAGCTATA-1 4119 11866 4  
Donor3-TAGACCAAGGCCCGTT-1 4859 19381 6  
Donor3-TAGACCACACAGTCGC-1 1741 5321 13  
Donor3-TAGAGCTAGATGTAAC-1 7007 53632 4  
Donor3-TAGAGCTAGCGGCTTC-1 4879 14471 2  
Donor3-TAGCCGGTCAGCGATT-1 4416 16126 5  
Donor3-TAGGCATAGACAAGCC-1 1274 7869 8  
Donor3-TAGGCATAGAGCTATA-1 1962 11918 8  
Donor3-TAGGCATCATAGAAAC-1 1732 5443 10  
Donor3-TAGGCATGTCATATGC-1 2149 13430 8  
Donor3-TAGGCATGTTCCGTCT-1 1728 5361 13  
Donor3-TAGTGGTGTAAACGCGA-1 1601 4597 13  
Donor3-TAGTGGTGTGCCTGCA-1 1350 6634 8  
Donor3-TAGTTGGAGTAGCGGT-1 1606 4711 7  
Donor3-TAGTTGGTCTCGCTTG-1 3644 10111 6  
Donor3-TATCAGGAGGGTGTGT-1 5640 31758 6  
Donor3-TATCAGGCACCCTATC-1 3128 19969 7  
Donor3-TATCAGGGTGGGTATG-1 1779 7513 7  
Donor3-TATCAGGTCAGCGACC-1 3413 14274 6  
Donor3-TATCTCAAGTACCGGA-1 2261 6630 11  
Donor3-TATCTCACACATCCAA-1 3288 7530 3  
Donor3-TATCTCAGTACGCTGC-1 3422 8337 3  
Donor3-TATCTCAGTGTAAGTA-1 3911 14475 6  
Donor3-TATGCCCCACATTTCT-1 1675 6729 7  
Donor3-TATTACCCAGTAACGG-1 1525 5719 7  
Donor3-TCAACGAAGAAGCCCA-1 3217 17598 7  
Donor3-TCAACGAAGCTAGTTC-1 1425 6573 8  
Donor3-TCAACGATCCACGTTC-1 3602 12139 4  
Donor3-TCAATCTAGGTGATTA-1 4455 22632 4  
Donor3-TCAATCTAGTTAGCGG-1 4134 10603 2  
Donor3-TCAATCTGTACCGTAT-1 2710 6006 5  
Donor3-TCAATCTTCCTTAATC-1 3384 19942 7

Donor3-TCACAAGCACGAAGCA-1 1613 5884 7  
Donor3-TCACAAGGTAGCGTCC-1 1649 5656 9  
Donor3-TCACAAGTCAATCTCT-1 3651 8931 3  
Donor3-TCACGAACACCTCGTT-1 1668 7230 7  
Donor3-TCAGATGAGATATGGT-1 4952 27007 5  
Donor3-TCAGATGTCAAGCCTA-1 3733 16024 6  
Donor3-TCAGATGTCATAACCG-1 2054 6075 13  
Donor3-TCAGATGTCTACGAGT-1 3030 7011 5  
Donor3-TCAGCAAGTTTGACAC-1 1393 7801 8  
Donor3-TCAGCAATCTCTGCTG-1 1378 7760 8  
Donor3-TCAGCAATCTGCGGCA-1 4743 13579 2  
Donor3-TCAGGATAGGCGTACA-1 1650 4378 10  
Donor3-TCAGGATGTGAGCGAT-1 7950 50579 5  
Donor3-TCAGGATTCGCTAGCG-1 4630 13503 5  
Donor3-TCAGGATTCTAACGGT-1 3144 7163 3  
Donor3-TCAGGTAAGGGATACC-1 1896 12594 8  
Donor3-TCAGGTAAGGTGACCA-1 1086 5461 8  
Donor3-TCATTACAGTGTACCT-1 2333 8105 10  
Donor3-TCATTACGTACCGCTG-1 3820 9534 3  
Donor3-TCATTTGAGCGAGAAA-1 4253 15476 6  
Donor3-TCATTTGTCAGCTGGC-1 4669 22514 6  
Donor3-TCATTTGTCAGTTGAC-1 5893 21179 2  
Donor3-TCCACACGTCAGATAA-1 1758 6129 6  
Donor3-TCCACACTCACAAACC-1 3094 21631 7  
Donor3-TCCCGATCATACAGCT-1 1913 7074 9  
Donor3-TCCCGATTCATCTGTT-1 1763 5365 13  
Donor3-TCCCGATTCTTTCCTC-1 1051 4433 8  
Donor3-TCGAGGCAGTGA CTCT-1 4088 9907 5  
Donor3-TCGAGGCAGTTTAGGA-1 2918 6623 4  
Donor3-TCGAGGCCAGGATCGA-1 2031 4698 4  
Donor3-TCGAGGCGTTAAAGAC-1 3373 7866 6  
Donor3-TCGAGGCGTTTGACTG-1 2587 5241 3  
Donor3-TCGAGGCTCGCGTTTC-1 2178 7263 10  
Donor3-TCGAGGCTCTTAGCCC-1 3253 15972 7  
Donor3-TCGCGAGAGCTCTCGG-1 1139 5656 8  
Donor3-TCGCGAGGTTAAGTAG-1 2142 5252 11  
Donor3-TCGCGAGTCCACTCCA-1 1543 7883 8  
Donor3-TCGCGAGTCTGTCTAT-1 2391 7923 7  
Donor3-TCGCGTTCAAAGTCAA-1 5333 17852 2  
Donor3-TCGCGTTGTACTCGCG-1 4374 11827 5  
Donor3-TCGCGTTGTGCACTTA-1 1631 10442 8  
Donor3-TCGCGTTTCTAACCGA-1 1558 7491 7  
Donor3-TCGGGACAGGCTAGAC-1 2702 5543 6  
Donor3-TCGGGACTCATCGATG-1 1025 4411 8  
Donor3-TCGGGACTCATTTGGG-1 3174 12792 6  
Donor3-TCGGGACTCGCAGGCT-1 1131 4924 8  
Donor3-TCGGTAAAGGATGGAA-1 3764 18362 6  
Donor3-TCGTACCCAAGCCGTC-1 1732 4393 10  
Donor3-TCGTAGAGTCTCGTTC-1 7421 30056 1  
Donor3-TCGTAGATCTTCGAGA-1 3831 9577 5  
Donor3-TCTCATAACAATGCCAT-1 1843 9455 8  
Donor3-TCTCATAACAGACGTAG-1 3798 14659 6  
Donor3-TCTCATATCATGCTCC-1 1083 5254 8  
Donor3-TCTCATATCATTGCGA-1 2019 5536 10  
Donor3-TCTCTAAAGGGTGTTG-1 2082 9554 7  
Donor3-TCTCTAAAGTTATCGC-1 1643 7509 7

Donor3-TCTCTAAGTAGCTGCC-1 4652 14632 3  
Donor3-TCTCTAATCAGCTCGG-1 5651 21856 4  
Donor3-TCTCTAATCCAGATCA-1 1409 4567 13  
Donor3-TCTGAGAAGTGGTAAT-1 1397 5374 7  
Donor3-TCTGAGACAAACAACA-1 1078 5187 8  
Donor3-TCTGAGACACTCAGGC-1 4593 14620 2  
Donor3-TCTGAGACAGTTCATG-1 1218 7001 8  
Donor3-TCTGAGAGTCGTGGCT-1 2715 6357 3  
Donor3-TCTGGAACATCGATTG-1 3018 6427 3  
Donor3-TCTTCGGAGCGGATCA-1 1012 4570 8  
Donor3-TCTTCGGCATAGACTC-1 1943 10232 7  
Donor3-TCTTCGGTCCTCCTAG-1 1929 6440 13  
Donor3-TCTTTCCCAGGGTACA-1 2575 4999 6  
Donor3-TCTTTCCCATTCCCTGC-1 4274 19429 6  
Donor3-TGAAAGACAAAGGCGT-1 5381 18913 6  
Donor3-TGACAACAGAGGACGG-1 2159 5797 4  
Donor3-TGACAACCACGCCAGT-1 1973 10917 8  
Donor3-TGACAACGTATGGTTC-1 3899 11107 3  
Donor3-TGACAACGTGTAATGA-1 2229 6373 11  
Donor3-TGACGGCGTAAGTGTA-1 3776 8793 5  
Donor3-TGACTTTCAATGTAAG-1 3638 20378 7  
Donor3-TGACTTTGTTACAGAA-1 3519 8739 3  
Donor3-TGAGAGGGTGCGCTTG-1 1545 4699 13  
Donor3-TGAGCATAGTCTCAAC-1 6800 31536 5  
Donor3-TGAGCATAGTGTTAGA-1 1169 5441 8  
Donor3-TGAGCATGTGCCTGTG-1 2380 16541 8  
Donor3-TGAGCATGTTACCAGT-1 2517 7281 4  
Donor3-TGAGCCGCACGAGGTA-1 1537 5669 9  
Donor3-TGAGGGAGTCCTCTTG-1 1440 5216 9  
Donor3-TGATTTCCAATTCCTT-1 2529 8412 10  
Donor3-TGCACCTTCATGTCCC-1 2738 9764 13  
Donor3-TGCCAAAAGCGATGAC-1 1528 9332 8  
Donor3-TGCCAAAAGTCGATAA-1 1765 4684 10  
Donor3-TGCCCATAGCAGACTG-1 2018 8605 9  
Donor3-TGCCCATCAGGGAGAG-1 2973 6431 3  
Donor3-TGCCCATTCGTGACAT-1 4310 11227 3  
Donor3-TGCCCTAGTACTTCTT-1 3279 16574 7  
Donor3-TGCCCTAGTGGTTTCA-1 2490 9300 10  
Donor3-TGCCCTATCTACTATC-1 1989 4573 4  
Donor3-TGCGCAGAGGCCCGTT-1 1454 6881 8  
Donor3-TGCGCAGGTAGGCATG-1 2124 5931 11  
Donor3-TGCGCAGGTTCGAGATG-1 5071 14717 2  
Donor3-TGCGCAGGTTGGACCC-1 4094 9989 2  
Donor3-TGCGGGTAGGACATTA-1 1887 7375 7  
Donor3-TGCGGGTCATCGACGC-1 1294 6685 8  
Donor3-TGCGGGTGTGCAACTT-1 2029 11284 8  
Donor3-TGCGGGTTCTGATACG-1 2059 5723 10  
Donor3-TGCGTGGCACACCGCA-1 3879 10590 6  
Donor3-TGCGTGGTCACCAGGC-1 2520 10153 6  
Donor3-TGCGTGGTCCCTCTTT-1 1459 5744 7  
Donor3-TGCGTGGTCTCACATT-1 1912 7023 13  
Donor3-TGCGTGGTCTTTAGTC-1 4720 13368 5  
Donor3-TGCTACCAGCTGTCTA-1 4387 22002 6  
Donor3-TGCTACCAGTCACGCC-1 4574 15165 2  
Donor3-TGCTACCCATCCCACT-1 3965 17807 5  
Donor3-TGCTACCTCCAAAGTC-1 5619 19392 5

Donor3-TGGACGCCATGTTGAC-1 1448 6214 7  
Donor3-TGGACGCGTACACCGC-1 1954 4918 13  
Donor3-TGGACGCGTGTCTTT-1 5275 16740 1  
Donor3-TGGACGCTCAAAGTAG-1 1744 5661 13  
Donor3-TGGCCAGCAACTGGCC-1 2153 9712 7  
Donor3-TGGCGCACAAACTGCT-1 3957 21059 6  
Donor3-TGGCGCATCCAAACAC-1 5439 21503 6  
Donor3-TGGCTGGAGGTTACCT-1 5864 37474 6  
Donor3-TGGCTGGCATGAAGTA-1 1758 11127 8  
Donor3-TGGGAAGCAAGGGTCA-1 2814 5863 3  
Donor3-TGGGAAGTCGCGCCAA-1 2575 11374 7  
Donor3-TGGGCGTAGCTAAGAT-1 4630 22593 6  
Donor3-TGGGCGTGTAGCGCAA-1 3080 10164 11  
Donor3-TGGGCGTTCAGTTAGC-1 1994 11587 7  
Donor3-TGGTTAGAGAATTGTG-1 1712 5144 13  
Donor3-TGGTTAGAGAGCCCAA-1 4165 11376 6  
Donor3-TGGTTAGTCACATGCA-1 2720 9599 6  
Donor3-TGGTTAGTCCCAAGTA-1 1395 5556 7  
Donor3-TGGTTCCCAAGGACTG-1 2787 5852 5  
Donor3-TGGTTCCCATATGGTC-1 1149 6686 8  
Donor3-TGGTTCCGTCCCTACT-1 4875 14325 6  
Donor3-TGTATTCAGGACCACA-1 2045 6121 13  
Donor3-TGTATTCACCTCGTT-1 4308 12403 4  
Donor3-TGTATTCGTGTTGAGG-1 2280 6584 6  
Donor3-TGTATTCCTCGCAAAC-1 2919 5713 6  
Donor3-TGTCCCAGTCTGGAGA-1 3399 7636 3  
Donor3-TGTCCCAGTGTGGTTT-1 2451 11465 7  
Donor3-TGTGGTACAAGCTGGA-1 4368 12484 1  
Donor3-TGTGGTACATCATCCC-1 3240 19389 7  
Donor3-TGTGGTATCAGGCCCA-1 2507 14058 7  
Donor3-TGTGTTTAGCTCAACT-1 1286 6553 8  
Donor3-TGTGTTTGTAAAGTGGC-1 1619 5231 7  
Donor3-TGTTCCGAGATCCCAT-1 4585 24582 6  
Donor3-TGTTCCGGTATTACCG-1 988 4382 8  
Donor3-TGTTCCGGTCTACCTC-1 4787 18099 5  
Donor3-TGTTCCGGTTAGATGA-1 3027 10691 11  
Donor3-TTAACTCAGCTAGTTC-1 6247 20803 1  
Donor3-TTAACTCTCAAGAAGT-1 4619 13006 4  
Donor3-TTAACTCTCCCGGATG-1 3493 8421 3  
Donor3-TTAACTCTCTCGATGA-1 3098 7471 4  
Donor3-TTAGGACCACTTCGAA-1 5951 22492 5  
Donor3-TTAGGACGTAAATACG-1 1651 9802 8  
Donor3-TTAGGACGTACCGTAT-1 1479 5419 13  
Donor3-TTAGGCACACGACGAA-1 3849 24747 7  
Donor3-TTAGTTCAGCTTATCG-1 5224 16464 3  
Donor3-TTATGCTCAAATCCGT-1 5159 16121 4  
Donor3-TTCCCAGAGCGCCTTG-1 1800 8931 7  
Donor3-TTCCCAGTCAATCACG-1 6000 31123 5  
Donor3-TTCCCAGTCGCTAGCG-1 1844 6267 13  
Donor3-TTCGGTCAGCCCAGCT-1 4759 15172 5  
Donor3-TTCGGTCCAGCTGTAT-1 1722 4980 6  
Donor3-TTCTACAGTGGAAAGA-1 3952 9381 5  
Donor3-TTCTACATCTGTACGA-1 1584 10028 8  
Donor3-TTCTCAAAGATGCCTT-1 1397 5643 8  
Donor3-TTCTCAAAGGCGACAT-1 3261 7938 3  
Donor3-TTCTCAAGTATCGCAT-1 7267 38578 5

Donor3-TTCTCAATCACTCCTG-1 3234 7108 3  
Donor3-TTCTCCTCACTTAACG-1 5410 28233 6  
Donor3-TTCTCCTGTATATGGA-1 4124 11248 3  
Donor3-TTCTCCTTCAGGCAAG-1 2651 9582 6  
Donor3-TTGAACGAGGCCCTCA-1 2575 8095 4  
Donor3-TTGAACGGTTCCCGAG-1 3427 14439 10  
Donor3-TTGAACGTCCGAGCCA-1 3210 16678 7  
Donor3-TTGAACGTCTCACATT-1 1793 8113 7  
Donor3-TTGACTTAGTCATGCT-1 1585 5497 9  
Donor3-TTGACTTGTCGCGGTT-1 5299 24190 6  
Donor3-TTGACTTGTTAGTGGG-1 1653 6073 9  
Donor3-TTGACTTTCGCCTGAG-1 2537 8802 6  
Donor3-TTGCCGTCACTCGACG-1 3686 8594 3  
Donor3-TTGCCGTCAATGAACCT-1 5019 15594 5  
Donor3-TTGCCGTTCGCGGATC-1 1646 10265 8  
Donor3-TTGCCGTGTAAGGGAA-1 1034 4396 8  
Donor3-TTGGAACAGGTGTTAA-1 3631 13670 10  
Donor3-TTGGAACCAGTTTACG-1 1642 9684 8  
Donor3-TTGGAACTCAGCTCGG-1 1627 4387 10  
Donor3-TTGGAACTCTATCCCG-1 1693 4352 13  
Donor3-TTGGAACAAGACCTAGG-1 982 4639 8  
Donor3-TTGGAACAATGAAAC-1 2684 13039 7  
Donor3-TTTACTGGTGTGCCTG-1 1639 8369 8  
Donor3-TTTACTGGTTGGGACA-1 1365 4346 7  
Donor3-TTTACTGTCCTTTACA-1 4307 16802 4  
Donor3-TTTACTGTGCGCTGTT-1 3312 14950 6  
Donor3-TTTATGCAGGTAGCTG-1 2192 7279 10  
Donor3-TTTATGCTCACAGGCC-1 1719 7683 7  
Donor3-TTTCCTCCAGCCAATT-1 7058 30467 1  
Donor3-TTTGCGCTCCCTCTTT-1 3135 6867 3  
Donor3-TTTGGTTCAGCTGTAT-1 2888 19524 7  
Donor3-TTTGTCACAAGTCATC-1 3533 7488 5  
Donor3-AAACCTGAGGGTCGAT-2 1631 10126 8  
Donor3-AAACCTGAGTAGCCGA-2 2249 12896 7  
Donor3-AAACCTGGTGATGTGG-2 4409 11842 1  
Donor3-AAACCTGTCTTCAACT-2 2231 5174 5  
Donor3-AAACGGGAGAGACGAA-2 2553 4947 6  
Donor3-AAACGGGCAGGTGCCT-2 2591 11293 6  
Donor3-AAACGGGCATCTGGTA-2 2339 18118 8  
Donor3-AAACGGGGTAATTGGA-2 1277 5533 8  
Donor3-AAACGGGTCGATAGAA-2 4849 32669 6  
Donor3-AAACGGGTCGCGGATC-2 4077 10879 3  
Donor3-AAAGATGAGCTAACAA-2 2562 5467 3  
Donor3-AAAGATGCATTCGACA-2 4483 17633 6  
Donor3-AAAGATGGTAGAGCTG-2 4089 12362 2  
Donor3-AAAGCAACACAGATTC-2 1792 7869 7  
Donor3-AAAGCAAGTACTTAGC-2 3658 13284 6  
Donor3-AAAGTAGCAATGACCT-2 3568 15856 10  
Donor3-AAAGTAGTACTTCTT-2 3689 8808 3  
Donor3-AAATGCCCATTAGCCA-2 1097 4848 8  
Donor3-AACACGTTTCGTATCAG-2 1051 6182 8  
Donor3-AACCATGCAGTGACAG-2 2297 11475 7  
Donor3-AACCATGGTGCGATAG-2 1275 7490 8  
Donor3-AACCGGTCATGCAAC-2 5751 23620 6  
Donor3-AACGTTGGTCTGATTG-2 3169 7620 3  
Donor3-AACGTTGTCCGGCACA-2 5176 25141 6



Donor3-AACTCAGGTGACGCCT-2 1242 4582 7  
Donor3-AACTCCCAGAAGAAGC-2 2287 4144 6  
Donor3-AACTCCCAGGTACTION-2 1729 9321 8  
Donor3-AACTCCCAGTCCCACG-2 2210 15852 8  
Donor3-AACTCCCCATTTCACT-2 1619 4518 13  
Donor3-AACTCCCGTCTCCATC-2 1998 12582 8  
Donor3-AACTCCCGTCTGGTCG-2 1153 5653 8  
Donor3-AACTCCCTCCCTCAGT-2 4659 12988 2  
Donor3-AACTCCCTCCGCGGTA-2 1785 12069 8  
Donor3-AACTCTTCAGGAATGC-2 5341 17071 4  
Donor3-AACTGGTAGCAGGTCA-2 4126 11346 6  
Donor3-AACTTTCAGGTGCACA-2 1759 6103 9  
Donor3-AACTTTCAGTTGTCGT-2 1465 6201 7  
Donor3-AACTTTCCAACACCCG-2 1831 5866 13  
Donor3-AACTTTCTCATATCGG-2 2094 5345 4  
Donor3-AAGACCTCATTACGAC-2 5016 16217 6  
Donor3-AAGACCTTCCCTCTTT-2 2403 9586 6  
Donor3-AAGCCGCTCCTCTAGC-2 3615 19563 7  
Donor3-AAGGAGCAGTGCGTGA-2 1205 5119 8  
Donor3-AAGGAGCAGTTTTCGT-2 3580 25401 7  
Donor3-AAGGAGCTCAAACCGT-2 5445 15533 1  
Donor3-AAGGAGCTCACGCATA-2 3613 9274 3  
Donor3-AAGGCAGAGCAGGTCA-2 2302 4822 3  
Donor3-AAGGCAGCAGCAGTTT-2 894 4290 8  
Donor3-AAGTCTGCATGCATGT-2 3630 9189 3  
Donor3-AAGTCTGTCGTGACAT-2 1924 10589 7  
Donor3-AATCCAGCATGCCTTC-2 1905 4445 5  
Donor3-AATCCAGTCCATTCTA-2 2715 18012 8  
Donor3-AATCCAGTCTTCGGTC-2 4078 10627 3  
Donor3-AATCGGTAGAGGGCTT-2 1054 5013 8  
Donor3-AATCGGTTCTCGTTTA-2 3515 8685 4  
Donor3-ACACCAAAGAGTCGGT-2 1771 6595 9  
Donor3-ACACCAAAGTCTTGCA-2 5488 35270 10  
Donor3-ACACCAAACAACTGCT-2 3265 7397 4  
Donor3-ACACCAAAGTCAAACCTC-2 1380 4723 7  
Donor3-ACACCCTAGAAGATTC-2 2132 5426 6  
Donor3-ACACCCTAGATGGGTC-2 1850 4947 8  
Donor3-ACACCCTAGGTAGCCA-2 4740 14700 4  
Donor3-ACACCCTGTAGAGTGC-2 5277 20066 4  
Donor3-ACACCGGCAAGTTGTC-2 1571 5097 13  
Donor3-ACACCGGTCGGAGGTA-2 5073 17069 1  
Donor3-ACACTGAGTTGGGACA-2 2068 6430 10  
Donor3-ACAGCCGAGGCACATG-2 1154 4242 7  
Donor3-ACAGCTACATCCCATC-2 2091 8118 9  
Donor3-ACAGCTAGTTAAAGAC-2 2832 13800 7  
Donor3-ACATACGCATATGAGA-2 1502 8613 8  
Donor3-ACATCAGAGATCCCGC-2 1313 6564 8  
Donor3-ACATCAGCAGGGTATG-2 3447 8339 1  
Donor3-ACATGGTAGTTGAGAT-2 4238 11835 2  
Donor3-ACATGGTCAGCGTAAG-2 1601 5531 13  
Donor3-ACATGGTTCTTTCCTC-2 2118 11336 7  
Donor3-ACCAGTAAGATAGGAG-2 1889 5982 13  
Donor3-ACCAGTACAAGGACAC-2 4140 10814 5  
Donor3-ACCAGTAGTCCAGTAT-2 1227 6051 7  
Donor3-ACCAGTATCCGCGGTA-2 3381 8473 6  
Donor3-ACCAGTATCTGTCCGT-2 4280 13850 6

|                            |      |       |    |
|----------------------------|------|-------|----|
| Donor3-ACCCACTAGGTGCTTT-2  | 4446 | 13376 | 2  |
| Donor3-ACCCACTCAAACCTAC-2  | 4709 | 15736 | 2  |
| Donor3-ACCCACTCAGTTCCT-2   | 2257 | 4340  | 5  |
| Donor3-ACCCACTGTCCAGTAT-2  | 6952 | 30636 | 3  |
| Donor3-ACCCACTGTCTCACCT-2  | 3627 | 14621 | 6  |
| Donor3-ACCCACTGTTCCATGA-2  | 1007 | 4302  | 8  |
| Donor3-ACCCACTTCTCCTATA-2  | 3165 | 16638 | 7  |
| Donor3-ACCGTAAAGGTGCTTT-2  | 1522 | 6424  | 8  |
| Donor3-ACCGTAAACATCTATGG-2 | 5778 | 23254 | 5  |
| Donor3-ACCGTAAAGTTGTCTTT-2 | 2302 | 8956  | 7  |
| Donor3-ACCTTTACACTTAACG-2  | 4953 | 28139 | 5  |
| Donor3-ACCTTTACAGATGGCA-2  | 3357 | 6921  | 3  |
| Donor3-ACCTTTACATGAAGTA-2  | 1620 | 9030  | 8  |
| Donor3-ACCTTTAGTGTTGAGG-2  | 3307 | 8728  | 6  |
| Donor3-ACCTTTATCCTAGTGA-2  | 2295 | 4920  | 2  |
| Donor3-ACCTTTATCGGCGCAT-2  | 2213 | 5621  | 10 |
| Donor3-ACGAGCCCAATCACAC-2  | 2141 | 9483  | 7  |
| Donor3-ACGAGCCGTATAGTAG-2  | 2976 | 7014  | 3  |
| Donor3-ACGAGCCGTTTAGGAA-2  | 2387 | 10414 | 7  |
| Donor3-ACGAGCCTCACGACTA-2  | 3708 | 8987  | 3  |
| Donor3-ACGAGCCTCTTGCAAG-2  | 1495 | 6372  | 7  |
| Donor3-ACGAGGACAGGGCATA-2  | 1919 | 9599  | 7  |
| Donor3-ACGAGGATCACAAACC-2  | 4523 | 13437 | 2  |
| Donor3-ACGATACAGATGCCAG-2  | 1399 | 6925  | 8  |
| Donor3-ACGATGTAGGCTACGA-2  | 3968 | 11254 | 4  |
| Donor3-ACGATGTTCCCAACGG-2  | 2178 | 18868 | 8  |
| Donor3-ACGATGTTCTTCCTTC-2  | 1555 | 4602  | 8  |
| Donor3-ACGCAGCCATGATCCA-2  | 1410 | 9243  | 8  |
| Donor3-ACGCAGCGTTTGTTGG-2  | 1734 | 8521  | 7  |
| Donor3-ACGCCAGTCTCGGACG-2  | 1368 | 7827  | 8  |
| Donor3-ACGCCGAAGGTGATAT-2  | 2100 | 12544 | 8  |
| Donor3-ACGCCGAAGTGTCCCG-2  | 1312 | 6072  | 8  |
| Donor3-ACGCCGAGTAGAGGAA-2  | 3330 | 8422  | 5  |
| Donor3-ACGCCGATCAGGATCT-2  | 2815 | 6170  | 3  |
| Donor3-ACGCCGATCGCAAGCC-2  | 1827 | 4504  | 13 |
| Donor3-ACGGAGAAGAATTGTG-2  | 3588 | 24219 | 7  |
| Donor3-ACGGAGACATTTTCAGG-2 | 1090 | 4900  | 8  |
| Donor3-ACGGGCTAGATCGATA-2  | 2757 | 6155  | 3  |
| Donor3-ACGGGCTCAATTGCTG-2  | 2020 | 15856 | 8  |
| Donor3-ACGGGCTTCACCCTCA-2  | 1772 | 4353  | 10 |
| Donor3-ACGGGTCAGGAGCGTT-2  | 1240 | 4601  | 7  |
| Donor3-ACGGGTCAGTGCTGCC-2  | 2285 | 20772 | 8  |
| Donor3-ACGGGTCGTAAGTGGC-2  | 1095 | 5258  | 8  |
| Donor3-ACGGGTCGTTTACTCT-2  | 1043 | 5265  | 8  |
| Donor3-ACGTCAAAGGTTCCCTA-2 | 2596 | 6020  | 4  |
| Donor3-ACGTCAAGTCGTGGCT-2  | 2831 | 13826 | 6  |
| Donor3-ACTATCTGTGCGGAAA-2  | 3557 | 10542 | 2  |
| Donor3-ACTGAACCACCTGGTG-2  | 3446 | 20020 | 7  |
| Donor3-ACTGAGTCAAACCTGTC-2 | 3304 | 19064 | 7  |
| Donor3-ACTGAGTGTTTGTGTG-2  | 5878 | 20224 | 3  |
| Donor3-ACTGATGCAGCGAACA-2  | 2808 | 13804 | 7  |
| Donor3-ACTGATGTCGTACCGG-2  | 1763 | 5738  | 10 |
| Donor3-ACTGCTCAGACAGAGA-2  | 1130 | 5539  | 8  |
| Donor3-ACTGCTCCACACATGT-2  | 2226 | 14870 | 8  |
| Donor3-ACTGTCCGTCGGATCC-2  | 1730 | 6190  | 7  |
| Donor3-ACTGTCTCTCGGACG-2   | 2791 | 5776  | 3  |

Donor3-ACTTACTCACGGTGTC-2 1411 6173 7  
Donor3-ACTTACTGTTCAACCA-2 1999 5977 13  
Donor3-ACTTGTTGTACAGTGG-2 1840 5512 6  
Donor3-ACTTGTTTCACGGTTA-2 2074 8987 7  
Donor3-ACTTGTTTCTCAACTT-2 4820 14750 6  
Donor3-ACTTTCAAGGAGCGAG-2 1457 4546 13  
Donor3-ACTTTACACGAAGCA-2 3029 9748 4  
Donor3-ACTTTACAGCCAGAA-2 3729 22204 7  
Donor3-ACTTTATCAAAGACA-2 1012 5024 8  
Donor3-AGAATAGAGATGTGGC-2 9031 64363 5  
Donor3-AGAATAGCAGACAAAT-2 1615 5856 7  
Donor3-AGACGTTCAGATAATG-2 3817 9929 3  
Donor3-AGACGTTGTCCGAGTC-2 3107 24207 7  
Donor3-AGACGTTTCAGTTGAC-2 1067 4621 8  
Donor3-AGAGCTTCATCCGGGT-2 2144 5363 4  
Donor3-AGAGCTTCATCTATGG-2 3359 7416 3  
Donor3-AGAGCTTGTTACGACT-2 4243 12953 3  
Donor3-AGAGTGGGTGGTACAG-2 1321 5185 9  
Donor3-AGATCTGAGAGAACAG-2 2399 7389 6  
Donor3-AGATCTGGTGCGAAAC-2 2483 11184 6  
Donor3-AGATTGCGTCGAGATG-2 1668 9563 8  
Donor3-AGATTGCGTCTTCGTC-2 3699 9844 1  
Donor3-AGATTGCGTTTGCATG-2 2220 15610 8  
Donor3-AGCAGCCCAGAGCCAA-2 1929 7133 9  
Donor3-AGCAGCCGTCCGTCAG-2 2152 13560 7  
Donor3-AGCAGCCTCCACTGGG-2 1547 8322 8  
Donor3-AGCATAACAGATAGGAG-2 7003 40938 2  
Donor3-AGCATAACAGATGTGGC-2 959 4151 8  
Donor3-AGCCTAAAGGACACCA-2 2586 12589 7  
Donor3-AGCCTAAGTAGCGATG-2 1806 7572 7  
Donor3-AGCGGTTCGTACCAGTT-2 2317 14474 7  
Donor3-AGCGGTCTCATGCAAC-2 1246 4260 7  
Donor3-AGCGTATCACAAACGCC-2 1422 7839 8  
Donor3-AGCTCCTAGATATGCA-2 1376 6593 8  
Donor3-AGCTCCTGTGAGGCTA-2 2438 11537 7  
Donor3-AGCTCTCGTAGAAAGG-2 3550 9014 3  
Donor3-AGCTCTCTCGCATGAT-2 1570 9805 8  
Donor3-AGCTTGAAGAAGGCCT-2 2497 11020 7  
Donor3-AGCTTGAGTCGTGGCT-2 905 4327 8  
Donor3-AGCTTGATCACAAACC-2 1401 6291 7  
Donor3-AGCTTGATCTCGGACG-2 1235 6769 8  
Donor3-AGGCCACAGATGAGAG-2 4508 20620 6  
Donor3-AGGCCACCAGCTGTTA-2 2833 9679 10  
Donor3-AGGCCACGTCGAGTTT-2 1268 4769 7  
Donor3-AGGCCGTAGAGAACAG-2 1561 8558 7  
Donor3-AGGCCGTAGTGGAGAA-2 3215 7094 3  
Donor3-AGGCCGTTCCATGAAC-2 3643 9379 1  
Donor3-AGGCCGTTTCGAGAACG-2 2947 15092 7  
Donor3-AGGGAGTCACGCTTTC-2 6480 38061 6  
Donor3-AGGGAGTGTCTTGATG-2 1565 4171 6  
Donor3-AGGGATGTCGTCGTTT-2 2694 12247 7  
Donor3-AGGGTGACACCGATAT-2 6944 53598 5  
Donor3-AGGGTGAGTCTGGTCG-2 4020 18990 6  
Donor3-AGGTCAATTCTCTTGAT-2 3855 10312 3  
Donor3-AGGTCCGTCTGTGCAA-2 1819 5050 6  
Donor3-AGGTCCGTCTTGATC-2 1464 6985 7

Donor3-AGTCTTTGTCGTCTTC-2 7413 43000 5  
Donor3-AGTGAGGCAGCATACT-2 1322 5816 7  
Donor3-AGTGAGGGTCACTCCTG-2 4253 14470 3  
Donor3-AGTGAGGGTCGTAGGTT-2 1818 8831 7  
Donor3-AGTGGGACAATGGAAT-2 5118 16787 2  
Donor3-AGTGGGACACGGTGTC-2 1324 6953 8  
Donor3-AGTGGGAGTGGCAAAC-2 4196 22646 7  
Donor3-AGTGGGATCCGCATAA-2 1421 8111 8  
Donor3-AGTTGGTCATGCCTTC-2 3047 7384 3  
Donor3-AGTTGGTGTCTGATTG-2 1982 4422 5  
Donor3-ATAACGCTCCTTTACA-2 1951 4961 4  
Donor3-ATAAGAGCAGATGGCA-2 4262 11237 5  
Donor3-ATAGACCAGAAGGCCT-2 1639 9560 8  
Donor3-ATAGACCAGATATGGT-2 2344 12796 7  
Donor3-ATAGACCTCAGCAACT-2 1479 7653 8  
Donor3-ATCACGAAGCAGCGTA-2 4718 13021 3  
Donor3-ATCACGAAGTCGTA CT-2 5952 30825 6  
Donor3-ATCACGACAATCGGTT-2 4412 12214 6  
Donor3-ATCATCTGTGTAATGA-2 1938 8321 7  
Donor3-ATCATCTTCAACACCA-2 2540 9125 13  
Donor3-ATCATGGAGAGCTTCT-2 8184 46821 5  
Donor3-ATCATGGGTAAGGATT-2 5366 28275 5  
Donor3-ATCATGGGTCTAAACC-2 5740 32041 6  
Donor3-ATCATGGGTTTAGCTG-2 2884 16805 7  
Donor3-ATCATGGTCGTTACAG-2 4540 13584 3  
Donor3-ATCCACCGTAGGGACT-2 2329 10267 7  
Donor3-ATCCACCTCAACACCA-2 3396 8328 6  
Donor3-ATCCACCTCGCCTGTT-2 5071 16752 5  
Donor3-ATCCGAAGTGCAACTT-2 3303 19532 7  
Donor3-ATCGAGTAGCCACTAT-2 1849 12176 8  
Donor3-ATCGAGTCAACTGCTA-2 2171 6355 13  
Donor3-ATCGAGTTCGAGAACG-2 1203 4223 7  
Donor3-ATCTACTCAATCTGCA-2 1761 8685 7  
Donor3-ATCTACTCAGCTGCTG-2 2036 9048 7  
Donor3-ATCTACTTCTCCAACC-2 4257 10171 2  
Donor3-ATCTGCCAGTCACGCC-2 1587 8152 8  
Donor3-ATCTGCCAGTGGAGAA-2 2220 12180 7  
Donor3-ATCTGCCGTTGGTAAA-2 2223 9980 7  
Donor3-ATGCGATAGACTCGGA-2 1911 4228 4  
Donor3-ATGCGATAGCTCTCGG-2 1628 7605 8  
Donor3-ATGCGATCAACAACCT-2 1947 4547 5  
Donor3-ATGCGATCAACTGGCC-2 8211 57130 6  
Donor3-ATGCGATCAGTATGCT-2 1762 4602 10  
Donor3-ATGCGATGTCACCCAG-2 1705 4182 13  
Donor3-ATGGGAGAGCAGGCTA-2 5862 24066 2  
Donor3-ATGGGAGCAGCTCCGA-2 1159 5024 8  
Donor3-ATGTGTGAGAGCTGGT-2 3652 8309 1  
Donor3-ATGTGTGCATTGGCGC-2 3019 11636 10  
Donor3-ATGTGTGTCCCTAACC-2 1895 5746 13  
Donor3-ATTACTCAGCCCAGCT-2 4732 16137 4  
Donor3-ATTACTCCACCAGGCT-2 3266 7988 5  
Donor3-ATTATCCAGCGATGAC-2 3298 17151 7  
Donor3-ATTCTACAGCCCAACC-2 5804 18405 2  
Donor3-ATTCTACCAGGGTTAG-2 4140 17819 6  
Donor3-ATTGGACCAACGCACC-2 3820 9924 1  
Donor3-ATTGGACCAGGGAGAG-2 1613 4536 13

Donor3-ATTGGTGGTGTTCGAT-2 8820 76967 5  
Donor3-ATTGGTGGTTATGCGT-2 2264 7916 8  
Donor3-ATTTCTGAGCATGGCA-2 3110 18429 7  
Donor3-ATTTCTGCACACTGCG-2 1363 8076 8  
Donor3-ATTTCTGCAGCCAATT-2 1212 6250 8  
Donor3-ATTTCTGGTACGACCC-2 2678 5541 3  
Donor3-ATTTCTGTCCTGCAGG-2 4496 14054 1  
Donor3-CAACCAAAGGCCCTTG-2 1191 5519 8  
Donor3-CAACCAATCAGAGACG-2 3714 8590 4  
Donor3-CAACCAATCGGACAAG-2 1994 6334 13  
Donor3-CAACCTCCAGCAGTTT-2 2687 10047 6  
Donor3-CAACCTCTCAGGTAAA-2 4748 14222 6  
Donor3-CAACCTCTCTGTCAAG-2 1272 5263 7  
Donor3-CAAGAAAGTGAGGCTA-2 1196 5541 8  
Donor3-CAAGAAATCAGTTGAC-2 1404 4169 13  
Donor3-CAAGATCCATTGGGCC-2 2535 5581 6  
Donor3-CAAGATCGTGTTTGGT-2 3647 25179 7  
Donor3-CAAGATCTCAACACGT-2 1166 5192 8  
Donor3-CAAGGCCAGTGGTAGC-2 3100 12959 7  
Donor3-CAAGGCCCAAGGTGTG-2 2089 6699 13  
Donor3-CAAGGCCCATCGATTG-2 2194 9468 7  
Donor3-CAAGGCCCTCCCTCAGT-2 4783 14649 3  
Donor3-CAAGGCCCTCTAGAGTC-2 1443 5454 7  
Donor3-CAAGTTGCACACGCTG-2 4778 14667 5  
Donor3-CAAGTTGCAGCGTAAG-2 5390 18933 1  
Donor3-CACAAACAGGGCTTGA-2 2883 13061 6  
Donor3-CACACAACAACACGCC-2 2437 8056 6  
Donor3-CACACCTCAAAGTGCG-2 2299 4455 3  
Donor3-CACACCTGTTTCGCTC-2 1376 7433 8  
Donor3-CACACCTTCTTGAGAC-2 2142 7173 9  
Donor3-CACACTCAGAGTAAGG-2 3452 7642 3  
Donor3-CACACTCAGGTGATAT-2 1983 9991 7  
Donor3-CACACTCCAACCTTGAC-2 8442 58168 6  
Donor3-CACACTCGTATTACCG-2 2097 6059 13  
Donor3-CACACTCTCGAATGGG-2 6022 25474 1  
Donor3-CACAGGCAGGGTGTGT-2 1663 9315 8  
Donor3-CACAGGCCATTTGCC-2 1778 8430 8  
Donor3-CACAGGCTCTTTACAC-2 2616 5545 6  
Donor3-CACAGTAGTTCCACAA-2 1204 4690 7  
Donor3-CACAGTAGTTCCCTTG-2 3755 22639 7  
Donor3-CACATAGAGTGACTCT-2 2698 8204 13  
Donor3-CACATAGGTGCCTGTG-2 1498 6749 7  
Donor3-CACATTTAGAAGGGTA-2 1000 4161 8  
Donor3-CACATTTCACTTAAGC-2 2010 4694 4  
Donor3-CACATTTTCTAACTCT-2 1972 6358 12  
Donor3-CACATTTTCTAAGCCA-2 2327 5787 4  
Donor3-CACCACTCACTAGTAC-2 1931 6752 9  
Donor3-CACCACTCATCTACGA-2 1037 5622 8  
Donor3-CACCACTCATTATCTC-2 6904 30175 1  
Donor3-CACCACTGTATGAATG-2 3317 7402 3  
Donor3-CACCTTGTCGGACAAG-2 3203 7177 3  
Donor3-CACTCCACAAGTCTAC-2 1271 4431 13  
Donor3-CACTCCACATAAAGGT-2 3815 8862 5  
Donor3-CACTCCAGTATATGGA-2 1717 5587 9  
Donor3-CACTCCAGTCATACTG-2 2111 8429 8  
Donor3-CACTCCATCCTGTACC-2 1366 6754 8

Donor3-CAGAATCCAAGTCTGT-2 1331 4436 9  
Donor3-CAGAATCGTTTGTGTG-2 3798 17682 6  
Donor3-CAGAATCTCTTCAACT-2 3682 9166 4  
Donor3-CAGAGAGCACGGTAAG-2 2963 6674 3  
Donor3-CAGAGAGGTGAGCGAT-2 4340 15044 5  
Donor3-CAGAGAGTCAGCATGT-2 2609 6959 4  
Donor3-CAGAGAGTCGGACAAG-2 1831 7741 7  
Donor3-CAGATCAGTAATCGTC-2 2332 4912 3  
Donor3-CAGATCATCAGCATGT-2 1999 6085 13  
Donor3-CAGCAGCGTCTTTCAT-2 2285 4897 2  
Donor3-CAGCATAGTAGATTAG-2 1384 7287 8  
Donor3-CAGCATAGTCTTGATG-2 2513 5275 3  
Donor3-CAGCCGAAGACTACAA-2 2219 12069 7  
Donor3-CAGCCGAAGTCTTGCA-2 990 4144 8  
Donor3-CAGCCGAAGTGTACCT-2 4319 19636 6  
Donor3-CAGCCGAGTCGAGATG-2 1210 7245 8  
Donor3-CAGCCGAGTGGCCCTA-2 1866 6294 6  
Donor3-CAGCGACCACTACAGT-2 1654 4756 13  
Donor3-CAGCTAAAGATCCCAT-2 1490 8575 8  
Donor3-CAGCTAACAAGGACTG-2 7170 62461 5  
Donor3-CAGCTGGCAATCACAC-2 3221 6995 3  
Donor3-CAGCTGGCACATTAGC-2 1846 5030 13  
Donor3-CAGCTGGTCACGACTA-2 3461 8677 3  
Donor3-CAGCTGGTCAGTTAGC-2 5378 17269 2  
Donor3-CAGTAACAGAGTAATC-2 3567 26313 7  
Donor3-CAGTAACCAGCCTTGG-2 1778 5612 9  
Donor3-CAGTAACTCGCAAAC-2 1890 12244 8  
Donor3-CAGTAACTCTTGAGAC-2 4250 11475 6  
Donor3-CAGTCCTAGACAGAGA-2 3554 8232 3  
Donor3-CAGTCCTACCAACCG-2 3243 8097 4  
Donor3-CAGTCCTGTCCTCCAT-2 1791 4470 13  
Donor3-CATATGGCAACTGCTA-2 1062 4503 8  
Donor3-CATATTCGTCTCGTTC-2 2926 11514 6  
Donor3-CATATTCGTGACTACT-2 5113 16464 5  
Donor3-CATATTCCTAGAGTC-2 1376 5620 8  
Donor3-CATCAAGAGGCATGTG-2 6727 29113 5  
Donor3-CATCAAGCAACACCCG-2 1937 8762 7  
Donor3-CATCAAGGTCAACATC-2 2022 4350 5  
Donor3-CATCAGACAGGGTTAG-2 3101 19132 7  
Donor3-CATCAGAGTAACGCGA-2 1219 4950 7  
Donor3-CATCAGAGTTAAGATG-2 1637 7012 7  
Donor3-CATCCACCAGCGTTCG-2 1063 4655 8  
Donor3-CATCCACCAGGACCCT-2 3792 12918 6  
Donor3-CATCGAACACGTCTCT-2 8145 80806 4  
Donor3-CATCGGGAGCCCTAAT-2 2496 5797 3  
Donor3-CATCGGGCATGTTGAC-2 3667 9386 2  
Donor3-CATGACACAGGTGCCT-2 4558 19686 4  
Donor3-CATGACATCTCACATT-2 1518 6934 8  
Donor3-CATGCCTAGGACACCA-2 1899 4934 13  
Donor3-CATGCCTAGGATTCGG-2 1718 7021 7  
Donor3-CATGCCTCAAGCGCTC-2 1253 6435 8  
Donor3-CATGCCTCAGTTGAC-2 1462 7205 8  
Donor3-CATTATCCATGTTGAC-2 1816 6848 7  
Donor3-CATTATCTCAGTTAGC-2 2513 4589 5  
Donor3-CATTGCTCCAGGGCT-2 1758 6257 9  
Donor3-CATTGCTCCTATGTT-2 3904 9669 3

Donor3-CATTCGCTCTGCCCTA-2 5262 17841 2  
Donor3-CCAATCCCACGAGGTA-2 3325 8066 4  
Donor3-CCAATCCGTTTACTG-2 1102 5547 8  
Donor3-CCAATCCTCAGTGTTG-2 3266 12915 10  
Donor3-CCACCTAAGAACAAC-2 1714 9622 8  
Donor3-CCACCTACAGTCCTTC-2 1335 5967 7  
Donor3-CCACGGATCCGAGCCA-2 1360 4572 9  
Donor3-CCACTACGTGAGGGTT-2 6500 29067 2  
Donor3-CCAGCGAAGAGGGATA-2 1198 4732 7  
Donor3-CCAGCGAAGATCTGAA-2 1603 4722 13  
Donor3-CCAGCGAGTTCATGGT-2 2070 7805 9  
Donor3-CCATGTCAGGATATAC-2 4587 20027 6  
Donor3-CCATGTCGTAATCACC-2 1811 4215 4  
Donor3-CCATGTCGTCCGTGAC-2 1740 5268 13  
Donor3-CCATTCGAGGCATTGG-2 1484 4213 7  
Donor3-CCCAATCAGAATGTGT-2 1776 6577 7  
Donor3-CCCAATCAGCCAGTTT-2 1403 5339 8  
Donor3-CCCAATCGTTGAGGTG-2 5148 19105 1  
Donor3-CCCAGTTAGAAACGCC-2 3290 11459 11  
Donor3-CCCAGTTAGCTGTTCA-2 1125 5689 8  
Donor3-CCCAGTTAGGGCATGT-2 1219 5837 8  
Donor3-CCCAGTTAGTAGTGCG-2 1163 4829 7  
Donor3-CCCAGTTTCTCACATT-2 6986 36404 5  
Donor3-CCGGGATAGCGTAATA-2 3217 17138 7  
Donor3-CCGGGATAGTACGACG-2 3408 26458 7  
Donor3-CCGGGATGTGATGTCT-2 1862 7035 13  
Donor3-CCGGTAGAGATGGGTC-2 1178 4567 8  
Donor3-CCGGTAGAGGAGTTGC-2 5168 17542 1  
Donor3-CCGGTAGAGGATATAC-2 5749 26981 4  
Donor3-CCGGTAGGTCAAAC-2 3387 12178 6  
Donor3-CCGGTAGTCACATGCA-2 2583 7123 4  
Donor3-CCGGTAGTCTGTACGA-2 1032 4112 8  
Donor3-CCGTGGAAGATGAGAG-2 3408 7779 3  
Donor3-CCGTGGAAGCTAGTGG-2 1483 8736 8  
Donor3-CCTAAAGAGTACGATA-2 4776 15231 4  
Donor3-CCTAAAGCATGTAGTC-2 1194 5400 8  
Donor3-CCTAAAGCATTGCGGC-2 4674 14302 6  
Donor3-CCTAAAGGTAAAGTCA-2 1636 5450 13  
Donor3-CCTAAAGTCATGGTCA-2 1503 5109 9  
Donor3-CCTACACGTATCAGTC-2 3172 16821 7  
Donor3-CCTACACGTTGATTTCG-2 1416 5974 7  
Donor3-CCTACACTCGATGAGG-2 1485 5935 8  
Donor3-CCTACCAAGATCTGCT-2 6736 41522 6  
Donor3-CCTACCAAGCTAAGAT-2 1313 6500 8  
Donor3-CCTACCAGTTCACCTC-2 7487 39966 2  
Donor3-CCTACCATCCCATTTA-2 6645 32072 6  
Donor3-CCTAGCTAGCTCAACT-2 1310 9034 8  
Donor3-CCTATTATCTACTATC-2 3274 7213 3  
Donor3-CCTATTATCTTTACAC-2 1705 11353 8  
Donor3-CCTCAGTTCGAGAACG-2 3525 8668 3  
Donor3-CCTCTGAAGACTGGGT-2 1596 6131 7  
Donor3-CCTCTGACAATGGAAT-2 1004 4619 8  
Donor3-CCTCTGACAGTCTTCC-2 2023 13473 8  
Donor3-CCTCTGAGTGTTGGT-2 1908 6281 7  
Donor3-CCTCTGATCAAGATCC-2 4322 11784 2  
Donor3-CCTCTGATCCTATTCA-2 2241 9688 9

Donor3-CCTCTGATCCTTGACC-2 1403 6010 7  
Donor3-CCTTACGCACAACGCC-2 1471 6572 8  
Donor3-CCTTACGCACGTCAGC-2 1087 4610 8  
Donor3-CCTTCCCAGTACGTAA-2 2733 5874 3  
Donor3-CCTTCCCCAGGATCGA-2 1367 4737 7  
Donor3-CCTTCCCCGTCTCAACA-2 1329 4346 7  
Donor3-CCTTCCCCGTTGCGAC-2 1746 7458 7  
Donor3-CCTTCGACACCCATTC-2 7378 55982 4  
Donor3-CCTTCGAGTAGCTGCC-2 5333 21338 5  
Donor3-CCTTTCTAGTGTTGAA-2 4623 11953 1  
Donor3-CCTTTCTCACGGTGTC-2 1379 7494 8  
Donor3-CCTTTCTGTTACTGAC-2 1598 7534 7  
Donor3-CGAACATAGCGTTCCG-2 1506 10363 8  
Donor3-CGAACATGTACCAGTT-2 1020 5396 8  
Donor3-CGAACATGTAGCGTCC-2 1821 12331 8  
Donor3-CGAACATGTCACTTCC-2 1537 4215 10  
Donor3-CGAATGTAGCAACGGT-2 1781 6463 10  
Donor3-CGAATGTCACCTATCC-2 2313 11036 7  
Donor3-CGAATGTTTCATCTGCC-2 4848 14931 5  
Donor3-CGACCTTAGGCACATG-2 3844 9846 4  
Donor3-CGACCTTGTTTCCACC-2 1600 4510 13  
Donor3-CGACTTCCACAACGTT-2 2632 14977 7  
Donor3-CGACTTCGTAAGGGCT-2 5886 24945 4  
Donor3-CGACTTCGTACAGACG-2 1221 4116 7  
Donor3-CGACTTCGTTACGTCA-2 1672 4645 13  
Donor3-CGACTTCTCATAGCAC-2 2072 9211 7  
Donor3-CGAGAAGAGACCTAGG-2 1683 7952 7  
Donor3-CGAGAAGCATACTACG-2 6343 42518 6  
Donor3-CGAGCACTCCGCGGTA-2 2617 5567 5  
Donor3-CGAGCCAGTTTTCGCTC-2 4500 11880 2  
Donor3-CGATCGGAGAATGTGT-2 1761 11153 8  
Donor3-CGATGGCCAATTCCTT-2 3692 17913 6  
Donor3-CGATGGCCATCTCGCT-2 4047 9501 1  
Donor3-CGATGGCCATTGGTAC-2 3820 9862 3  
Donor3-CGATGGCTCTCAACTT-2 6105 38513 6  
Donor3-CGATGTAGTAAGTTCC-2 3004 6951 3  
Donor3-CGATTGATCAGAGGTG-2 2260 13615 7  
Donor3-CGATTGATCCGCATCT-2 1792 4146 6  
Donor3-CGCCAAGTCAGTTCGA-2 2363 4768 5  
Donor3-CGCGGTAAGGTACTCT-2 3763 8820 1  
Donor3-CGCGGTACACAGTCGC-2 3516 9221 2  
Donor3-CGCTATCAGGTGCTAG-2 4629 14146 5  
Donor3-CGCTATCTCAGATAAG-2 6925 33937 6  
Donor3-CGCTATCTTTTAGTC-2 1043 4734 8  
Donor3-CGCTGGAAGCCTCGTG-2 1952 5329 10  
Donor3-CGCTGGAGTACCGTTA-2 3098 19211 7  
Donor3-CGCTGGAGTTAAGAAC-2 3363 8938 1  
Donor3-CGCTTCAAGACCCACC-2 1331 6821 8  
Donor3-CGCTTCAAGCGCTTAT-2 1385 5593 7  
Donor3-CGCTTCAGTAAGAGGA-2 5801 33650 6  
Donor3-CGGACACAGCAATCTC-2 2935 6660 3  
Donor3-CGGACACTCACCTCA-2 5716 36813 6  
Donor3-CGGACACTCGTAGATC-2 3261 18301 7  
Donor3-CGGACGTAGATAGTCA-2 4493 19963 6  
Donor3-CGGACGTCAATGGTCT-2 2217 8953 7  
Donor3-CGGACGTGTCCCGACA-2 3599 20685 7



Donor3-CGGACGTGTCTCGTTC-2 2488 9388 10  
Donor3-CGGACGTTACATAGC-2 679 4823 6  
Donor3-CGGACTGCACTTAACG-2 931 4427 8  
Donor3-CGGACTGGTAAGTAGT-2 2578 8056 4  
Donor3-CGGACTGGTGTTTGGT-2 1865 6282 13  
Donor3-CGGACTGTCTTACCGC-2 1685 8254 7  
Donor3-CGGAGCTGTACAGTGG-2 2196 4472 2  
Donor3-CGGAGCTTCGTAGGTT-2 4953 16105 6  
Donor3-CGGAGTCAGTGTCCAT-2 3557 15925 10  
Donor3-CGGAGTCTCTGAAAGA-2 1438 6456 8  
Donor3-CGGCTAGCAGACGCCT-2 5481 18005 2  
Donor3-CGGCTAGGTAGTACCT-2 6265 34095 6  
Donor3-CGGCTAGTCGGTTCGG-2 4410 12540 2  
Donor3-CGGGTCAAGCTGAACG-2 3803 9187 6  
Donor3-CGGGTCACAATGGAAT-2 3776 9634 5  
Donor3-CGGGTCAGTCTCTTAT-2 3195 7332 3  
Donor3-CGGGTCATCAGGCAAG-2 854 6145 8  
Donor3-CGGGTCATCATTGCGA-2 4683 22248 10  
Donor3-CGGTTAAAGCCACGCT-2 5253 24674 5  
Donor3-CGGTTAAAGTAGCCGA-2 1391 7192 8  
Donor3-CGGTTAAGTGGCTCCA-2 4745 19341 6  
Donor3-CGGTTAATCCTAGGGC-2 5426 18586 1  
Donor3-CGTAGCGCAAAGCGGT-2 1035 4429 8  
Donor3-CGTAGCGCACATAACC-2 5837 25974 6  
Donor3-CGTAGCGCATAGACTC-2 1724 5521 8  
Donor3-CGTAGCGCATCAGTCA-2 1968 7935 7  
Donor3-CGTAGGCGTCCCTTGT-2 7453 40589 5  
Donor3-CGTAGGCGTGAGGGTT-2 1697 4852 13  
Donor3-CGTAGGCGTGTGGGA-2 3981 13978 5  
Donor3-CGTCCATAGAGCCCAA-2 1386 5996 8  
Donor3-CGTCCATAGTAGCCGA-2 2506 5209 11  
Donor3-CGTCCATGTCAGCTAT-2 2383 8784 13  
Donor3-CGTCCATGTAAAGTAG-2 2872 15870 7  
Donor3-CGTCTACCAAGAAGAG-2 1971 5141 10  
Donor3-CGTCTACCAAGACACG-2 3531 8786 3  
Donor3-CGTCTACTCTGATACG-2 3788 10007 4  
Donor3-CGTGAGCAGACGACGT-2 1456 8511 8  
Donor3-CGTGAGCAGGACGAAA-2 4935 17160 6  
Donor3-CGTGAGCGTCTGCAAT-2 5022 23383 6  
Donor3-CGTGTCTAGGCAAAGA-2 1416 5768 8  
Donor3-CGTTAGAAGCGTCAAG-2 4369 23965 6  
Donor3-CGTTAGAAGGAGTTTA-2 3427 8373 3  
Donor3-CGTTAGACAAGTAGTA-2 3114 7146 3  
Donor3-CGTTAGAGTCGCATAT-2 1844 7990 7  
Donor3-CGTTAGATCCCAGGTG-2 3298 9404 6  
Donor3-CGTTAGATCCTAGGGC-2 1997 12305 7  
Donor3-CGTTAGATCTGTTTGT-2 2138 12867 7  
Donor3-CGTTCTGGTCGGATCC-2 2966 17164 7  
Donor3-CGTTGGGCAGCCTATA-2 5034 15961 3  
Donor3-CGTTGGGTCCGTTGCT-2 4171 11600 5  
Donor3-CTAAGACCAGGGAGAG-2 3273 7386 3  
Donor3-CTAAGACGTAAACACA-2 1041 5519 8  
Donor3-CTAAGACTCGAGAACG-2 2506 8598 13  
Donor3-CTAAGACTCTACCAGA-2 2341 7348 8  
Donor3-CTAAGACTCTGAAAGA-2 2034 6399 13  
Donor3-CTAATGGCAGTTCATG-2 3177 6741 3

Donor3-CTAATGGTCTTCAACT-2 1251 4376 7  
Donor3-CTACACCGTACTTGAC-2 1304 4876 8  
Donor3-CTACACCGTCAGAATA-2 2469 11781 7  
Donor3-CTACACCTCATCGGAT-2 4223 13062 5  
Donor3-CTACATTAGAAACCTA-2 5319 16933 1  
Donor3-CTACATTAGTTTCCTT-2 3643 9323 2  
Donor3-CTACCCAGTTGAGGTG-2 2213 8074 6  
Donor3-CTACCCAGTTGGAGGT-2 3587 9106 3  
Donor3-CTACGTCAGTACACCT-2 2202 12608 7  
Donor3-CTACGTCCAAACGTGG-2 4439 35214 7  
Donor3-CTACGTCCAAGCTGAG-2 2016 5483 13  
Donor3-CTACGTCCATACTCTT-2 1357 6354 8  
Donor3-CTAGAGTAGATCGGGT-2 1819 11282 8  
Donor3-CTAGAGTCATGTAAGA-2 2223 9611 7  
Donor3-CTAGAGTGTTTAGCTG-2 4923 14977 1  
Donor3-CTAGAGTCCGCATCT-2 5716 19872 5  
Donor3-CTAGCCTAGCAAATCA-2 2603 5788 1  
Donor3-CTAGCCTAGGCTCAGA-2 1846 4270 4  
Donor3-CTAGCCTCAATGCCAT-2 2226 7219 13  
Donor3-CTAGCCTTCAGTACGT-2 6674 29373 1  
Donor3-CTAGTGAAGCCAACAG-2 1913 5718 13  
Donor3-CTAGTGAAGGGCTCTC-2 5240 22367 6  
Donor3-CTAGTGAAGTCAAGGC-2 3978 14905 6  
Donor3-CTAGTGAGTAGCGATG-2 1833 6078 13  
Donor3-CTAGTGAGTTATCCGA-2 1759 9547 8  
Donor3-CTAGTGAGTTGATTCG-2 2961 7061 5  
Donor3-CTCACACAGTACACCT-2 1154 5383 8  
Donor3-CTCACACCACACATGT-2 2087 6449 9  
Donor3-CTCACACCAGTCAGCC-2 1019 4413 8  
Donor3-CTCACACTCCACTGGG-2 1100 4626 8  
Donor3-CTCACACTCTCTGAGA-2 2449 15275 7  
Donor3-CTCAGAAAGAGGTTGC-2 3266 7992 3  
Donor3-CTCAGAACAGACAAGC-2 1518 7618 8  
Donor3-CTCATTAGTCATGCCG-2 1300 5473 7  
Donor3-CTCCTAGGTTACCGAT-2 2331 8837 9  
Donor3-CTCGAAAAGTCTTGCA-2 2488 4427 5  
Donor3-CTCGAAACATGCGCAC-2 2659 5853 3  
Donor3-CTCGAAACATTTTCAGG-2 1486 4853 9  
Donor3-CTCGAAATCGACGGAA-2 4372 24425 6  
Donor3-CTCGAAATCTACTTAC-2 4649 12052 2  
Donor3-CTCGAGGTCAGAAATG-2 5001 15477 5  
Donor3-CTCGGAGAGTTAGGTA-2 1020 4719 8  
Donor3-CTCGGAGGTACACCGC-2 2453 6919 6  
Donor3-CTCGGAGGTCCAATA-2 2088 7035 6  
Donor3-CTCGGGATCGGATGGA-2 1617 6135 7  
Donor3-CTCGGGATCTAACTTC-2 3553 8678 3  
Donor3-CTCGTACAGCCAGTAG-2 5412 17290 1  
Donor3-CTCGTCAAGCAACGGT-2 1151 6048 8  
Donor3-CTCGTCAGTACAAGTA-2 5431 17270 1  
Donor3-CTCTGGTGTCTCCACT-2 1587 9711 8  
Donor3-CTGAAGTGTCCGTGAC-2 3574 15856 6  
Donor3-CTGATAGCATGTTCCC-2 2986 6499 2  
Donor3-CTGATAGGTATATGAG-2 1236 6322 8  
Donor3-CTGATAGTCCGGGTGT-2 1567 9257 8  
Donor3-CTGATAGTCCTATTCA-2 1079 4416 8  
Donor3-CTGATCCAGTTCGCGC-2 2213 7034 13

Donor3-CTGATCCCAAAGCGGT-2 7342 40222 6  
Donor3-CTGATCCCACAACGT-2 1897 4145 6  
Donor3-CTGATCCGTACCGGCT-2 3827 9830 3  
Donor3-CTGATCCTCCCATTTA-2 1099 4675 7  
Donor3-CTGCCTAAGCGTTCCG-2 2022 5815 13  
Donor3-CTGCCTATCCAAATGC-2 1629 6990 8  
Donor3-CTGCTGTGTAAGAGGA-2 5598 23919 5  
Donor3-CTGCTGTGTAGTAGTA-2 6044 23494 3  
Donor3-CTGCTGTTCGCAGGCT-2 4759 14942 1  
Donor3-CTGCTGTTCTTAGAGC-2 5359 28395 6  
Donor3-CTGGTCTAGAGCTATA-2 1635 6053 7  
Donor3-CTGGTCTAGATCCCGC-2 1293 4466 12  
Donor3-CTGGTCTCACACATGT-2 1730 8103 8  
Donor3-CTGGTCTCAGGTCCAC-2 1258 4887 8  
Donor3-CTGGTCTTCAAACAAG-2 1587 9315 8  
Donor3-CTGTGCTAGCACCGCT-2 5568 31526 4  
Donor3-CTGTGCTCAGGGCATA-2 3461 9743 3  
Donor3-CTGTTTACAAGGTTCT-2 1671 4858 6  
Donor3-CTGTTTAGTAGAGTGC-2 2108 6831 9  
Donor3-CTGTTTATCGCGCAA-2 1885 7860 7  
Donor3-CTTAACTCAGGACCCT-2 1603 4526 10  
Donor3-CTTACCGCACGAGAGT-2 4268 26238 7  
Donor3-CTTACCGCATTACCTT-2 5049 15638 2  
Donor3-CTTACCGTCCGACGT-2 2272 5910 5  
Donor3-CTTACCGTCACCACCT-2 1002 4679 8  
Donor3-CTTACCGTCACTATTC-2 1201 5459 8  
Donor3-CTTACCGTCAGTGTG-2 4676 14939 2  
Donor3-CTTACCGTCTATGTGG-2 2833 17459 7  
Donor3-CTTAGGAAGTCCCACG-2 1611 4246 6  
Donor3-CTTCTCTAGACCCACC-2 3356 8498 6  
Donor3-CTTCTCTCAGCGTCCA-2 3804 9188 3  
Donor3-CTTCTCTCATGTAAGA-2 3238 11089 7  
Donor3-CTTCTCTGTCGGCACT-2 1653 6501 7  
Donor3-CTTCTCTGTTTGCATG-2 2045 8379 7  
Donor3-CTTCTCTTCGTCCGTT-2 1436 7633 8  
Donor3-CTTCTCTTCTGATTCT-2 2466 5974 6  
Donor3-CTTTGCGAGCTTTGGT-2 3645 9033 3  
Donor3-CTTTGCGCAGTTCATG-2 1015 4586 8  
Donor3-CTTTGCGCATTATCTC-2 2010 8986 7  
Donor3-GAAATGAGTCGGCTCA-2 2090 7579 13  
Donor3-GAAATGATCACTGGGC-2 1303 4531 13  
Donor3-GAACATCCAGACGTAG-2 6460 35394 5  
Donor3-GAACATCGTTCGGCA-2 4754 15554 3  
Donor3-GAACCTAGTTTAAGCC-2 1049 5358 8  
Donor3-GAACGGAAGACTCGGA-2 2951 6600 6  
Donor3-GAACGGAAGGCTCATT-2 1531 6165 8  
Donor3-GAACGGATCCTACAGA-2 1504 4492 13  
Donor3-GAACGGATCGAGGTAG-2 1500 4256 13  
Donor3-GAACGGATCTTACCTA-2 8816 59489 6  
Donor3-GAAGCAGGTCCAAGTT-2 1084 5385 8  
Donor3-GAAGCAGTCAGGCCCA-2 6080 26768 5  
Donor3-GAAGCAGTCGGCTTGG-2 4076 27260 7  
Donor3-GAATAAGAGCGCTTAT-2 3298 16931 7  
Donor3-GAATAAGCATGGTCAT-2 4076 10993 1  
Donor3-GACACGCTCCGAACGC-2 3588 8893 3  
Donor3-GACAGAGCATAGACTC-2 1106 4332 7

Donor3-GACAGAGTCACAATGC-2 2022 4266 4  
Donor3-GACCAATAGGGTATCG-2 1499 5646 8  
Donor3-GACCAATCAAATACAG-2 3567 8533 3  
Donor3-GACCAATCAAGAAAGG-2 1865 14603 8  
Donor3-GACCAATCACAGACAG-2 1957 5009 10  
Donor3-GACCAATCAGTATAAG-2 2755 10853 6  
Donor3-GACGCGTAGAAAGTGG-2 1627 4110 13  
Donor3-GACGCGTGTTCCTCATT-2 4048 10810 6  
Donor3-GACGCGTTCCTTTACGT-2 2703 11880 6  
Donor3-GACGGCTTCACGATGT-2 6623 40829 6  
Donor3-GACGGCTTCGAATCCA-2 3261 17327 7  
Donor3-GACGTGCAGACTGGGT-2 3735 7861 6  
Donor3-GACGTGCCATTTGCTT-2 2835 13308 7  
Donor3-GACGTGCTCTGCTGCT-2 2844 4973 5  
Donor3-GACGTTAAGCCACCTG-2 3522 8599 4  
Donor3-GACGTTACACAGGCCT-2 2336 7873 6  
Donor3-GACTAACGTACAAGTA-2 2072 6107 10  
Donor3-GACTAACGTATATGGA-2 1881 6230 9  
Donor3-GACTACACATGTAGTC-2 2090 9618 7  
Donor3-GACTACAGTCCATGAT-2 4470 13001 4  
Donor3-GACTGCGAGACTGTAA-2 1715 6892 7  
Donor3-GACTGCGGTTTCGCTC-2 961 4527 8  
Donor3-GAGCAGACAGGCGATA-2 3434 7877 3  
Donor3-GAGCAGACAGTCAGCC-2 2642 5547 3  
Donor3-GAGGTGACAAAGAATC-2 2071 8128 9  
Donor3-GAGGTGATCAACACCA-2 3653 9882 6  
Donor3-GAGGTGATCCGTAGTA-2 1390 8616 8  
Donor3-GAGTCCGAGGCTATCT-2 2642 5766 5  
Donor3-GAGTCCGGTTCCTCGAG-2 2216 6834 9  
Donor3-GAGTCCGTCCCCTTG-2 1945 5268 13  
Donor3-GAGTCCGTCCGCGGTA-2 1710 6478 9  
Donor3-GATCAGTAGATGTGGC-2 1876 6877 9  
Donor3-GATCAGTCAACTGGCC-2 1384 4724 9  
Donor3-GATCGATGTTCCACGG-2 2569 13083 7  
Donor3-GATCGATTCAAGATCC-2 3403 7987 3  
Donor3-GATCGATTCTGAGTGT-2 2083 8963 7  
Donor3-GATCGCGGTGCAGGTA-2 1571 5474 7  
Donor3-GATCGTACAGCCAATT-2 7307 36588 5  
Donor3-GATCGTACAGCTTCGG-2 2964 6564 3  
Donor3-GATCGTATCAATAAGG-2 6308 26814 4  
Donor3-GATCTAGAGTACGTTC-2 7089 37247 5  
Donor3-GATCTAGTCGCTGATA-2 1282 8092 8  
Donor3-GATGAGGAGCAATATG-2 4145 9988 5  
Donor3-GATGCTACACATCTTT-2 1041 4322 8  
Donor3-GATGCTAGTAAATACG-2 2405 10057 7  
Donor3-GATTCAGCAAGAAGAG-2 7157 30023 1  
Donor3-GATTCAGCACAGATTC-2 4717 14116 5  
Donor3-GCAAACCTCAATCCAAC-2 4268 16557 6  
Donor3-GCAAACCTTCACAGGCC-2 1374 4384 13  
Donor3-GCAAACCTTCGGTTGCT-2 2143 12171 8  
Donor3-GCAAACCTTCGTTACGA-2 4471 12764 4  
Donor3-GCAATCAAGATGCCAG-2 1755 10120 8  
Donor3-GCAATCAAGTGACTCT-2 3995 10165 3  
Donor3-GCAATCACATTAACCG-2 1543 6100 9  
Donor3-GCAATCATCAGTTAGC-2 5314 34702 6  
Donor3-GCAATCATCGTCTGCT-2 4827 21368 6

Donor3-GCACATAAGTGGTAAT-2 3663 14074 6  
Donor3-GCACATACAGACGTAG-2 4987 16596 6  
Donor3-GCACTCTAGCCACGCT-2 2548 11295 7  
Donor3-GCACTCTAGCGAAGGG-2 2335 12933 7  
Donor3-GCACTCTAGGTGATAT-2 6336 45414 5  
Donor3-GCAGCCAAGAACTCGG-2 3211 7431 3  
Donor3-GCAGCCATCACCTTAT-2 1587 5302 6  
Donor3-GCAGTTATCGAATGCT-2 2223 7394 6  
Donor3-GCAGTTATCGCTTAGA-2 3499 8583 3  
Donor3-GCATAACAAGAATTCCC-2 4988 16284 2  
Donor3-GCATAACAGTAAGAGGA-2 1275 5207 7  
Donor3-GCATAACAGTAGCACGA-2 1686 10105 8  
Donor3-GCATGATAGTCCTCCT-2 4210 10918 3  
Donor3-GCATGATCAAAGGTGC-2 3067 7505 6  
Donor3-GCATGATCATTGGTAC-2 5335 32073 6  
Donor3-GCATGCGAGAAGTGT-2 1574 10486 8  
Donor3-GCATGCGCAAGAGTCG-2 3118 7343 3  
Donor3-GCATGCGTCGTGACAT-2 1464 7456 8  
Donor3-GCATGTAGTCTTCGTC-2 4529 12255 1  
Donor3-GCATGTAGTTCGTCTC-2 6701 24895 2  
Donor3-GCATGTATCAGCAACT-2 1830 8178 7  
Donor3-GCCAAATCAACTGGCC-2 1189 5454 8  
Donor3-GCCAAATTCAGTACGT-2 1737 4887 13  
Donor3-GCCAAATTCCTTACGT-2 3973 14341 5  
Donor3-GCCTCTAAGGTGTGGT-2 3000 6230 6  
Donor3-GCCTCTAGTTAGTGGG-2 6278 23051 1  
Donor3-GCCTCTAGTTCAGGCC-2 1548 5947 7  
Donor3-GCCTCTATCCCATTAT-2 5479 22621 5  
Donor3-GCCTCTATCTTCAACT-2 1573 8839 8  
Donor3-GCGACCAAGCAGCGTA-2 1073 4519 8  
Donor3-GCGACCAGTTCGGCAC-2 1245 6755 8  
Donor3-GCGAGAACATCACCT-2 2289 19566 8  
Donor3-GCGAGAAGTCTAGTGT-2 4916 16076 1  
Donor3-GCGCAACCAAACCTAC-2 3901 19094 10  
Donor3-GCGCAACCACGGCTAC-2 2486 4968 3  
Donor3-GCGCAACGTGACTCAT-2 5165 21867 5  
Donor3-GCGCAGTAGCCGATTT-2 1373 7299 8  
Donor3-GCGCAGTGTCTCCACT-2 3360 7043 2  
Donor3-GCGCAGTGTGATAAGT-2 1557 7546 7  
Donor3-GCGCCAACACCAGCAC-2 6129 26366 4  
Donor3-GCGCCAATCCATTCTA-2 4800 14342 5  
Donor3-GCGCGATAGATATGCA-2 1258 6183 8  
Donor3-GCGCGATGTTCCACTC-2 3863 10570 3  
Donor3-GCGCGATTCTACGAGT-2 1221 7296 8  
Donor3-GCTCCTAAGGGTATCG-2 3836 8876 6  
Donor3-GCTCCTATCAAGCCTA-2 4779 14896 4  
Donor3-GCTCTGTTCCCTTGCCA-2 3203 8300 3  
Donor3-GCTGCAGAGCCGCCTA-2 1423 6711 8  
Donor3-GCTGCAGTCAACACCA-2 1723 8319 8  
Donor3-GCTGCGACAGCGAACA-2 2059 9911 7  
Donor3-GCTGCTTAGATCCGAG-2 3116 6785 3  
Donor3-GCTGCTTTCGAACGGA-2 5715 24556 6  
Donor3-GCTGGGTAGCGATTCT-2 3617 9227 3  
Donor3-GCTTCCAAGAATTCCC-2 2115 6042 10  
Donor3-GCTTCCAAGGTGATTA-2 4018 20668 6  
Donor3-GCTTGAACAAGCCGCT-2 2141 7696 9

Donor3-GCTTGAACATGCAATC-2 2213 19033 8  
Donor3-GCTTGAATCGTCGTTC-2 1361 6099 7  
Donor3-GGAAAGCAGCTTTGGT-2 3510 19113 6  
Donor3-GGAAAGCAGTGTCCAT-2 4328 12364 2  
Donor3-GGAAAGCGTGAAGGCT-2 1311 6453 8  
Donor3-GGAAAGCTCCACGACG-2 4887 20953 6  
Donor3-GGAAAGCTCCTTAATC-2 2925 11581 6  
Donor3-GGAACTTCATCACAAC-2 1989 8435 7  
Donor3-GGAACTTGTAATTGGA-2 1150 4343 7  
Donor3-GGAACTTGATACATGTC-2 1702 4925 7  
Donor3-GGAACTTTCAGTCAGT-2 3443 18941 7  
Donor3-GGAACTTTCGCGTTTC-2 2018 5363 11  
Donor3-GGACAAGCACCGAAAG-2 1430 4175 13  
Donor3-GGACAAGCATCGACGC-2 1377 8468 8  
Donor3-GGACAAGTCTGCTTGC-2 1915 11593 7  
Donor3-GGACAGACAAGCGATG-2 7263 45203 5  
Donor3-GGACAGATCCGCGGTA-2 1731 5825 13  
Donor3-GGACATTCAGTAAGAT-2 3440 7840 3  
Donor3-GGACATTTCAACGGCC-2 2163 5183 11  
Donor3-GGACGTCTCAGGCGAA-2 1801 4881 13  
Donor3-GGATGTTAGCGTAATA-2 1604 4789 9  
Donor3-GGATGTTGTATAGTAG-2 1083 5734 8  
Donor3-GGATTACTCCCGACTT-2 6453 39121 6  
Donor3-GGATTACTCTGGCGTG-2 1939 13311 8  
Donor3-GGCAATTTCCAGGGCT-2 2798 6912 5  
Donor3-GGCCGATTCGCTTGTC-2 1213 5590 8  
Donor3-GGCCGATTCCTTCTTC-2 1658 4880 13  
Donor3-GGCGACTAGAATGTTG-2 2577 15566 7  
Donor3-GGCGACTAGCGTTTAC-2 3184 14343 6  
Donor3-GGCGACTCAATCTACG-2 1976 5312 13  
Donor3-GGCGACTCAGAAGCAC-2 1607 6132 7  
Donor3-GGCGTGTCATCAGAA-2 1746 5157 6  
Donor3-GGCTCGACAAGCCGTC-2 1603 6184 9  
Donor3-GGCTCGACATCCTTGC-2 4759 23405 6  
Donor3-GGCTGGTAGGGCTTCC-2 1927 6442 7  
Donor3-GGCTGGTCAAGACACG-2 1590 8252 8  
Donor3-GGCTGGTCACTTCGAA-2 4022 10028 5  
Donor3-GGCTGGTGTACAGTGG-2 1145 5991 8  
Donor3-GGGAATGAGCGTTCCG-2 1646 6226 9  
Donor3-GGGAATGGTTGCTCCT-2 1293 4187 9  
Donor3-GGGACCTCAGAGTGTG-2 1487 4609 13  
Donor3-GGGACCTCAGATCGGA-2 5738 30393 4  
Donor3-GGGAGATAGGGCACTA-2 1817 8580 7  
Donor3-GGGAGATTCCTTGGTC-2 6148 24934 2  
Donor3-GGGATGAAGTTACCCA-2 4083 10830 5  
Donor3-GGGATGACATTACCTT-2 1567 4606 13  
Donor3-GGGATGAGTCTCTTTA-2 1144 4751 8  
Donor3-GGGCACTCAAAGCAAT-2 3205 7492 4  
Donor3-GGGCACTCAAGTTGTC-2 1925 12134 8  
Donor3-GGGCACTTCGTGTAGT-2 4141 12674 5  
Donor3-GGGCATCAGGCTAGAC-2 2231 7204 6  
Donor3-GGGCATCAGTGTACCT-2 2114 6057 6  
Donor3-GGGCATCCAAAGCAAT-2 4234 12042 6  
Donor3-GGGTCTGAGTAAGTAC-2 4683 14023 2  
Donor3-GGGTCTGGTGACTION-2 1094 4536 8  
Donor3-GGGTTGCCACCAACCG-2 3532 8466 2

Donor3-GGGTTGCTCCAGAAGG-2 1233 5497 8  
Donor3-GGGTTGCTCGTGACAT-2 3000 6944 3  
Donor3-GGGTTGCTCTACTCAT-2 2544 10471 7  
Donor3-GGTATTGAGCGCCTTG-2 1881 5015 9  
Donor3-GGTATTGCATGAAGTA-2 5910 46051 6  
Donor3-GGTATTGTCTCGGACG-2 1902 10316 7  
Donor3-GGTGAAGAGAGAACAG-2 8998 66224 5  
Donor3-GGTGAAGAGCCTTGAT-2 2111 10168 7  
Donor3-GGTGAAGCATTCTCAT-2 1726 6317 9  
Donor3-GGTGAAGTCGTTGCCT-2 5634 22063 6  
Donor3-GGTGCGTAGAGTACCG-2 1172 4787 7  
Donor3-GGTGCGTAGCTGCAAG-2 4950 16267 2  
Donor3-GGTGCGTTCGAACGGA-2 1546 6012 7  
Donor3-GGTGCGTTCGGTTAAC-2 5163 16259 1  
Donor3-GGTGCGTTCGTCGTTC-2 3154 16104 7  
Donor3-GTAAACGTCAACAACCT-2 1674 4668 7  
Donor3-GTAACTGTCCTTTCGG-2 4843 14871 6  
Donor3-GTAACTGTCTTCTGGC-2 4803 25728 4  
Donor3-GTACGTATCTCGAGTA-2 5769 25455 2  
Donor3-GTACGTATCTGGTGTA-2 2716 8183 6  
Donor3-GTACGTATCTTGCCGT-2 1553 8504 8  
Donor3-GTACTCCGTGTGACGA-2 1551 9266 8  
Donor3-GTACTCCTCTTGCAAG-2 1381 4887 7  
Donor3-GTACTTTAGTAGCCGA-2 2914 9702 4  
Donor3-GTACTTTAGTCTCGGC-2 1440 6050 7  
Donor3-GTACTTTGTTGGTTTG-2 4372 11241 1  
Donor3-GTACTTTTCTTCAACT-2 1937 11421 7  
Donor3-GTAGTCAGTGCCGGT-2 4444 12040 2  
Donor3-GTATCTTCATCTATGG-2 2509 5171 3  
Donor3-GTATCTTGTCTGCGGT-2 2950 6510 3  
Donor3-GTATTCTAGAGAACAG-2 1245 4098 7  
Donor3-GTATTCTGTGGCTCCA-2 5229 15675 2  
Donor3-GTATTCTGTTATCACG-2 1119 5683 8  
Donor3-GTCAAGTAGCACCGTC-2 5055 16017 3  
Donor3-GTCAAGTAGTACCGGA-2 1345 6394 8  
Donor3-GTCAAGTCACACTGCG-2 2948 6604 3  
Donor3-GTCACAAAGTTTCGATC-2 1517 10430 8  
Donor3-GTCACGGAGATCGATA-2 1790 6440 7  
Donor3-GTCACGGCACCTCGGA-2 2706 22479 7  
Donor3-GTCACGGGTCGCTTTC-2 1264 7885 8  
Donor3-GTCACGGTCGAATGCT-2 2421 10230 7  
Donor3-GTCATTTTCAGTCCTTC-2 1634 4871 13  
Donor3-GTCCTCAAGTTAAGTG-2 4025 15482 4  
Donor3-GTCCTCACACAGCCCA-2 2095 6336 13  
Donor3-GTCCTCACATTATCTC-2 1316 7148 8  
Donor3-GTCGGGTAGCCTATGT-2 1616 5498 7  
Donor3-GTCGGGTGTCACTGGC-2 1320 5234 7  
Donor3-GTCTTCGCAGGCGATA-2 2140 12924 8  
Donor3-GTCTTCGCATTCACTT-2 2116 7066 7  
Donor3-GTGCAGCAGAGTCGGT-2 5377 20291 6  
Donor3-GTGCATAAGTCGATAA-2 2518 5490 5  
Donor3-GTGCATAAGTGTCCAT-2 1850 6577 6  
Donor3-GTGCATACAGCGTTCG-2 3001 6696 5  
Donor3-GTGCATAGTGTTGGGA-2 3873 9988 2  
Donor3-GTGCGGTCATGTAGTC-2 2445 5909 6  
Donor3-GTGCGGTGTCCGACGT-2 1090 4548 8

Donor3-GTGC GGTTCAATACCG-2 1399 4295 9  
Donor3-GTGCTTCGTAGTAGTA-2 1995 5687 13  
Donor3-GTGTGCGAGACGCTTT-2 1808 11532 8  
Donor3-GTGTGCGAGATATGGT-2 5240 22120 5  
Donor3-GTGTGCGAGGCTCAGA-2 2259 8238 10  
Donor3-GTGTGCGTCTGGGCCA-2 1481 4744 6  
Donor3-GTGTTAGAGGAGTAGA-2 3431 15371 6  
Donor3-GTGTTAGAGGGAAACA-2 1092 4656 8  
Donor3-GTGTTAGAGTGACATA-2 6236 23787 6  
Donor3-GTGTTAGGTCCGAGTC-2 2166 9663 7  
Donor3-GTTACAGGTTGTGGCC-2 1518 4710 13  
Donor3-GTTCGGGGTTACGACT-2 1777 6411 7  
Donor3-GTTCTCGAGACCGGAT-2 2058 6041 13  
Donor3-GTTCTCGCAGGATCGA-2 6030 24079 5  
Donor3-GTTCTCGGTAGGACAC-2 1427 4592 13  
Donor3-GTTCTCGGTCAACATC-2 4171 11456 5  
Donor3-GTTCTCGTCTTCCTTC-2 2392 6981 13  
Donor3-GTTTCTACAATGGACG-2 1896 8526 7  
Donor3-TAAACCGAGGTAAACT-2 5060 16063 6  
Donor3-TAAACCGTCTCTTATG-2 1207 5634 8  
Donor3-TAAGAGAAGACAAGCC-2 1149 5816 8  
Donor3-TAAGAGAGTAGAAGGA-2 4092 23514 7  
Donor3-TAAGCGTAGGCTAGCA-2 1958 7239 10  
Donor3-TAAGCGTTCGCCAAAT-2 3666 9245 3  
Donor3-TAAGTGCCAAACCCAT-2 5573 21842 4  
Donor3-TACACGATCCTCTAGC-2 8428 53870 6  
Donor3-TACCTATAGGAGTACC-2 4297 11558 4  
Donor3-TACCTATCATCCGGGT-2 3873 18742 6  
Donor3-TACGGATCAGCGTCCA-2 5651 21591 5  
Donor3-TACGGATCATCCCATC-2 6736 30558 2  
Donor3-TACGGATGTCAAAGCG-2 2094 6054 4  
Donor3-TACGGGCAGAGGGATA-2 3623 8946 4  
Donor3-TACGGGCAGCCCTAAT-2 1890 9580 7  
Donor3-TACGGGCCACAGAGGT-2 2853 6764 3  
Donor3-TACGGGCGTCAGTGGA-2 3841 8728 5  
Donor3-TACGGGCTCGTTGCCT-2 3706 10216 4  
Donor3-TACGGGCTCTCTTGAT-2 2261 10403 7  
Donor3-TACGGTACAATACGCT-2 1411 8559 8  
Donor3-TACGGTAGTCCATGAT-2 2629 4697 6  
Donor3-TACGGTAGTGATAAGT-2 3059 7326 1  
Donor3-TACGGTATCTCATTCA-2 4066 10965 5  
Donor3-TACTCATAGATAGGAG-2 1530 10261 8  
Donor3-TACTCATAGTGGTAAT-2 2298 7165 11  
Donor3-TACTCGCAGTGGTCCC-2 1712 7040 9  
Donor3-TACTCGCGTATATCCG-2 1509 4091 13  
Donor3-TACTCGCGTATCACCA-2 1035 4557 8  
Donor3-TACTTACAGATCCCAT-2 5971 20258 3  
Donor3-TACTTACAGGAATGGA-2 984 4404 8  
Donor3-TACTTACGTCTTGTC-2 2533 11981 7  
Donor3-TACTTACTCTGGAGCC-2 2856 19677 8  
Donor3-TACTTGTGTCGCGTGT-2 2366 5457 2  
Donor3-TAGACCAGTAATCGTC-2 2972 6721 3  
Donor3-TAGACCATCAGGCAAG-2 1855 7257 9  
Donor3-TAGAGCTCAGGTCCAC-2 2378 7893 10  
Donor3-TAGAGCTGTTACGGAG-2 1859 5742 6  
Donor3-TAGAGCTGTTTAGGAA-2 1621 4359 10



Donor3-TAGAGCTTCAGGTAAA-2 1741 7737 7  
Donor3-TAGAGCTTCATGCTCC-2 5579 23488 2  
Donor3-TAGCCGGAGTATTGGA-2 5341 20367 4  
Donor3-TAGCCGGAGTCCATAC-2 903 4240 8  
Donor3-TAGCCGGCACACCGCA-2 2051 8758 7  
Donor3-TAGGCATAGTGTCCCG-2 1183 4965 8  
Donor3-TAGGCATGTGTGACCC-2 6392 24189 1  
Donor3-TAGGCATGTTCCGGCA-2 2308 14068 7  
Donor3-TAGGCATTCCTGTACC-2 1684 7446 7  
Donor3-TAGTGGTCATGAGCGA-2 7331 37436 5  
Donor3-TAGTTGGCATACTACG-2 1702 10568 8  
Donor3-TAGTTGGTCACATACG-2 4046 10208 3  
Donor3-TATCAGGGTGTGACCC-2 3933 16211 6  
Donor3-TATCTCAAGTAATCCC-2 1033 5225 8  
Donor3-TATCTCAGTTAAAGTG-2 918 4394 8  
Donor3-TATCTCATCCGCTGTT-2 1906 5723 13  
Donor3-TATGCCAGAAACGCC-2 3286 13231 6  
Donor3-TATTACCAGTGTCTCA-2 1646 4066 11  
Donor3-TATTACCCAATAGCGG-2 2585 8449 6  
Donor3-TATTACCCAATGAAAC-2 1797 11948 8  
Donor3-TCAACGAAGGAGTCTG-2 1691 11500 8  
Donor3-TCAACGACATGACGGA-2 3158 7831 4  
Donor3-TCAACGACATGTCCTC-2 1237 4545 8  
Donor3-TCAATCTCACAACGCC-2 1413 4192 13  
Donor3-TCAATCTGTATCAGTC-2 8139 52663 5  
Donor3-TCACAAGTCACCACCT-2 2292 6445 4  
Donor3-TCACGAAGTCTTGATG-2 5229 17156 1  
Donor3-TCAGATGAGGTGCAAC-2 5121 19039 2  
Donor3-TCAGATGTCCAAGTAC-2 2955 10140 11  
Donor3-TCAGATGTCTACGAGT-2 1294 4940 7  
Donor3-TCAGCAACACCCATTC-2 3425 21385 7  
Donor3-TCAGCAACATTTGCTT-2 2121 6426 10  
Donor3-TCAGCTCCACGAGAGT-2 1466 6150 7  
Donor3-TCAGCTCCATACCATG-2 3760 9451 3  
Donor3-TCAGCTCGTGAAATCA-2 2917 6484 6  
Donor3-TCAGCTCTCCGCGGTA-2 1197 6919 8  
Donor3-TCAGGATAGCTAAACA-2 1431 9378 8  
Donor3-TCAGGTACATCGATGT-2 2879 5859 6  
Donor3-TCAGGTATCCTGCAGG-2 5985 26652 5  
Donor3-TCAGGTATCCTTTCTC-2 3942 9850 4  
Donor3-TCATTACCAAGGTTCT-2 2049 5478 10  
Donor3-TCATTACTCATGCTCC-2 1592 6304 7  
Donor3-TCATTTGAGCTAGTCT-2 2514 4980 5  
Donor3-TCATTTGCAGCTCCGA-2 6021 24480 6  
Donor3-TCATTTGGTCGCTTCT-2 1819 4433 10  
Donor3-TCATTTGGTGACGCCT-2 4674 14327 5  
Donor3-TCATTTGTCTTGTTTG-2 4425 13350 5  
Donor3-TCCACACCATATACGC-2 1484 4410 13  
Donor3-TCCACACCATTACGAC-2 3960 9661 5  
Donor3-TCCACACGTCGACTAT-2 6770 34150 4  
Donor3-TCCCGATAGAACTGTA-2 1307 6175 8  
Donor3-TCCCGATAGCTGGAAC-2 1822 8844 8  
Donor3-TCCCGATAGGTTACCT-2 1557 7854 7  
Donor3-TCCCGATCATGCTAGT-2 6597 31451 5  
Donor3-TCCCGATTCTAACCGA-2 4243 12218 2  
Donor3-TCCCGATTCTTAGAGC-2 1631 8095 7

Donor3-TCGAGGCCATAGACTC-2 5217 20877 5  
Donor3-TCGAGGCTCAACGCTA-2 3404 7975 2  
Donor3-TCGAGGCTCTCGCTTG-2 1538 4271 13  
Donor3-TCGCGAGAGGCCATAG-2 1520 7127 8  
Donor3-TCGCGAGCAACTGCGC-2 3118 17676 7  
Donor3-TCGCGAGTCTATCCCG-2 2255 19978 8  
Donor3-TCGCGTTCAGAGTGTG-2 3115 15626 7  
Donor3-TCGCGTTGTCGCGAAA-2 1823 9480 7  
Donor3-TCGGGACTCGTCACGG-2 3201 7710 2  
Donor3-TCGGTAAAGGAGTAGA-2 1862 6090 13  
Donor3-TCGTACCAGCTGGAAC-2 2098 6112 13  
Donor3-TCGTACCGTATTCTCT-2 2517 8157 10  
Donor3-TCGTACCTCTTAGCCC-2 1152 5696 8  
Donor3-TCGTAGAAGCAGATCG-2 4932 19663 6  
Donor3-TCGTAGAGTTCAGCGC-2 1181 5186 8  
Donor3-TCGTAGATCGTACGGC-2 2218 8465 7  
Donor3-TCTATTGTCATAAAGG-2 5181 31653 6  
Donor3-TCTCATATCACATACG-2 1453 6680 8  
Donor3-TCTCTAACACGTAAGG-2 3565 8775 3  
Donor3-TCTGAGACACAGACAG-2 2119 5090 5  
Donor3-TCTGAGAGTGACTION-2 1695 6795 7  
Donor3-TCTGAGAGTGTAACGG-2 2982 6886 6  
Donor3-TCTGGAAGTGTGCCTG-2 972 4255 8  
Donor3-TCTGGAAGTTGGTGGA-2 1249 5501 8  
Donor3-TCTTCGGAGGCTAGCA-2 1112 4525 8  
Donor3-TGAAAGAAGATGGCGT-2 5543 24990 6  
Donor3-TGAAAGACAGTAACGG-2 1146 5898 8  
Donor3-TGACAACCAAGCGTAG-2 2740 17186 7  
Donor3-TGACAACCACGTTGGC-2 6802 60176 6  
Donor3-TGACGGCAGTCCAGGA-2 1332 4927 7  
Donor3-TGACTTTTCATAGCAC-2 4221 8542 1  
Donor3-TGAGAGGAGCGTAATA-2 1371 4518 8  
Donor3-TGAGAGGTCACGACTA-2 1769 4943 10  
Donor3-TGAGCATAGAGCTTCT-2 1632 5531 9  
Donor3-TGAGCATAGCGTCAAG-2 2950 6275 3  
Donor3-TGAGCATCAAGCCGCT-2 2192 4125 6  
Donor3-TGAGCATCACAAGTAA-2 4401 11903 4  
Donor3-TGAGCCGAGAGGGATA-2 4079 12856 1  
Donor3-TGAGCCGGTCGACTGC-2 9456 78364 5  
Donor3-TGAGGGACAATCCGAT-2 1124 4422 8  
Donor3-TGAGGGAGTGACTION-2 1906 4260 5  
Donor3-TGATTTTCAGAGGACGG-2 1554 5172 7  
Donor3-TGATTTCTCAGTCCCT-2 3276 7235 3  
Donor3-TGATTTCTCGGACAAG-2 1087 5874 8  
Donor3-TGCCAAAAGCACAGGT-2 3297 7742 1  
Donor3-TGCCAAACAGCATGAG-2 2563 5850 4  
Donor3-TGCCAAAGTGGCAAAC-2 3006 6711 3  
Donor3-TGCCCATCAATGTTGC-2 1184 5205 8  
Donor3-TGCCCTAAGCGATTCT-2 1599 4856 13  
Donor3-TGCCCTACATTAGCCA-2 6258 48670 6  
Donor3-TGCCCTATCAGCTCGG-2 1871 11848 8  
Donor3-TGCCCTATCATATCGG-2 1341 6346 7  
Donor3-TGCCCTATCGCCAAAT-2 1557 4620 13  
Donor3-TGCGCAGCACTTCGAA-2 2649 5977 3  
Donor3-TGCGCAGGTGATGATA-2 1798 5008 13  
Donor3-TGCGCAGTCCCATTAT-2 2178 4319 6

Donor3-TGCGGGTAGCGAGAAA-2 2527 5512 2  
Donor3-TGCGGGTCATCTACGA-2 4001 11466 6  
Donor3-TGCGTGGAGCGATCCC-2 1140 5590 8  
Donor3-TGCGTGGAGGCAGTCA-2 1722 9399 8  
Donor3-TGCGTGGCACCACGTG-2 2522 4420 5  
Donor3-TGCGTGGCATTGCCC-2 1501 6609 7  
Donor3-TGCTACCAGACACGAC-2 2805 8609 10  
Donor3-TGCTACCGTTCTCATT-2 6687 30000 6  
Donor3-TGCTACCTCCTTTCGG-2 1048 5016 8  
Donor3-TGCTGCTAGCACAGGT-2 1429 5862 8  
Donor3-TGCTGCTAGCCACGCT-2 4495 15444 5  
Donor3-TGGACGCCATGCAATC-2 3089 6905 3  
Donor3-TGGACGCTCATCTGCC-2 1477 8896 8  
Donor3-TGGCGCATCATGCAAC-2 1376 7245 8  
Donor3-TGGCGCATCTTACCTA-2 3528 19169 7  
Donor3-TGGCTGGAGCCCAGCT-2 1068 4674 8  
Donor3-TGGCTGGAGCCCGAAA-2 1264 4210 7  
Donor3-TGGCTGGTCCATGAAC-2 1948 9148 7  
Donor3-TGGGCGTAGAAACGCC-2 2989 16381 7  
Donor3-TGGGCGTTCTAAGCCA-2 1562 8009 8  
Donor3-TGGTTAGCACTGCCAG-2 5627 19832 5  
Donor3-TGGTTAGTCCTTTCGG-2 1903 5493 6  
Donor3-TGGTTCCCAATCAGAA-2 5337 18797 6  
Donor3-TGGTTCCAGCCACCA-2 2302 11545 7  
Donor3-TGTATTCAGAAGCCCA-2 1434 4229 13  
Donor3-TGTATTCAGAAGGTTT-2 2572 6326 4  
Donor3-TGTATTCAGAGACTTA-2 1771 9413 7  
Donor3-TGTATTCAGTATCGAA-2 2702 6004 6  
Donor3-TGTATTCAGTTCGATC-2 1585 4272 8  
Donor3-TGTATTCCAAAGCGGT-2 3317 7710 6  
Donor3-TGTATTCCAGGGCATA-2 2914 15957 7  
Donor3-TGTATTCTCATGTCCC-2 1947 11215 7  
Donor3-TGTCCCAAGGGATCTG-2 3739 16933 6  
Donor3-TGTCCAGTCACACGC-2 2454 5691 6  
Donor3-TGTGGTACAAATTGCC-2 1774 10649 8  
Donor3-TGTGGTACAATGCCAT-2 1923 7717 7  
Donor3-TGTGGTAGTCAAAGCG-2 4675 14693 6  
Donor3-TGTGTTTAGTGCCAGA-2 4744 17399 6  
Donor3-TGTTCCGAGCCCAACC-2 1740 5935 9  
Donor3-TGTTCCGTCGAACTGT-2 1536 6559 7  
Donor3-TGTTCCGTCGACGGAA-2 1855 5388 10  
Donor3-TTAACTCAGTGTTTGC-2 1415 5759 8  
Donor3-TTAACTCAGTTCGCGC-2 6118 24942 5  
Donor3-TTAACTCGTCAGCTAT-2 4251 25932 7  
Donor3-TTAGGACGTGATGATA-2 2375 7780 10  
Donor3-TTAGGACTCACTTATC-2 5054 15773 2  
Donor3-TTAGGCATCCTTTACA-2 7056 46612 4  
Donor3-TTAGTTCCAGCGTAAG-2 1567 4142 13  
Donor3-TTAGTTTCGTGCAACAG-2 1191 5689 8  
Donor3-TTAGTTTCGTCTCGTTC-2 2198 5733 6  
Donor3-TTATGCTGTTTCGTTGA-2 1318 6488 8  
Donor3-TTATGCTTCATGTCCC-2 3764 18983 6  
Donor3-TTCCCAGAGAGTACCG-2 1642 4912 13  
Donor3-TTCCCAGGTAGTGAAT-2 1761 4436 10  
Donor3-TTCGGTCCATTCCCTGC-2 3172 16432 7  
Donor3-TTCGGTTCGTCAGTGA-2 1082 5140 8

Donor3-TTCGGTCTCTCCACT-2 3533 8545 3  
Donor3-TTCGGTCTCCGCATCT-2 7742 52125 6  
Donor3-TTCTACAAGTATCGAA-2 3765 9859 3  
Donor3-TTCTACACAATCGGTT-2 3030 12713 6  
Donor3-TTCTCAAAGTCAATAG-2 2941 8324 4  
Donor3-TTCTCAACAAGGACAC-2 4212 24735 6  
Donor3-TTCTCCTAGATATGGT-2 1810 5321 13  
Donor3-TTCTCCTAGGCGACAT-2 3202 19690 7  
Donor3-TTCTCCTTCACTCCTG-2 5153 43422 7  
Donor3-TTCTCCTTCCGAACGC-2 5282 16885 3  
Donor3-TTCTCCTTCTCTGTCG-2 7053 36249 6  
Donor3-TTCTTAGGTAATTGGA-2 2199 11254 7  
Donor3-TTCTTAGGTCGAGATG-2 3427 11916 10  
Donor3-TTGACTTAGTTCCACA-2 3626 7763 6  
Donor3-TTGCCGTAGCTGAACG-2 1826 5046 10  
Donor3-TTGCCGTCACGAGGTA-2 2437 7681 13  
Donor3-TTGCCGTCAGACACTT-2 2593 11361 7  
Donor3-TTGCGTCAGCGTGAGT-2 1037 5419 8  
Donor3-TTGAACCAATGTTGC-2 5306 18138 3  
Donor3-TTGAACCACCGAAAG-2 7622 45145 6  
Donor3-TTGAACGTTATCGGT-2 1290 4297 13  
Donor3-TTGAACTCCAAATGC-2 4978 14842 6  
Donor3-TTGAACTCTTGCATT-2 1147 5548 8  
Donor3-TTGCAAAGGGAAACA-2 1752 5050 12  
Donor3-TTGCAACACATCTTT-2 1143 5541 8  
Donor3-TTGCAATCACGAAGG-2 2518 11501 7  
Donor3-TTGCAATCCCGGATG-2 5505 17212 2  
Donor3-TTGCAATCTGAAAGA-2 1691 5236 13  
Donor3-TTGCAATCTTCGAGA-2 2058 16191 8  
Donor3-TTGTAGGAGACAAAGG-2 1456 8311 8  
Donor3-TTGTAGGAGCTCTCGG-2 2101 7619 9  
Donor3-TTGTAGGCAGTATGCT-2 2150 4957 5  
Donor3-TTACTGAGCTCCTTC-2 2377 11672 7  
Donor3-TTACTGCAGGTCTCG-2 4144 19565 6  
Donor3-TTTATGCCATATGAGA-2 4399 12977 6  
Donor3-TTTATGCGTGTGTGCC-2 2764 5514 3  
Donor3-TTTCCTCGTGCCTTA-2 3534 8733 3  
Donor3-TTTCCTCTCAAACCAC-2 1082 4467 8  
Donor3-TTTCCTCTCCCTTGCA-2 4152 20094 5  
Donor3-TTTGCGCCACGGCTAC-2 6110 24350 4  
Donor3-TTTGCGCGTAGGCATG-2 4690 14982 4  
Donor3-TTTGCGCGTCCACTC-2 3317 7642 6  
Donor3-TTTGGTTAGGGTGTGT-2 5773 20964 5  
Donor3-TTTGGTTAGTGAACGC-2 3801 10178 1  
Donor1-AAACCTGAGAAACCTA-1 4078 10563 3  
Donor1-AAACCTGAGAAAGTGG-1 2191 7587 10  
Donor1-AAACGGGAGGTTCCCTA-1 5032 25297 6  
Donor1-AAACGGGCACTGTGTA-1 3282 7254 4  
Donor1-AAACGGGGTGAACCTT-1 1126 2980 9  
Donor1-AAAGATGAGGACACCA-1 1330 3130 13  
Donor1-AAAGATGCATTGCGGC-1 1861 5201 10  
Donor1-AAAGATGCATTGGGCC-1 1777 4349 13  
Donor1-AAAGATGTCAAGATCC-1 3081 6653 6  
Donor1-AAAGCAATCTCGGACG-1 6710 33040 6  
Donor1-AAAGTAGCATGTCCTC-1 2398 8321 9  
Donor1-AAATGCCATTGTGCA-1 3342 11500 11

Donor1-AACACGTAGTCGCCGT-1 3188 7060 2  
Donor1-AACACGTCATTCCTCG-1 1537 5531 8  
Donor1-AACACGTGTCCATGAT-1 2814 5328 6  
Donor1-AACCATGAGGAGTACC-1 1351 4203 13  
Donor1-AACCATGAGGCGACAT-1 2678 5950 3  
Donor1-AACCATGCATGGGACA-1 970 3234 8  
Donor1-AACCATGGTAAGGGAA-1 1352 5312 8  
Donor1-AACCGCGTCCCAAGAT-1 2562 8900 10  
Donor1-AACCGCGTCGCTTAGA-1 1219 3006 7  
Donor1-AACGTTGAGAAACCAT-1 2961 7040 3  
Donor1-AACGTTGCAACACCCG-1 2212 5976 11  
Donor1-AACTCAGGTGACCAAG-1 5067 28337 10  
Donor1-AACTCCCCAACTGCTA-1 2371 8409 9  
Donor1-AACTCCCCACTCTGTC-1 5443 18249 2  
Donor1-AACTCCCGTACCGGCT-1 3237 7714 3  
Donor1-AACTCTTAGGAATCGC-1 1429 3093 11  
Donor1-AACTCTTCACCGTTGG-1 1980 4428 6  
Donor1-AACTCTTGTCTACCTC-1 4772 19399 6  
Donor1-AACTCTTGTGATAAGT-1 2676 5714 3  
Donor1-AACTGGTCATTGGCGC-1 2727 11666 10  
Donor1-AACTGGTGTATAGTAG-1 2483 7578 11  
Donor1-AACTTTCAGGACGTA-1 1254 4070 8  
Donor1-AAGACCTAGAATGTTG-1 6483 30106 5  
Donor1-AAGACCTAGGTTACCT-1 2095 10619 8  
Donor1-AAGCCGCAGTAGGTGC-1 2718 8554 6  
Donor1-AAGCCGCAGTATCGAA-1 1542 5206 13  
Donor1-AAGGAGCGTAAGAGGA-1 1772 4468 10  
Donor1-AAGGCAGCACACATGT-1 2328 8610 10  
Donor1-AAGGCAGCACGGACAA-1 2730 5896 3  
Donor1-AAGGCAGCACTTAAGC-1 2765 15220 7  
Donor1-AAGGCAGTCCCGGATG-1 1876 3317 4  
Donor1-AAGGTTTCAGACCGGAT-1 3267 7716 2  
Donor1-AAGGTTTCAGGAGTCTG-1 2851 5618 2  
Donor1-AAGGTTCTCAAACCGT-1 1234 3108 13  
Donor1-AAGTCTGAGAGCTATA-1 1690 5074 10  
Donor1-AAGTCTGCACCTATCC-1 1405 3829 13  
Donor1-AAGTCTGGTTGCGTTA-1 4485 12493 4  
Donor1-AATCCAGGTAAATGAC-1 1460 3251 11  
Donor1-AATCCAGTCTCGGACG-1 4894 14365 2  
Donor1-AATCGGTCATCGATGT-1 1146 3606 8  
Donor1-AATCGGTTCCAGAAGG-1 2113 5336 6  
Donor1-ACACCAAAGAAACCGC-1 2066 4858 13  
Donor1-ACACCAATCCGATATG-1 1276 2845 11  
Donor1-ACACCCTAGTTGTAGA-1 2811 5900 3  
Donor1-ACACCCTCAGATCGGA-1 1688 4340 10  
Donor1-ACACCCTGTACATCCA-1 1927 3448 3  
Donor1-ACACCCTGTACTCGCG-1 1668 3719 11  
Donor1-ACACCCTTCAATCACG-1 3534 10008 6  
Donor1-ACACCGGAGAAACCTA-1 5133 15932 1  
Donor1-ACACCGGAGAACTCGG-1 2271 4589 2  
Donor1-ACACTGACACCGTTGG-1 1665 5376 9  
Donor1-ACAGCCGCAGCGAACA-1 2322 8455 6  
Donor1-ACAGCCGGTACCGTTA-1 5911 27184 4  
Donor1-ACAGCCGGTCCGGCA-1 1616 4264 12  
Donor1-ACAGCTACAGTGGGAT-1 2486 7979 10  
Donor1-ACAGCTAGTCCCTACT-1 2007 5148 8

Donor1-ACAGCTAGTGTGCCTG-1 3055 6977 2  
Donor1-ACAGCTAGTTCCACGG-1 1313 4151 9  
Donor1-ACATACGAGCAGCCTC-1 1558 4445 9  
Donor1-ACATACGCAAATACAG-1 2024 5845 9  
Donor1-ACATACGGTAGATTAG-1 1031 2944 9  
Donor1-ACATCAGGTTAGGGTG-1 3927 12638 6  
Donor1-ACCGTAAAGTTAAGAAC-1 3303 7817 3  
Donor1-ACCGTAAATCCCAACGG-1 1870 6156 13  
Donor1-ACCTTTATCGTTGCCT-1 1755 5745 9  
Donor1-ACGAGCCTCAGTTTGG-1 1341 3454 13  
Donor1-ACGAGGATCATCGGAT-1 4110 10345 2  
Donor1-ACGATACGTGCATCTA-1 7542 38740 5  
Donor1-ACGATGTAGGGTATCG-1 2577 8460 11  
Donor1-ACGATGTTACCCGAG-1 3896 9560 1  
Donor1-ACGCAGCTCATGTCTT-1 1400 3904 13  
Donor1-ACGCCAGCAAGTCTGT-1 2619 10190 10  
Donor1-ACGCCGATCCTTGGTC-1 3058 6933 3  
Donor1-ACGGAGATCCAAAGTC-1 2677 7353 11  
Donor1-ACGGAGATCGCTTAGA-1 3382 8208 3  
Donor1-ACGGAGATCGTCCGTT-1 3785 9077 2  
Donor1-ACGGCCAAGGGCACTA-1 3057 10114 11  
Donor1-ACGGCCACAGGTGCCT-1 2217 5552 11  
Donor1-ACGGGCTAGAGTAATC-1 3162 7655 1  
Donor1-ACGGGCTCAGAGCCAA-1 3448 8233 6  
Donor1-ACGGGCTCAGCCAGAA-1 1360 3783 13  
Donor1-ACGGGCTCATGCTAGT-1 1665 4079 6  
Donor1-ACGGGCTGTTTCGTGAT-1 3997 10225 5  
Donor1-ACGGGCTTCGACAGCC-1 2472 6921 13  
Donor1-ACGGGCTTCTCCCTGA-1 1369 3653 13  
Donor1-ACGGGTCCAAGCCCAC-1 2454 11513 7  
Donor1-ACGGGTCCAATGGAAT-1 1105 3564 8  
Donor1-ACGGGTCCACTGTCGG-1 3532 8918 3  
Donor1-ACGGGTCTCATCATTC-1 1288 3944 7  
Donor1-ACGGGTCTCGTCTGAA-1 2198 4378 5  
Donor1-ACTATCTGTTACGGC-1 1591 3770 11  
Donor1-ACTGAACAGATGGGTC-1 5951 19850 1  
Donor1-ACTGAACGTAAGGATT-1 1556 5172 9  
Donor1-ACTGAACGTCATACTG-1 1477 4321 13  
Donor1-ACTGAACGTCGCTTTC-1 3212 7973 3  
Donor1-ACTGAACGTGTCGCTG-1 3987 9689 3  
Donor1-ACTGAGTGTGTGGCTC-1 3291 11377 11  
Donor1-ACTGCTCCATGTAGTC-1 5840 20558 1  
Donor1-ACTGCTCGTATTCTGTG-1 2041 3923 2  
Donor1-ACTGCTCTCGCATGAT-1 1858 3480 3  
Donor1-ACTGTCCAGATTACCC-1 3417 7979 3  
Donor1-ACTGTCCCACCTTGTC-1 4497 13374 6  
Donor1-ACTGTCCCCTGCCAG-1 2413 8594 10  
Donor1-ACTGTCCCATACTCTT-1 2070 6078 13  
Donor1-ACTGTCCCTCGCGCAA-1 1435 3438 13  
Donor1-ACTTTCAAGGACGAAA-1 4621 15017 9  
Donor1-ACTTTCAAGTACGACG-1 1206 3656 7  
Donor1-ACTTTCAAGTATTGGA-1 2108 5847 10  
Donor1-ACTTTCAGTTGCTCCT-1 5568 16205 2  
Donor1-ACTTTCATCTTCTGGC-1 2858 6924 6  
Donor1-AGAATAGAGTGGTAAT-1 3714 17217 10  
Donor1-AGAATAGGTCTTCGTC-1 3881 35773 8

Donor1-AGACGTTAGGACCACA-1 4764 15556 6  
Donor1-AGACGTTAGGCATGGT-1 2001 5458 10  
Donor1-AGACGTTGTCCGAAGA-1 1210 2980 7  
Donor1-AGACGTTTCATTTGGG-1 3305 7176 1  
Donor1-AGAGCGAAGCAGACTG-1 1590 6713 9  
Donor1-AGAGCGAAGTCGTAAT-1 1288 2940 11  
Donor1-AGAGCGACACAACGCC-1 3828 9849 2  
Donor1-AGAGCTTAGTGGGATC-1 2190 6240 6  
Donor1-AGAGCTTCACGACGAA-1 1662 3813 10  
Donor1-AGAGCTTGTCGGGTCT-1 3973 10397 2  
Donor1-AGAGCTTTCTTGTATC-1 980 3631 8  
Donor1-AGATCTGGTTACTGAC-1 1208 4315 8  
Donor1-AGATCTGTCTCCAACC-1 2919 5754 5  
Donor1-AGCAGCCAGACAGGCT-1 1558 3465 8  
Donor1-AGCAGCCATCACGAT-1 4217 10811 3  
Donor1-AGCAGCTCCCTCTTT-1 4788 17136 10  
Donor1-AGCATAACAGAGTGACC-1 1584 3772 11  
Donor1-AGCATAACAGCCTTTC-1 2954 6359 3  
Donor1-AGCATACTCGCGAC-1 1604 3614 11  
Donor1-AGCCTAACAACTGTC-1 9112 90976 6  
Donor1-AGCGTATAGAGTAAGG-1 2532 16775 8  
Donor1-AGCGTATAGGCTCAGA-1 1713 4468 10  
Donor1-AGCGTATCACATTCGA-1 7187 29696 1  
Donor1-AGCGTATGTCGTCTTC-1 1412 3158 13  
Donor1-AGCGTATTCGTCATC-1 1964 10304 8  
Donor1-AGCGTCGAGCCGCCTA-1 2231 6111 11  
Donor1-AGCGTCGAGTATCTCG-1 1503 4726 13  
Donor1-AGCGTCGAGTGAACGC-1 1229 3608 8  
Donor1-AGCGTCGAGTTAGCGG-1 1105 3227 13  
Donor1-AGCGTCGCACTCGACG-1 2356 6643 11  
Donor1-AGCGTCGGTGAGGGTT-1 2471 13179 7  
Donor1-AGCTCCTCAAAGGTGC-1 2034 7128 7  
Donor1-AGCTCCTGTGCAACGA-1 4431 13468 4  
Donor1-AGCTCCTTCCTTAATC-1 4262 10909 2  
Donor1-AGCTCTCCAATGGTCT-1 3734 8163 5  
Donor1-AGCTTGAAGCCATCGC-1 1076 3233 13  
Donor1-AGCTTGATCGTCGTTC-1 2242 6579 11  
Donor1-AGGCCACCATGACGGA-1 1547 4269 9  
Donor1-AGGCCGTAGAGTTGGC-1 1922 5133 11  
Donor1-AGGCCGTTCCCTTGTG-1 5574 18028 2  
Donor1-AGGGAGTCATGCTAGT-1 3073 6514 3  
Donor1-AGGGAGTCATTGGGCC-1 1307 2969 10  
Donor1-AGGGAGTTCAAACGGG-1 1737 4363 11  
Donor1-AGGGATGAGGGCTTGA-1 5256 18399 2  
Donor1-AGGGATGCATTCTCAT-1 2328 9012 7  
Donor1-AGGGATGGTCTCTTAT-1 1812 8598 8  
Donor1-AGGGATGGTGGTGTAG-1 1472 2874 11  
Donor1-AGGGATGGTGTGCTG-1 2106 4442 2  
Donor1-AGGGTGAAGATATGCA-1 3309 7641 2  
Donor1-AGGGTGAGTAAGTAGT-1 2461 6983 13  
Donor1-AGGGTGAGTGCGGTAA-1 2851 6187 3  
Donor1-AGGTCATGTAGGACAC-1 2933 6664 2  
Donor1-AGGTCATTCACCACCT-1 2776 5390 5  
Donor1-AGGTCCGAGGAGTCTG-1 1399 3324 13  
Donor1-AGGTCCGAGGGTTTCT-1 1230 3487 9  
Donor1-AGGTCCGCAGGTGGAT-1 1450 3189 11

|                            |      |       |    |
|----------------------------|------|-------|----|
| Donor1-AGTAGTCCAACAACCT-1  | 4328 | 12801 | 4  |
| Donor1-AGTGGGACACGAAATA-1  | 3074 | 7031  | 3  |
| Donor1-AGTGGGAGTACCGAGA-1  | 3130 | 10465 | 6  |
| Donor1-AGTGGGATCTAACTGG-1  | 2130 | 7529  | 13 |
| Donor1-AGTGTCAAGATGCGAC-1  | 1200 | 3788  | 9  |
| Donor1-AGTTGGTGTAGCCTAT-1  | 2243 | 5394  | 5  |
| Donor1-ATAACGCAGCCAGAAC-1  | 2855 | 5985  | 3  |
| Donor1-ATAACGCTCAGAGACG-1  | 1097 | 3127  | 8  |
| Donor1-ATAAGAGCATCTACGA-1  | 3343 | 11209 | 11 |
| Donor1-ATAAGAGCATGCATGT-1  | 3304 | 8164  | 3  |
| Donor1-ATAAGAGGTGTTTCGAT-1 | 2942 | 6985  | 3  |
| Donor1-ATAAGAGTCTTCATGT-1  | 2788 | 9156  | 11 |
| Donor1-ATAAGAGTCTTGAGAC-1  | 2801 | 5649  | 3  |
| Donor1-ATAGACCAGTTCGATC-1  | 3309 | 8316  | 3  |
| Donor1-ATAGACCGTTAAAGTG-1  | 3206 | 7583  | 3  |
| Donor1-ATCACGATCGACCAGC-1  | 1729 | 6569  | 13 |
| Donor1-ATCATCTAGGATTCGG-1  | 1361 | 3533  | 11 |
| Donor1-ATCATCTCACCGTTGG-1  | 1649 | 4221  | 13 |
| Donor1-ATCATCTGTTGCGCAC-1  | 4251 | 21399 | 10 |
| Donor1-ATCATCTTCGCACTCT-1  | 1123 | 3434  | 8  |
| Donor1-ATCATGGGTTTACTCT-1  | 1467 | 3149  | 11 |
| Donor1-ATCATGGGTTTGACTG-1  | 2130 | 3578  | 6  |
| Donor1-ATCCACCCAACCGCCA-1  | 1576 | 5218  | 13 |
| Donor1-ATCCACCCACATCTTT-1  | 1631 | 4922  | 13 |
| Donor1-ATCCACCCACGAAGCA-1  | 4886 | 15033 | 2  |
| Donor1-ATCGAGTAGGAGTCTG-1  | 1880 | 6164  | 13 |
| Donor1-ATCGAGTCAGGTGCCT-1  | 1282 | 3172  | 13 |
| Donor1-ATCGAGTCAGGTTTCA-1  | 3228 | 7572  | 3  |
| Donor1-ATCGAGTGTTACCGAT-1  | 1743 | 3801  | 11 |
| Donor1-ATGCGATAGGTTCGGAT-1 | 1380 | 3671  | 7  |
| Donor1-ATGCGATGTCGGGTCT-1  | 1151 | 2855  | 7  |
| Donor1-ATGGGAGGTTGGGACA-1  | 2192 | 5880  | 11 |
| Donor1-ATTACTCAGTTAGCGG-1  | 1085 | 2936  | 7  |
| Donor1-ATTACTCCACCAGGTC-1  | 6122 | 20547 | 2  |
| Donor1-ATTACTCGTCCAATA-1   | 4341 | 12316 | 6  |
| Donor1-ATTATCCGTTCGCATCG-1 | 3506 | 7550  | 3  |
| Donor1-ATTCTACAGGTGCACA-1  | 1016 | 3457  | 8  |
| Donor1-ATTGGACAGAGATGAG-1  | 3072 | 6685  | 3  |
| Donor1-ATTGGTGAGACCTAGG-1  | 1867 | 5993  | 13 |
| Donor1-ATTGGTGAGCGATTCT-1  | 3229 | 7809  | 3  |
| Donor1-ATTGGTGAGTTATCGC-1  | 1367 | 3027  | 13 |
| Donor1-ATTGGTGGTCATACTG-1  | 2831 | 9400  | 10 |
| Donor1-ATTGGTGGTTTACTCT-1  | 1243 | 3652  | 8  |
| Donor1-ATTGGTGTTCGGATGGA-1 | 1137 | 3474  | 9  |
| Donor1-ATTTCTGAGAACAACCT-1 | 2055 | 3780  | 2  |
| Donor1-ATTTCTGAGGCTCAGA-1  | 5534 | 19126 | 2  |
| Donor1-ATTTCTGTCCAAAGTC-1  | 2754 | 5768  | 3  |
| Donor1-CAACCAATCAGTTAGC-1  | 1423 | 3170  | 11 |
| Donor1-CAACCAATCTCTTGAT-1  | 2801 | 6277  | 4  |
| Donor1-CAACCTCAGAATGTGT-1  | 1795 | 6757  | 7  |
| Donor1-CAACCTCGTAAGTGTA-1  | 4414 | 21604 | 10 |
| Donor1-CAACTAGGTTTACTCT-1  | 1664 | 3414  | 11 |
| Donor1-CAAGAAAGTCAATGTC-1  | 1736 | 4562  | 10 |
| Donor1-CAAGAAATCCGAATGT-1  | 2697 | 12168 | 10 |
| Donor1-CAAGATCGTAGCTTGT-1  | 3002 | 6837  | 3  |
| Donor1-CAAGTTGCACCTTGTC-1  | 1219 | 4357  | 8  |



Donor1-CAAGTTGTCACAAACC-1 1595 4823 7  
Donor1-CACAAACGTACACACGC-1 1108 3140 8  
Donor1-CACAAACGTGCAGACA-1 2632 5211 5  
Donor1-CACACAAAGGAGTCTG-1 6109 22119 5  
Donor1-CACACCTGTCTGCAAT-1 2028 4334 13  
Donor1-CACACCTGTTACGACT-1 1974 10984 8  
Donor1-CACACCTTCAGCGACC-1 1107 2995 7  
Donor1-CACACTCCAAGGTGTG-1 2334 6396 10  
Donor1-CACAGGCCAAGTCATC-1 1308 4917 8  
Donor1-CACAGTATCTCAAACG-1 1511 3396 11  
Donor1-CACATTTAGCAAATCA-1 1937 5303 13  
Donor1-CACATTTGTAGGCTGA-1 3045 7142 3  
Donor1-CACCACTTCTGCTGCT-1 3537 7933 3  
Donor1-CACCAGGGTCCGAAGA-1 2245 7180 9  
Donor1-CACCAGGTCCTGTAGA-1 2574 5275 3  
Donor1-CACCTTGAGAGATGAG-1 2286 10035 8  
Donor1-CACCTTGAGTAATCCC-1 4672 25836 10  
Donor1-CACCTTGCAGGACCCT-1 1937 5865 13  
Donor1-CACCTTGTCTATCCCG-1 4430 12324 6  
Donor1-CACTCCACATTAACCG-1 3653 8284 3  
Donor1-CACTCCATCCTTTCTC-1 1429 4058 7  
Donor1-CAGAATCAGCTGCAAG-1 1461 4212 13  
Donor1-CAGAATCCATCCTAGA-1 2256 6704 13  
Donor1-CAGAATCTCCAACCAA-1 1154 4050 8  
Donor1-CAGATCACAAATGGAAT-1 1794 4386 10  
Donor1-CAGCAGCAGGTCATCT-1 2000 7141 9  
Donor1-CAGCAGCGTATTCTCT-1 2947 6125 2  
Donor1-CAGCATAAGACTTTTCG-1 1237 3493 7  
Donor1-CAGCATAGTTAAAGTG-1 2183 6120 10  
Donor1-CAGCATATCATAAAGG-1 1245 2854 8  
Donor1-CAGCGACAGACTTGAA-1 2080 3931 3  
Donor1-CAGCTAAAGCGATCCC-1 2961 6894 3  
Donor1-CAGCTAACACCATCCT-1 2801 10999 10  
Donor1-CAGCTAAGTCTGATTG-1 1059 3685 8  
Donor1-CAGCTAAGTTCGCGAC-1 3525 8118 3  
Donor1-CAGCTAAGTTTCGCTC-1 1535 5528 13  
Donor1-CAGCTAATCAAACAAG-1 5557 17617 1  
Donor1-CAGCTAATCAGCTGGC-1 1573 2905 6  
Donor1-CAGCTGGCATGGATGG-1 2116 3396 5  
Donor1-CAGTAACAGAGAGCTC-1 2206 8113 9  
Donor1-CAGTAACAGGATGCGT-1 1551 7499 8  
Donor1-CAGTAACAGTGGGATC-1 1277 3038 10  
Donor1-CAGTAACCAGGTCGTC-1 1296 4772 8  
Donor1-CAGTAACCATGTCTCC-1 2556 8998 9  
Donor1-CAGTCCTAGACGCTTT-1 1875 6020 13  
Donor1-CAGTCCTTCACGCGGT-1 1299 3256 6  
Donor1-CATATGGGTGCTCTTC-1 5381 16573 1  
Donor1-CATATTCTGTAGCACGA-1 2239 8917 7  
Donor1-CATATTCTCCTATGTT-1 950 3196 8  
Donor1-CATCAAGCATTTTCAGG-1 1357 3908 12  
Donor1-CATCAGACACGCTTTC-1 2179 3734 5  
Donor1-CATCAGAGTGGTACAG-1 1179 4519 8  
Donor1-CATCAGATCTCGTATT-1 4902 22081 10  
Donor1-CATCCACCATAACAGCT-1 1638 5062 7  
Donor1-CATCCACGTGACGGTA-1 1918 3186 2  
Donor1-CATCGAACATGTCCTC-1 1537 5097 9

|                             |      |       |    |
|-----------------------------|------|-------|----|
| Donor1-CATCGAAGTCTACCTC-1   | 8980 | 47163 | 1  |
| Donor1-CATCGGGCATATGGTC-1   | 1708 | 4175  | 10 |
| Donor1-CATCGGGGTACCGTTA-1   | 2046 | 5407  | 10 |
| Donor1-CATGACACAAACGTGG-1   | 2889 | 6506  | 3  |
| Donor1-CATGCCTCAGCTGCAC-1   | 2083 | 6792  | 10 |
| Donor1-CATGCCTGTCAGGACA-1   | 1915 | 3113  | 5  |
| Donor1-CATGGCGAGTGATCGG-1   | 1653 | 5734  | 7  |
| Donor1-CATTATCCATGGTCAT-1   | 1934 | 9105  | 8  |
| Donor1-CATTATCTCCTGCTTG-1   | 2674 | 5507  | 3  |
| Donor1-CATTTCGCCACCCTATC-1  | 1538 | 5658  | 13 |
| Donor1-CATTTCGCCATTCTTAC-1  | 3363 | 7862  | 3  |
| Donor1-CCAATCCAGAATCTCC-1   | 1457 | 5146  | 7  |
| Donor1-CCAATCCCAATAGCAA-1   | 983  | 3186  | 8  |
| Donor1-CCAATCCCACGGTAGA-1   | 1316 | 3305  | 11 |
| Donor1-CCAATCCGTGTTCTTT-1   | 2493 | 7012  | 6  |
| Donor1-CCAATCCTCCACGTTC-1   | 2039 | 6239  | 13 |
| Donor1-CCACCTACAGCTCCGA-1   | 3191 | 10324 | 10 |
| Donor1-CCACCTAGTGCTGTAT-1   | 4696 | 13739 | 2  |
| Donor1-CCACGGAAGCTCCTCT-1   | 7281 | 31751 | 2  |
| Donor1-CCAGCGACAGCTGTGC-1   | 2645 | 4971  | 1  |
| Donor1-CCAGCGATCAACTCTT-1   | 2664 | 8486  | 9  |
| Donor1-CCAGCGATCAATCACG-1   | 4089 | 10852 | 2  |
| Donor1-CCATGTCAGAAACCAT-1   | 2143 | 7741  | 9  |
| Donor1-CCATTCGTCGATCCCT-1   | 2269 | 9208  | 13 |
| Donor1-CCCAATCGTAGCCTAT-1   | 3393 | 14144 | 10 |
| Donor1-CCCAATCGTGTGACGA-1   | 6347 | 22713 | 1  |
| Donor1-CCCAATCTCCAGGGCT-1   | 1862 | 5172  | 11 |
| Donor1-CCCAATCTCTGTCAAG-1   | 1915 | 6397  | 13 |
| Donor1-CCCATACGTTCCACTC-1   | 1596 | 4330  | 9  |
| Donor1-CCGGGATAGGCTAGCA-1   | 3885 | 9501  | 3  |
| Donor1-CCGGGATCAGCAGTTT-1   | 3121 | 7309  | 3  |
| Donor1-CCGGGATTCCTCGCAT-1   | 3447 | 8417  | 3  |
| Donor1-CCGGTAGAGCCCAACC-1   | 4896 | 17811 | 10 |
| Donor1-CCGGTAGCATCTACGA-1   | 6571 | 32039 | 6  |
| Donor1-CCGGTAGGTTCTCATT-1   | 3533 | 7379  | 2  |
| Donor1-CCGTACTAGGTAGCTG-1   | 3346 | 11612 | 10 |
| Donor1-CCGTACTCAACTGCTA-1   | 3711 | 9192  | 3  |
| Donor1-CCGTGGAGTCTAGCCG-1   | 1637 | 4906  | 10 |
| Donor1-CCGTTACACAGCATGAG-1  | 1701 | 7507  | 8  |
| Donor1-CCGTTCAGTTTGTGG-1    | 2596 | 7939  | 10 |
| Donor1-CCTAAAGCACCTCGTT-1   | 1631 | 4803  | 13 |
| Donor1-CCTAAAGCAGCTGCTG-1   | 1561 | 3550  | 11 |
| Donor1-CCTACACAGCGCCTCA-1   | 1687 | 4225  | 10 |
| Donor1-CCTACACGTATAGGTA-1   | 3561 | 8103  | 5  |
| Donor1-CCTACACGTCACACGC-1   | 1182 | 2839  | 11 |
| Donor1-CCTACCACAGGGTTAG-1   | 1523 | 2828  | 4  |
| Donor1-CCTACCAGTACCCAAT-1   | 3523 | 8919  | 3  |
| Donor1-CCTACCAGTCCCTACT-1   | 2641 | 5578  | 3  |
| Donor1-CCTATTACACAACACTGT-1 | 1344 | 4281  | 8  |
| Donor1-CCTCAGTCAAACACTGCT-1 | 4639 | 12553 | 5  |
| Donor1-CCTCAGTTCTCTAGGA-1   | 3255 | 7949  | 3  |
| Donor1-CCTCTGAGTGGGTATG-1   | 3554 | 8897  | 3  |
| Donor1-CCTCTGAGTTTGCATG-1   | 1340 | 3960  | 13 |
| Donor1-CCTTACGGTGCAACGA-1   | 1609 | 6917  | 8  |
| Donor1-CCTTACGGTGCAAGTAG-1  | 3037 | 6033  | 5  |
| Donor1-CCTTCCCAGATCCCGC-1   | 2977 | 9596  | 11 |

Donor1-CCTTCCCGTCTCTCGT-1 1727 4136 13  
Donor1-CCTTCGAGTGCCTGTG-1 4796 14033 5  
Donor1-CCTTCGAGTGTAAGTA-1 1503 3640 10  
Donor1-CGAACATCATTGCCCC-1 1566 5186 7  
Donor1-CGAATGTAGAGTGACC-1 2736 5850 3  
Donor1-CGAATGTAGTACACCT-1 2572 4730 3  
Donor1-CGAATGTCACTTGGAT-1 1819 7521 7  
Donor1-CGACCTTAGTGTACCT-1 1607 4540 9  
Donor1-CGACCTTCACTGCCAG-1 1318 3110 13  
Donor1-CGACCTTCATATGGTC-1 2980 6446 3  
Donor1-CGACCTTGTGCATCTA-1 1810 4271 11  
Donor1-CGACTTCCAGCTGGCT-1 4548 13174 4  
Donor1-CGACTTCCATAGTAAG-1 1097 3192 8  
Donor1-CGACTTCTCCACGTGG-1 940 3044 8  
Donor1-CGACTTCTTGTGTTG-1 1964 5975 13  
Donor1-CGAGAAGGTAAATGAC-1 932 2846 8  
Donor1-CGAGCACCAGCTGCTG-1 2555 10499 9  
Donor1-CGAGCACTCCTATTCA-1 1612 5216 9  
Donor1-CGAGCCACAAGCGATG-1 3230 8081 3  
Donor1-CGAGCCACACCGTTGG-1 1778 4642 13  
Donor1-CGAGCCACAGGTGGAT-1 1844 4669 11  
Donor1-CGAGCCAGTAATCGTC-1 2526 7912 11  
Donor1-CGATCGGAGCCGGTAA-1 1799 4885 11  
Donor1-CGATCGGTCTACTCAT-1 1192 2993 13  
Donor1-CGATGTAAGAGACTTA-1 3083 9807 10  
Donor1-CGATTGAGTCTTCTCG-1 3989 14093 10  
Donor1-CGCCAAGAGTATTGGA-1 2046 5254 10  
Donor1-CGCCAAGGTGATGTGG-1 1890 4872 11  
Donor1-CGCGTTTTCTCTTATG-1 5568 25200 10  
Donor1-CGCTATCAGCCCTAAT-1 3493 12293 11  
Donor1-CGCTATCTCCTATGTT-1 1350 2914 11  
Donor1-CGCTATCTCTTACCTA-1 2400 7930 10  
Donor1-CGCTGGACATAAGACA-1 1816 5975 13  
Donor1-CGCTTCAGTAAGGGAA-1 1906 7062 7  
Donor1-CGCTTCATCTAACTGG-1 1316 3721 8  
Donor1-CGGACACCAGACAGGT-1 2301 6968 10  
Donor1-CGGACACTCAGCAACT-1 1258 4240 8  
Donor1-CGGACGTCACCAACCG-1 5757 37781 10  
Donor1-CGGAGCTCATACAGCT-1 4016 16196 10  
Donor1-CGGAGCTGTATCTGCA-1 2895 5735 2  
Donor1-CGGAGTCAGAGCTGGT-1 2294 12534 8  
Donor1-CGGAGTCGTCCCTTGT-1 2107 4058 3  
Donor1-CGGAGTCTCCTTGGTC-1 3707 9385 3  
Donor1-CGGCTAGCAGGGCATA-1 1522 5146 13  
Donor1-CGGCTAGTCCTAGAAC-1 1536 6303 8  
Donor1-CGGGTCAGTCTAGTCA-1 2406 4881 4  
Donor1-CGGTTAACAAGGACAC-1 4348 10952 5  
Donor1-CGGTTAACAGATGGGT-1 1775 5510 9  
Donor1-CGTAGCGAGAAGGGTA-1 1605 3330 11  
Donor1-CGTAGCGAGTGAACAT-1 1724 4464 11  
Donor1-CGTAGCGCAGCTGTTA-1 1536 2892 2  
Donor1-CGTAGCGGTAATCACC-1 5791 17399 2  
Donor1-CGTAGCGGTAGAGGAA-1 1641 3833 11  
Donor1-CGTAGCGGTCCAGTAT-1 969 2887 8  
Donor1-CGTAGCGGTGTTGGGA-1 3666 15282 10  
Donor1-CGTAGCGTCCAGAGGA-1 1166 4202 9

Donor1-CGTAGCGTCCTCAACC-1 2084 5985 10  
Donor1-CGTAGGCAGGCTAGGT-1 2637 10027 10  
Donor1-CGTAGGCGTTTGTGTG-1 1670 4099 10  
Donor1-CGTAGGCTCACTTATC-1 3473 8084 3  
Donor1-CGTAGGCTCTAACTCT-1 1449 5955 8  
Donor1-CGTCACTCAAACGCGA-1 2617 5770 3  
Donor1-CGTCAGGTCGCTTGTC-1 3414 12396 12  
Donor1-CGTCTACAGGCCGAAT-1 2510 4769 2  
Donor1-CGTCTACCAGCCTTGG-1 1590 6517 7  
Donor1-CGTCTACGTCCGCTGA-1 1472 4304 9  
Donor1-CGTGAGCGTTACGGAG-1 2466 6739 11  
Donor1-CGTGTCTGTTCTGGTA-1 1333 4118 9  
Donor1-CGTGTCTTCAGCGACC-1 2804 6231 3  
Donor1-CGTTAGAAGCATGGCA-1 3000 5933 5  
Donor1-CGTTCTGGTAGCAAAT-1 3658 8709 3  
Donor1-CGTTCTGTCATGTCTT-1 1568 5616 8  
Donor1-CGTTGGGAGGGTGTGT-1 1896 6227 9  
Donor1-CGTTGGGCAATCAGAA-1 3297 12085 11  
Donor1-CGTTGGGCACTCAGGC-1 4219 11894 3  
Donor1-CGTTGGGTCACAGGTG-1 1264 3070 13  
Donor1-CTAACTTGTCGTCTTC-1 3372 7828 2  
Donor1-CTAAGACCACAGTCGC-1 1801 3215 5  
Donor1-CTAAGACGTCAAAGCG-1 2531 5605 3  
Donor1-CTAAGACGTTTCCACC-1 1763 4948 9  
Donor1-CTAAGACTCATCTGTT-1 2004 6519 9  
Donor1-CTAATGGCAATGGATA-1 2008 6861 9  
Donor1-CTAATGGGTGTCAATC-1 1599 4456 10  
Donor1-CTAATGGTCACCCTCA-1 1387 2893 13  
Donor1-CTACACCAGACGCTTT-1 1370 3746 8  
Donor1-CTACATTCAGTACACT-1 3887 9111 2  
Donor1-CTACATTCATGAACCT-1 1756 5959 9  
Donor1-CTACGTTCGTAGCTAAA-1 1788 4753 10  
Donor1-CTACGTTCGTTGCTCCT-1 951 3001 8  
Donor1-CTACGTCTCATTATCC-1 5078 15839 1  
Donor1-CTAGAGTCACCACGTG-1 7428 33472 2  
Donor1-CTAGAGTTCTATCCCG-1 1472 3163 11  
Donor1-CTAGCCTCAAGCGAGT-1 2074 5979 6  
Donor1-CTAGCCTCAGCTGCAC-1 2781 7749 10  
Donor1-CTAGCCTGTGGCTCCA-1 1246 3399 13  
Donor1-CTAGTGATCAGCAACT-1 2835 10438 6  
Donor1-CTAGTGATCGCTGATA-1 1186 4240 8  
Donor1-CTCACACCACAGAGGT-1 1581 4259 13  
Donor1-CTCACACCAGTCAGCC-1 1374 4188 9  
Donor1-CTCAGAAAGCCAGAAC-1 2958 6474 5  
Donor1-CTCAGAATCTAACCGA-1 1616 4656 10  
Donor1-CTCATTAAGTGTCCAT-1 2230 3750 5  
Donor1-CTCATTACACTGCCAG-1 2506 7867 11  
Donor1-CTCATTATCGGCGCTA-1 1134 3463 8  
Donor1-CTCATTATCTACCAGA-1 2322 5556 6  
Donor1-CTCCTAGAGCTCCCAG-1 2982 6383 3  
Donor1-CTCGAAAAGAAGAAGC-1 1157 2832 10  
Donor1-CTCGAAACACCAACCG-1 7266 32479 4  
Donor1-CTCGAAAGTTATCCGA-1 1664 5492 13  
Donor1-CTCGAGGAGACGACGT-1 1696 2939 3  
Donor1-CTCGAGGAGCGTTGCC-1 1939 3790 3  
Donor1-CTCGAGGGTGGTCCGT-1 1519 4342 10

Donor1-CTCGGGAAGGCCCTCA-1 1887 9344 8  
Donor1-CTCGTACGTTACCGAT-1 4034 20448 10  
Donor1-CTCGTCAAGCTGCGAA-1 2944 7204 3  
Donor1-CTCGTCACAGCGATCC-1 1441 3366 11  
Donor1-CTCGTCACATCCTAGA-1 2478 13741 8  
Donor1-CTCTAATAGACCTAGG-1 1911 10049 8  
Donor1-CTCTAATAGTAAGTAC-1 1762 3351 2  
Donor1-CTCTAATAGTACGCC-1 2462 7390 10  
Donor1-CTCTAATAGTCACGCC-1 2879 14067 7  
Donor1-CTCTAATCACTACAGT-1 1204 3338 9  
Donor1-CTCTAATGTCCTCCAT-1 1862 4244 6  
Donor1-CTCTAATTCGAATCCA-1 1867 6320 13  
Donor1-CTCTACGAGCTACCGC-1 1074 3705 8  
Donor1-CTCTACGAGGACATTA-1 2097 8180 8  
Donor1-CTCTACGGTATGAATG-1 1907 4194 11  
Donor1-CTCTGGTGTATGAATG-1 2199 7270 13  
Donor1-CTCTGGTGTCTCTCGT-1 2394 6944 13  
Donor1-CTGAACTCATGCAAC-1 1666 3603 11  
Donor1-CTGAAGTGTCCAGTAT-1 3001 14305 7  
Donor1-CTGAAGTTCAGAGGA-1 1386 3455 13  
Donor1-CTGAAGTTCGAATGGG-1 1422 2922 11  
Donor1-CTGATAGTCTTTAGTC-1 1277 3951 8  
Donor1-CTGATCCAGAAACCTA-1 4199 13954 10  
Donor1-CTGATCCCAAGTCTAC-1 2724 6926 11  
Donor1-CTGCCTAAGTGTGAAT-1 1381 3186 11  
Donor1-CTGCGGATCGTCCGTT-1 3192 7907 3  
Donor1-CTGGTCTCAAGTTGTC-1 2050 3781 3  
Donor1-CTGGTCTGTCAACTGT-1 1541 4096 7  
Donor1-CTGGTCTGTGGTAACG-1 4574 17383 10  
Donor1-CTGTGCTAGAAACGAG-1 1575 3566 11  
Donor1-CTGTGCTAGTTCGATC-1 1192 3289 7  
Donor1-CTGTTTATCGCTAGCG-1 2659 8236 13  
Donor1-CTTAACTAGAATAGGG-1 2213 5895 6  
Donor1-CTTAACTCAAACGTGG-1 1466 3813 13  
Donor1-CTTAACTCAGGCTGAA-1 7741 42863 2  
Donor1-CTTACCGAGAGTTGGC-1 1185 3142 10  
Donor1-CTTACCGCACGCGAAA-1 6137 23527 1  
Donor1-CTTACCGCAGCGTAAG-1 3674 16139 10  
Donor1-CTTACCGTCGAGCCCA-1 1781 9269 8  
Donor1-CTTACCGTCTTAACCT-1 4965 25279 10  
Donor1-CTTAGGAGTGATAAAC-1 3937 9956 1  
Donor1-CTTAGGAGTTGCTCCT-1 1065 2832 7  
Donor1-CTTAGGATCAGTGCAT-1 1554 4319 13  
Donor1-CTTCTCTCAGCGTAAG-1 5605 18407 2  
Donor1-CTTCTCTGTTACGGC-1 1871 5120 13  
Donor1-CTTTGCGAGGCTCATT-1 2959 6804 6  
Donor1-CTTTGCGAGTGCTGCC-1 3015 9805 11  
Donor1-GAAACTCAGGACATTA-1 1129 3180 7  
Donor1-GAAACTCAGGCCCTTG-1 4337 13206 1  
Donor1-GAAACTCCAACCTGCGC-1 2426 7399 13  
Donor1-GAAACTCGTCATCCCT-1 1542 3426 13  
Donor1-GAAACTCGTCTCATCC-1 3235 18658 7  
Donor1-GAAACTCTCCTGTACC-1 1143 3348 9  
Donor1-GAAACTCTCTATCCTA-1 2029 8171 7  
Donor1-GAAATGACACGCATCG-1 1610 7003 8  
Donor1-GAAATGAGTGCGAAAC-1 3669 8833 4

|                           |      |       |    |
|---------------------------|------|-------|----|
| Donor1-GAAATGATCATGCAAC-1 | 1756 | 5415  | 9  |
| Donor1-GAACATCAGTGGGCTA-1 | 1378 | 3465  | 10 |
| Donor1-GAACATCCAAGCCGCT-1 | 3441 | 8022  | 3  |
| Donor1-GAACATCGTACATCCA-1 | 1927 | 5341  | 13 |
| Donor1-GAACATCGTTTCCACC-1 | 1109 | 3265  | 8  |
| Donor1-GAACATCGTTTGACTG-1 | 2526 | 4600  | 6  |
| Donor1-GAACCTATCCTAGTGA-1 | 1407 | 4000  | 9  |
| Donor1-GAACGGAAGTGGAGTC-1 | 1211 | 3529  | 7  |
| Donor1-GAAGCAGTCGTGGACC-1 | 2301 | 8366  | 10 |
| Donor1-GAATAAGAGAGGACGG-1 | 3108 | 8275  | 6  |
| Donor1-GAATAAGAGTCAAGGC-1 | 6352 | 21145 | 2  |
| Donor1-GAATAAGGTCTGATCA-1 | 1923 | 4923  | 13 |
| Donor1-GAATGAAAGTTTGCGT-1 | 3011 | 10170 | 11 |
| Donor1-GACACGCCAATCTGCA-1 | 1429 | 4383  | 7  |
| Donor1-GACCAATTCTTGCAAG-1 | 1727 | 4958  | 13 |
| Donor1-GACCTGGAGAGACTTA-1 | 3528 | 8685  | 3  |
| Donor1-GACCTGGAGCATGGCA-1 | 1684 | 4427  | 13 |
| Donor1-GACCTGGCAGGGTATG-1 | 1230 | 3876  | 8  |
| Donor1-GACCTGGCAGTCAGCC-1 | 3499 | 8687  | 3  |
| Donor1-GACGCGTGTTATCGGT-1 | 6412 | 24719 | 2  |
| Donor1-GACGTGCAGTGTCCCG-1 | 1579 | 5003  | 9  |
| Donor1-GACGTGCCAAAGGTGC-1 | 5311 | 19933 | 1  |
| Donor1-GACGTTAAGAATTCCC-1 | 5190 | 17089 | 1  |
| Donor1-GACGTTACAGCCAATT-1 | 8155 | 48781 | 1  |
| Donor1-GACGTTACAGCGTCCA-1 | 1907 | 3733  | 6  |
| Donor1-GACTAACAGTCACGCC-1 | 2208 | 8611  | 7  |
| Donor1-GACTAACGTACTCGCG-1 | 4360 | 19643 | 4  |
| Donor1-GACTAACTCCACGTTC-1 | 1642 | 4239  | 10 |
| Donor1-GACTACAAGCGTCTAT-1 | 1408 | 3499  | 13 |
| Donor1-GACTACAAGCGTGTCC-1 | 2075 | 5951  | 10 |
| Donor1-GACTACAAGTTCGCAT-1 | 2116 | 6867  | 13 |
| Donor1-GACTACAGTGCTAGCC-1 | 1400 | 2955  | 13 |
| Donor1-GACTGCGAGGATTCGG-1 | 2244 | 7258  | 10 |
| Donor1-GAGCAGACACAACGTT-1 | 2214 | 7338  | 10 |
| Donor1-GAGCAGACAGTTCCCT-1 | 2930 | 6189  | 3  |
| Donor1-GAGTCCGAGTACATGA-1 | 1475 | 3745  | 13 |
| Donor1-GAGTCCGTCGCCTGAG-1 | 1278 | 3030  | 11 |
| Donor1-GATCAGTAGCCAGGAT-1 | 1324 | 4351  | 9  |
| Donor1-GATCAGTAGGGAGTAA-1 | 2281 | 6584  | 11 |
| Donor1-GATCAGTAGTGCGATG-1 | 1251 | 4460  | 7  |
| Donor1-GATCAGTCATATGCTG-1 | 1679 | 4130  | 10 |
| Donor1-GATCGATCAGCTATTG-1 | 1746 | 6293  | 7  |
| Donor1-GATCGATGTCCATGAT-1 | 3456 | 8342  | 3  |
| Donor1-GATCGATGTGTTGAGG-1 | 4119 | 11991 | 3  |
| Donor1-GATCGCGTCGACAGCC-1 | 7270 | 34622 | 3  |
| Donor1-GATCGTACAGTCTTCC-1 | 3072 | 16912 | 7  |
| Donor1-GATGAAAAGCACAGGT-1 | 2004 | 5591  | 10 |
| Donor1-GATGAAAAGCTGGAAC-1 | 1614 | 4791  | 9  |
| Donor1-GATGAAAGTGTGAATA-1 | 1121 | 2866  | 13 |
| Donor1-GATGAGGAGGCCCTCA-1 | 3201 | 11604 | 11 |
| Donor1-GATGAGGTCAGGCGAA-1 | 1420 | 3100  | 11 |
| Donor1-GATGAGGTCGCCTGTT-1 | 1898 | 6175  | 10 |
| Donor1-GATGCTAAGGCTAGCA-1 | 1200 | 2969  | 11 |
| Donor1-GATTCAGCATGAGCGA-1 | 2180 | 7347  | 10 |
| Donor1-GATTCAGGTCAGGACA-1 | 3530 | 7881  | 6  |
| Donor1-GCAAAGTAGGTTACCT-1 | 1341 | 3334  | 10 |

Donor1-GCAAACCTTCTCAAACG-1 2457 8924 9  
Donor1-GCAATCAAGATCCTGT-1 1985 3668 2  
Donor1-GCAATCACACAAGCCC-1 1516 3632 13  
Donor1-GCAATCACAGAGTGTG-1 3125 6567 1  
Donor1-GCAATCACATTGCGGC-1 3575 11628 11  
Donor1-GCACATAGTCAACTGT-1 2231 6547 11  
Donor1-GCACTCTAGGTACTCT-1 5855 18674 2  
Donor1-GCACTCTTCCCAAGTA-1 2520 13532 8  
Donor1-GCACTCTTCGCTTAGA-1 2293 8055 13  
Donor1-GCAGCCACAGCTCGCA-1 1540 3407 10  
Donor1-GCAGTTAAGATGCCAG-1 4153 11647 6  
Donor1-GCAGTTAAGTGTACGG-1 1023 3086 8  
Donor1-GCATAACAGTCGCGGTT-1 2293 10440 8  
Donor1-GCATAACATCTCCTATA-1 1276 3947 7  
Donor1-GCATGATAGAGCTATA-1 2017 4617 11  
Donor1-GCATGATAGCTTCGCG-1 2500 6475 6  
Donor1-GCATGATAGTATCGAA-1 1716 5154 13  
Donor1-GCATGATCATCCGGGT-1 1621 4771 13  
Donor1-GCATGATGTCATACTG-1 2559 8172 6  
Donor1-GCCAAATAGCGATAGC-1 1683 6212 8  
Donor1-GCCAAATCAAGCCTAT-1 3260 7368 3  
Donor1-GCCTCTAGTCTGGTCG-1 1933 7745 7  
Donor1-GCCTCTATCAAAGACA-1 2723 5374 2  
Donor1-GCGACCATCGTAGGTT-1 1561 4672 8  
Donor1-GCGAGAAAGCGACGTA-1 2219 8399 7  
Donor1-GCGAGAACATTGTGCA-1 4028 10700 1  
Donor1-GCGAGAAGTTCGCGAC-1 2129 6935 10  
Donor1-GCGAGAATCATGCATG-1 6177 23465 5  
Donor1-GCGCAACAGCGTCTAT-1 6468 23893 3  
Donor1-GCGCAACGTGGCAAAC-1 1489 5813 8  
Donor1-GCGCCAAAGACTCGGA-1 2057 5254 6  
Donor1-GCGCCAAAGTATGACA-1 1076 3604 8  
Donor1-GCGCCAACAATGAAAC-1 2002 5324 10  
Donor1-GCGCCAAGTAGGCATG-1 1586 4309 13  
Donor1-GCGCCAAGTGCAGGTA-1 2451 7367 13  
Donor1-GCGCCAATCTCATTCA-1 2490 7765 10  
Donor1-GCGCGATCAAGGACAC-1 3690 8742 3  
Donor1-GCGGGTTGTGATGCC-1 3310 11456 11  
Donor1-GCGGGTTGTTCCGTCT-1 1765 5083 13  
Donor1-GCTCCTAAGCGAGAAA-1 1973 7806 9  
Donor1-GCTCCTATCATCGCTC-1 5125 16811 3  
Donor1-GCTCTGTAGCGGATCA-1 2441 7931 10  
Donor1-GCTCTGTGTACTCGCG-1 1823 4488 7  
Donor1-GCTCTGTGTGAACCTT-1 3131 7198 3  
Donor1-GCTCTGTGTGCACTTA-1 2540 8443 10  
Donor1-GCTCTGTGTTACGACT-1 2154 7202 10  
Donor1-GCTCTGTGTTTACTCT-1 1629 5807 8  
Donor1-GCTGCGAAGATGCGAC-1 6527 28357 6  
Donor1-GCTGCGACAGCTGTGC-1 2968 15185 7  
Donor1-GCTGCGATCGCAAAC-1 1261 3363 9  
Donor1-GCTGCTTAGTTTCCTT-1 2392 6188 11  
Donor1-GCTGCTTGTAAGCACG-1 1664 6050 13  
Donor1-GCTGCTTTCATTCTA-1 4604 12359 5  
Donor1-GCTGCTTTCGTTTGCC-1 1165 3558 8  
Donor1-GCTGCTTTCCTGGAGCC-1 1471 3690 10  
Donor1-GCTGGGTGTTCCGTCT-1 1376 5327 8

|                            |      |       |    |
|----------------------------|------|-------|----|
| Donor1-GCTGGGTTCCAGGGCT-1  | 4116 | 11074 | 1  |
| Donor1-GCTTCCAAGGACAGAA-1  | 2643 | 5476  | 3  |
| Donor1-GCTTGAACACACCGCA-1  | 1404 | 5538  | 8  |
| Donor1-GCTTGAATCGAGCCCA-1  | 3837 | 8659  | 3  |
| Donor1-GCTTGAATCTTTACAC-1  | 2221 | 6476  | 9  |
| Donor1-GGAAAGCCAGACGCAA-1  | 3534 | 8538  | 6  |
| Donor1-GGAAAGCCATCTCCA-1   | 3552 | 9236  | 3  |
| Donor1-GGAAAGCTCGAATGGG-1  | 1900 | 5402  | 10 |
| Donor1-GGAACTTTCAGTGTTG-1  | 1861 | 6704  | 7  |
| Donor1-GGAATAACAGATCGGA-1  | 1116 | 3810  | 8  |
| Donor1-GGAATAAGTTGGGACA-1  | 2605 | 12801 | 7  |
| Donor1-GGAATAATCACTCCTG-1  | 1654 | 4204  | 13 |
| Donor1-GGACAAGAGGACAGCT-1  | 1042 | 3891  | 8  |
| Donor1-GGACAGACAAGTCTAC-1  | 6403 | 22967 | 3  |
| Donor1-GGACATTAGACTAGAT-1  | 2299 | 5890  | 10 |
| Donor1-GGACATTAGCTCTCGG-1  | 2709 | 7462  | 4  |
| Donor1-GGACATTAGGAGTCTG-1  | 1774 | 7183  | 7  |
| Donor1-GGACATTCATTATCTC-1  | 1742 | 6600  | 7  |
| Donor1-GGACATTTCCACGACG-1  | 1500 | 5088  | 7  |
| Donor1-GGACGTCCAATGGTCT-1  | 1129 | 3693  | 8  |
| Donor1-GGACGTTCGTAACGCG-1  | 1263 | 3842  | 13 |
| Donor1-GGACGTCTCGAACTGT-1  | 2110 | 7698  | 13 |
| Donor1-GGACGTCTCGGAAACG-1  | 1643 | 5275  | 9  |
| Donor1-GGAGCAATCTGAAAGA-1  | 3389 | 11795 | 11 |
| Donor1-GGATGTTAGTTGTAGA-1  | 1998 | 7147  | 7  |
| Donor1-GGATGTTTCCAACGG-1   | 1704 | 5003  | 10 |
| Donor1-GGATTACCAGCTGTAT-1  | 4617 | 13263 | 2  |
| Donor1-GGATTACCAGTTCATG-1  | 2038 | 3951  | 2  |
| Donor1-GGCAATTAGAGGTTGC-1  | 2942 | 7085  | 5  |
| Donor1-GGCAATTAGCTGTCTA-1  | 2811 | 8696  | 11 |
| Donor1-GGCAATTGTGCAACTT-1  | 1470 | 5280  | 13 |
| Donor1-GGCAATTGTGTGAAAT-1  | 2748 | 6165  | 3  |
| Donor1-GGCCGATGTCGGCACT-1  | 3132 | 7177  | 3  |
| Donor1-GGCCGATTCCTCAACC-1  | 1739 | 4798  | 11 |
| Donor1-GGCCGATTCGGAATCT-1  | 2597 | 8814  | 6  |
| Donor1-GGCGACTAGGCTCATT-1  | 1541 | 3499  | 11 |
| Donor1-GGCGACTTCTTGTGTTG-1 | 2695 | 9928  | 10 |
| Donor1-GGCGTGTAGCCCAACC-1  | 1470 | 7312  | 8  |
| Donor1-GGCGTGTAGTGGGCTA-1  | 3295 | 11751 | 6  |
| Donor1-GGCGTGTAGTTCGATC-1  | 2850 | 6554  | 3  |
| Donor1-GGCGTGTGTCGAGTTT-1  | 1355 | 3606  | 10 |
| Donor1-GGCTCGAGTCACTGGC-1  | 2257 | 5093  | 5  |
| Donor1-GGCTCGAGTGAGGCTA-1  | 4143 | 10197 | 3  |
| Donor1-GGCTCGATCCTAGAAC-1  | 1513 | 4220  | 8  |
| Donor1-GGCTCGATCGATGAGG-1  | 4636 | 13275 | 3  |
| Donor1-GGCTGGTGTGAGCTAT-1  | 2713 | 5955  | 3  |
| Donor1-GGCTGGTTCAGAAGT-1   | 2785 | 9281  | 10 |
| Donor1-GGGAATGAGACCTTTG-1  | 1522 | 3633  | 7  |
| Donor1-GGGAATGCAATTCCTT-1  | 3451 | 8281  | 3  |
| Donor1-GGGAATGCAGCTCGAC-1  | 1299 | 4735  | 8  |
| Donor1-GGGAATGTCACTTCAT-1  | 1908 | 5601  | 13 |
| Donor1-GGGAATGTCTGAAAGA-1  | 3952 | 15622 | 6  |
| Donor1-GGGACCTAGCGTGAAC-1  | 3305 | 9843  | 6  |
| Donor1-GGGACCTCAGGGTTAG-1  | 3172 | 10057 | 6  |
| Donor1-GGGAGATTCGGTTAAC-1  | 4482 | 13283 | 1  |
| Donor1-GGGATGAAGCTATGCT-1  | 882  | 3010  | 8  |



Donor1-GGGATGAAGGCATGTG-1 2044 8057 9  
Donor1-GGGATGAGTGAGCGAT-1 2008 5573 10  
Donor1-GGGATGATCCTCAATT-1 1518 5396 8  
Donor1-GGGCACTGTCTTGTCC-1 4251 21116 10  
Donor1-GGGCATCTCAGCTCGG-1 2443 6916 11  
Donor1-GGGTTGCAGTAATCCC-1 2250 7284 6  
Donor1-GGGTTGCCACGTCAGC-1 1184 2827 13  
Donor1-GGTATTGAGAGACTTA-1 1295 2900 10  
Donor1-GGTATTGCAAGAGGCT-1 1874 3307 6  
Donor1-GGTATTGGTGCCTGGT-1 3045 13544 7  
Donor1-GGTGCGTAGCGTAATA-1 1370 2853 11  
Donor1-GGTGTTAGTCATTAGC-1 2594 5221 2  
Donor1-GGTGTTAGTCTTTCAT-1 3797 23836 7  
Donor1-GTAACGTCACAGATTC-1 2227 7041 9  
Donor1-GTAACTGCAGTGGGAT-1 2795 5780 3  
Donor1-GTAACTGGTTGGTGGA-1 4648 12671 1  
Donor1-GTAACTGTCTTGAGGT-1 5990 41729 10  
Donor1-GTACGTAAGTTAACGA-1 2472 5082 5  
Donor1-GTACGTACAGATGAGC-1 1973 7666 9  
Donor1-GTACGTATCCAAGCCG-1 1836 5575 13  
Donor1-GTACGTATCTGAGGGA-1 1241 3151 9  
Donor1-GTACTTTGTTCCACAA-1 2870 5912 2  
Donor1-GTACTTTTCGAAATA-1 1636 4511 13  
Donor1-GTAGGCCAGCGCCTCA-1 8534 51533 6  
Donor1-GTAGGCCAGCTGTTA-1 4876 12597 2  
Donor1-GTAGGCCGTGCAACGA-1 6887 34228 4  
Donor1-GTAGTCACAAGTCTGT-1 1606 4465 13  
Donor1-GTAGTCAGTATAGTAG-1 2215 4985 11  
Donor1-GTAGTCATCAAAGACA-1 6683 26628 2  
Donor1-GTAGTCATCCGAACGC-1 5621 20329 3  
Donor1-GTATCTTAGCTGTTCA-1 1532 3692 13  
Donor1-GTATCTTAGGCATGGT-1 2381 7647 6  
Donor1-GTATCTTGTCAGCTAT-1 4522 11916 1  
Donor1-GTATTCTAGAGATGAG-1 7423 35414 5  
Donor1-GTATTCTCAGTTAACC-1 4856 26124 10  
Donor1-GTATTCTGTTCGATTGT-1 5943 22392 1  
Donor1-GTATTCTGTGTTTGGT-1 896 3003 8  
Donor1-GTATTCTTCGACGGAA-1 2320 7299 10  
Donor1-GTCACAAAGTGTTAGA-1 3819 12629 10  
Donor1-GTCACGGTCCCTCTTG-1 2156 3777 5  
Donor1-GTCATTTAGTGTTAGA-1 3834 14850 10  
Donor1-GTCATTTACAGACAG-1 1194 3822 8  
Donor1-GTCATTTGTTCCAACA-1 1096 3809 8  
Donor1-GTCCTCACACAGCCCA-1 2688 5996 6  
Donor1-GTCCTCACAGTAGAGC-1 2606 9226 13  
Donor1-GTCCTCATCTTGAGAC-1 2711 10902 7  
Donor1-GTCTCGTCAGACGCTC-1 1905 3462 2  
Donor1-GTCTCGTTCACCTTAT-1 5179 16504 4  
Donor1-GTCTTCGCATACTACG-1 4311 20182 10  
Donor1-GTCTTCGTCAGTTCGA-1 1326 3364 10  
Donor1-GTGAAGGGTACCGAGA-1 3459 7752 5  
Donor1-GTGAAGGGTCTCCATC-1 2137 7291 13  
Donor1-GTGAAGGTCTGAGTGT-1 1662 4365 10  
Donor1-GTGCAGCGTCCATCCT-1 1231 3513 13  
Donor1-GTGCAGCTCCGAATGT-1 1515 5352 8  
Donor1-GTGCAGCTCTGGTATG-1 1394 3451 11

Donor1-GTGCATAAGATGCCAG-1 1979 3739 5  
Donor1-GTGCATAGTACAGCAG-1 1007 3353 8  
Donor1-GTGCATATCCACTGGG-1 1547 7034 8  
Donor1-GTGCTTCCACAGCGTC-1 2736 5475 6  
Donor1-GTGGGTTCGTATAATGG-1 1355 4751 8  
Donor1-GTGGGTCTCTGACCTC-1 1432 3765 13  
Donor1-GTGTGCGAGATTACCC-1 1103 2919 13  
Donor1-GTGTGCGGTGGAAAGA-1 1013 3027 8  
Donor1-GTGTTAGCAGTACACT-1 3399 11358 11  
Donor1-GTGTTAGCATAACAGCT-1 1845 5152 13  
Donor1-GTGTTAGCATTGCGGC-1 5031 16605 1  
Donor1-GTGTTAGGTAGAAGGA-1 1834 6571 9  
Donor1-GTGTTAGGTCATGCCG-1 1217 3780 9  
Donor1-GTGTTAGGTGGGTATG-1 3911 28301 7  
Donor1-GTGTTAGTCGCCTGTT-1 1294 3170 11  
Donor1-GTTAAGCGTAGCACGA-1 1660 5816 7  
Donor1-GTTAAGCGTTGTTTGG-1 2085 8141 9  
Donor1-GTTAAGCGTTTGACTG-1 1022 2901 8  
Donor1-GTTACAGCAAAGGTGC-1 2349 11343 8  
Donor1-GTTACAGCAGCTTAAC-1 1868 5432 13  
Donor1-GTTACAGTCTTGGGTA-1 2650 8923 10  
Donor1-GTTCATTGTGGCAAAC-1 2158 6390 10  
Donor1-GTTCGGGAGCTAAGAT-1 1251 4352 8  
Donor1-GTTCGGGAGGCGTACA-1 1516 4193 9  
Donor1-GTTCGGGCACTCTGTC-1 3183 7405 3  
Donor1-GTTCGGGCATGGATGG-1 2779 6093 3  
Donor1-GTTCGGGGTCTCTTTA-1 4327 10851 3  
Donor1-GTTCGGGGTGAACCTT-1 4157 11271 6  
Donor1-GTTTCTAAGGTTACCT-1 2279 8307 9  
Donor1-TAAACCGTCACATACG-1 1549 3199 11  
Donor1-TAAGAGAGTAAGTTC-1 1870 6938 9  
Donor1-TAAGAGATCTCAAACG-1 1145 2985 9  
Donor1-TAAGCGTCACGTCAGC-1 3131 11307 6  
Donor1-TAAGCGTGTGGACGAT-1 1963 5970 13  
Donor1-TAAGCGTTCCTATTCA-1 3117 12684 10  
Donor1-TACACGAAGCGGCTTC-1 2334 6286 6  
Donor1-TACACGACATGAACCT-1 2725 8230 10  
Donor1-TACACGAGTGGACGAT-1 4930 16188 2  
Donor1-TACACGATCTAACCGA-1 3644 8317 3  
Donor1-TACCTATCATGGGACA-1 3384 7965 2  
Donor1-TACCTATTCCAGATCA-1 2315 3776 5  
Donor1-TACCTATTCGCTGATA-1 2526 8490 10  
Donor1-TACCTTAGTAAACCTC-1 2536 7915 10  
Donor1-TACCTTATCTAACTGG-1 5190 21026 6  
Donor1-TACCTTATCTGGCGAC-1 1358 3380 13  
Donor1-TACGGGCCAATCAGAA-1 1269 4447 7  
Donor1-TACGGGCCATCGGACC-1 2609 5166 2  
Donor1-TACGGGCGTTCGCGAC-1 4197 10678 5  
Donor1-TACGGGCTCTCTGCTG-1 6764 25398 2  
Donor1-TACGGTAAGTAGCCGA-1 6866 34719 5  
Donor1-TACGGTAGTAAGGGCT-1 4920 14939 2  
Donor1-TACTCATCAAGAGTCG-1 1514 4515 13  
Donor1-TACTCATCCGAACGC-1 1377 5032 8  
Donor1-TACTCGCAGCACCGCT-1 1462 2857 11  
Donor1-TACTCGCGTTCTGGTA-1 1048 3622 8  
Donor1-TACTTACCATGAGCGA-1 3459 7851 2

Donor1-TACTTACTCCACGACG-1 4702 14821 6  
Donor1-TACTTACTCCCATTAT-1 4184 12544 6  
Donor1-TACTTGTTAGCTTTGGT-1 5910 24056 1  
Donor1-TACTTGTTACGCGGT-1 6413 21713 3  
Donor1-TAGACCACATGGGAAC-1 2637 11248 7  
Donor1-TAGACCAGTGACGGTA-1 2075 5202 10  
Donor1-TAGAGCTGTGCTCTTC-1 1473 3162 11  
Donor1-TAGAGCTTCGCTTAGA-1 1794 4978 13  
Donor1-TAGAGCTTCTGGGCCA-1 1850 5348 10  
Donor1-TAGCCGGCACTAGTAC-1 3603 9587 3  
Donor1-TAGCCGGTACTTGAC-1 1789 7865 8  
Donor1-TAGCCGGTTTTAAGCC-1 1630 3832 11  
Donor1-TAGTTGGAGGCGTACA-1 3712 11770 11  
Donor1-TAGTTGGAGGTGTGGT-1 1422 5332 8  
Donor1-TAGTTGGCACATTTCT-1 1900 5935 13  
Donor1-TAGTTGGTCACCATAG-1 4970 14205 2  
Donor1-TATGCCCCAACTTGAC-1 1313 5714 8  
Donor1-TATGCCCTCGTTGACA-1 1547 3664 11  
Donor1-TATTACCAGCTGAACG-1 1645 5187 9  
Donor1-TCAACGATCGCGTTTC-1 1718 3976 11  
Donor1-TCAATCTCACACGCTG-1 3576 12627 11  
Donor1-TCAATCTTCACCGTAA-1 1791 4784 13  
Donor1-TCACAAGAGAGTAAGG-1 1496 3184 10  
Donor1-TCACAAGGTGTAAGTA-1 1624 2826 8  
Donor1-TCACGAAAGACTAGAT-1 1778 5861 13  
Donor1-TCACGAATCAGCTCGG-1 1363 3299 11  
Donor1-TCAGATGGTCCGAACC-1 3116 11989 10  
Donor1-TCAGATGGTTTTCGCTC-1 2817 6345 3  
Donor1-TCAGATGTCTCGTCCGTT-1 1526 6904 8  
Donor1-TCAGATGTCTTGAGGT-1 3247 12066 10  
Donor1-TCAGCAAGTTCGCATCG-1 3003 13006 9  
Donor1-TCAGCAATCAGCACAT-1 2246 6323 13  
Donor1-TCAGCAATCATAGCAC-1 1430 3034 11  
Donor1-TCAGCTCGTAAGGGAA-1 3427 8923 3  
Donor1-TCAGGATGTCAGAGGT-1 1826 5697 13  
Donor1-TCAGGATGTTCTGTTT-1 4262 12708 3  
Donor1-TCAGGTAAGAAGCCCA-1 1405 4193 11  
Donor1-TCAGGTATCTGACCTC-1 3246 10682 11  
Donor1-TCATTTGCAGAAGCAC-1 1702 5610 9  
Donor1-TCATTTGTCTTGGGTA-1 1299 3719 8  
Donor1-TCCACACCAAGTAATG-1 1184 3625 9  
Donor1-TCCACACCAATGCCAT-1 2622 11067 10  
Donor1-TCCACACTCCGTAGTA-1 8210 52299 4  
Donor1-TCCCGATAGCGCTCCA-1 1579 3748 11  
Donor1-TCCCGATGTACAGCAG-1 1477 4379 8  
Donor1-TCCCGATGTTAAGAAC-1 3233 7275 3  
Donor1-TCCCGATTCGAACGGA-1 3067 7204 3  
Donor1-TCGAGGCAGTCATCCA-1 1158 3002 6  
Donor1-TCGAGGCCAGTTTACG-1 1410 2926 11  
Donor1-TCGAGGCGTAAATACG-1 1792 5095 13  
Donor1-TCGAGGCGTTCGTCTC-1 3456 7381 5  
Donor1-TCGAGGCTCTCAAGTG-1 4833 28569 10  
Donor1-TCGAGGCTCTGCTGTC-1 1962 5410 10  
Donor1-TCGCGAGGTCTGCCAG-1 1377 2839 11  
Donor1-TCGCGAGTCTTCATGT-1 1669 3791 11  
Donor1-TCGCGTTAGCATCATC-1 1883 6741 13

Donor1-TCGCGTTTCACGCATA-1 5162 14395 2  
Donor1-TCGCGTTTCATGTGGT-1 2774 6190 3  
Donor1-TCGGGACGTCTAGAGG-1 1408 4280 7  
Donor1-TCGGGACTCGCCGTGA-1 1315 4303 7  
Donor1-TCGGTAAAGCACGCCT-1 2448 4921 3  
Donor1-TCGTACCAGGAGTTTA-1 1375 4407 8  
Donor1-TCGTACCCAGCTGCTG-1 2782 7688 11  
Donor1-TCGTACCCATTACCTT-1 2221 8532 9  
Donor1-TCGTACCCATTATCTC-1 1633 4438 13  
Donor1-TCGTACCGTAAATGAC-1 2691 11035 10  
Donor1-TCGTACCTCACGACTA-1 1016 3174 8  
Donor1-TCGTAGATCATCGCTC-1 1529 4036 10  
Donor1-TCTATTGAGTACATGA-1 8438 71267 10  
Donor1-TCTATTGGTATTCGTG-1 2910 6679 3  
Donor1-TCTATTGGTTCTGTTT-1 2230 6990 10  
Donor1-TCTCATAAGGCGACAT-1 1188 4108 8  
Donor1-TCTCATAGTAGCTCCG-1 1526 4900 13  
Donor1-TCTCTAAAGATGAGAG-1 1813 5498 13  
Donor1-TCTGAGAAGCTAGCCC-1 3255 8115 3  
Donor1-TCTGAGAAGGGTATCG-1 1953 5203 10  
Donor1-TCTGAGAAGTTCGATC-1 2310 4572 5  
Donor1-TCTGGAAGTAGCGCTC-1 5872 30193 10  
Donor1-TCTTCGGAGACTTTCG-1 2307 6283 13  
Donor1-TCTTTCCAGCACCGCT-1 1727 5375 13  
Donor1-TGAAAGACAGCATGAG-1 4758 20951 10  
Donor1-TGACAACAGCCAGTTT-1 2071 7024 7  
Donor1-TGACAACAGCTAACTC-1 1332 5074 8  
Donor1-TGACAACCACATGTGT-1 1336 3884 9  
Donor1-TGACGGCCAGCTGTAT-1 5400 16133 1  
Donor1-TGACTAGGTCTTGTC-1 1329 2909 13  
Donor1-TGACTTTCACCTTGTC-1 1324 4199 9  
Donor1-TGACTTTGTGCACGAA-1 3114 9744 11  
Donor1-TGACTTTGTTTACTCT-1 4238 10476 3  
Donor1-TGACTTTTCAGTTCGA-1 2610 17175 8  
Donor1-TGACTTTTCATTGCC-1 1437 3744 13  
Donor1-TGAGCATCAAACAACA-1 2638 5935 3  
Donor1-TGAGCATTCCAAGCCG-1 1153 3375 8  
Donor1-TGAGCATTCCAGGGCT-1 1956 6061 10  
Donor1-TGAGCCGAGTGCCATT-1 1167 3699 8  
Donor1-TGAGCCGGTACATGTC-1 2121 6606 11  
Donor1-TGAGGGAAGAGGGATA-1 3301 10044 11  
Donor1-TGAGGGAAGGACAGCT-1 3696 9482 3  
Donor1-TGAGGGAAGTGTACGG-1 1396 3689 10  
Donor1-TGAGGGACAACGCACC-1 3803 31921 8  
Donor1-TGAGGGAGTCAGAATA-1 1885 4975 13  
Donor1-TGAGGGATCTACCTGC-1 2196 5291 12  
Donor1-TGATTTCCAAGGACAC-1 1515 5059 7  
Donor1-TGATTTCGTATCACCA-1 3378 6915 2  
Donor1-TGCACCTGTATTACCG-1 2173 6880 10  
Donor1-TGCACCTGTCTGGTCG-1 1708 4989 9  
Donor1-TGCCAAACACGTCTCT-1 1319 3261 10  
Donor1-TGCCAAAGTCAAAGCG-1 2146 7655 9  
Donor1-TGCCAAAGTTCTGTTT-1 1816 6298 13  
Donor1-TGCCAAAGTTTGACAC-1 1029 2981 8  
Donor1-TGCCAAATCATCGCTC-1 5207 16167 1  
Donor1-TGCCCATAGCGAAGGG-1 4625 16193 3

|                             |      |       |    |
|-----------------------------|------|-------|----|
| Donor1-TGCCCATCATCACGAT-1   | 3524 | 7595  | 2  |
| Donor1-TGCCCTAAGTGAAGTT-1   | 1795 | 4802  | 13 |
| Donor1-TGCCCTACACGCTTTC-1   | 5502 | 26177 | 6  |
| Donor1-TGCGCAGAGATCACGG-1   | 2008 | 5750  | 10 |
| Donor1-TGCGCAGAGCTTCGCG-1   | 1055 | 2906  | 8  |
| Donor1-TGCGCAGCACAGGCCT-1   | 1498 | 5459  | 7  |
| Donor1-TGCGCAGGTAGCTCCG-1   | 2654 | 8173  | 11 |
| Donor1-TGCGTGGAGACAAAGG-1   | 3102 | 7805  | 5  |
| Donor1-TGCTACCGTGGTGTAG-1   | 2369 | 7903  | 10 |
| Donor1-TGCTACCTCGGTCCGA-1   | 1714 | 5618  | 9  |
| Donor1-TGCTGCTAGGGTTCCC-1   | 2013 | 4964  | 6  |
| Donor1-TGCTGCTTCGCGCAA-1    | 1276 | 3335  | 13 |
| Donor1-TGGACGCCAACGCACC-1   | 2123 | 5934  | 11 |
| Donor1-TGGACGCTCGCGGTT-1    | 1503 | 3744  | 13 |
| Donor1-TGGACGCTCAGCTCTC-1   | 1900 | 3885  | 3  |
| Donor1-TGGCCAGCACGGACAA-1   | 2621 | 5560  | 3  |
| Donor1-TGGCGCACATCCGCGA-1   | 2680 | 7740  | 11 |
| Donor1-TGGGAAGAGAAGGTGA-1   | 1227 | 3107  | 7  |
| Donor1-TGGGAAGAGAGGTTGC-1   | 1831 | 5849  | 13 |
| Donor1-TGGGAAGTCACAGTAC-1   | 1900 | 4633  | 11 |
| Donor1-TGGTTAGGTTTCGTTGA-1  | 2238 | 8735  | 10 |
| Donor1-TGGTTCCAGATCGATA-1   | 1018 | 4088  | 8  |
| Donor1-TGGTTCCAGCCCAATT-1   | 1739 | 6137  | 8  |
| Donor1-TGGTTCCAGGGATCTG-1   | 1078 | 3623  | 7  |
| Donor1-TGGTTCCAGTGAATTG-1   | 2819 | 5924  | 3  |
| Donor1-TGGTTCCGTGGGTATG-1   | 1852 | 3332  | 4  |
| Donor1-TGTATTTCAGGAGCGAG-1  | 3024 | 13742 | 10 |
| Donor1-TGTATTTCGTACAGTTC-1  | 3080 | 10913 | 11 |
| Donor1-TGTATTTCGTCAATCT-1   | 2834 | 5855  | 2  |
| Donor1-TGTATTCTCGAATGGG-1   | 3430 | 8308  | 3  |
| Donor1-TGTGGTACAGATTGCT-1   | 1508 | 3736  | 11 |
| Donor1-TGTGGTACAGCCTTTC-1   | 1362 | 4855  | 7  |
| Donor1-TGTGGTACATTCCCTCG-1  | 3085 | 6921  | 4  |
| Donor1-TGTGTTTTAGTACGATA-1  | 1697 | 3995  | 11 |
| Donor1-TGTTCCGTCACCCTCA-1   | 1561 | 3514  | 10 |
| Donor1-TTAACTCGTTCATGGT-1   | 4012 | 10432 | 4  |
| Donor1-TTAACTCTCAATCTCT-1   | 3386 | 15675 | 10 |
| Donor1-TTAGGACAGCGCCTCA-1   | 6597 | 23427 | 1  |
| Donor1-TTAGGCAGTCCTCCAT-1   | 1750 | 6035  | 10 |
| Donor1-TTAGTTCCATCCCATC-1   | 5995 | 26691 | 4  |
| Donor1-TTAGTTTCGTATCTGCA-1  | 4792 | 14723 | 1  |
| Donor1-TTAGTTCTCGCCAGCA-1   | 1640 | 4726  | 9  |
| Donor1-TTATGCTGTGACTACT-1   | 1411 | 4281  | 13 |
| Donor1-TTATGCTGTGCGAAAC-1   | 4622 | 15147 | 4  |
| Donor1-TTATGCTGTTCCACGG-1   | 1610 | 5078  | 13 |
| Donor1-TTCCCAGGTGAGGGTT-1   | 1931 | 9527  | 8  |
| Donor1-TTCCCAGTCAGTTAGC-1   | 5235 | 18333 | 6  |
| Donor1-TTCCCAGTCGAATCCA-1   | 3253 | 7321  | 2  |
| Donor1-TTCGAAGAGTGGGCTA-1   | 2159 | 8234  | 7  |
| Donor1-TTCGGTCAGTACGTTTC-1  | 2033 | 6111  | 10 |
| Donor1-TTCGGTCCAAGCGATG-1   | 2662 | 5517  | 3  |
| Donor1-TTCGGTCCACAACACTGT-1 | 1156 | 3417  | 9  |
| Donor1-TTCGGTCTCAGGTTCA-1   | 3620 | 8075  | 2  |
| Donor1-TTCTCAACAGCCTATA-1   | 1846 | 5370  | 13 |
| Donor1-TTCTCAAGTCGGCATC-1   | 1591 | 4181  | 6  |
| Donor1-TTCTCAAGTGCCTGTG-1   | 3275 | 11031 | 11 |

|                            |      |       |    |
|----------------------------|------|-------|----|
| Donor1-TTCTCAATCACGCATA-1  | 3300 | 10802 | 11 |
| Donor1-TTCTCCTAGGACTGGT-1  | 1378 | 5365  | 8  |
| Donor1-TTCTCCTTCCGCATAA-1  | 3880 | 8759  | 2  |
| Donor1-TTCTCCTTCTTCTGGC-1  | 1598 | 4935  | 9  |
| Donor1-TTGAACGCAACGCACC-1  | 1542 | 4734  | 9  |
| Donor1-TTGAACGCAGCGAACA-1  | 3470 | 11488 | 12 |
| Donor1-TTGACTTCACACCGAC-1  | 1174 | 3482  | 8  |
| Donor1-TTGACTTGTATAGGGC-1  | 2781 | 7061  | 11 |
| Donor1-TTGACTTGTCTGACTGC-1 | 3223 | 7177  | 3  |
| Donor1-TTGACTTTCGCCATAA-1  | 1549 | 3456  | 11 |
| Donor1-TTGCCGTCAATAAGCA-1  | 2046 | 4082  | 4  |
| Donor1-TTGCGTCAGATGTGGC-1  | 2525 | 7585  | 11 |
| Donor1-TTGCGTCGTGACTCAT-1  | 6834 | 31158 | 1  |
| Donor1-TTGGAACAGCTCCTTC-1  | 1627 | 5786  | 13 |
| Donor1-TTGGAACAGTCGATAA-1  | 2361 | 9335  | 7  |
| Donor1-TTGGCAACACGAGAGT-1  | 2861 | 6464  | 4  |
| Donor1-TTGGCAAGTGATAAGT-1  | 5523 | 17362 | 2  |
| Donor1-TTGTAGGAGGCATTGG-1  | 1486 | 4473  | 13 |
| Donor1-TTGTAGGTCACTCCTG-1  | 2508 | 6346  | 11 |
| Donor1-TTGTAGGTCCAGATCA-1  | 906  | 2863  | 8  |
| Donor1-TTTACTGAGAAACGCC-1  | 3227 | 8098  | 3  |
| Donor1-TTTACTGGTGGCGAAT-1  | 4898 | 21436 | 6  |
| Donor1-TTTATGCAGGGCACTA-1  | 3528 | 9114  | 3  |
| Donor1-TTTATGCAGTATCGAA-1  | 2419 | 7824  | 7  |
| Donor1-TTTATGCCATGACATC-1  | 1165 | 3794  | 8  |
| Donor1-TTTATGCGTTAGTGGG-1  | 1732 | 5701  | 9  |
| Donor1-TTTCCTCAGATATGGT-1  | 1256 | 5295  | 8  |
| Donor1-TTTCCTCTCACATAGC-1  | 3907 | 10304 | 3  |
| Donor1-TTTCCTCTCGCCAAAT-1  | 1482 | 5351  | 8  |
| Donor1-TTTGCGCAGCGCCTCA-1  | 1984 | 6647  | 13 |
| Donor1-TTTGGTTCAGTAAGCG-1  | 1685 | 4049  | 13 |
| Donor1-TTTGGTGTGCATGCCG-1  | 1118 | 2878  | 9  |
| Donor1-TTTGGTGTGCAACGA-1   | 1469 | 3778  | 13 |
| Donor1-TTTGTCAAGGACTGGT-1  | 5943 | 21537 | 1  |
| Donor1-TTTGTACATGGTAGG-1   | 4807 | 14378 | 1  |
| Donor1-TTTGTACATTGGGCC-1   | 2375 | 4587  | 2  |
| Donor1-AAACCTGCAAAGTCAA-2  | 1721 | 4392  | 10 |
| Donor1-AAACCTGTCATGCATG-2  | 3835 | 10035 | 3  |
| Donor1-AAACGGGCAGCTTAAC-2  | 1250 | 4070  | 8  |
| Donor1-AAAGATGAGACAGACC-2  | 4763 | 14004 | 1  |
| Donor1-AAAGATGAGGGCATGT-2  | 2329 | 9269  | 9  |
| Donor1-AAAGATGAGTGATCGG-2  | 2339 | 5078  | 6  |
| Donor1-AAAGATGCATCCGTGG-2  | 2384 | 13424 | 8  |
| Donor1-AAAGCAACATCCGTGG-2  | 1218 | 3719  | 9  |
| Donor1-AAAGCAAGTTCATGGT-2  | 2151 | 7681  | 13 |
| Donor1-AAAGTAGAGAGCAATT-2  | 2120 | 4655  | 5  |
| Donor1-AAAGTAGGTCGCCATG-2  | 7440 | 41611 | 1  |
| Donor1-AAATGCCAGCAGACTG-2  | 5393 | 17335 | 2  |
| Donor1-AAATGCCTCTCGAGTA-2  | 1237 | 3592  | 13 |
| Donor1-AAATGCCTCTTCGAGA-2  | 6019 | 23650 | 4  |
| Donor1-AACACGTGTGTTGAGG-2  | 4091 | 11580 | 6  |
| Donor1-AACACGTTCTACTCAT-2  | 4940 | 27152 | 6  |
| Donor1-AACCATGCAATGTAAG-2  | 1268 | 3610  | 7  |
| Donor1-AACCATGCAGCAGTTT-2  | 7188 | 42862 | 3  |
| Donor1-AACCATGTCTCCCTGA-2  | 6092 | 22021 | 4  |
| Donor1-AACCGCGAGGCGTACA-2  | 5428 | 20025 | 2  |

Donor1-AACGTTGCACTACAGT-2 3210 7212 3  
Donor1-AACGTTGGTACTTAGC-2 2098 8072 9  
Donor1-AACTCAGAGGGCTTCC-2 2767 5127 5  
Donor1-AACTCCCAGAGTACAT-2 3463 7905 3  
Donor1-AACTCCCAGGCAATTA-2 1624 5279 9  
Donor1-AACTCCCTCATACGGT-2 1569 3853 7  
Donor1-AACTCTTCACACCGAC-2 3568 7391 5  
Donor1-AACTCTTTCGGCGGTT-2 1968 3794 6  
Donor1-AACTGGTGTAGCTGCC-2 1459 6064 8  
Donor1-AACTGGTGTGTGAAAT-2 3496 7977 4  
Donor1-AACTTTCAGGTGCTTT-2 2704 5345 4  
Donor1-AAGACCTAGTACGCC-2 1586 3706 10  
Donor1-AAGACCTAGTCAAGGC-2 2206 6396 10  
Donor1-AAGACCTGTCAAATC-2 1499 5292 8  
Donor1-AAGCCGCAGCAAATCA-2 2554 4556 2  
Donor1-AAGGAGCAGAGAGCTC-2 3024 6805 3  
Donor1-AAGGCAGAGTCATGCT-2 4443 13078 1  
Donor1-AAGGCAGGTGAGCGAT-2 1434 3986 13  
Donor1-AAGGCAGTCGTCACGG-2 2345 6922 13  
Donor1-AAGGTTCCATGAACCT-2 1887 5921 13  
Donor1-AAGGTTTCGTCAGAGGT-2 1925 5050 13  
Donor1-AAGTCTGAGTTTCCTT-2 4000 10293 4  
Donor1-AAGTCTGCACAACGT-2 3103 7154 3  
Donor1-AAGTCTGCAGGCAGTA-2 3627 8360 2  
Donor1-AATCCAGCATCGGTTA-2 2381 8060 10  
Donor1-AATCCAGGTGCTGTAT-2 1710 5852 9  
Donor1-AATCCAGGTTCCCTCCA-2 1345 3767 7  
Donor1-ACACCAAGTAATCACC-2 2325 7058 7  
Donor1-ACACCAAGTCTTGCGG-2 4630 12749 2  
Donor1-ACACCCTCAGGTCCAC-2 2218 7370 13  
Donor1-ACACCCTCATGACATC-2 1602 4512 13  
Donor1-ACACCGGAGGTGCTTT-2 2897 10354 13  
Donor1-ACACCGGCAATCTGCA-2 3155 16169 7  
Donor1-ACACCGGCAGCTCGAC-2 1338 3922 7  
Donor1-ACACCGGGTCGCGTGT-2 3712 9472 3  
Donor1-ACACCGGTCGCCATAA-2 1218 3964 8  
Donor1-ACAGCCGAGTGTTTGC-2 2486 4727 4  
Donor1-ACAGCCGCAATAACGA-2 1307 4972 8  
Donor1-ACAGCCGCACCGCTAG-2 1253 3485 8  
Donor1-ACAGCCGTCAACGAAA-2 2125 6837 6  
Donor1-ACAGCCGTCCTAAGTG-2 1230 4335 8  
Donor1-ACAGCTAAGGATGTAT-2 3520 8170 2  
Donor1-ACAGCTAGTGCAACGA-2 1952 3722 1  
Donor1-ACATACGAGTAACCCT-2 3363 7668 1  
Donor1-ACATACGTCTGCCCTA-2 1545 5005 7  
Donor1-ACATCAGCAAGGTTCT-2 2492 5182 4  
Donor1-ACATCAGGTACTTCTT-2 1502 4058 13  
Donor1-ACATCAGGTTACGTCA-2 2296 12746 8  
Donor1-ACATCAGGTTACTGAC-2 1939 6126 13  
Donor1-ACATGGTGTCTCGTTC-2 2813 5621 5  
Donor1-ACATGGTTCCTTGCA-2 7528 65994 4  
Donor1-ACCAGTACAACACCTA-2 1351 4009 13  
Donor1-ACCAGTACAAGACGTG-2 1985 10916 8  
Donor1-ACCAGTACAGATCCAT-2 1550 4567 13  
Donor1-ACCAGTAGTATAGGGC-2 4648 14433 1  
Donor1-ACCCACTAGACAAAGG-2 2167 5970 9

|                            |      |       |    |
|----------------------------|------|-------|----|
| Donor1-ACCCACTAGTGGACGT-2  | 1362 | 4813  | 13 |
| Donor1-ACCCACTGTACGACCC-2  | 2022 | 4723  | 4  |
| Donor1-ACCGTAAAGTTTCGCAT-2 | 4057 | 11340 | 1  |
| Donor1-ACCGTAAACATCACAAC-2 | 1377 | 4748  | 8  |
| Donor1-ACCTTTACACCGAATT-2  | 1896 | 8448  | 7  |
| Donor1-ACCTTTAGTACAGCAG-2  | 1089 | 3670  | 8  |
| Donor1-ACGAGCCAGCAGGTCA-2  | 3750 | 10039 | 1  |
| Donor1-ACGAGCCAGGGAACGG-2  | 1503 | 4347  | 13 |
| Donor1-ACGAGCCAGTGCAAGC-2  | 4146 | 22626 | 7  |
| Donor1-ACGAGCCGTTCTGAAC-2  | 4523 | 14640 | 3  |
| Donor1-ACGAGGACAGGGATTG-2  | 1785 | 8154  | 8  |
| Donor1-ACGAGGAGTCTCTCTG-2  | 3486 | 8582  | 3  |
| Donor1-ACGAGGAGTCTGCAAT-2  | 4143 | 11074 | 3  |
| Donor1-ACGAGGAGTTGTTCGCG-2 | 1533 | 3718  | 13 |
| Donor1-ACGAGGATCCCACTTG-2  | 2255 | 7203  | 10 |
| Donor1-ACGAGGATCGGTCCGA-2  | 4827 | 14435 | 3  |
| Donor1-ACGATACCAATCTGCA-2  | 2834 | 5798  | 3  |
| Donor1-ACGATACTCATGTGGT-2  | 5390 | 18599 | 1  |
| Donor1-ACGATGTAGTGTGGCA-2  | 1256 | 4524  | 8  |
| Donor1-ACGATGTGTACTTAGC-2  | 3283 | 7888  | 3  |
| Donor1-ACGCAGCAGTGGAGAA-2  | 8092 | 50385 | 6  |
| Donor1-ACGCAGCCATTCTTAC-2  | 5706 | 18861 | 4  |
| Donor1-ACGCAGCTCCCTCAGT-2  | 1781 | 6944  | 8  |
| Donor1-ACGCAGCTCTGATTCT-2  | 4946 | 15683 | 1  |
| Donor1-ACGCCAGGTCGCCATG-2  | 2096 | 7846  | 9  |
| Donor1-ACGCCAGGTGCCTGGT-2  | 2233 | 6971  | 7  |
| Donor1-ACGCCAGTCCCAAGAT-2  | 6547 | 34250 | 4  |
| Donor1-ACGCCGAAGTGACTCT-2  | 1680 | 7734  | 8  |
| Donor1-ACGCCGACAGATAATG-2  | 3419 | 7835  | 3  |
| Donor1-ACGCCGAGTCGAATCT-2  | 1710 | 6577  | 9  |
| Donor1-ACGCCGAGTTCCCGAG-2  | 3595 | 7979  | 3  |
| Donor1-ACGGAGAGTCTCATCC-2  | 4167 | 9925  | 2  |
| Donor1-ACGGCCAAGGCTCTTA-2  | 1347 | 3562  | 7  |
| Donor1-ACGGCCAGTCAGAAGC-2  | 3169 | 7050  | 2  |
| Donor1-ACGGGCTCAAGTTCTG-2  | 3582 | 9389  | 10 |
| Donor1-ACGGGCTCACTTAAGC-2  | 1277 | 4119  | 8  |
| Donor1-ACGGGCTGTCTAAAGA-2  | 1757 | 3863  | 6  |
| Donor1-ACGGGCTTCAGTTAGC-2  | 1511 | 4478  | 7  |
| Donor1-ACGGGCTTCCTAGAAC-2  | 3833 | 10615 | 2  |
| Donor1-ACGGGCTTCGGTGTTA-2  | 3645 | 9212  | 3  |
| Donor1-ACGGGTCCACGAAGCA-2  | 3923 | 10378 | 2  |
| Donor1-ACGGGTTCGTGCCTGCA-2 | 1420 | 5755  | 8  |
| Donor1-ACGGGTCTCGTATCAG-2  | 1991 | 8466  | 8  |
| Donor1-ACGTCAAAGAAGCCCA-2  | 3761 | 9057  | 5  |
| Donor1-ACGTCAAAGTAGGTGC-2  | 1444 | 4295  | 13 |
| Donor1-ACGTCAACATGGAATA-2  | 3901 | 9918  | 2  |
| Donor1-ACGTCAAGTAAACCTC-2  | 3034 | 6861  | 3  |
| Donor1-ACGTCAAGTAGCTAAA-2  | 3141 | 7162  | 3  |
| Donor1-ACGTCAAGTCTAACGT-2  | 4329 | 11615 | 2  |
| Donor1-ACTATCTGTAAATGTG-2  | 3063 | 6683  | 4  |
| Donor1-ACTGAACAGAAGATTC-2  | 4390 | 12409 | 5  |
| Donor1-ACTGAACGTCTGGAGA-2  | 3155 | 7522  | 6  |
| Donor1-ACTGAACGTTGCTCCT-2  | 2512 | 11114 | 7  |
| Donor1-ACTGAACTCACGGTTA-2  | 2678 | 6075  | 3  |
| Donor1-ACTGAGTAGCACGCCT-2  | 1529 | 4690  | 13 |
| Donor1-ACTGAGTAGGAATGGA-2  | 3638 | 7724  | 5  |



Donor1-ACTGAGTAGGATGCGT-2 2568 4547 2  
Donor1-ACTGATGAGTGATCGG-2 3161 7503 2  
Donor1-ACTGATGAGTGTCCCG-2 2575 5482 2  
Donor1-ACTGATGCACTTACGA-2 2454 7349 10  
Donor1-ACTGATGTCACTTACT-2 1870 6283 9  
Donor1-ACTGATGTCCAAACAC-2 1383 4677 8  
Donor1-ACTGCTCGTCCCTACT-2 6763 25848 1  
Donor1-ACTGTCCGTACCGAGA-2 3246 8224 3  
Donor1-ACTGTCCCTCAGCAACT-2 1484 4912 8  
Donor1-ACTGTCCCTCATATCGG-2 4506 14079 1  
Donor1-ACTGTCCCTCTCTGTCG-2 2884 6163 6  
Donor1-ACTTACTAGGGATGGG-2 2901 6399 2  
Donor1-ACTTACTCACTTCGAA-2 2228 5717 11  
Donor1-ACTTACTCAGTAAGCG-2 2030 7209 9  
Donor1-ACTTACTGTCTCAACA-2 3088 6825 3  
Donor1-ACTTACTTCAGCTCGG-2 2999 9397 10  
Donor1-ACTTACTTCCCTCTTT-2 2317 6038 6  
Donor1-ACTTACTTCCGAACGC-2 2612 9348 10  
Donor1-ACTTGTTAGTCCGTAT-2 2355 12284 8  
Donor1-ACTTGTTGTCCCGACA-2 6229 22499 3  
Donor1-ACTTGTTTCCCTAATT-2 2008 6561 13  
Donor1-ACTTGTTTCGAATGGG-2 1713 4991 13  
Donor1-ACTTTCACAAGGTTTC-2 2675 5207 3  
Donor1-ACTTTCAGTCTTCAAG-2 1839 7726 8  
Donor1-ACTTTCATCTGCAAGT-2 5637 20269 2  
Donor1-AGAATAGCAGTATAAG-2 3057 6786 2  
Donor1-AGAATAGCAGTCTTCC-2 1762 5735 7  
Donor1-AGAATAGCAGTTCATG-2 2705 13495 7  
Donor1-AGAATAGGTCACCCAG-2 3463 14387 7  
Donor1-AGAATAGTCACCTCGT-2 2432 9082 10  
Donor1-AGAATAGTCCCAAGAT-2 4928 16940 2  
Donor1-AGACGTTGTAAACACA-2 4427 20571 6  
Donor1-AGAGCGAAGTACGTTC-2 5258 16629 3  
Donor1-AGAGCGACAAAGTCAA-2 3076 8005 3  
Donor1-AGAGCGACACAGCCCA-2 2481 13945 8  
Donor1-AGAGCGACATCGATTG-2 2435 12327 8  
Donor1-AGAGCTTCAATAGAGT-2 3459 12783 6  
Donor1-AGAGCTTGTAGAGCTG-2 4065 10317 1  
Donor1-AGAGCTTCCACTGGG-2 2092 8287 9  
Donor1-AGAGCTTCCGTCATC-2 1419 5366 8  
Donor1-AGAGTGGAGGGATCTG-2 1487 5361 8  
Donor1-AGATCTGCATACGCTA-2 1632 3958 13  
Donor1-AGATCTGCATGAACCT-2 2405 9117 7  
Donor1-AGATCTGGTTCATGGT-2 1933 5677 13  
Donor1-AGATCTGTCCTATGTT-2 4246 9781 5  
Donor1-AGATTGCAGGATGCGT-2 1869 4062 11  
Donor1-AGATTGCCACTGAAGG-2 3020 6423 6  
Donor1-AGATTGCTCAAACAAG-2 2067 9038 8  
Donor1-AGCAGCCAGTCCCTCCT-2 1788 7425 8  
Donor1-AGCAGCCCATGTTGAC-2 3743 10286 1  
Donor1-AGCATACCAAGGACAC-2 5707 31374 5  
Donor1-AGCATACTCCATGCTC-2 2341 7472 13  
Donor1-AGCATACTCTCACATT-2 5692 22265 6  
Donor1-AGCCTAACATGCTAGT-2 2828 5557 2  
Donor1-AGCGGTCAGAGCTATA-2 1908 5621 7  
Donor1-AGCGGTCTCTCGTATT-2 2410 13166 8

Donor1-AGCGTATAGAGTACAT-2 3101 7163 3  
Donor1-AGCGTATAGCGGATCA-2 1208 4264 8  
Donor1-AGCGTATTCGCATGAT-2 2149 10479 8  
Donor1-AGCGTCGAGATGGGTC-2 5404 18529 1  
Donor1-AGCGTCGGTTCGGTCT-2 2035 3740 3  
Donor1-AGCGTCGTCAGAGCTT-2 2328 4095 6  
Donor1-AGCGTCGTCTTGTATC-2 2048 4636 3  
Donor1-AGCTCCTCAACACCCG-2 4799 32187 7  
Donor1-AGCTCCTCACCAGGCT-2 1289 3654 8  
Donor1-AGCTCCTCAGGCTCAC-2 3036 6643 3  
Donor1-AGCTCCTGTGGGTATG-2 3545 7837 4  
Donor1-AGCTCCTTCATATCGG-2 1539 4744 7  
Donor1-AGCTCTCCATGAGCGA-2 4115 10751 6  
Donor1-AGCTCTCCATGCAACT-2 1784 5859 7  
Donor1-AGCTCTCGTGAACCTT-2 2938 8512 12  
Donor1-AGGCCACTCGGTCCGA-2 1645 7210 8  
Donor1-AGGCCGTCACTTAACG-2 1433 4055 7  
Donor1-AGGCCGTGTATTTCGTG-2 1076 3540 8  
Donor1-AGGCCGTTCCTTTCGG-2 1359 3906 13  
Donor1-AGGGAGTAGATAGGAG-2 1098 3465 7  
Donor1-AGGGAGTCAATGGAAT-2 1303 5275 8  
Donor1-AGGGAGTGTCACTTCC-2 2187 6364 10  
Donor1-AGGGAGTGTTTAAGCC-2 3394 22909 7  
Donor1-AGGGAGTTCTTGAGGT-2 2102 4532 6  
Donor1-AGGGATGCACGTGAGA-2 2033 5505 10  
Donor1-AGGGATGTCGAACTGT-2 3524 11760 9  
Donor1-AGGGTGAAGGGAAACA-2 2669 6510 6  
Donor1-AGGTCATGTGATGTGG-2 3875 10238 3  
Donor1-AGGTCATGTTACGCGC-2 2793 8013 5  
Donor1-AGGTCCGCAAAGCGGT-2 3308 8026 1  
Donor1-AGGTCCGGTCTAAACC-2 2151 5768 13  
Donor1-AGGTCCGGTGCCTGCA-2 1874 8839 8  
Donor1-AGTAGTCCAGACAAGC-2 1756 6311 13  
Donor1-AGTAGTCCATAGAAAC-2 1554 4618 8  
Donor1-AGTCTTTAGGAGTACC-2 2060 6772 7  
Donor1-AGTCTTTCATGCATGT-2 3590 10695 6  
Donor1-AGTCTTTTCTATCGCC-2 3052 6669 3  
Donor1-AGTCTTTTCTGGTATG-2 1439 3711 13  
Donor1-AGTCTTTTCTTCGGTC-2 2624 5559 1  
Donor1-AGTGAGGCACTGCCAG-2 3354 7397 3  
Donor1-AGTGAGGTCTGATTCT-2 2468 7482 10  
Donor1-AGTGGGATCGGCTTGG-2 1859 4976 13  
Donor1-AGTGGGATCGGTCTAA-2 2914 6139 2  
Donor1-AGTGTCAGTCTAGCCG-2 2947 6476 3  
Donor1-AGTGTCATCCCTAACC-2 2799 9202 10  
Donor1-AGTTGGTAGACAATAC-2 2333 4672 5  
Donor1-AGTTGGTCACGAGAGT-2 1436 4184 13  
Donor1-ATAAGAGCATGCGCAC-2 4153 12780 6  
Donor1-ATAGACCAGGTAGCTG-2 4646 13764 5  
Donor1-ATAGACCCATGGTCAT-2 4435 15373 6  
Donor1-ATAGACCTCGCTTAGA-2 3479 12298 4  
Donor1-ATCACGAAGAAGGCCT-2 6058 27752 4  
Donor1-ATCATCTAGAACAATC-2 1596 5709 13  
Donor1-ATCATCTAGGGATACC-2 2266 4318 5  
Donor1-ATCATCTCATGAGCGA-2 4914 45026 7  
Donor1-ATCATCTGTTATCACG-2 3548 8755 3

Donor1-ATCATGGCACCACGTG-2 5299 19495 1  
Donor1-ATCATGGCACCTATCC-2 3529 8364 3  
Donor1-ATCATGGCATAAGACA-2 6608 25303 1  
Donor1-ATCCACCGTAAGGATT-2 2404 6105 6  
Donor1-ATCCACCGTAGCTCCG-2 1648 4110 7  
Donor1-ATCCGAACAGACGCAA-2 1270 4564 8  
Donor1-ATCCGAAGTTAAGATG-2 1473 3902 13  
Donor1-ATCCGAATCATTCACT-2 2447 5392 12  
Donor1-ATCCGAATCCCCTTG-2 3733 10001 2  
Donor1-ATCGAGTAGCGATCCC-2 5320 22724 4  
Donor1-ATCGAGTAGGCGTACA-2 1900 5720 13  
Donor1-ATCGAGTCACTTAACG-2 4409 12661 3  
Donor1-ATCTACTAGACGCTTT-2 1481 4342 13  
Donor1-ATCTACTGTCCGAGTC-2 1486 4375 8  
Donor1-ATCTACTTCCTTGCCA-2 3724 8789 1  
Donor1-ATCTGCCAGACAAGCC-2 1666 5432 13  
Donor1-ATCTGCCCAAGAGGCT-2 2256 3758 6  
Donor1-ATCTGCCCACATTAGC-2 2730 5577 1  
Donor1-ATGAGGGCATAGGATA-2 1732 7669 8  
Donor1-ATGAGGGGTTAGATGA-2 2041 4077 6  
Donor1-ATGCGATCACACATGT-2 1884 5525 6  
Donor1-ATGGGAGAGACATAAC-2 3627 13438 6  
Donor1-ATGTGTGAGGATGTAT-2 1909 6959 9  
Donor1-ATGTGTGAGTACCGGA-2 4913 16279 1  
Donor1-ATTACTCCAAGGACAC-2 3059 7141 3  
Donor1-ATTACTCGTAAATGAC-2 2704 5297 2  
Donor1-ATTACTCGTGATGTCT-2 3123 7054 3  
Donor1-ATTATCCCATCATCCC-2 5184 16051 3  
Donor1-ATTATCCGTCTCGTTC-2 6328 33794 6  
Donor1-ATTATCCGTGCGAAAC-2 2423 5367 3  
Donor1-ATTATCCTCCTTTACA-2 2012 9843 8  
Donor1-ATTGGACAGGTAAACT-2 1306 4168 8  
Donor1-ATTGGACGTCGAGATG-2 2139 4193 3  
Donor1-ATTGGTGTCATGCAAC-2 2865 9204 11  
Donor1-ATTGGTGCTTGTTTG-2 1535 5614 8  
Donor1-ATTTCTGAGGCGACAT-2 6479 28345 3  
Donor1-CAACCAAAGCGTCAAG-2 1721 7027 8  
Donor1-CAACCAAGTTGAGTTC-2 1124 3649 8  
Donor1-CAACCTCAGATGTCGG-2 1986 7258 9  
Donor1-CAACCTCCAGGACCCT-2 4101 9229 1  
Donor1-CAACCTCCATACGCTA-2 3440 10611 6  
Donor1-CAACCTCGTCGACTGC-2 2058 4265 10  
Donor1-CAACCTCCTCAACC-2 2039 5427 10  
Donor1-CAACTAGCAATGAATG-2 4412 13298 4  
Donor1-CAACTAGGTCTGGTCG-2 9312 79594 6  
Donor1-CAAGAAACACGCTTTC-2 2325 4038 6  
Donor1-CAAGAAACAGCTATTG-2 2890 12027 6  
Donor1-CAAGAAACATCCCATC-2 2687 9528 10  
Donor1-CAAGAAATCACTCCTG-2 2545 5511 3  
Donor1-CAAGAAATCAGTCCCT-2 4376 12450 3  
Donor1-CAAGATCCAAGTACCT-2 5541 18008 1  
Donor1-CAAGATCCACCACCAG-2 1568 4921 7  
Donor1-CAAGATCGTCTTCTCG-2 2137 5801 6  
Donor1-CAAGATCGTTTACTCT-2 3792 8341 3  
Donor1-CAAGATCTCGGATGTT-2 2452 7114 13  
Donor1-CAAGATCTCTCGGACG-2 4122 11439 3

Donor1-CAAGGCCAGCCCAATT-2 6996 33161 1  
Donor1-CAAGGCCGTACCAGTT-2 2464 9849 7  
Donor1-CAAGGCCGTTCCGGCA-2 1495 4714 8  
Donor1-CAAGTTGAGTAAGTAC-2 3457 11616 11  
Donor1-CAAGTTGCATAAAGGT-2 5690 19831 3  
Donor1-CAAGTTGTCGCTTAGA-2 4968 16999 6  
Donor1-CACACAACAAGTAATG-2 4870 12347 2  
Donor1-CACACAACACATCCAA-2 2395 6334 10  
Donor1-CACACCTCAAACAACA-2 1378 3783 13  
Donor1-CACACCTGTCCGAACC-2 2243 7203 7  
Donor1-CACACCTTCCACGACG-2 2529 4049 5  
Donor1-CACACTCCATCGGACC-2 2504 4963 1  
Donor1-CACACTCGTCATGCCG-2 5578 18052 5  
Donor1-CACACTCGTCTCTTTA-2 6211 22673 1  
Donor1-CACACTCGTCTTCAAG-2 2021 4059 4  
Donor1-CACAGGCTCCGCGCAA-2 5124 14398 3  
Donor1-CACAGTAAGCTCAACT-2 2398 10465 9  
Donor1-CACAGTAGTTAAGACA-2 1571 4733 7  
Donor1-CACAGTATCAGAGACG-2 1179 3657 8  
Donor1-CACAGTATCATTGCGA-2 4129 10592 4  
Donor1-CACATAGAGTGGGATC-2 5827 23967 4  
Donor1-CACATTTAGGAATCGC-2 3547 9070 6  
Donor1-CACATTTGTCTCCACT-2 1607 4409 9  
Donor1-CACCACTAGACTAGAT-2 3334 8038 3  
Donor1-CACCACTAGTCTCCTC-2 8960 64516 6  
Donor1-CACCACTCAGGTCGTC-2 3621 8907 3  
Donor1-CACCACTGTAGCGCAA-2 4459 13682 4  
Donor1-CACCACTGTATGAATG-2 1390 4557 8  
Donor1-CACCACTTCAGTTTGG-2 3042 6870 2  
Donor1-CACCAGGAGGTCGGAT-2 4732 15713 2  
Donor1-CACCAGGCAAGCGATG-2 1427 4355 13  
Donor1-CACCAGGCAATGGAAT-2 7091 47663 4  
Donor1-CACCAGGCAGCTTCGG-2 3597 9364 1  
Donor1-CACCAGGGTATTAGCC-2 1879 7022 7  
Donor1-CACCTTGAGCGTTGCC-2 4400 13394 2  
Donor1-CACCTTGTCGGTCCGA-2 1402 4950 7  
Donor1-CACCTTGTCTAACTGG-2 2566 14007 7  
Donor1-CACTCCAAGCCGTCGT-2 3098 6591 2  
Donor1-CACTCCAGTCGCCATG-2 3284 7382 2  
Donor1-CACTCCAGTCTCACCT-2 2972 5531 5  
Donor1-CACTCCAGTGGTAACG-2 3347 8845 3  
Donor1-CACTCCAGTGTAATGA-2 3057 18241 7  
Donor1-CACTCCATCATAGCAC-2 3046 6524 2  
Donor1-CACTCCATCATGTCTT-2 4743 17446 2  
Donor1-CAGAATCCAATGTAAG-2 2827 10646 8  
Donor1-CAGAATCCATTAGCCA-2 2413 13689 8  
Donor1-CAGAATCGTGTTTGTG-2 3698 9208 4  
Donor1-CAGAGAGAGTTTCCTT-2 5017 15466 2  
Donor1-CAGAGAGCAAGACGTG-2 4591 13168 6  
Donor1-CAGAGAGTCATCGCTC-2 3549 9379 3  
Donor1-CAGATCAAGACGCAAC-2 4914 14361 4  
Donor1-CAGATCATCTCATTCA-2 2474 7416 13  
Donor1-CAGCAGCCAATGGACG-2 993 3813 8  
Donor1-CAGCAGCTCACTTATC-2 1212 4049 8  
Donor1-CAGCATACACGAGGTA-2 1250 3869 8  
Donor1-CAGCCGAAGGGATACC-2 1507 4932 7

Donor1-CAGCCGACAATTCCTT-2 1589 5758 8  
Donor1-CAGCCGAGTCACCCAG-2 3375 8337 3  
Donor1-CAGCCGATCCTTGACC-2 1962 6614 7  
Donor1-CAGCCGATCTTGCAAG-2 3137 5954 5  
Donor1-CAGCGACGTAGGCTGA-2 1670 4830 6  
Donor1-CAGCTAACAGACAGGT-2 6313 27780 1  
Donor1-CAGCTAAGTCCCTACT-2 2926 6507 3  
Donor1-CAGCTGGGTTTGTGG-2 7796 39180 5  
Donor1-CAGCTGGTCACAGGCC-2 2331 4665 3  
Donor1-CAGCTGGTCGTCACGG-2 2815 5532 2  
Donor1-CAGGTGCAGACCGGAT-2 3389 7978 1  
Donor1-CAGTAACCAACAACCT-2 2469 4692 3  
Donor1-CAGTAACCAGACGCCT-2 6845 38306 4  
Donor1-CATATGGCAGCGAACA-2 3433 8761 1  
Donor1-CATATTCAGTTTCCTT-2 2120 4048 3  
Donor1-CATATTCACCCATGG-2 2275 8995 7  
Donor1-CATATTCGTCTTCAAG-2 5984 22772 1  
Donor1-CATATTCGTGCACGAA-2 5698 17908 2  
Donor1-CATCAAGAGCCGGTAA-2 2775 5838 4  
Donor1-CATCAAGCAATGGTCT-2 1677 6144 8  
Donor1-CATCAAGTCATCTGCC-2 1480 4799 8  
Donor1-CATCAGAGTCTCGTTC-2 2465 5279 1  
Donor1-CATCAGAGTTGGAGGT-2 1402 4364 13  
Donor1-CATCCACCATGGGAAC-2 3408 8244 3  
Donor1-CATCCACTCACCGTAA-2 2466 10698 9  
Donor1-CATCCACTCGCCGTGA-2 2361 6507 10  
Donor1-CATCGAAAGCTTATCG-2 1185 4192 8  
Donor1-CATCGAATCCCAAGAT-2 3766 9807 3  
Donor1-CATCGGGAGCAGACTG-2 2279 10559 8  
Donor1-CATCGGGTCGTTTATC-2 5425 18726 2  
Donor1-CATCGGGTCTTGAGAC-2 3289 7320 1  
Donor1-CATGACAAGAATTGTG-2 3121 6732 4  
Donor1-CATGACATCAGAGGTG-2 3776 14071 12  
Donor1-CATGCCTAGATCTGCT-2 2085 7601 9  
Donor1-CATGCCTAGGTGACCA-2 3931 10842 3  
Donor1-CATGCCTCAATAGCAA-2 1650 4764 7  
Donor1-CATGCCTGTGGCGAAT-2 4390 12870 12  
Donor1-CATGGCGCAGACAAAT-2 6618 36433 4  
Donor1-CATGGCGGTACAGCAG-2 4489 12941 1  
Donor1-CATGGCGTCCACTGGG-2 1624 6488 8  
Donor1-CATTATCAGCGGCTTC-2 3001 7252 4  
Donor1-CATTATCAGTGTTAGA-2 5422 19981 2  
Donor1-CATTATCCAGGAACGT-2 3541 6675 5  
Donor1-CATTATCCAGTCTTCC-2 6667 37501 4  
Donor1-CATTTCGACGCTCTCGG-2 6261 24191 3  
Donor1-CATTTCGACGTACGCC-2 1707 4871 13  
Donor1-CATTTCGCCAGTCACTA-2 3606 8187 2  
Donor1-CATTTCGCTCTGATCA-2 4187 11881 4  
Donor1-CATTTCGCTTAGTGGG-2 1598 4461 13  
Donor1-CATTTCGCTTGCGCAC-2 2468 4832 2  
Donor1-CCAATCCAGCTGAACG-2 2870 5780 6  
Donor1-CCAATCCAGTAATCCC-2 3828 8772 3  
Donor1-CCAATCCGTATGAAAC-2 2664 4495 6  
Donor1-CCAATCCTCTGGTTC-2 1159 3511 8  
Donor1-CCACCTAAGATCACGG-2 1866 7658 7  
Donor1-CCACCTAGTTCCAACA-2 3078 6166 2

|                            |      |       |    |
|----------------------------|------|-------|----|
| Donor1-CCACCTATCGGAAACG-2  | 2801 | 9062  | 11 |
| Donor1-CCACGGACACTCGACG-2  | 2242 | 3727  | 5  |
| Donor1-CCACTACAGTACGCCC-2  | 3538 | 8888  | 3  |
| Donor1-CCACTACGTAGAGCTG-2  | 1510 | 4081  | 13 |
| Donor1-CCACTACGTCCCTCTTG-2 | 3767 | 8650  | 3  |
| Donor1-CCACTACTCATCGATG-2  | 2205 | 4328  | 1  |
| Donor1-CCACTACTCCCTCAGT-2  | 1246 | 3916  | 8  |
| Donor1-CCAGCGAAGGGTTCCC-2  | 3027 | 5870  | 5  |
| Donor1-CCAGCGAGTCGATTGT-2  | 1531 | 4654  | 7  |
| Donor1-CCAGCGATCCAAATGC-2  | 7006 | 34181 | 4  |
| Donor1-CCAGCGATCTGTCAAG-2  | 4794 | 13081 | 3  |
| Donor1-CCATGTCAGAAAGTGG-2  | 4438 | 11580 | 2  |
| Donor1-CCATGTCCAAGCGCTC-2  | 2016 | 3783  | 2  |
| Donor1-CCATGTTCGTATCAGTC-2 | 3001 | 6618  | 4  |
| Donor1-CCATGTTCGTTGCGCAC-2 | 7452 | 49921 | 2  |
| Donor1-CCATTCGCACATGACT-2  | 2322 | 10768 | 8  |
| Donor1-CCATTCGCACGTCTCT-2  | 2565 | 10249 | 9  |
| Donor1-CCATTCGTCATTATCC-2  | 1944 | 5764  | 6  |
| Donor1-CCATTCGTCCATTCTA-2  | 5349 | 19567 | 5  |
| Donor1-CCCAATCGTCTAAACC-2  | 1403 | 3479  | 7  |
| Donor1-CCCAATCTCGAGCCCA-2  | 1172 | 3915  | 8  |
| Donor1-CCCAGTTAGGTGATAT-2  | 3089 | 7066  | 3  |
| Donor1-CCCAGTTAGTTAAGTG-2  | 3265 | 8338  | 1  |
| Donor1-CCCAGTTGTCTCCACT-2  | 1221 | 3861  | 8  |
| Donor1-CCCATACAGTCAAGCG-2  | 4257 | 13906 | 6  |
| Donor1-CCCATACCACATTTCT-2  | 4268 | 11007 | 6  |
| Donor1-CCCATACTCCACTCCA-2  | 3795 | 9286  | 3  |
| Donor1-CCCTCCTAGGAATGGA-2  | 2162 | 7911  | 7  |
| Donor1-CCGGGATCATGCCACG-2  | 2127 | 8111  | 7  |
| Donor1-CCGGGATGTGTTTGTG-2  | 1559 | 6946  | 8  |
| Donor1-CCGGTAGAGGCCATAG-2  | 3424 | 9676  | 1  |
| Donor1-CCGGTAGCATGCCACG-2  | 3026 | 13299 | 7  |
| Donor1-CCGTACTGTACGCTGC-2  | 2592 | 4519  | 6  |
| Donor1-CCGTGGACAAGTCATC-2  | 3546 | 15278 | 7  |
| Donor1-CCGTGGAGTAAGTTCC-2  | 4304 | 10612 | 6  |
| Donor1-CCGTGGAGTATTAGCC-2  | 3356 | 8233  | 4  |
| Donor1-CCGTTCAAGATGAGAG-2  | 1193 | 4423  | 8  |
| Donor1-CCGTTCAAGCTGTTCA-2  | 1045 | 3487  | 8  |
| Donor1-CCGTTCAAGGAGTTTA-2  | 3818 | 8268  | 1  |
| Donor1-CCGTTCAAGTGCTGCC-2  | 5733 | 19046 | 1  |
| Donor1-CCGTTACAATTGCTG-2   | 2906 | 14909 | 7  |
| Donor1-CCGTTACATCGACGC-2   | 2602 | 9291  | 13 |
| Donor1-CCGTTCAGTATAGGTA-2  | 2129 | 3874  | 5  |
| Donor1-CCTAAAGTCAAACCGT-2  | 4605 | 11798 | 5  |
| Donor1-CCTAAAGTCAGGTTCA-2  | 1215 | 4071  | 8  |
| Donor1-CCTAAAGTCGTGGTCG-2  | 3752 | 8487  | 2  |
| Donor1-CCTACACCAGTACACT-2  | 1871 | 5305  | 7  |
| Donor1-CCTAGCTAGAGTCGGT-2  | 1560 | 4835  | 13 |
| Donor1-CCTAGCTAGTGGAGTC-2  | 4246 | 12022 | 2  |
| Donor1-CCTAGCTCACATCCGG-2  | 1986 | 4688  | 10 |
| Donor1-CCTAGCTCATTACCTT-2  | 2088 | 9913  | 8  |
| Donor1-CCTAGCTGTAGAAAGG-2  | 3046 | 6654  | 3  |
| Donor1-CCTAGCTGTATTACCG-2  | 2035 | 3506  | 6  |
| Donor1-CCTAGCTGTTGCGCAC-2  | 4579 | 14350 | 3  |
| Donor1-CCTATTAAGAAAGTGG-2  | 4895 | 16017 | 2  |
| Donor1-CCTATTAAGTACACCT-2  | 1390 | 5636  | 8  |

|                            |      |       |    |
|----------------------------|------|-------|----|
| Donor1-CCTATTAGTAAATACG-2  | 1669 | 4865  | 13 |
| Donor1-CCTATTAGTCCAGTAT-2  | 3322 | 7587  | 4  |
| Donor1-CCTCAGTTCCTTTCGG-2  | 4228 | 10990 | 4  |
| Donor1-CCTCAGTTCGGCGGTT-2  | 5473 | 20826 | 1  |
| Donor1-CCTCTGAGTCCGCTGA-2  | 2280 | 4605  | 2  |
| Donor1-CCTCTGATCCAAACAC-2  | 6355 | 29594 | 6  |
| Donor1-CCTCTGATCCTTTCTC-2  | 3858 | 10051 | 3  |
| Donor1-CCTTACGAGCGTGTCC-2  | 1321 | 3889  | 7  |
| Donor1-CCTTACGCATCCAACA-2  | 2088 | 7352  | 9  |
| Donor1-CCTTACGGTAGGGACT-2  | 1543 | 6136  | 8  |
| Donor1-CCTTACGTCTGGTATG-2  | 1467 | 4037  | 13 |
| Donor1-CCTTCCCAGGTGCTTT-2  | 2261 | 6435  | 4  |
| Donor1-CCTTCCCCAAGACGTG-2  | 1624 | 3754  | 10 |
| Donor1-CCTTCCCCAGCCAATT-2  | 1940 | 11155 | 8  |
| Donor1-CCTTCGAGTACCTACA-2  | 1977 | 7749  | 9  |
| Donor1-CCTTTCTTCAGTTGAC-2  | 2200 | 4055  | 4  |
| Donor1-CGAACATTCTGATTCT-2  | 6774 | 25458 | 1  |
| Donor1-CGACCTTAGAGACGAA-2  | 1761 | 8133  | 8  |
| Donor1-CGACCTTCAAGTCTAC-2  | 2888 | 8333  | 11 |
| Donor1-CGACCTTGTAGCGTCC-2  | 1520 | 6231  | 8  |
| Donor1-CGACCTTGTTTCATGGT-2 | 2139 | 10679 | 8  |
| Donor1-CGACCTTGTTCTCATT-2  | 6874 | 29806 | 5  |
| Donor1-CGACCTTCCAGATCA-2   | 1873 | 3894  | 1  |
| Donor1-CGACTTCCACTGTCGG-2  | 6722 | 33950 | 4  |
| Donor1-CGACTTCGTGGCTCCA-2  | 1366 | 3570  | 7  |
| Donor1-CGACTTCGTGGTCTCG-2  | 4582 | 18166 | 6  |
| Donor1-CGAGAAGAGAAGATTC-2  | 5848 | 25678 | 4  |
| Donor1-CGAGAAGAGCGCTTAT-2  | 1520 | 4905  | 13 |
| Donor1-CGAGAAGCAACTGGCC-2  | 3411 | 7229  | 5  |
| Donor1-CGAGAAGCAATGAAAC-2  | 4655 | 15244 | 5  |
| Donor1-CGAGAAGCACCTCGTT-2  | 1293 | 4043  | 13 |
| Donor1-CGAGAAGGTGAAAGAG-2  | 1139 | 3601  | 8  |
| Donor1-CGAGAAGGTTCCCGAG-2  | 1333 | 5244  | 8  |
| Donor1-CGAGAAGTCACCTCGT-2  | 1734 | 8811  | 8  |
| Donor1-CGAGCACAGATGGGTC-2  | 1545 | 5438  | 13 |
| Donor1-CGAGCACC AATCCAAC-2 | 4746 | 14187 | 1  |
| Donor1-CGAGCCAAGATGCGAC-2  | 3059 | 6614  | 3  |
| Donor1-CGAGCCAGTCGCGAAA-2  | 4169 | 12588 | 1  |
| Donor1-CGAGCCAGTGGTCCGT-2  | 1932 | 8848  | 8  |
| Donor1-CGAGCCATCCTGCCAT-2  | 2362 | 10068 | 9  |
| Donor1-CGATCGGCACGGCCAT-2  | 2769 | 6518  | 3  |
| Donor1-CGATCGGGTAAATGAC-2  | 1587 | 6397  | 8  |
| Donor1-CGATGGCAGGGATCTG-2  | 6536 | 29864 | 5  |
| Donor1-CGATGGCCAGACAAAT-2  | 2018 | 7455  | 9  |
| Donor1-CGATGTAAGGACACCA-2  | 2301 | 7195  | 10 |
| Donor1-CGATGTACAAGCTGAG-2  | 4636 | 13909 | 2  |
| Donor1-CGATTGAGTTCAACCA-2  | 4422 | 10395 | 3  |
| Donor1-CGATTGATCCACTCCA-2  | 5397 | 17095 | 3  |
| Donor1-CGCCAAGCAAACGCGA-2  | 1254 | 4084  | 8  |
| Donor1-CGCCAAGCAATAAGCA-2  | 7104 | 41095 | 4  |
| Donor1-CGCGGTACACTGCCAG-2  | 3198 | 7878  | 2  |
| Donor1-CGCGGTAGTCTGGAGA-2  | 1318 | 4510  | 8  |
| Donor1-CGCGGTAGTTGCTCCT-2  | 3401 | 7338  | 3  |
| Donor1-CGCGTTTTAGATATGCA-2 | 4392 | 14046 | 2  |
| Donor1-CGCGTTTTACATGGGA-2  | 5237 | 16670 | 2  |
| Donor1-CGCGTTTTACACCACCT-2 | 5028 | 16354 | 3  |

|                            |      |       |    |
|----------------------------|------|-------|----|
| Donor1-CGCTATCAGGGCTCTC-2  | 4871 | 15074 | 1  |
| Donor1-CGCTATCCATCTCGCT-2  | 1692 | 4502  | 10 |
| Donor1-CGCTATCTCTGCCCTA-2  | 2409 | 4707  | 2  |
| Donor1-CGCTGGAAGTACGTAA-2  | 1508 | 5365  | 13 |
| Donor1-CGCTGGAGTCGCATCG-2  | 3973 | 10996 | 2  |
| Donor1-CGCTTCAAGCAGATCG-2  | 4355 | 20026 | 6  |
| Donor1-CGCTTCAAGCTGCCCA-2  | 2233 | 4307  | 3  |
| Donor1-CGGACACAGATCCCGC-2  | 2754 | 7330  | 6  |
| Donor1-CGGACACAGCAGGTCA-2  | 1200 | 3700  | 8  |
| Donor1-CGGACACTCTTGAGGT-2  | 1289 | 3697  | 9  |
| Donor1-CGGACGTCAAGCCAC-2   | 2314 | 3731  | 5  |
| Donor1-CGGACGTGTGTATGGG-2  | 2433 | 4995  | 3  |
| Donor1-CGGACGTTCTATCCCG-2  | 3279 | 7470  | 4  |
| Donor1-CGGACTGAGTGGGTTG-2  | 5160 | 18891 | 6  |
| Donor1-CGGAGCTCAATGGTCT-2  | 4444 | 13119 | 2  |
| Donor1-CGGAGTCAGAAGAAGC-2  | 1322 | 3763  | 7  |
| Donor1-CGGAGTCAGTATGACA-2  | 1442 | 5148  | 8  |
| Donor1-CGGAGTCGTAGGCATG-2  | 1606 | 5904  | 13 |
| Donor1-CGGAGTCTCGTCCGTT-2  | 2194 | 7096  | 10 |
| Donor1-CGGCTAGAGAGCTTCT-2  | 5360 | 21037 | 2  |
| Donor1-CGGCTAGAGTCGCCGT-2  | 3669 | 9201  | 6  |
| Donor1-CGGCTAGGTATAGGGC-2  | 2638 | 5246  | 2  |
| Donor1-CGGCTAGGTCCGCACT-2  | 3343 | 8582  | 3  |
| Donor1-CGGGTCACACCGGAAA-2  | 3486 | 8579  | 3  |
| Donor1-CGGTTAAAGGTGATTA-2  | 2337 | 4493  | 3  |
| Donor1-CGGTTAAACAAACCTAC-2 | 1279 | 3585  | 13 |
| Donor1-CGGTTAAGTGAGGGTT-2  | 5054 | 17297 | 5  |
| Donor1-CGGTTAATCACCTCGT-2  | 2545 | 10713 | 7  |
| Donor1-CGTAGCGGTCCTAGCG-2  | 2094 | 5735  | 10 |
| Donor1-CGTAGCGTCACGGTTA-2  | 1246 | 4050  | 8  |
| Donor1-CGTAGCGTCCCTTGTG-2  | 4893 | 13318 | 2  |
| Donor1-CGTAGGCGTAATCACC-2  | 1826 | 5852  | 7  |
| Donor1-CGTAGGCGTCGATTGT-2  | 1466 | 5631  | 8  |
| Donor1-CGTAGGCTCTGCAGTA-2  | 1462 | 4453  | 13 |
| Donor1-CGTCACTAGAGACTTA-2  | 5260 | 16814 | 4  |
| Donor1-CGTCACTGTAGCTCCG-2  | 3971 | 10688 | 1  |
| Donor1-CGTCAGGAGATGGCGT-2  | 1312 | 3792  | 8  |
| Donor1-CGTCAGGAGTAGCGGT-2  | 3443 | 8737  | 1  |
| Donor1-CGTCAGGAGTCTCCTC-2  | 1386 | 3516  | 10 |
| Donor1-CGTCAGGGTAAACACA-2  | 1258 | 4995  | 8  |
| Donor1-CGTCAGGGTCCGTGAC-2  | 2571 | 9580  | 7  |
| Donor1-CGTCCATCATTCTCAT-2  | 4103 | 10353 | 3  |
| Donor1-CGTCCATTCCGGAGCAA-2 | 2900 | 5942  | 4  |
| Donor1-CGTCCATTCTTGCAAG-2  | 1393 | 4954  | 8  |
| Donor1-CGTCTACCACAACGTT-2  | 3605 | 8849  | 1  |
| Donor1-CGTCTACTCCTTTCGG-2  | 2257 | 4777  | 6  |
| Donor1-CGTGAGCGTCCGTGAC-2  | 6003 | 21351 | 2  |
| Donor1-CGTGAGCTCATGGTCA-2  | 3156 | 9056  | 6  |
| Donor1-CGTGTAAAGCCTATGT-2  | 3329 | 7968  | 2  |
| Donor1-CGTGTAACATACTCTT-2  | 2915 | 10966 | 10 |
| Donor1-CGTGTCTCAATGACCT-2  | 2423 | 7145  | 6  |
| Donor1-CGTGTCTCATTTTCAGG-2 | 6749 | 30722 | 6  |
| Donor1-CGTGTCTGTAGAAAGG-2  | 4302 | 20922 | 7  |
| Donor1-CGTGTCTGTGTGAAAT-2  | 6778 | 42389 | 4  |
| Donor1-CGTTAGAAGTTGAGTA-2  | 2611 | 5404  | 3  |
| Donor1-CGTTCTGCATCAGTAC-2  | 1825 | 5730  | 7  |



|                            |      |       |    |
|----------------------------|------|-------|----|
| Donor1-CGTTCTGGTGATAAAC-2  | 7194 | 29606 | 1  |
| Donor1-CGTTCTGTCGCGTTTC-2  | 1412 | 4553  | 7  |
| Donor1-CGTTGGGAGCCAGAAC-2  | 1872 | 6310  | 13 |
| Donor1-CGTTGGGAGCTAGCCC-2  | 2962 | 6922  | 3  |
| Donor1-CGTTGGGAGTGTTGAA-2  | 3265 | 8389  | 1  |
| Donor1-CGTTGGGGTCTCTCTG-2  | 1454 | 5484  | 8  |
| Donor1-CGTTGGGTCCCAGGTG-2  | 1219 | 3738  | 13 |
| Donor1-CTAACTTAGCACAGGT-2  | 1321 | 4270  | 8  |
| Donor1-CTAACTTAGTGAATTG-2  | 2108 | 4417  | 11 |
| Donor1-CTAACTTCAGGGTATG-2  | 1531 | 3457  | 10 |
| Donor1-CTAACTTCATGGATGG-2  | 1790 | 4905  | 13 |
| Donor1-CTAAGACAGGAGTCTG-2  | 2352 | 10496 | 8  |
| Donor1-CTAAGACAGTATCTCG-2  | 1623 | 5547  | 7  |
| Donor1-CTAAGACGTATCAGTC-2  | 6373 | 22940 | 2  |
| Donor1-CTAAGACGTCTACCTC-2  | 3757 | 8418  | 5  |
| Donor1-CTAATGGAGCCTTGAT-2  | 1942 | 5067  | 8  |
| Donor1-CTAATGGCACTGTGTA-2  | 1741 | 4649  | 13 |
| Donor1-CTAATGGCAGTCACTA-2  | 3867 | 9891  | 1  |
| Donor1-CTACACCCAATGGTCT-2  | 3220 | 8469  | 6  |
| Donor1-CTACACCCAGGTCCAC-2  | 1652 | 7032  | 8  |
| Donor1-CTACACCGTCAGATAA-2  | 1647 | 4527  | 13 |
| Donor1-CTACACCTCATCATTC-2  | 2169 | 7467  | 9  |
| Donor1-CTACACCTCTAACGGT-2  | 5427 | 17494 | 1  |
| Donor1-CTACACCTCTGCGGCA-2  | 2456 | 8987  | 10 |
| Donor1-CTACATTAGTCAAGGC-2  | 1302 | 3690  | 7  |
| Donor1-CTACATTCATTTTCAGG-2 | 2194 | 7031  | 10 |
| Donor1-CTACATTGTGCCTGCA-2  | 1496 | 3968  | 13 |
| Donor1-CTACCCAAGTACGACG-2  | 3178 | 7796  | 3  |
| Donor1-CTACCCAGTATTAGCC-2  | 1545 | 3900  | 13 |
| Donor1-CTACCCATCAGTTCGA-2  | 3062 | 6910  | 3  |
| Donor1-CTACGTCAGCTGGAAC-2  | 2933 | 6665  | 3  |
| Donor1-CTACGTCAGGGTCTCC-2  | 2093 | 6669  | 13 |
| Donor1-CTACGTCCACAGATTC-2  | 2438 | 4794  | 2  |
| Donor1-CTACGTCCACTGTCGG-2  | 1650 | 5538  | 13 |
| Donor1-CTACGTCTAGCTCCG-2   | 3419 | 7220  | 5  |
| Donor1-CTACGTCTCCGCATCT-2  | 1910 | 6069  | 13 |
| Donor1-CTAGAGTCAAGTACCT-2  | 1671 | 5295  | 7  |
| Donor1-CTAGAGTCATACAGCT-2  | 1697 | 5504  | 9  |
| Donor1-CTAGCCTCAACGATGG-2  | 3163 | 7136  | 3  |
| Donor1-CTAGCCTTCCTTGGTC-2  | 3946 | 9882  | 3  |
| Donor1-CTAGTGAAGCTAGGCA-2  | 5257 | 15668 | 2  |
| Donor1-CTAGTGACACAGCCCA-2  | 3938 | 14188 | 6  |
| Donor1-CTAGTGATCCTGTACC-2  | 1992 | 9073  | 8  |
| Donor1-CTCACACAGCGATCCC-2  | 5978 | 21055 | 4  |
| Donor1-CTCACACAGTGAATTG-2  | 1521 | 6251  | 8  |
| Donor1-CTCACACCACTGCCAG-2  | 4174 | 11142 | 1  |
| Donor1-CTCACACGTTCCGTCT-2  | 1761 | 4500  | 6  |
| Donor1-CTCACACTCGTTACGA-2  | 1854 | 9895  | 8  |
| Donor1-CTCAGAAAGCTGATAA-2  | 1330 | 5089  | 8  |
| Donor1-CTCATTACACTACAGT-2  | 2406 | 4643  | 2  |
| Donor1-CTCCTAGAGGCTCAGA-2  | 3410 | 7931  | 3  |
| Donor1-CTCCTAGAGTCCTCCT-2  | 1207 | 3778  | 8  |
| Donor1-CTCGAAACAACCTTGAC-2 | 1383 | 4282  | 8  |
| Donor1-CTCGAAAGTTTGTGG-2   | 1647 | 4392  | 7  |
| Donor1-CTCGAGGCACTAAGTC-2  | 3498 | 8692  | 2  |
| Donor1-CTCGAGGGTACAGTGG-2  | 3776 | 8720  | 3  |

|                            |      |       |    |
|----------------------------|------|-------|----|
| Donor1-CTCGAGGGTACCGTAT-2  | 1631 | 5677  | 13 |
| Donor1-CTCGGAGCATAACGCCG-2 | 1384 | 5032  | 8  |
| Donor1-CTCGGAGGTCCCTACT-2  | 4988 | 13821 | 2  |
| Donor1-CTCGGGACACATTAGC-2  | 1389 | 4010  | 9  |
| Donor1-CTCGGGATCCTAGAAC-2  | 1189 | 3541  | 7  |
| Donor1-CTCGTACAGTATGACA-2  | 6341 | 22143 | 1  |
| Donor1-CTCGTACTCAGTCCCT-2  | 3271 | 7431  | 3  |
| Donor1-CTCGTACTCCGCATAA-2  | 2815 | 6093  | 3  |
| Donor1-CTCGTACTCTAACTCT-2  | 2174 | 7998  | 9  |
| Donor1-CTCGTACTCTGTCAAG-2  | 2221 | 4237  | 3  |
| Donor1-CTCGTCAAGCTAAGAT-2  | 4697 | 15368 | 2  |
| Donor1-CTCGTCATCCAGATCA-2  | 5916 | 21047 | 1  |
| Donor1-CTCGTCATCCGAAGAG-2  | 3179 | 7662  | 2  |
| Donor1-CTCTAATCACCAGATT-2  | 3115 | 5611  | 5  |
| Donor1-CTCTAATGTCAAGCGA-2  | 1653 | 4252  | 7  |
| Donor1-CTCTAATGTTTCGCTC-2  | 2027 | 4267  | 10 |
| Donor1-CTCTACGGTTAAAGAC-2  | 1670 | 3567  | 11 |
| Donor1-CTCTGGTCATTTCACT-2  | 3292 | 6607  | 4  |
| Donor1-CTCTGGTGTCTGCAAT-2  | 1102 | 3487  | 8  |
| Donor1-CTGAAACAGATGTGTA-2  | 2732 | 5924  | 3  |
| Donor1-CTGAAACGTCTCGTTC-2  | 5977 | 22361 | 1  |
| Donor1-CTGAAGTAGACAGGCT-2  | 1479 | 3722  | 13 |
| Donor1-CTGAAGTAGACGCTTT-2  | 5395 | 18847 | 3  |
| Donor1-CTGAAGTAGCCAGTTT-2  | 1885 | 6486  | 13 |
| Donor1-CTGAAGTCACGTCTCT-2  | 2422 | 9466  | 9  |
| Donor1-CTGAAGTGTCTTTCAT-2  | 3021 | 9357  | 11 |
| Donor1-CTGAAGTTC AATACCG-2 | 4377 | 12429 | 2  |
| Donor1-CTGAAGTTC AATCACG-2 | 1900 | 3469  | 6  |
| Donor1-CTGATAGCAATCGAAA-2  | 2226 | 5414  | 13 |
| Donor1-CTGATAGGTATAAACG-2  | 2109 | 3944  | 2  |
| Donor1-CTGATAGTCTTGAGGT-2  | 2160 | 9586  | 7  |
| Donor1-CTGATCCAGAGACTTA-2  | 1584 | 5067  | 7  |
| Donor1-CTGATCCAGTGGAGAA-2  | 1977 | 5051  | 13 |
| Donor1-CTGCCTAAGGAGTTGC-2  | 2996 | 6164  | 2  |
| Donor1-CTGCCTACATACTACG-2  | 2511 | 4738  | 2  |
| Donor1-CTGCCTAGTAAGGATT-2  | 5572 | 19836 | 1  |
| Donor1-CTGCCTATCTCTGAGA-2  | 2221 | 8365  | 7  |
| Donor1-CTGCGGACACTGCCAG-2  | 4390 | 14987 | 2  |
| Donor1-CTGCGGATCGACCAGC-2  | 2202 | 4147  | 4  |
| Donor1-CTGCGGATCGTGACAT-2  | 2403 | 5231  | 1  |
| Donor1-CTGCTGTGTCCCTACT-2  | 2496 | 4757  | 3  |
| Donor1-CTGGTCTAGCTGAAAT-2  | 1580 | 3572  | 6  |
| Donor1-CTGTGCTCAGGTCCAC-2  | 3747 | 9852  | 1  |
| Donor1-CTGTGCTTCACATGCA-2  | 2109 | 6351  | 13 |
| Donor1-CTGTGCTTCCTACAGA-2  | 2126 | 8588  | 8  |
| Donor1-CTGTGCTTCCTTGCCA-2  | 3594 | 8425  | 4  |
| Donor1-CTGTTTATCCACGAAT-2  | 5230 | 19210 | 2  |
| Donor1-CTTAACTAGCCTTGAT-2  | 1747 | 7624  | 7  |
| Donor1-CTTACCGAGGAGTTGC-2  | 5171 | 19563 | 6  |
| Donor1-CTTACCGCAATGACCT-2  | 5641 | 19283 | 1  |
| Donor1-CTTACCGGTGTGAAAT-2  | 2162 | 6699  | 13 |
| Donor1-CTTACCGTCAGCAACT-2  | 2792 | 5822  | 5  |
| Donor1-CTTACCGTCTACCAGA-2  | 2131 | 6846  | 9  |
| Donor1-CTTAGGAAGATACACA-2  | 2970 | 7003  | 2  |
| Donor1-CTTAGGACATCCAACA-2  | 2224 | 8077  | 9  |
| Donor1-CTTAGGAGTCCCTACT-2  | 1653 | 5463  | 9  |

Donor1-CTTAGGAGTTCCCTTG-2 2793 5762 3  
Donor1-CTTAGGATCTGTTTGT-2 6913 38497 4  
Donor1-CTTCTCTAGACACGAC-2 3793 9839 3  
Donor1-CTTCTCTCATTGTGCA-2 1699 4593 7  
Donor1-CTTCTCTTCTGCAAGT-2 2115 6139 7  
Donor1-CTTGGCTAGGCATGGT-2 2600 10009 7  
Donor1-CTTGGCTAGTCGATAA-2 2990 19719 8  
Donor1-CTTGGCTCATCCAACA-2 3812 9250 3  
Donor1-GAAATGACATTTGCTT-2 5018 19763 6  
Donor1-GAACATCAGCTAGTGG-2 1512 3983 13  
Donor1-GAACCTAAGGTGCACA-2 2257 3608 6  
Donor1-GAACCTAAGGTGGGTT-2 1993 10688 8  
Donor1-GAACCTACAAAGTGCG-2 3387 8213 3  
Donor1-GAACCTAGTGTATGGG-2 1255 4458 8  
Donor1-GAACCTATCTGGCGTG-2 3389 7456 3  
Donor1-GAACGGACACAAGCCC-2 6014 35012 6  
Donor1-GAAGCAGGTTTGGGCC-2 2165 11014 8  
Donor1-GAAGCAGTCACCCGAG-2 2150 3874 5  
Donor1-GAATGAACAGTCCTTC-2 1145 3526 8  
Donor1-GAATGAAGTAAATGAC-2 1213 3702 13  
Donor1-GAATGAAGTACCTACA-2 1173 3632 8  
Donor1-GAATGAATCAACCAAC-2 1413 4862 8  
Donor1-GACACGCAGCTACCTA-2 5700 18071 2  
Donor1-GACACGCCAGCCTTTC-2 3033 6648 5  
Donor1-GACACGCCATATGGTC-2 3685 12240 11  
Donor1-GACAGAGCATCACGAT-2 1726 3687 4  
Donor1-GACAGAGGTAACAAC-2 3627 7839 3  
Donor1-GACAGAGTCGAGAACG-2 4002 9755 2  
Donor1-GACCAATAGCGCTTAT-2 3720 12631 11  
Donor1-GACCAATCACAACGTT-2 2166 4462 6  
Donor1-GACCAATGTTTGGCGC-2 7078 23043 2  
Donor1-GACCAATTCGCTTGTC-2 895 3498 10  
Donor1-GACCTGGGTAAATACG-2 1617 4310 13  
Donor1-GACCTGGTCGAATCCA-2 2430 7551 10  
Donor1-GACGCGTAGAACTCGG-2 1825 6070 9  
Donor1-GACGCGTAGAATGTTG-2 2308 6887 10  
Donor1-GACGCGGTAGATTAG-2 1389 4680 13  
Donor1-GACGTGCAGCGTGAGT-2 2670 5437 3  
Donor1-GACGTGCAGGATTCGG-2 3626 8353 3  
Donor1-GACGTGCAGTTTCCTT-2 1185 4119 8  
Donor1-GACGTGCCAGACACTT-2 3151 7022 4  
Donor1-GACGTGCCAGTAAGAT-2 5560 24018 1  
Donor1-GACGTTAAGTCTCAAC-2 3376 8007 6  
Donor1-GACTAACGTAGCGTGA-2 2981 6690 3  
Donor1-GACTAACGTGGTACAG-2 2158 10021 8  
Donor1-GACTAACTCGGCGCAT-2 5719 19728 6  
Donor1-GACTACAGTGCCTTGG-2 6500 26101 2  
Donor1-GACTACAGTTCCGTCT-2 2053 7791 9  
Donor1-GACTGCGGTAGTGAAT-2 3088 7415 3  
Donor1-GAGCAGAGTCTAGGTT-2 2389 5050 3  
Donor1-GAGCAGATCTCGATGA-2 2407 9359 9  
Donor1-GAGGTGAAGTCAAGCG-2 1985 5215 6  
Donor1-GAGGTGACACACGCTG-2 1376 4058 13  
Donor1-GAGGTGACAGACAAGC-2 1888 6607 7  
Donor1-GAGGTGAGTTCTGTTT-2 1643 5959 8  
Donor1-GAGTCCGAGCAATATG-2 1682 5075 13

Donor1-GAGTCCGCAAGGTTCT-2 1735 5872 9  
Donor1-GAGTCCGTCTAGCACA-2 1633 5975 13  
Donor1-GATCAGTTCAACGGCC-2 2149 6961 13  
Donor1-GATCAGTTCTACTATC-2 1319 3736 8  
Donor1-GATCGATAGGGTCGAT-2 2408 10769 6  
Donor1-GATCGATGTAATCGTC-2 6454 24495 4  
Donor1-GATCGCGAGAAGGCCT-2 4100 11703 3  
Donor1-GATCGTATCGCTGATA-2 1569 4435 13  
Donor1-GATCTAGAGTTGAGAT-2 4320 11308 2  
Donor1-GATGAAAAGCTGATAA-2 6332 29104 4  
Donor1-GATGAAACACATCCAA-2 6079 21138 1  
Donor1-GATGAGGTCTACGAGT-2 3015 6606 3  
Donor1-GATGCTACATCTGGTA-2 2519 10534 7  
Donor1-GATGCTATCATGTCTT-2 2380 4211 1  
Donor1-GATGCTATCTAACCGA-2 3160 7312 6  
Donor1-GATTCAGAGGCATGTG-2 3518 9092 12  
Donor1-GATTCAGCACACTGCG-2 1587 5472 8  
Donor1-GCAAACCTCAAGTACCT-2 1296 3702 9  
Donor1-GCAAACCTTCATGTGGT-2 1498 3608 7  
Donor1-GCAATCAGTAGCGATG-2 1725 5820 13  
Donor1-GCAATCATCCAAACAC-2 4818 17423 6  
Donor1-GCACATAAGATCGATA-2 2078 4613 6  
Donor1-GCACTCTAGGGTTTCT-2 4979 14405 2  
Donor1-GCACTCTGTGTCAATC-2 1936 5965 13  
Donor1-GCAGCCAAGTCCCACG-2 1460 5037 8  
Donor1-GCAGCCAGTGTGACCC-2 2289 4063 2  
Donor1-GCAGTTAAGAGTAAGG-2 3516 8287 4  
Donor1-GCATAACAAGCTGAAAT-2 1975 6615 13  
Donor1-GCATAACAATAGCGG-2 2185 7534 7  
Donor1-GCATAACAGTTCCGTCT-2 4213 10709 2  
Donor1-GCATAACATCTGAGTGT-2 1697 7311 8  
Donor1-GCATGATTCCGTAGGC-2 1715 6667 9  
Donor1-GCATGCGAGACCGGAT-2 4061 9856 3  
Donor1-GCATGCGAGATCTGAA-2 4194 17696 6  
Donor1-GCATGCGCATCCTTGC-2 4467 11293 5  
Donor1-GCATGTAAGTAATCCC-2 1185 3496 8  
Donor1-GCATGTAGTGTGCCTG-2 3130 7241 3  
Donor1-GCATGTATCCTGCTTG-2 3630 10431 6  
Donor1-GCATGTATCTAACGGT-2 2008 7164 13  
Donor1-GCCAAATAGCGAGAAA-2 2607 5110 2  
Donor1-GCCAAATAGTGGCACA-2 5086 20763 4  
Donor1-GCCTCTAAGCTACCGC-2 3680 8788 4  
Donor1-GCCTCTATCATTTGGG-2 3362 8418 3  
Donor1-GCGACCAAGCCCAGCT-2 4353 11957 3  
Donor1-GCGAGAAAGACCCACC-2 4680 13824 1  
Donor1-GCGAGAAGTCACACGC-2 3482 9255 2  
Donor1-GCGCAACGTATCTGCA-2 3594 8813 3  
Donor1-GCGCAACGTGAGCGAT-2 2503 4563 6  
Donor1-GCGCCAAAGCCAACAG-2 1527 4724 13  
Donor1-GCGCGATCACTGTGTA-2 1162 3986 8  
Donor1-GCGCGATCATGCAACT-2 1259 3717 7  
Donor1-GCGCGATGTGTTGAGG-2 1365 4952 8  
Donor1-GCGCGATTCAGTTCGA-2 1745 6032 7  
Donor1-GCGGGTTAGCGTGTCC-2 3554 7551 5  
Donor1-GCGGGTTCAAGCGTAG-2 2300 3608 5  
Donor1-GCGGGTTGTTATTCTC-2 3444 22081 7

Donor1-GCGGGTTTCGATGAGG-2 7020 37401 4  
Donor1-GCTCTGTCAGGATCGA-2 3860 10124 4  
Donor1-GCTGCAGAGACATAAC-2 2280 6339 13  
Donor1-GCTGCAGTCCGTTGTC-2 1675 4585 7  
Donor1-GCTGCGAAGAGAACAG-2 2914 10859 6  
Donor1-GCTGCGACACCTTGTC-2 2904 8529 11  
Donor1-GCTGCGACATCGATTG-2 2078 7831 9  
Donor1-GCTGCGAGTTCAGTAC-2 4146 11302 5  
Donor1-GCTGCTTAGATCCTGT-2 1851 5989 10  
Donor1-GCTGCTTAGCTGCCCA-2 1394 4445 8  
Donor1-GCTGCTTCACTTCGAA-2 2259 7340 11  
Donor1-GCTGCTTCATTGCGGC-2 2204 7701 13  
Donor1-GCTGCTTGTTCCCTTG-2 1949 9375 8  
Donor1-GCTGGGTAGGGTCTCC-2 1246 3798 13  
Donor1-GCTGGGTGTCTTGTC-2 1203 3834 8  
Donor1-GCTTCCACAGCCAATT-2 2147 6250 7  
Donor1-GCTTCCACAGTGAGTG-2 1695 4826 13  
Donor1-GCTTCCAGTCGGCACT-2 1692 6137 7  
Donor1-GCTTCCAGTGTGAAAT-2 1487 3972 13  
Donor1-GCTTCCATCAGCGACC-2 1761 5375 7  
Donor1-GCTTGAAAGACAAAGG-2 5201 17955 2  
Donor1-GCTTGAAAGAGGGATA-2 6793 34642 5  
Donor1-GCTTGAAGTGACGCCT-2 3645 9148 3  
Donor1-GCTTGAAGTGCAATC-2 1507 5229 9  
Donor1-GCTTGAAGTTACGTCA-2 1347 3534 7  
Donor1-GCTTGAATCGGTCTAA-2 1215 3787 8  
Donor1-GGAAAGCCAGCGTTCG-2 3497 12798 12  
Donor1-GGAAAGCCAGTCAGCC-2 2204 6562 10  
Donor1-GGAAAGCGTTGACGTT-2 1320 4704 8  
Donor1-GGAAAGCGTTGCCTCT-2 2357 5180 3  
Donor1-GGAAAGCTCAACACTG-2 2709 5164 6  
Donor1-GGAAAGCTCCCAAGAT-2 1429 4998 8  
Donor1-GGAACTTAGATCCTGT-2 2685 5353 1  
Donor1-GGAACTTCAATGACCT-2 4106 11566 4  
Donor1-GGAACTTCACTGAAGG-2 1769 3618 6  
Donor1-GGAACTTTCACAGGCC-2 2464 8084 10  
Donor1-GGAATAACATAGACTC-2 1453 3549 13  
Donor1-GGAATAAGTCGAAAGC-2 4643 14393 1  
Donor1-GGAATAAGTCTAGCCG-2 6857 31446 2  
Donor1-GGACAAGAGAGCTGCA-2 1317 4135 8  
Donor1-GGACAAGCACGTTGGC-2 4071 11480 3  
Donor1-GGACAAGCATCAGTAC-2 5545 19536 3  
Donor1-GGACAAGGTCGCTTCT-2 2347 4718 1  
Donor1-GGACAAGTCACAATGC-2 1640 3934 11  
Donor1-GGACAAGTCAGCATGT-2 1865 7315 9  
Donor1-GGACAGAAGAATAGGG-2 1180 3728 8  
Donor1-GGACATTAGTATTGGA-2 2710 5453 6  
Donor1-GGACATTTCAAACCAC-2 4925 14706 6  
Donor1-GGAGCAAGTTCCGGCA-2 2041 5240 10  
Donor1-GGAGCAAGTTCTGAAC-2 3228 26381 8  
Donor1-GGAGCAATCACATGCA-2 2032 4705 2  
Donor1-GGAGCAATCCTAGGGC-2 1548 4520 13  
Donor1-GGATGTTAGGACGAAA-2 4675 14044 2  
Donor1-GGATGTTAGTCCGGTC-2 2817 5606 2  
Donor1-GGATGTTGTGCAGTAG-2 2949 7072 3  
Donor1-GGATGTTGTGTCCTCT-2 1382 4237 8

Donor1-GGATGTTGTGTGAAAT-2 6509 24029 3  
Donor1-GGATTACAGTCAATAG-2 1170 3572 8  
Donor1-GGATTACCATCGGTTA-2 2956 6910 6  
Donor1-GGCAATTCATCCCATC-2 2103 5958 10  
Donor1-GGCAATTGTCATGCCG-2 1420 3746 13  
Donor1-GGCAATTGTTACGGAG-2 1350 4859 9  
Donor1-GGCAATTTCACTCTTA-2 6407 22569 3  
Donor1-GGCAATTTTCAGAGACG-2 3398 16629 7  
Donor1-GGCAATTTTCGCTGAG-2 3635 7556 2  
Donor1-GGCCGATAGATTACCC-2 5217 20291 3  
Donor1-GGCCGATAGCAGGTCA-2 1139 4082 8  
Donor1-GGCCGATCAAAGCAAT-2 1292 4110 8  
Donor1-GGCCGATTCGCTTGTC-2 1432 4262 7  
Donor1-GGCCGATTCTCGTTTA-2 4049 12727 6  
Donor1-GGCGACTAGTAGATGT-2 2785 13488 7  
Donor1-GGCGACTCACTCGACG-2 1820 3794 6  
Donor1-GGCGACTGTTACGTCA-2 1389 4103 13  
Donor1-GGCTCGACATGTCTCC-2 6288 24133 1  
Donor1-GGCTCGAGTGACGGTA-2 2627 6564 6  
Donor1-GGCTGGTGTTCAGTAC-2 1765 4606 7  
Donor1-GGGAATGAGGTGCACA-2 2265 9135 8  
Donor1-GGGAATGAGTAACCCT-2 2805 10728 7  
Donor1-GGGAATGTCCGCATCT-2 1282 4728 8  
Donor1-GGGACCTCAACGATCT-2 3116 6735 1  
Donor1-GGGAGATTCTTCCTTC-2 5620 19849 4  
Donor1-GGGATGAAGAGGACGG-2 5200 16273 2  
Donor1-GGGATGACACACGCTG-2 6492 32590 4  
Donor1-GGGATGACAGGCTCAC-2 2447 4766 3  
Donor1-GGGATGACATTCTCAT-2 1394 4510 8  
Donor1-GGGATGATCATGTAGC-2 2152 3773 4  
Donor1-GGGCACTGTCCGAAGA-2 3448 7837 3  
Donor1-GGGCATCCAACGCACC-2 1945 8504 8  
Donor1-GGGCATCGTCACCCAG-2 2036 7177 7  
Donor1-GGGTCTGAGCAATCTC-2 2048 3547 6  
Donor1-GGGTCTGAGCTGATAA-2 1324 3650 8  
Donor1-GGGTCTGGTCGACTAT-2 1565 4130 7  
Donor1-GGGTCTGTCTTCGAGA-2 2142 4236 6  
Donor1-GGGTTGCGTACGAAAT-2 1526 6463 8  
Donor1-GGTATTGAGCTCAACT-2 3064 6774 1  
Donor1-GGTATTGAGGGCATGT-2 2354 5588 6  
Donor1-GGTATTGGTCATTAGC-2 5452 17461 1  
Donor1-GGTATTGTCCTAGGGC-2 2947 5054 5  
Donor1-GGTGAAGTCAGAGACG-2 2760 6874 2  
Donor1-GGTGAAGTCCGAACGC-2 2166 4657 11  
Donor1-GGTGAAGTCCTAGGGC-2 2536 5566 3  
Donor1-GGTGCGTTCTTACCTA-2 2913 15757 12  
Donor1-GTAACGTAGGACAGCT-2 1655 6249 7  
Donor1-GTAACGTCAAAGGTGC-2 4608 12459 6  
Donor1-GTAACGTCACTTACGA-2 3228 7701 3  
Donor1-GTAACGTCATTGAGCT-2 1432 3474 13  
Donor1-GTAACGTGTCGGATCC-2 1594 6671 8  
Donor1-GTAACGTTCCATAGC-2 5451 18234 1  
Donor1-GTAACGTTCCATGCTC-2 1727 5429 7  
Donor1-GTAACGTTCCGAGGTA-2 1309 3484 7  
Donor1-GTAACGTTCCGGATGTT-2 3003 6298 6  
Donor1-GTAACTGAGACGCACA-2 6793 32499 1

Donor1-GTACGTAAGTACACCT-2 3970 10628 4  
Donor1-GTACGTATCTTGTATC-2 4493 12384 2  
Donor1-GTACTCCGTCGAGTTT-2 1209 4226 9  
Donor1-GTACTCCTCACTCCTG-2 4217 10875 1  
Donor1-GTACTCCTCGAACTGT-2 1861 5919 7  
Donor1-GTACTTTTAGGCCCGTT-2 1445 3567 11  
Donor1-GTACTTTTCACTTCTGC-2 1903 7648 8  
Donor1-GTACTTTTCAAGCGATCC-2 4707 13822 1  
Donor1-GTACTTTTGTAGGGTAC-2 4048 15690 10  
Donor1-GTAGGCCAGCCGTCGT-2 2169 4168 2  
Donor1-GTAGGCCCTCCCTAACC-2 4706 14083 1  
Donor1-GTAGTCAGTCCGAACC-2 3062 10776 12  
Donor1-GTATCTTCAACTGCGC-2 3458 12727 11  
Donor1-GTATCTTTCCTAAGTG-2 2803 10121 9  
Donor1-GTATTCTGTTATCGGT-2 2257 5850 6  
Donor1-GTATTCTTCGTAGGTT-2 1275 4403 8  
Donor1-GTCAAGTGTGCCTGGT-2 2997 6800 2  
Donor1-GTCAAGTTCAGAGGA-2 2132 5941 12  
Donor1-GTCACAACATGCTAGT-2 1525 4459 13  
Donor1-GTCACAAGTAATAGCA-2 1166 3524 8  
Donor1-GTCACAAGTTTGCATG-2 3764 12919 6  
Donor1-GTCACAATCTGGTTCC-2 1802 7126 8  
Donor1-GTCACGGAGCGAGAAA-2 2267 5672 11  
Donor1-GTCACGGAGTGGGTTG-2 2808 6022 4  
Donor1-GTCACGGAGTGTTTGC-2 2737 5895 3  
Donor1-GTCACGGCAAAGTGCG-2 2342 6185 6  
Donor1-GTCATTTTCACTATGG-2 1670 4097 10  
Donor1-GTCATTTTCCTAAGTG-2 2526 8736 7  
Donor1-GTCCTCAAGACGACGT-2 3484 8777 3  
Donor1-GTCCTCAAGCTCCCAG-2 2545 4346 5  
Donor1-GTCCTCAAGCTGCCCA-2 2881 10752 10  
Donor1-GTCCTCAAGTAACCCT-2 2283 4643 3  
Donor1-GTCGGGTAGATCGATA-2 1722 5113 13  
Donor1-GTCGGGTGTACGCACC-2 2008 4986 13  
Donor1-GTCGGGTGTATGGTTC-2 1545 5575 8  
Donor1-GTCGGGTGTTCGGATCC-2 2310 12297 8  
Donor1-GTCGGGTGTTTGGCGC-2 1741 3496 4  
Donor1-GTCGGGTTCCCTCAATT-2 2072 4977 10  
Donor1-GTCGTAAAGTTGCAGG-2 1633 5414 9  
Donor1-GTCGTAAACAATCCAAC-2 1483 4340 13  
Donor1-GTCGTAAACAGTTCATG-2 2625 4315 5  
Donor1-GTCGTAAAGTAGAAAGG-2 3222 9718 11  
Donor1-GTCGTAAAGTGTGGTTT-2 2023 7987 7  
Donor1-GTCGTAAATCTCGCATC-2 4033 10912 1  
Donor1-GTCTTCGCAGATCCAT-2 2409 5925 6  
Donor1-GTCTTCGCATATGCTG-2 5632 18701 2  
Donor1-GTCTTCGGTAGCGTAG-2 1376 5520 8  
Donor1-GTGAAGGCAGATCCAT-2 2882 13002 7  
Donor1-GTGCAGCTCGTCGTTC-2 5383 30662 5  
Donor1-GTGCATAAGTACATGA-2 3389 16290 7  
Donor1-GTGCATATCTTACCTA-2 2319 5787 6  
Donor1-GTGCGGTAGCTGTTCA-2 1586 4968 13  
Donor1-GTGCGGTCAAGTTAAG-2 1097 3609 8  
Donor1-GTGCGGTCACCTATCC-2 2008 7384 9  
Donor1-GTGCGGTGTACGACCC-2 2970 6271 3  
Donor1-GTGCGGTTCAGCATGT-2 1662 4425 13

|                            |      |       |    |
|----------------------------|------|-------|----|
| Donor1-GTGCTTCAGTTAACGA-2  | 2059 | 7188  | 9  |
| Donor1-GTGCTTCAGTTGCAGG-2  | 2582 | 5497  | 3  |
| Donor1-GTGCTTCAGTAACGG-2   | 3967 | 10412 | 6  |
| Donor1-GTGGGTCTCCCTAATT-2  | 4564 | 11889 | 2  |
| Donor1-GTGTTAGCACCGAATT-2  | 3321 | 8494  | 3  |
| Donor1-GTTAAGCAGACAATAC-2  | 2834 | 6659  | 3  |
| Donor1-GTTAAGCAGCTGCCCA-2  | 1626 | 6572  | 8  |
| Donor1-GTTAAGCCAAGCGATG-2  | 1814 | 6097  | 9  |
| Donor1-GTTAAGCCACGCTTTC-2  | 1366 | 4021  | 7  |
| Donor1-GTTAAGCGTATCACCA-2  | 4172 | 10233 | 5  |
| Donor1-GTTACAGAGAACAATC-2  | 1535 | 6336  | 8  |
| Donor1-GTTACAGTCAGCCTAA-2  | 2264 | 6848  | 10 |
| Donor1-GTTCATTAGTGTACGG-2  | 1407 | 3955  | 13 |
| Donor1-GTTCATTCAACAACCT-2  | 3670 | 11476 | 11 |
| Donor1-GTTCATTACCAGGTC-2   | 3030 | 6644  | 3  |
| Donor1-GTTCATTACGCTGTG-2   | 3565 | 7718  | 3  |
| Donor1-GTTCATTATGTCCTC-2   | 3267 | 8244  | 3  |
| Donor1-GTTCATTGTCAGGACA-2  | 1600 | 3895  | 10 |
| Donor1-GTTCGGGAGAATCCC-2   | 3627 | 9844  | 4  |
| Donor1-GTTCGGGCAATCGGTT-2  | 3091 | 9303  | 6  |
| Donor1-GTTCGGGGTGCTTCTC-2  | 1987 | 5010  | 6  |
| Donor1-GTTCGGGGTGTCGCTG-2  | 4412 | 13785 | 3  |
| Donor1-GTTCTCGTCAGGCGAA-2  | 1624 | 3941  | 12 |
| Donor1-GTTCTCGTCTCTGTCG-2  | 3243 | 7509  | 4  |
| Donor1-TAAACCGCATTCACTT-2  | 3074 | 6954  | 3  |
| Donor1-TAAACCGGTCCAGTGC-2  | 2788 | 6128  | 2  |
| Donor1-TAAGAGACATGGTTGT-2  | 2798 | 6484  | 4  |
| Donor1-TAAGAGATCAAGCCTA-2  | 3064 | 7524  | 5  |
| Donor1-TAAGAGATCCTTCAAT-2  | 7140 | 25657 | 3  |
| Donor1-TAAGCGTGTAAGAGGA-2  | 4241 | 12724 | 6  |
| Donor1-TAAGCGTGTACCAGTT-2  | 1938 | 9817  | 8  |
| Donor1-TAAGCGTTCGTCTGAA-2  | 1796 | 5649  | 13 |
| Donor1-TAAGTGCCATCGGAAG-2  | 1341 | 3924  | 8  |
| Donor1-TACACGAAGCACGCCT-2  | 1159 | 3663  | 8  |
| Donor1-TACACGAGTACCGTTA-2  | 1569 | 4436  | 7  |
| Donor1-TACAGTGAGCGTGAAC-2  | 1838 | 7954  | 8  |
| Donor1-TACCTATCAAACCTAC-2  | 5649 | 18635 | 1  |
| Donor1-TACCTATTCGCTAGCG-2  | 2069 | 5319  | 10 |
| Donor1-TACCTTAGTTCACCTC-2  | 1614 | 3969  | 8  |
| Donor1-TACCTTATCCAGGGCT-2  | 1666 | 5835  | 7  |
| Donor1-TACCTTATCCCTAATT-2  | 2872 | 6477  | 1  |
| Donor1-TACGGATAGTTTAGGA-2  | 3655 | 9810  | 1  |
| Donor1-TACGGATGTAAGTTCC-2  | 2138 | 11521 | 8  |
| Donor1-TACGGATTCGCGATCG-2  | 7015 | 55070 | 4  |
| Donor1-TACGGGCCAGGATTGG-2  | 2192 | 6861  | 11 |
| Donor1-TACGGGCCATTGGGCC-2  | 3535 | 7915  | 2  |
| Donor1-TACTCATAGTACCGGA-2  | 2681 | 5416  | 5  |
| Donor1-TACTCATCAAACCTGCT-2 | 1812 | 5825  | 13 |
| Donor1-TACTCATTCACGATGT-2  | 7713 | 39229 | 5  |
| Donor1-TACTCATTCACCTTCAT-2 | 3282 | 7091  | 1  |
| Donor1-TACTCGCAGACACGAC-2  | 2594 | 9811  | 9  |
| Donor1-TACTCGCAGCGTAGTG-2  | 1391 | 3764  | 13 |
| Donor1-TACTCGCAGGTGATTA-2  | 1273 | 4248  | 8  |
| Donor1-TACTCGCCAGTCAGCC-2  | 1891 | 8104  | 8  |
| Donor1-TACTCGCTCTCTGTCG-2  | 3862 | 17347 | 6  |
| Donor1-TACTTACAGGTGCACA-2  | 1735 | 5692  | 13 |



Donor1-TACTTACGTCCA ACTA-2 5156 15848 1  
Donor1-TACTTACGTTGTGCGCG-2 1409 5013 8  
Donor1-TAGACCACATCCC ACT-2 2005 4903 10  
Donor1-TAGACCAGTACCAGTT-2 1556 3956 13  
Donor1-TAGACCAGTTACGGAG-2 2866 9536 6  
Donor1-TAGACCAGTTATTCTC-2 1743 5250 13  
Donor1-TAGACCATCCATGAAC-2 1231 3472 7  
Donor1-TAGAGCTCAGTGACAG-2 1919 6139 9  
Donor1-TAGAGCTTCCACTCCA-2 2613 9648 9  
Donor1-TAGCCGGCACCACCAG-2 1038 3951 8  
Donor1-TAGCCGGTCCTGTAGA-2 5089 24169 5  
Donor1-TAGCCGGTCGCTGATA-2 4257 9755 3  
Donor1-TAGGCATTCTCCAACC-2 1477 4400 7  
Donor1-TAGTGGTCAATGACCT-2 3615 8728 4  
Donor1-TAGTGGTCATTAGCCA-2 3434 7933 3  
Donor1-TAGTTGGAGCGCTTAT-2 2208 3857 11  
Donor1-TAGTTGGCAGCCTTTC-2 4075 16713 6  
Donor1-TAGTTGGCAGGGAGAG-2 2089 3663 6  
Donor1-TAGTTGGGTCTTTCAT-2 1249 4614 8  
Donor1-TAGTTGGTCTTGTTTG-2 4444 12122 3  
Donor1-TATCAGGAGGACACCA-2 1560 4130 13  
Donor1-TATCAGGCATAAGACA-2 3506 9221 6  
Donor1-TATCAGGCATACAGCT-2 1692 4767 11  
Donor1-TATCAGGGTTGACGTT-2 2317 8645 13  
Donor1-TATTACCAGAGAGCTC-2 6999 28688 1  
Donor1-TCAACGAAGTGGGTTG-2 3419 7916 4  
Donor1-TCAACGAGTACACCGC-2 1234 3939 8  
Donor1-TCAATCTAGAGGTTAT-2 1733 4026 10  
Donor1-TCAATCTAGGACACCA-2 4192 10456 5  
Donor1-TCAATCTAGTAGTGC-2 1281 4043 13  
Donor1-TCAATCTCACCAGATT-2 3155 6496 3  
Donor1-TCACAAGTCCCAGGTG-2 2289 8710 13  
Donor1-TCACGAAAGCAGGCTA-2 1205 4536 8  
Donor1-TCACGAACAGTCAGCC-2 3101 7146 3  
Donor1-TCACGAAGTCTCCCTA-2 1867 5147 13  
Donor1-TCAGCAAAGAGGGATA-2 4063 11689 3  
Donor1-TCAGCAAAGTGTACTC-2 1912 6129 13  
Donor1-TCAGCAACACAACGTT-2 7223 38949 5  
Donor1-TCAGCAACAGGAACGT-2 3635 9128 2  
Donor1-TCAGCAAGTGTGAAAT-2 2089 10736 8  
Donor1-TCAGCTCCATCCTAGA-2 3624 8204 3  
Donor1-TCAGGATCAACACGCC-2 1262 3570 8  
Donor1-TCAGGATGTAAACACA-2 1746 4853 13  
Donor1-TCAGGTAAGTGTACGG-2 2259 4293 6  
Donor1-TCATTACAGTAGCGGT-2 4090 14584 6  
Donor1-TCATTACCAATAACGA-2 2428 7869 10  
Donor1-TCATTACCACTGTGTA-2 3580 12957 11  
Donor1-TCATTTGCATGTAGTC-2 3555 7606 2  
Donor1-TCATTTGGTTGTGGAG-2 1290 4971 8  
Donor1-TCATTTGTCATCGGAT-2 1087 3531 8  
Donor1-TCATTTGTCTCTTATG-2 1420 3511 13  
Donor1-TCCACACTCGGAATCT-2 1502 3858 13  
Donor1-TCCCGATAGAGTGAGA-2 3618 8257 5  
Donor1-TCCCGATAGTGTACGG-2 1372 4368 9  
Donor1-TCCCGATCACGGCCAT-2 1549 6927 8  
Donor1-TCCCGATTACATGCA-2 1252 4009 8

|                            |      |       |    |
|----------------------------|------|-------|----|
| Donor1-TCGAGGCGTGGTCTCG-2  | 2061 | 5256  | 10 |
| Donor1-TCGAGGCTCTTAGAGC-2  | 2349 | 3893  | 5  |
| Donor1-TCGCGAGGTCAGCTAT-2  | 4787 | 13170 | 2  |
| Donor1-TCGCGAGTCACCACCT-2  | 5404 | 19245 | 3  |
| Donor1-TCGCGAGTCAGCACAT-2  | 5051 | 14574 | 3  |
| Donor1-TCGCGAGTCCCACTTG-2  | 1962 | 4999  | 11 |
| Donor1-TCGCGAGTCGTACCGG-2  | 1701 | 7835  | 8  |
| Donor1-TCGCGTTGTACCGAGA-2  | 1758 | 4662  | 13 |
| Donor1-TCGCGTTGTGCACCAC-2  | 1422 | 4924  | 8  |
| Donor1-TCGGTAAAGGCGATAC-2  | 1758 | 6544  | 13 |
| Donor1-TCGGTAAAGTCGGATCC-2 | 2865 | 6914  | 3  |
| Donor1-TCGGTAAAGTCGGCACT-2 | 7804 | 47685 | 4  |
| Donor1-TCGGTAAAGTCTGATCA-2 | 2989 | 6018  | 5  |
| Donor1-TCGGTAAATCACAACGT-2 | 2891 | 6030  | 5  |
| Donor1-TCGTACCCAGCCACCA-2  | 1260 | 4182  | 13 |
| Donor1-TCGTAGACAAACAACA-2  | 4131 | 10325 | 3  |
| Donor1-TCGTAGAGTGCAGACA-2  | 2073 | 5881  | 6  |
| Donor1-TCTCATACAAGCGATG-2  | 1626 | 4433  | 7  |
| Donor1-TCTCATAGTAAAGTCA-2  | 1191 | 3848  | 8  |
| Donor1-TCTCATAGTCAAAGCG-2  | 2437 | 5210  | 3  |
| Donor1-TCTCTAATCTAACCGA-2  | 2631 | 5037  | 6  |
| Donor1-TCTGAGAAGTTGAGAT-2  | 7345 | 39546 | 4  |
| Donor1-TCTGAGAAGTTGTAGA-2  | 3914 | 16858 | 6  |
| Donor1-TCTGAGAGTAGCTAAA-2  | 4417 | 24761 | 7  |
| Donor1-TCTGGAAAGGGTGTTG-2  | 3775 | 9299  | 4  |
| Donor1-TCTGGAACACTGTGTA-2  | 2886 | 10403 | 9  |
| Donor1-TCTGGAACAGCCTTGG-2  | 2934 | 6892  | 3  |
| Donor1-TCTGGAATCATTATCC-2  | 6112 | 20175 | 2  |
| Donor1-TCTGGAATCCTTGGTC-2  | 2071 | 4049  | 6  |
| Donor1-TCTGGAATCTGTCTAT-2  | 3218 | 6863  | 2  |
| Donor1-TCTTCGGTCCTTGGTC-2  | 2737 | 5949  | 3  |
| Donor1-TCTTTCCGTGGACGAT-2  | 4935 | 14885 | 4  |
| Donor1-TCTTTCCCTCTCTAGGA-2 | 5864 | 22525 | 5  |
| Donor1-TGAAAGACAAGGACAC-2  | 2855 | 10271 | 7  |
| Donor1-TGAAAGACAGTCGTGC-2  | 4719 | 53512 | 8  |
| Donor1-TGAAAGACATGGTCAT-2  | 3029 | 7254  | 4  |
| Donor1-TGAAAGATCGTCGTTTC-2 | 1264 | 4446  | 8  |
| Donor1-TGACAACAGTTAGCGG-2  | 3124 | 15873 | 7  |
| Donor1-TGACAACCATGGAATA-2  | 4337 | 13253 | 3  |
| Donor1-TGACAACGTATAAACG-2  | 8452 | 74828 | 6  |
| Donor1-TGACAACGTCAAACCTC-2 | 2563 | 5372  | 1  |
| Donor1-TGACAACGTCCGAAGA-2  | 1847 | 6541  | 9  |
| Donor1-TGACGGCAGGTGTTAA-2  | 1937 | 3880  | 5  |
| Donor1-TGACGGCAGTGGGATC-2  | 3988 | 10845 | 3  |
| Donor1-TGACGGCTCTTGAGGT-2  | 2685 | 18295 | 8  |
| Donor1-TGACTAGAGGTGACCA-2  | 1519 | 4670  | 13 |
| Donor1-TGACTAGGTCATACTG-2  | 2413 | 4845  | 5  |
| Donor1-TGACTAGGTCTAAAGA-2  | 1600 | 5003  | 13 |
| Donor1-TGACTAGGTGTGACGA-2  | 2502 | 4546  | 2  |
| Donor1-TGACTTTGTAGAGTGC-2  | 1840 | 4903  | 10 |
| Donor1-TGAGAGGCACGAAAGC-2  | 2860 | 11062 | 7  |
| Donor1-TGAGAGGTCGTCACGG-2  | 1455 | 3731  | 9  |
| Donor1-TGAGCATAGCATCATC-2  | 5045 | 15102 | 3  |
| Donor1-TGAGCCGGTACAAGTA-2  | 3542 | 6981  | 6  |
| Donor1-TGAGCCGGTCCCTTGT-2  | 1346 | 4512  | 13 |
| Donor1-TGAGCCGTCGTAGGAG-2  | 2605 | 4739  | 6  |

|                            |      |       |    |
|----------------------------|------|-------|----|
| Donor1-TGAGGGAAGATCCCGC-2  | 1462 | 4320  | 13 |
| Donor1-TGAGGGAAGCACGCCT-2  | 4422 | 12961 | 1  |
| Donor1-TGAGGGAAGCTGCCCA-2  | 7141 | 59894 | 4  |
| Donor1-TGATTTCTCCAGAAGG-2  | 1473 | 4792  | 9  |
| Donor1-TGCACCTAGCACCGCT-2  | 3669 | 9499  | 3  |
| Donor1-TGCACCTGTCGCTTCT-2  | 3618 | 8152  | 3  |
| Donor1-TGCACCTTCCATGAAC-2  | 1373 | 3839  | 13 |
| Donor1-TGCCAAATCGCACTCT-2  | 3566 | 19125 | 7  |
| Donor1-TGCCCATAGACTACAA-2  | 2423 | 4441  | 2  |
| Donor1-TGCCCATAGCAGATCG-2  | 5421 | 19686 | 1  |
| Donor1-TGCCCATGTGACGCCT-2  | 1555 | 4034  | 7  |
| Donor1-TGCCCATCAAGGTAA-2   | 3752 | 8517  | 5  |
| Donor1-TGCCCTACACATCCAA-2  | 2840 | 5840  | 2  |
| Donor1-TGCCCTAGTGCACCAC-2  | 4751 | 13918 | 1  |
| Donor1-TGCCCTATCACAACGT-2  | 2184 | 8553  | 7  |
| Donor1-TGCGCAGGTATGAATG-2  | 3696 | 9970  | 3  |
| Donor1-TGCGGGTGTACCCAAT-2  | 3751 | 9473  | 3  |
| Donor1-TGCGGGTTCAGATCA-2   | 1906 | 6392  | 9  |
| Donor1-TGCGTGGAGCTGCGAA-2  | 2588 | 5961  | 6  |
| Donor1-TGCGTGGGTCCGTCAG-2  | 2960 | 11350 | 7  |
| Donor1-TGCGTGGGTGGTAAA-2   | 2037 | 3775  | 5  |
| Donor1-TGCGTGGTCGGATGGA-2  | 4497 | 13528 | 1  |
| Donor1-TGCTACCCACGAAGCA-2  | 1830 | 6192  | 8  |
| Donor1-TGCTACCCATTCCTGC-2  | 1863 | 5535  | 13 |
| Donor1-TGCTGCTCAGTTAACC-2  | 1427 | 5701  | 8  |
| Donor1-TGGACGCTCACATGCA-2  | 1493 | 4014  | 13 |
| Donor1-TGGACGCTCAGCGATT-2  | 3056 | 6726  | 4  |
| Donor1-TGGACGCTCTCGAGTA-2  | 1952 | 8200  | 9  |
| Donor1-TGGCCAGAGCTACCGC-2  | 5003 | 16133 | 2  |
| Donor1-TGGCCAGCACCACCAG-2  | 5345 | 17081 | 2  |
| Donor1-TGGCCAGGTGACGCCT-2  | 1639 | 6494  | 8  |
| Donor1-TGGCCAGGTTGCTCCT-2  | 5189 | 17151 | 2  |
| Donor1-TGGCCAGTCGGCGCTA-2  | 1318 | 4267  | 8  |
| Donor1-TGGCTGGTACTTAGC-2   | 5819 | 20020 | 3  |
| Donor1-TGGCTGGGTGACAAAT-2  | 1545 | 5984  | 8  |
| Donor1-TGGCTGGGTTCAGCGC-2  | 1666 | 7749  | 8  |
| Donor1-TGGGAAGAGCTCCCAG-2  | 1639 | 4535  | 13 |
| Donor1-TGGGAAGTCGTCCAGG-2  | 2013 | 4426  | 4  |
| Donor1-TGGGCGTGTCTCAACA-2  | 7662 | 36736 | 3  |
| Donor1-TGGTTCCCAACACGCC-2  | 1237 | 3783  | 8  |
| Donor1-TGGTTCCGTTGTCTTT-2  | 2986 | 10329 | 6  |
| Donor1-TGGTTCCCTCCTGCCAT-2 | 1920 | 6423  | 13 |
| Donor1-TGTATTCAGGCCATAG-2  | 4975 | 15338 | 2  |
| Donor1-TGTATTCAGTTAGCGG-2  | 5359 | 18240 | 1  |
| Donor1-TGTATTCGTCTCCACT-2  | 2047 | 5878  | 10 |
| Donor1-TGTCCCAAGACTTTCG-2  | 4308 | 12191 | 2  |
| Donor1-TGTCCACATACAGCT-2   | 1909 | 4167  | 3  |
| Donor1-TGTCCAGTCGTGGCT-2   | 3613 | 8920  | 3  |
| Donor1-TGTTCCGCACCAGTTA-2  | 2579 | 7234  | 4  |
| Donor1-TTAACTCAGAGTGAGA-2  | 2736 | 4633  | 5  |
| Donor1-TTAACTCAGCCATCGC-2  | 1702 | 4846  | 10 |
| Donor1-TTAACTCCAATGACCT-2  | 1321 | 3853  | 13 |
| Donor1-TTAGGACAGTCAAGCG-2  | 2627 | 13733 | 7  |
| Donor1-TTAGGACCACGCTTTC-2  | 3049 | 6919  | 1  |
| Donor1-TTAGGCAAGCACGCCT-2  | 2099 | 6395  | 13 |
| Donor1-TTAGGCAGTCACACGC-2  | 1689 | 5716  | 7  |

Donor1-TTAGGCATCTCCAGGG-2 2912 6526 3  
Donor1-TTAGTTCGTATGAAAC-2 3842 9848 3  
Donor1-TTAGTTCTCATTGCGA-2 2180 4130 2  
Donor1-TTATGCTGTTATCACG-2 4541 12349 3  
Donor1-TTCGAAGGTCCAGTGC-2 3279 9060 1  
Donor1-TTCGAAGGTTACGACT-2 2256 7911 13  
Donor1-TTCTACAAGTCCAGGA-2 4752 12532 3  
Donor1-TTCTTAGAGCCCGAAA-2 1478 5811 8  
Donor1-TTGAACGCAATGCCAT-2 1912 4267 6  
Donor1-TTGAACGGTAGGCTGA-2 3407 11834 6  
Donor1-TTGACTTAGATGCCAG-2 1986 6954 7  
Donor1-TTGACTTAGCACCGCT-2 2465 4314 5  
Donor1-TTGACTTAGTTAACGA-2 2670 9494 7  
Donor1-TTGACTTGTTGGACCC-2 2311 9181 9  
Donor1-TTGACTTTCATGTCCC-2 1510 3710 13  
Donor1-TTGCCGTGTCTCTTG-2 4231 11660 2  
Donor1-TTGCCGTTCTGTACGA-2 1488 6096 8  
Donor1-TTGCGTCAGCGCCTCA-2 1621 6422 8  
Donor1-TTGCGTCGTAGCAAAT-2 1666 3869 6  
Donor1-TTGCGTCTCCCTTGCA-2 6668 26276 3  
Donor1-TTGGAACAGCACCGTC-2 2117 6208 13  
Donor1-TTGGAACCAGACAAAT-2 2011 7158 13  
Donor1-TTGGAACCATAGAAAC-2 6441 26046 4  
Donor1-TTGGAACGTCGAGATG-2 1426 5543 8  
Donor1-TTGCAAAGATAGGAG-2 1341 4410 7  
Donor1-TTGCAACACGACGAA-2 1107 4018 8  
Donor1-TTGCAACAGACAAGC-2 1828 8983 8  
Donor1-TTGCAAGTAAGAGGA-2 3185 7381 3  
Donor1-TTGTAGGCAAGCCATT-2 5277 18571 2  
Donor1-TTGTAGGGTAGCCTCG-2 1873 7549 8  
Donor1-TTGTAGGGTTGGACCC-2 1952 3760 3  
Donor1-TTGTAGGTCTTAGCCC-2 2933 9981 10  
Donor1-TTTRACTGGTGTGAGG-2 5184 25802 6  
Donor1-TTTRACTGTCCGAGCCA-2 3612 8628 4  
Donor1-TTTATGCAGTTGCAGG-2 2282 8485 7  
Donor1-TTTCCTCAGATGCGAC-2 1975 3860 6  
Donor1-TTTCCTCAGTAGGCCA-2 5239 14761 1  
Donor1-TTTCCTCGTACCGGCT-2 2241 7209 7  
Donor1-TTTCCTCGTCGGCTCA-2 2070 4188 5  
Donor1-TTTCCTCGTTGGTGGA-2 4244 10530 1  
Donor1-TTTCCTCTCCGTTGTC-2 3086 6311 2  
Donor1-TTTCCTCTCGTACGGC-2 2178 5796 6  
Donor1-TTTGCGCAGGCTCTTA-2 3088 10971 10  
Donor1-TTTGCGCTCTCAAACG-2 2391 9978 9  
Donor1-TTTGGTTCACCCATGG-2 4501 11400 5  
Donor1-TTTGGTTGTTAAGAAC-2 2601 5872 1  
Donor1-TTTGGTTTCTGCGGCA-2 2113 6163 13  
Donor1-TTTGTCAAGAACTCGG-2 2734 5652 6  
Donor1-TTTGTCAAGGATGGTC-2 3099 5943 2  
Donor1-TTTGTCAGTAAGGGAA-2 7531 59912 4  
Donor1-TTTGTCAGTGTGCGTC-2 1720 6499 13  
Donor1-TTTGTCATCCAAACTG-2 3112 5913 5
