# Supplementary material for: The adult human testis transcriptional cell atlas
Source: PubMed Central journal article supplement (PMC6274646; doi:10.1038/s41422-018-0099-2), 2018-10-12
Supplement: 41422_2018_99_MOESM10_ESM.pdf [file 41422_2018_99_MOESM10_ESM.pdf]

Supplementary information, Table S2: K-means Clustering of Genes that Show Differential Expression along Germ Cell Development.

Gene Cluster  
SELM Cluster1  
PPDPF Cluster1  
PHPT1 Cluster1  
GAPDH Cluster1  
FKBP8 Cluster1  
FTL Cluster1  
AK5 Cluster1  
MIF Cluster1  
PSMA7 Cluster1  
DCAF12 Cluster1  
KANSL1 Cluster1  
TMEM14C Cluster1  
TUBB Cluster1  
GRN Cluster1  
CRIP2 Cluster1  
CCDC109B Cluster1  
AKR1B1 Cluster1  
TJP1 Cluster1  
RARS Cluster1  
CPEB1 Cluster1  
NT5DC1 Cluster1  
MTPN Cluster1  
RALY Cluster1  
FMR1 Cluster1  
THAP4 Cluster1  
AKIRIN2 Cluster1  
TANC2 Cluster1  
LIN7B Cluster1  
TKT Cluster1  
ARID4A Cluster1  
CDC123 Cluster1  
ZBTB43 Cluster1  
PTRHD1 Cluster1  
RAB11B Cluster1  
WWP1 Cluster1  
MGMT Cluster1  
RPL22L1 Cluster1  
TADA3 Cluster1  
PIAS4 Cluster1  
CDC42BPA Cluster1  
FAM150B Cluster1  
SMS Cluster1  
RPL36 Cluster1  
RPLP0 Cluster1  
RPS18 Cluster1  
RPS19 Cluster1  
RPS16 Cluster1  
SOX4 Cluster1  
RHOXF1 Cluster1  
RPL13A Cluster1  
SOD1 Cluster1  
ASB9 Cluster1  
PTGES2 Cluster1  
RPS23 Cluster1

MARCKSL1 Cluster1  
GTF3A Cluster1  
ELAVL2 Cluster1  
RPL39 Cluster1  
RPL12 Cluster1  
HSPB1 Cluster1  
RPL14 Cluster1  
YWHAB Cluster1  
TBCB Cluster1  
PSIP1 Cluster1  
PDLIM1 Cluster1  
GSTP1 Cluster1  
GADD45GIP1 Cluster1  
TUBA1B Cluster1  
APEX1 Cluster1  
MAGEB2 Cluster1  
ATIC Cluster1  
RPS29 Cluster1  
PABPC4 Cluster1  
ATP1B1 Cluster1  
RPS11 Cluster1  
IGFBP2 Cluster1  
CDCA7L Cluster1  
BEND4 Cluster1  
COPS6 Cluster1  
AKR1A1 Cluster1  
NME4 Cluster1  
MTCH1 Cluster1  
MPG Cluster1  
LPIN2 Cluster1  
RPL26 Cluster1  
SLC25A6 Cluster1  
NAB1 Cluster1  
BOP1 Cluster1  
NME3 Cluster1  
DSCC1 Cluster1  
TEAD1 Cluster1  
ITGB1 Cluster1  
EEF1B2 Cluster1  
POLRMT Cluster1  
CCDC12 Cluster1  
PLPP2 Cluster1  
TAF6 Cluster1  
NFIC Cluster1  
RPL27 Cluster1  
RBMX2 Cluster1  
BARD1 Cluster1  
TGIF2 Cluster1  
NEIL2 Cluster1  
PPP2R1A Cluster1  
LRRFIP1 Cluster1  
HCFC1R1 Cluster1  
TWF2 Cluster1  
ZFP36L2 Cluster1  
RASSF3 Cluster1  
RPS5 Cluster1

POGZ Cluster1  
GMDS Cluster1  
BNIP3 Cluster1  
GAMT Cluster1  
PDCL3 Cluster1  
HEBP2 Cluster1  
INSIG1 Cluster1  
GOLIM4 Cluster1  
C12orf49 Cluster1  
TXNIP Cluster1  
APOO Cluster1  
CNFN Cluster1  
BRMS1 Cluster1  
JARID2 Cluster1  
LLGL2 Cluster1  
DLK1 Cluster1  
ANXA11 Cluster1  
LRRC42 Cluster1  
TSR3 Cluster1  
RNF219 Cluster1  
SSRP1 Cluster1  
HDAC5 Cluster1  
SRP72 Cluster1  
PTMS Cluster1  
NUDT14 Cluster1  
RPL4 Cluster1  
LUZP4 Cluster1  
ADGRL1 Cluster1  
TMEM123 Cluster1  
CAPG Cluster1  
MCUR1 Cluster1  
EIF4EBP1 Cluster1  
UXS1 Cluster1  
PHF13 Cluster1  
MCRS1 Cluster1  
AC013461.1 Cluster1  
HOXB7 Cluster1  
BIRC2 Cluster1  
ARPC4 Cluster1  
TNNT1 Cluster1  
PELI2 Cluster1  
COX6B1 Cluster1  
STRN4 Cluster1  
CCDC88C Cluster1  
TCEAL4 Cluster1  
THAP1 Cluster1  
RGMA Cluster1  
TOP1MT Cluster1  
SH3BGRL3 Cluster1  
AGAP1 Cluster1  
ZMYND8 Cluster1  
RPL38 Cluster1  
MAP2K7 Cluster1  
ACTR2 Cluster1  
SNF8 Cluster1  
ATAD3A Cluster1

MAP7D3 Cluster1  
RYK Cluster1  
ZFHX3 Cluster1  
SDC2 Cluster1  
NUDT15 Cluster1  
DND1 Cluster1  
JRK Cluster1  
CHTF8 Cluster1  
MIER2 Cluster1  
LSM10 Cluster1  
C12orf45 Cluster1  
GNB2 Cluster1  
UROS Cluster1  
GTDC1 Cluster1  
TATDN1 Cluster1  
ENAH Cluster1  
RCE1 Cluster1  
NTHL1 Cluster1  
ZFAS1 Cluster1  
ATE1 Cluster1  
KLHL35 Cluster1  
REST Cluster1  
PDLIM7 Cluster1  
OTUB1 Cluster1  
C19orf24 Cluster1  
CCDC127 Cluster1  
BRD2 Cluster1  
SPTAN1 Cluster1  
HPS4 Cluster1  
SCO2 Cluster1  
MYCBP Cluster1  
RIT1 Cluster1  
STAMBP Cluster1  
MIIP Cluster1  
FAM195B Cluster1  
PPP2R2A Cluster1  
NDUFAF6 Cluster1  
SSU72 Cluster1  
ENO1 Cluster1  
ARMC6 Cluster1  
GTF2I Cluster1  
ECHS1 Cluster1  
ATP5D Cluster1  
INTS10 Cluster1  
TNRC6B Cluster1  
CCDC6 Cluster1  
SLC41A3 Cluster1  
C19orf53 Cluster1  
SMAD2 Cluster1  
XAB2 Cluster1  
ATP1A1 Cluster1  
TUFM Cluster1  
ASPSCR1 Cluster1  
BLOC1S1 Cluster1  
MIB2 Cluster1  
TPM3 Cluster1

POLD2 Cluster1  
PIWIL2 Cluster1  
DDX43 Cluster1  
EPC1 Cluster1  
LBR Cluster1  
GALNS Cluster1  
KAT6B Cluster1  
TDRD1 Cluster1  
NUTM2B-AS1 Cluster1  
DAZAP2 Cluster1  
UACA Cluster1  
CBL Cluster1  
PABPN1 Cluster1  
NDUFS4 Cluster1  
PCSK1N Cluster1  
ERCC1 Cluster1  
AP2S1 Cluster1  
RPS4X Cluster1  
GNB2L1 Cluster1  
ZNF428 Cluster1  
LMO4 Cluster1  
TPT1 Cluster1  
GLTSCR2 Cluster1  
SERPINE2 Cluster1  
TCF3 Cluster1  
SIX1 Cluster1  
UTF1 Cluster1  
ID4 Cluster1  
L1TD1 Cluster1  
ID1 Cluster1  
USP11 Cluster1  
LY6E Cluster1  
AES Cluster1  
RPL11 Cluster1  
THRA Cluster1  
IRF2BPL Cluster1  
COTL1 Cluster1  
KRT18 Cluster1  
STK24 Cluster1  
RAC3 Cluster1  
PMAIP1 Cluster1  
NOC4L Cluster1  
PALM3 Cluster1  
ID2 Cluster1  
FAM26F Cluster1  
MYO6 Cluster1  
RHOC Cluster1  
TMEM14A Cluster1  
TOMM34 Cluster1  
PKN1 Cluster1  
FGFR3 Cluster1  
TLK1 Cluster1  
ADAR Cluster1  
DPPA2 Cluster1  
SSBP3 Cluster1  
C1QTNF4 Cluster1

YPEL2 Cluster1  
SUPT5H Cluster1  
SERPINI1 Cluster1  
MEF2C Cluster1  
FST Cluster1  
RBFOX3 Cluster1  
NFKBIA Cluster1  
CCDC106 Cluster1  
RPL37 Cluster1  
FSD1 Cluster1  
NPB Cluster1  
BLVRA Cluster1  
RABGGTA Cluster1  
KLHL23 Cluster1  
PRR5 Cluster1  
C19orf84 Cluster1  
DTNB Cluster1  
DUSP5 Cluster1  
LY6H Cluster1  
CITED2 Cluster1  
GCNT2 Cluster1  
C12orf75 Cluster1  
PODXL2 Cluster1  
RAB6B Cluster1  
BMPR1B Cluster1  
FAM43A Cluster1  
SMARCA1 Cluster1  
IDH2 Cluster1  
GABRB3 Cluster1  
MXD4 Cluster1  
TCF7L2 Cluster1  
KDM1B Cluster1  
LINC01511 Cluster1  
TSPAN13 Cluster1  
DPPA4 Cluster1  
CLN6 Cluster1  
SMAD9 Cluster1  
KCNQ2 Cluster1  
TUBA1A Cluster1  
SNAPC2 Cluster1  
ENHO Cluster1  
NPW Cluster1  
MFHAS1 Cluster1  
ZFAND2B Cluster1  
TMEM55A Cluster1  
CDK17 Cluster1  
STX3 Cluster1  
CRTAP Cluster1  
HEY1 Cluster1  
SPOCD1 Cluster1  
EYA2 Cluster1  
HACD4 Cluster1  
MDFI Cluster1  
PIWIL4 Cluster1  
ELMSAN1 Cluster1  
PARD3 Cluster1

LRIG1 Cluster1  
VIPR2 Cluster1  
RAB5C Cluster1  
RNF187 Cluster1  
BNC2 Cluster1  
ST3GAL4 Cluster1  
BFSP1 Cluster1  
ATP9A Cluster1  
PCMTD1 Cluster1  
SIAH2 Cluster1  
IFI16 Cluster1  
NFIB Cluster1  
EGR4 Cluster1  
BAIAP2 Cluster1  
CEBPD Cluster1  
UPP1 Cluster1  
NEDD4L Cluster1  
CAPRIN2 Cluster1  
TMEM251 Cluster1  
RALA Cluster1  
CNTNAP2 Cluster1  
CCNJL Cluster1  
BOK Cluster1  
IGLON5 Cluster1  
EIF3L Cluster1  
HOXC9 Cluster1  
KCTD13 Cluster1  
RPS10 Cluster1  
CLTB Cluster1  
ASCL2 Cluster1  
RNF130 Cluster1  
DMAP1 Cluster1  
FAM25G Cluster1  
FHL3 Cluster1  
DPYSL2 Cluster1  
HNRNPH2 Cluster1  
SCT Cluster1  
SAMD11 Cluster1  
RP11-395G23.3 Cluster1  
BLMH Cluster1  
TRIM71 Cluster1  
CHEK2 Cluster1  
SERTAD4-AS1 Cluster1  
RAB20 Cluster1  
NANOS3 Cluster1  
ANKRD37 Cluster1  
SMARCD3 Cluster1  
CAMK2G Cluster1  
MB21D2 Cluster1  
STX7 Cluster1  
MRPL37 Cluster1  
RP11-70C1.1 Cluster1  
UBA1 Cluster1  
RP11-307P5.1 Cluster1  
BAMBI Cluster1  
ZNF462 Cluster1

LTBP1 Cluster1  
TPM2 Cluster1  
ADCK3 Cluster1  
MROH6 Cluster1  
AC002454.1 Cluster1  
SSBP2 Cluster1  
WIPF3 Cluster1  
PFKL Cluster1  
FAM21A Cluster1  
PAK4 Cluster1  
ELK3 Cluster1  
PHF6 Cluster1  
SHKBP1 Cluster1  
RGS10 Cluster1  
PLPPR5 Cluster1  
RGS14 Cluster1  
ROR2 Cluster1  
RP11-161M6.2 Cluster1  
TBL1X Cluster1  
HES1 Cluster1  
ZDHHC21 Cluster1  
ANXA5 Cluster1  
PALM Cluster1  
CEBPB Cluster1  
LMO2 Cluster1  
LINC01582 Cluster1  
GPC1 Cluster1  
DEAF1 Cluster1  
VGLL4 Cluster1  
NREP Cluster1  
PRKAG2 Cluster1  
LINC01030 Cluster1  
RGS17 Cluster1  
SF3A2 Cluster1  
AGAP3 Cluster1  
LINC01481 Cluster1  
NRG2 Cluster1  
TCL1B Cluster1  
FAT1 Cluster1  
SESN2 Cluster1  
AIP Cluster1  
SCARB2 Cluster1  
PRDX3 Cluster1  
REEP2 Cluster1  
RNASET2 Cluster1  
GAN Cluster1  
IMPDH1 Cluster1  
PSME1 Cluster1  
SPTLC2 Cluster1  
DCTN4 Cluster1  
SERINC5 Cluster1  
B3GALNT1 Cluster1  
ARRDC4 Cluster1  
IFNAR2 Cluster1  
NR1D1 Cluster1  
AC018755.17 Cluster1



AK4 Cluster1  
SSFA2 Cluster1  
PTPRS Cluster1  
PLS3 Cluster1  
SEPP1 Cluster1  
PTPN14 Cluster1  
CXCL9 Cluster1  
TNFAIP8 Cluster1  
MLLT3 Cluster1  
TLL1 Cluster1  
CHD7 Cluster1  
CERS6 Cluster1  
NAB2 Cluster1  
ATXN1 Cluster1  
GPM6B Cluster1  
ERI1 Cluster1  
ATP6V0E2 Cluster1  
TCN2 Cluster1  
SMIM10L1 Cluster1  
GSDMD Cluster1  
NEK6 Cluster1  
PQBP1 Cluster1  
ZNF134 Cluster1  
CLEC11A Cluster1  
GFRA1 Cluster1  
TMSB15A Cluster1  
BCAM Cluster1  
PDZD11 Cluster1  
ZNF581 Cluster1  
DRAM2 Cluster1  
SUSD4 Cluster1  
SNX18 Cluster1  
TLN2 Cluster1  
PCLO Cluster1  
AZU1 Cluster1  
SNHG19 Cluster1  
SERINC2 Cluster1  
MAL2 Cluster1  
PRKX Cluster1  
APBB1 Cluster1  
OGFR Cluster1  
COBL Cluster1  
LIMK1 Cluster1  
EPHX2 Cluster1  
UNC119 Cluster1  
CAMK2B Cluster1  
TACC2 Cluster1  
TRAF7 Cluster1  
TRPM4 Cluster1  
DLX5 Cluster1  
FAM89A Cluster1  
KLF7 Cluster1  
RP11-506F3.1 Cluster1  
SFXN1 Cluster1  
ZNF787 Cluster1  
SYNE2 Cluster1

CADM2 Cluster1  
ANKRD27 Cluster1  
FAM50A Cluster1  
CMTM7 Cluster1  
DBN1 Cluster1  
YPEL3 Cluster1  
RPP40 Cluster1  
Clorf233 Cluster1  
GTPBP6 Cluster1  
MT-ATP8 Cluster1  
ELOVL4 Cluster1  
SATB1 Cluster1  
ZGLP1 Cluster1  
RBBP5 Cluster1  
THAP3 Cluster1  
IL27RA Cluster1  
RBP4 Cluster1  
SCPEP1 Cluster1  
SERPING1 Cluster1  
KIAA1958 Cluster1  
FGFR1 Cluster1  
NBL1 Cluster1  
TJP2 Cluster1  
PPCS Cluster1  
DSCR3 Cluster1  
ZNF701 Cluster1  
ANP32A Cluster1  
VPS37D Cluster1  
ZEB2 Cluster1  
GNAL Cluster1  
PDCL Cluster1  
C17orf49 Cluster1  
MINK1 Cluster1  
RP11-973H7.1 Cluster1  
SOX17 Cluster1  
DGKD Cluster1  
STXBP3 Cluster1  
SERTAD3 Cluster1  
CBR1 Cluster1  
MGST3 Cluster1  
PPP1R1A Cluster1  
CAB39 Cluster1  
KCTD2 Cluster1  
TMEM181 Cluster1  
MARK4 Cluster1  
USP12 Cluster1  
SP3 Cluster1  
HSD17B11 Cluster1  
SPR Cluster1  
MIR22HG Cluster1  
ACAP3 Cluster1  
CD151 Cluster1  
CRIM1 Cluster1  
TSPAN14 Cluster1  
CNTNAP3B Cluster1  
NANOS2 Cluster1

RFXANK Cluster1  
JAK1 Cluster1  
MAGEB16 Cluster1  
TNIP1 Cluster1  
SLC9A3R2 Cluster1  
NINJ1 Cluster1  
RGS2 Cluster1  
PPP2R2D Cluster1  
FGFR2 Cluster1  
DYRK1A Cluster1  
TTC9C Cluster1  
RPL17 Cluster1  
SFRP1 Cluster1  
TFAP2A Cluster1  
IRF2BP2 Cluster1  
NUDT7 Cluster1  
RASL11B Cluster1  
SMARCD2 Cluster1  
PCAT7 Cluster1  
JADE1 Cluster1  
CACFD1 Cluster1  
SPSB3 Cluster1  
NUDT11 Cluster1  
STAT1 Cluster1  
RPUSD2 Cluster1  
ECI2 Cluster1  
ZNF516 Cluster1  
APBA2 Cluster1  
WDR13 Cluster1  
KAT2A Cluster1  
SPRY1 Cluster1  
SETD1A Cluster1  
SH2B2 Cluster1  
MPDZ Cluster1  
BAG6 Cluster1  
TMEM39B Cluster1  
TMEM219 Cluster1  
TPBG Cluster1  
RP5-1085F17.3 Cluster1  
CTC-241N9.1 Cluster1  
11-Sep Cluster1  
GNB4 Cluster1  
ARPC1B Cluster1  
MLYCD Cluster1  
COMMD5 Cluster1  
CHN1 Cluster1  
KLHL42 Cluster1  
NIT2 Cluster1  
RAB4B Cluster1  
VPS26B Cluster1  
BRMS1L Cluster1  
FYN Cluster1  
ASPH Cluster1  
RBM38 Cluster1  
ZNF322 Cluster1  
SKI Cluster1

PREX1 Cluster1  
RUNX1T1 Cluster1  
RP11-11N9.4 Cluster1  
ZRSR2 Cluster1  
DEDD2 Cluster1  
FN1 Cluster1  
GNAQ Cluster1  
GNG12 Cluster1  
ZDHHC14 Cluster1  
AIG1 Cluster1  
FAM178B Cluster1  
DAB2IP Cluster1  
LSR Cluster1  
RNF213 Cluster1  
PHF21A Cluster1  
NFIA Cluster1  
CTXN1 Cluster1  
ACTN1 Cluster1  
DUSP23 Cluster1  
IRX2 Cluster1  
MYO10 Cluster1  
DYRK2 Cluster1  
LEPROT Cluster1  
AATF Cluster1  
DLST Cluster1  
PDK2 Cluster1  
CYFIP1 Cluster1  
ZNF16 Cluster1  
SGK3 Cluster1  
AFF1 Cluster1  
UGCG Cluster1  
PRMT7 Cluster1  
SWSAP1 Cluster1  
MIPEP Cluster1  
CCDC94 Cluster1  
UBE2L6 Cluster1  
FOXP4 Cluster1  
PPP2R5D Cluster1  
ADNP Cluster1  
WASL Cluster1  
PEX2 Cluster1  
ASUN Cluster1  
CUL4A Cluster1  
PYM1 Cluster1  
LCMT1 Cluster1  
FAM13A Cluster1  
9-Sep Cluster1  
RHOBTB3 Cluster1  
CLASP1 Cluster1  
VAT1 Cluster1  
PPP2R3A Cluster1  
ZBTB16 Cluster1  
CIART Cluster1  
CSNK1E Cluster1  
MRAS Cluster1  
HIP1R Cluster1

TIAM1 Cluster1  
IL13RA1 Cluster1  
DOCK8 Cluster1  
MBNL1 Cluster1  
PRKCI Cluster1  
AP001372.2 Cluster1  
IRF3 Cluster1  
PRR14L Cluster1  
BTBD3 Cluster1  
RECQL Cluster1  
MED27 Cluster1  
RABL6 Cluster1  
LZTS2 Cluster1  
XPOT Cluster1  
ADI1 Cluster1  
KLC3 Cluster1  
LCA5 Cluster1  
SIRT5 Cluster1  
CEP131 Cluster1  
FAM21C Cluster1  
SLC25A26 Cluster1  
TRIM27 Cluster1  
AKT1S1 Cluster1  
RNF146 Cluster1  
STXBP6 Cluster1  
ST20 Cluster1  
PRRC2B Cluster1  
B4GALT2 Cluster1  
YARS2 Cluster1  
BAG3 Cluster1  
PQLC3 Cluster1  
LIG1 Cluster1  
ASCC1 Cluster1  
ISG15 Cluster1  
HRSP12 Cluster1  
DUSP4 Cluster1  
USP19 Cluster1  
ISL1 Cluster1  
GUK1 Cluster1  
NAA60 Cluster1  
SMIM1 Cluster1  
BBS2 Cluster1  
USP36 Cluster1  
RP11-128M1.1 Cluster1  
SLC25A1 Cluster1  
OSTF1 Cluster1  
ZNF414 Cluster1  
GPT2 Cluster1  
ZNF444 Cluster1  
KRT8 Cluster1  
C11orf68 Cluster1  
TXNRD1 Cluster1  
SLC25A13 Cluster1  
KBTBD4 Cluster1  
2-Mar Cluster1  
PHC1 Cluster1

SLC35A1 Cluster1  
AGL Cluster1  
RP11-693J15.6 Cluster1  
ADAMTS6 Cluster1  
CYBA Cluster1  
NCK2 Cluster1  
ZNF90 Cluster1  
TPTEP1 Cluster1  
FKBP5 Cluster1  
CDYL2 Cluster1  
ZNF217 Cluster1  
CDC34 Cluster1  
DCP1A Cluster1  
CCDC71 Cluster1  
POMGNT2 Cluster1  
PHGDH Cluster1  
SAMM50 Cluster1  
CCDC144NL-AS1 Cluster1  
ZC3H3 Cluster1  
PIK3C3 Cluster1  
A2M Cluster1  
GMPR Cluster1  
GSN Cluster1  
BCAR1 Cluster1  
STK38L Cluster1  
SAP30BP Cluster1  
CPNE1 Cluster1  
BIN1 Cluster1  
C8orf82 Cluster1  
RALB Cluster1  
WDR43 Cluster1  
FLCN Cluster1  
RBKS Cluster1  
SPI1 Cluster1  
BSDC1 Cluster1  
MIF4GD Cluster1  
GTF2A1 Cluster1  
SYT14 Cluster1  
LANCL2 Cluster1  
FMN1 Cluster1  
HOPX Cluster1  
ARID3B Cluster1  
MAP3K11 Cluster1  
RAB1B Cluster1  
C1orf122 Cluster1  
LAMTOR2 Cluster1  
CD74 Cluster1  
JUND Cluster1  
PGLS Cluster1  
KIAA0232 Cluster1  
MIR4458HG Cluster1  
CD81 Cluster1  
UHMK1 Cluster1  
PRDX6 Cluster1  
PINX1 Cluster1  
HEY2 Cluster1

ITGA6 Cluster1  
RBCK1 Cluster1  
AHCY Cluster1  
BRD4 Cluster1  
UQCRC1 Cluster1  
MGAT1 Cluster1  
KDM2B Cluster1  
MLST8 Cluster1  
VIM Cluster1  
TMEM189 Cluster1  
DLGAP4 Cluster1  
ETV5 Cluster1  
LAMP1 Cluster1  
FBXO7 Cluster1  
AP2A1 Cluster1  
PTGDS cluster10  
LYPLA1 cluster10  
PSPH cluster10  
CCDC168 cluster10  
DNAJB7 cluster10  
WDR74 cluster10  
C10orf120 cluster10  
TP53TG5 cluster10  
CCDC185 cluster10  
G2E3 cluster10  
RP11-166P13.4 cluster10  
TEKT5 cluster10  
C20orf173 cluster10  
PTK7 cluster10  
SLPI cluster10  
C19orf71 cluster10  
8-Mar cluster10  
CD55 cluster10  
ARID2 cluster10  
PCMT1 cluster10  
GABARAPL1 cluster10  
CREB1 cluster10  
ZNF677 cluster10  
C21orf91 cluster10  
COLCA1 cluster10  
CTD-2647E9.3 cluster10  
RP11-665J16.1 cluster10  
RP11-470L19.6 cluster10  
CA9 cluster10  
SRRM5 cluster10  
RP11-544A12.4 cluster10  
AC016912.3 cluster10  
RP5-1022J11.2 cluster10  
RP11-385M4.1 cluster10  
CTD-3035K23.7 cluster10  
LINC01377 cluster10  
PCCB cluster10  
ZNF32-AS3 cluster10  
THAP2 cluster10  
RP11-467L13.7 cluster10  
SLC25A41 cluster10

NDUFB2 cluster10  
SH3BP5 cluster10  
DCDC2C cluster10  
LPGAT1 cluster10  
RP11-313E19.2 cluster10  
CD46 cluster10  
RP11-557J10.5 cluster10  
CTB-33018.3 cluster10  
SPDYE3 cluster10  
ASGR1 cluster10  
LRRC72 cluster10  
CST8 cluster10  
CTA-243E7.1 cluster10  
WISP3 cluster10  
PEX5 cluster10  
RP11-87C7.3 cluster10  
IRF1 cluster10  
FAM170B cluster10  
MIR4307HG cluster10  
AC105339.1 cluster10  
SIRT2 cluster10  
GABBR2 cluster10  
DPY19L1 cluster10  
TUBB6 cluster10  
DXO cluster10  
LINC01467 cluster10  
CRLS1 cluster10  
AGAP4 cluster10  
RP11-478K15.7 cluster10  
LINC00358 cluster10  
LINC01523 cluster10  
RP11-49907.7 cluster10  
RP11-164023.7 cluster10  
AKNAD1 cluster10  
AC116609.1 cluster10  
PCSK2 cluster10  
LINC01001 cluster10  
RP11-839G9.1 cluster10  
CLIP4 cluster10  
TMEM150A cluster10  
SCAND1 cluster10  
ADGRG1 cluster10  
LINGO1-AS1 cluster10  
PALMD cluster10  
CHD5 cluster10  
AFAP1L1 cluster10  
RP11-862G15.1 cluster10  
TANGO6 cluster10  
MOXD1 cluster10  
RP11-644K8.1 cluster10  
KRT15 cluster10  
AP006216.5 cluster10  
DNAJB8-AS1 cluster10  
VGLL3 cluster10  
LMO1 cluster10  
CTB-91J4.1 cluster10



SPATA31D4 cluster10  
ACSS1 cluster10  
RNF125 cluster10  
LNX1-AS1 cluster10  
SMIM14 cluster10  
RP3-335N17.2 cluster10  
CEP76 cluster10  
RP11-480I12.10 cluster10  
MCF2L2 cluster10  
CFAP20 cluster10  
JRKL cluster10  
SORCS3-AS1 cluster10  
HECW1 cluster10  
SNX13 cluster10  
NPIP4 cluster10  
CAHM cluster10  
WDR26 cluster10  
RP11-140I19.1 cluster10  
PJA1 cluster10  
RP11-514F8.2 cluster10  
TRBV7-1 cluster10  
AP000345.1 cluster10  
TLR3 cluster10  
EFCAB14-AS1 cluster10  
SNX31 cluster10  
AC064834.3 cluster10  
CKB cluster10  
AC005808.3 cluster10  
ARAP1 cluster10  
GMCL1 cluster10  
TRIM11 cluster10  
SLC35A5 cluster10  
FANCC cluster10  
TROVE2 cluster10  
RP11-666O2.2 cluster10  
DYRK4 cluster10  
KLHL11 cluster10  
BAZ1A cluster10  
NPIP7 cluster10  
ZNF790 cluster10  
IQCE cluster10  
DDA1 cluster10  
AGBL1-AS1 cluster10  
ZFP42 cluster10  
RNF139-AS1 cluster10  
SHOX2 cluster10  
COQ6 cluster10  
AFF4 cluster10  
WDR37 cluster10  
ZNF330 cluster10  
LTN1 cluster10  
RP11-334J6.6 cluster10  
DKK3 cluster10  
TCF20 cluster10  
LAPTM4A cluster10  
AC004862.6 cluster10

RP11-552D8.1 cluster10  
RP11-62H20.1 cluster10  
C2orf16 cluster10  
CYP17A1 cluster10  
PLPP6 cluster10  
KB-1183D5.13 cluster10  
MEX3B cluster10  
PPP2R5E cluster10  
RP11-478H13.1 cluster10  
POPDC3 cluster10  
S100A10 cluster10  
CDADC1 cluster10  
PACRG-AS3 cluster10  
TOR1AIP1 cluster10  
ARHGEF39 cluster10  
MFSD12 cluster10  
IQCJ-SCHIP1-AS1 cluster10  
PAR3B cluster10  
AGAP9 cluster10  
ADRA1A cluster10  
RP5-1030M6.3 cluster10  
RP11-295M18.6 cluster10  
FDPS cluster10  
RP11-359G22.2 cluster10  
AGAP5 cluster10  
ASNS cluster10  
ADAMTS17 cluster10  
ZBTB1 cluster10  
AC099342.1 cluster10  
RP11-359G22.4 cluster10  
DDAH2 cluster10  
LINC01580 cluster10  
FAM153A cluster10  
RP11-114H24.3 cluster10  
RP11-179A9.3 cluster10  
MAMDC2 cluster10  
WFDC11 cluster10  
NLGN1 cluster10  
RP11-779018.3 cluster10  
CLIP1-AS1 cluster10  
ORMDL3 cluster10  
C15orf59-AS1 cluster10  
TGM7 cluster10  
AC012456.3 cluster10  
RP11-7306.3 cluster10  
MYO1D cluster10  
LINC01490 cluster10  
EIF1AX cluster10  
RP11-166B2.1 cluster10  
RP11-51J9.5 cluster10  
CDK6 cluster10  
RP11-307010.1 cluster10  
SLC36A1 cluster10  
ST7 cluster10  
RP11-696N14.1 cluster10  
KXD1 cluster10

CTC-499B15.7 cluster10  
FRMD3 cluster10  
HK2 cluster10  
RARA-AS1 cluster10  
KIZ-AS1 cluster10  
RP1-127D3.4 cluster10  
RP11-20B24.4 cluster10  
RBL2 cluster10  
RP3-453P22.2 cluster10  
EDRF1 cluster10  
MFSD6 cluster10  
LINC00442 cluster10  
AC010907.5 cluster10  
TBC1D3I cluster10  
FAM134C cluster10  
SCRT1 cluster10  
ARHGAP42 cluster10  
PPP1CB cluster10  
AC069363.1 cluster10  
RP5-1027015.1 cluster10  
PRICKLE1 cluster10  
MRRF cluster10  
SEMA3D cluster10  
DLGAP2-AS1 cluster10  
ITIH4 cluster10  
PSMD3 cluster10  
EMC10 cluster10  
RP11-340I6.7 cluster10  
RP11-108M9.3 cluster10  
RP1-111D6.2 cluster10  
LINC01082 cluster10  
RP3-333B15.4 cluster10  
LINC00906 cluster10  
C22orf31 cluster10  
FAM60A cluster10  
GCC1 cluster10  
CWC27 cluster10  
CLEC2D cluster10  
GORASP1 cluster10  
EVX1-AS cluster10  
WDR20 cluster10  
GGH cluster10  
ANKS1B cluster10  
RP11-168P8.3 cluster10  
CYB5D1 cluster10  
CAP1 cluster10  
CDC42SE1 cluster10  
ZSCAN29 cluster10  
CEP164 cluster10  
PTPN11 cluster10  
RP11-1017G21.4 cluster10  
AGAP6 cluster10  
RP11-56L13.1 cluster10  
DSCR9 cluster10  
PICK1 cluster10  
MAK cluster10

VPS53 cluster10  
TDP2 cluster10  
STK3 cluster10  
MFSD11 cluster10  
PKNOX2 cluster10  
RP11-141M1.1 cluster10  
BCL2L1 cluster10  
WBP2 cluster10  
GPD2 cluster10  
SPAG4 cluster10  
WSCD1 cluster10  
ST7-AS2 cluster10  
HIPK1-AS1 cluster10  
LRRC9 cluster10  
SPDYE1 cluster10  
WRN cluster10  
SLC25A44 cluster10  
UGT1A6 cluster10  
CSRNP1 cluster10  
PSME3 cluster10  
IDI1 cluster10  
FAHD1 cluster10  
NF1 cluster10  
CYP51A1-AS1 cluster10  
COLCA2 cluster10  
VEPH1 cluster10  
HAS2-AS1 cluster10  
CACNA2D3 cluster10  
GFOD2 cluster10  
VASH1 cluster10  
LINC01374 cluster10  
FAM109A cluster10  
SLC16A1-AS1 cluster10  
CYP51A1 cluster10  
CCNT1 cluster10  
DES cluster10  
SULT1A1 cluster10  
GSTCD cluster10  
RP11-247C2.2 cluster10  
MOCS3 cluster10  
C22orf46 cluster10  
HDAC4 cluster10  
ACAT2 cluster10  
RP11-587H10.2 cluster10  
RP11-356J5.12 cluster10  
PITRM1 cluster10  
NMNAT2 cluster10  
KLF11 cluster10  
KPNA3 cluster10  
AC073342.12 cluster10  
RP11-396F22.1 cluster10  
IFIH1 cluster10  
DDX52 cluster10  
AHCYL2 cluster10  
DNAJB4 cluster10  
RP11-522N14.2 cluster10

DGAT2 cluster10  
Clorf43 cluster10  
HEMK1 cluster10  
EVX1 cluster10  
TOPORS cluster10  
MIMT1 cluster10  
NSUN3 cluster10  
IGF2BP2 cluster10  
UFD1L cluster10  
LINC01315 cluster10  
FRMPD2 cluster10  
FAM63B cluster10  
AC011718.2 cluster10  
AMFR cluster10  
WASF3 cluster10  
RP5-864K19.4 cluster10  
MT2A cluster10  
FUT11 cluster10  
TUBG1 cluster10  
DHX33 cluster10  
BCL10 cluster10  
FAM212B cluster10  
ZCCHC6 cluster10  
MRC2 cluster10  
UBXN8 cluster10  
SUCLA2 cluster10  
RAD21L1 cluster10  
ARF4-AS1 cluster10  
PTRH1 cluster10  
REXO1 cluster10  
LRRC8B cluster10  
CLIP1 cluster10  
KCNV2 cluster10  
GS1-124K5.3 cluster10  
YWHAG cluster10  
FOXP1 cluster10  
RDH10 cluster10  
UBE2D3 cluster10  
RP11-383M4.6 cluster10  
FAM200A cluster10  
TXNDC17 cluster10  
ZDHHC6 cluster10  
AKR1E2 cluster10  
AP1AR cluster10  
EIF4G1 cluster10  
RRP1B cluster10  
RGMB cluster10  
NAPEPLD cluster10  
AMOTL1 cluster10  
CYB561A3 cluster10  
MIPOL1 cluster10  
SESN1 cluster10  
ALDH3A2 cluster10  
RAD51D cluster10  
TGFBFR1 cluster10  
MYH11 cluster10

MIEF1 cluster10  
GFER cluster10  
CENPJ cluster10  
C10orf35 cluster10  
KIAA1715 cluster10  
CDH23 cluster10  
HOOK3 cluster10  
THAP6 cluster10  
CCDC113 cluster10  
CLEC16A cluster10  
C1orf174 cluster10  
ABLIM1 cluster10  
RP11-665C16.6 cluster10  
HSDL2 cluster10  
PPP1R3E cluster10  
LRRC36 cluster10  
OTUD4 cluster10  
CDC5L cluster10  
KIZ cluster10  
ZFP36L1 cluster10  
OSER1-AS1 cluster10  
KLHL20 cluster10  
MYO15A cluster10  
MAPK8 cluster10  
CDIP1 cluster10  
AP5M1 cluster10  
EPS15L1 cluster10  
KBTBD7 cluster10  
NFX1 cluster10  
TNKS cluster10  
DHDDS cluster10  
ATMIN cluster10  
LMBR1L cluster10  
NPLOC4 cluster10  
MAFG cluster10  
ATPAF1 cluster10  
ECHDC2 cluster10  
FAM76B cluster10  
CAPZA1 cluster10  
ZSCAN5A cluster10  
ABHD2 cluster10  
UBE2R2 cluster10  
LINC00982 cluster10  
ZNF44 cluster10  
MKL1 cluster10  
TOB1 cluster10  
CSNK2A2 cluster10  
FBXO34 cluster10  
HYOU1 cluster10  
USP4 cluster10  
XPNPEP3 cluster10  
PLBD1 cluster10  
KIAA1586 cluster10  
ZCCHC2 cluster10  
ANKRD28 cluster10  
RP11-242D8.1 cluster10

CTDSPL2 cluster10  
KIF1C cluster10  
MYO19 cluster10  
SMYD2 cluster10  
NPIPA1 cluster10  
TRMT2A cluster10  
CLK3 cluster10  
GPATCH2L cluster10  
BMI1 cluster10  
SNHG9 cluster10  
MRPL57 cluster10  
ZNF451 cluster10  
ERCC4 cluster10  
C12orf73 cluster10  
RAD21 cluster10  
MCL1 cluster10  
ROCK1 cluster10  
SMAP1 cluster10  
RPRD1A cluster10  
CCDC28A cluster10  
GIGYF2 cluster10  
ZNF331 cluster10  
EFCAB13 cluster10  
FAM76A cluster10  
RIMKLB cluster10  
SLC16A1 cluster10  
ACACA cluster10  
DGCR8 cluster10  
ZCCHC8 cluster10  
ITFG2 cluster10  
G3BP2 cluster10  
SPIN1 cluster10  
PTPN20 cluster10  
MGEA5 cluster10  
NAALAD2 cluster10  
GALNT2 cluster10  
TMEM63B cluster10  
ATP1B3 cluster10  
PBX1 cluster10  
ANXA2 cluster10  
COL4A3BP cluster10  
KLF6 cluster10  
AC007557.1 Cluster11  
OTUB2 Cluster11  
TEX37 Cluster11  
ACTL9 Cluster11  
BAG1 Cluster11  
CAPZA3 Cluster11  
FUZ Cluster11  
FAM166A Cluster11  
YWHAZ Cluster11  
PFN3 Cluster11  
AC006942.4 Cluster11  
TEX36-AS1 Cluster11  
OXCT2 Cluster11  
SPANXD Cluster11

CTD-2015G9.1 Cluster11  
CCDC54 Cluster11  
SPATA3-AS1 Cluster11  
IQCF5 Cluster11  
SPANXC Cluster11  
GTF3C2-AS1 Cluster11  
SPANXB1 Cluster11  
ARMC12 Cluster11  
TNP2 Cluster11  
FHL1 Cluster11  
CXorf65 Cluster11  
ZNF295-AS1 Cluster11  
TNP1 Cluster11  
CCDC179 Cluster11  
MIR193BHG Cluster11  
IQCF2 Cluster11  
TEX35 Cluster11  
IQCF1 Cluster11  
FAM71E1 Cluster11  
SPATA24 Cluster11  
RP4-584D14.6 Cluster11  
C10orf82 Cluster11  
SLIT1-AS1 Cluster11  
SPATA19 Cluster11  
RP5-1051H14.2 Cluster11  
SPERT Cluster11  
UBE2J1 Cluster11  
HMGB4 Cluster11  
SPATA33 Cluster11  
FAM229A Cluster11  
ROPN1L Cluster11  
NFKBIB Cluster11  
HEMGN Cluster11  
RP11-168L7.3 Cluster11  
GNG2 Cluster11  
C9orf9 Cluster11  
SMIM6 Cluster11  
SBDS Cluster11  
TIMD4 Cluster11  
RP11-286O18.1 Cluster11  
TCP10L Cluster11  
RAB21 Cluster11  
IRGC Cluster11  
FGF14-AS1 Cluster11  
C2orf88 Cluster11  
MRVI1-AS1 Cluster11  
XXyac-YX155B6.5 Cluster11  
RP11-619L12.4 Cluster11  
ROPN1B Cluster11  
C17orf105 Cluster11  
TUBA4A Cluster11  
FLJ27354 Cluster11  
SCP2D1 Cluster11  
TBX18-AS1 Cluster11  
LINC01350 Cluster11  
CALM3 Cluster11



RP11-597D13.8 Cluster11  
CNN1 Cluster11  
CEP112 Cluster11  
FBL Cluster11  
FAM81B Cluster11  
EDRF1-AS1 Cluster11  
GSTK1 Cluster11  
GTSF1L Cluster11  
RP11-768G7.2 Cluster11  
IFT172 Cluster11  
ACP1 Cluster11  
CYLC2 Cluster11  
KB-1083B1.1 Cluster11  
FBXO39 Cluster11  
DNAJA4 Cluster11  
FHL5 Cluster11  
MIR7515HG Cluster11  
PRKAR2A Cluster11  
DNALI1 Cluster11  
MSMP Cluster11  
EIF5A2 Cluster11  
RP11-251P6.1 Cluster11  
CEP295NL Cluster11  
TFAM Cluster11  
ATAD1 Cluster11  
LINC00226 Cluster11  
IFT57 Cluster11  
APOPT1 Cluster11  
POLR2I Cluster11  
S100A11 Cluster11  
COX8C Cluster11  
RP5-971N18.3 Cluster11  
SPATA32 Cluster11  
MS4A5 Cluster11  
FAM71F1 Cluster11  
RNF151 Cluster11  
RP11-197N18.7 Cluster11  
SPA17 Cluster11  
FAM205C Cluster11  
Clorf100 Cluster11  
ZNF345 Cluster11  
KIF2B Cluster11  
ARHGAP26-AS1 Cluster11  
HOOK1 Cluster11  
DYNLL2 Cluster11  
SPATA7 Cluster11  
PRRX1 Cluster11  
RP11-758P17.3 Cluster11  
TSKS Cluster11  
GID4 Cluster11  
ZNF91 Cluster11  
FANCD2OS Cluster11  
GAS8 Cluster11  
ARPC5L Cluster11  
IPO5 Cluster11  
FAM104A Cluster11

RP11-958J22.3 Cluster11  
EFCAB1 Cluster11  
RP11-215E13.1 Cluster11  
AKIRIN1 Cluster11  
RP11-80B9.4 Cluster11  
CBY3 Cluster11  
MEA1 Cluster11  
LINC01333 Cluster11  
SOCS7 Cluster11  
TSC22D1 Cluster11  
RP11-38C18.3 Cluster11  
LKAAEAR1 Cluster11  
WDR1 Cluster11  
AC007163.6 Cluster11  
SIRPD Cluster11  
GSTO2 Cluster11  
RP11-232C2.2 Cluster11  
GOSR2 Cluster11  
BAG5 Cluster11  
CCSER1 Cluster11  
ZNF683 Cluster11  
RP11-152O14.4 Cluster11  
RNF133 Cluster11  
TIAM2 Cluster11  
LINC01255 Cluster11  
EWSAT1 Cluster11  
POLR3C Cluster11  
SLC25A37 Cluster11  
VPS45 Cluster11  
EEF2KMT Cluster11  
RP13-436F16.1 Cluster11  
RP11-369E15.4 Cluster11  
CLK4 Cluster11  
YPEL1 Cluster11  
TTL2 Cluster11  
ZBTB20-AS1 Cluster11  
KIF5C Cluster11  
RP11-102C16.3 Cluster11  
C3orf30 Cluster11  
NAA38 Cluster11  
RFPL3S Cluster11  
RP11-180C1.1 Cluster11  
GPRC5B Cluster11  
INPP1 Cluster11  
RP11-420J11.2 Cluster11  
GOLM1 Cluster11  
GRID2 Cluster11  
RP11-12M5.1 Cluster11  
VPS13A-AS1 Cluster11  
RP11-834C11.5 Cluster11  
ATP6V1A Cluster11  
CELA3B Cluster11  
LINC00927 Cluster11  
RP13-401N8.1 Cluster11  
RP5-1002M8.4 Cluster11  
AC079779.5 Cluster11

OVOL1-AS1 Cluster11  
BPI Cluster11  
CCDC159 Cluster11  
C8orf74 Cluster11  
TXNDC8 Cluster11  
MAPT Cluster11  
LPAR6 Cluster11  
BCAT1 Cluster11  
CDV3 Cluster11  
ANKEF1 Cluster11  
SPANXN4 Cluster11  
FABP12 Cluster11  
RASSF8 Cluster11  
RP11-165M1.3 Cluster11  
FAM71C Cluster11  
RP11-27M9.1 Cluster11  
CTD-2118P12.1 Cluster11  
LINC01548 Cluster11  
CATSPERD Cluster11  
RP11-664D1.1 Cluster11  
RP11-374M1.3 Cluster11  
C1QTNF3 Cluster11  
PPP1R7 Cluster11  
AC007131.2 Cluster11  
CAPN2 Cluster11  
LINC01430 Cluster11  
TLE4 Cluster11  
SSX2IP Cluster11  
CEP350 Cluster11  
RP11-34D15.2 Cluster11  
RP11-158I23.1 Cluster11  
PRRX2-AS1 Cluster11  
ISCA1 Cluster11  
ASTN2 Cluster11  
FAM71D Cluster11  
RP11-369E15.3 Cluster11  
FOXP1-AS1 Cluster11  
RP11-456H18.1 Cluster11  
RP11-21B23.3 Cluster11  
LINC01233 Cluster11  
RP11-17A4.3 Cluster11  
EHBP1 Cluster11  
TTC39A Cluster11  
RP3-331H24.5 Cluster11  
PCAT6 Cluster11  
TEPP Cluster11  
FAM182B Cluster11  
RNF139 Cluster11  
LINC01277 Cluster11  
RP11-399E6.1 Cluster11  
ABCC3 Cluster11  
CTD-2666L21.1 Cluster11  
LINC00929 Cluster11  
CDC14A Cluster11  
CFAP44-AS1 Cluster11  
S100A8 Cluster11

LINC01539 Cluster11  
KNSTRN Cluster11  
PDE1A Cluster11  
C12orf42 Cluster11  
SNAP23 Cluster11  
RP1-140J1.1 Cluster11  
C17orf112 Cluster11  
GSKIP Cluster11  
PRKCE Cluster11  
PLAC8L1 Cluster11  
AC016738.3 Cluster11  
C20orf85 Cluster11  
RP11-319E16.1 Cluster11  
ARL2BP Cluster11  
RP11-734K2.4 Cluster11  
ARHGAP28 Cluster11  
MKRN2 Cluster11  
CELA3A Cluster11  
NLK Cluster11  
AC008694.3 Cluster11  
AC002465.2 Cluster11  
LINC00944 Cluster11  
LINC00919 Cluster11  
SERPINB6 Cluster11  
C18orf32 Cluster11  
PAGE3 Cluster11  
DNPEP Cluster11  
MTFR1 Cluster11  
RP3-399L15.3 Cluster11  
RP11-547D23.1 Cluster11  
CCDC180 Cluster11  
TRIM42 Cluster11  
RP11-411H5.1 Cluster11  
PKIB Cluster11  
RAB3IL1 Cluster11  
PLCE1-AS2 Cluster11  
MAPRE3 Cluster11  
RP11-778H2.1 Cluster11  
RP1-17K7.3 Cluster11  
LINC00293 Cluster11  
GPR182 Cluster11  
AGPAT2 Cluster11  
LINC00935 Cluster11  
CTD-2143L24.1 Cluster11  
CES1 Cluster11  
HERPUD2 Cluster11  
ARAP2 Cluster11  
FREM1 Cluster11  
CTNNA3 Cluster11  
SCLY Cluster11  
RGS6 Cluster11  
SERGEF Cluster11  
RP11-17A4.2 Cluster11  
ELL Cluster11  
AGPAT3 Cluster11  
MICAL2 Cluster11

CSNK1G2-AS1 Cluster11  
FAM183A Cluster11  
LSM12 Cluster11  
CTD-2071N1.1 Cluster11  
RP11-281P23.2 Cluster11  
C6orf89 Cluster11  
RP11-347D21.1 Cluster11  
ZNF75D Cluster11  
SFXN5 Cluster11  
KIFC3 Cluster11  
RP5-845O24.8 Cluster11  
NTMT1 Cluster11  
ROR1-AS1 Cluster11  
CPEB3 Cluster11  
C6orf163 Cluster11  
ENOX1 Cluster11  
RP11-24D15.1 Cluster11  
RP11-201M22.1 Cluster11  
RP11-85L21.4 Cluster11  
LINC01364 Cluster11  
FAM181A-AS1 Cluster11  
CTC-360P9.4 Cluster11  
DCAF6 Cluster11  
VARS Cluster11  
RP11-292B1.2 Cluster11  
LARP1B Cluster11  
PPM1J Cluster11  
PDXDC1 Cluster11  
LINC00162 Cluster11  
RP11-421P23.1 Cluster11  
FAM71A Cluster11  
FAM71B Cluster11  
PRSS58 Cluster11  
PRSS37 Cluster11  
C20orf144 Cluster11  
CCDC80 Cluster11  
IQCF6 Cluster11  
CMTM2 Cluster11  
RP11-140K17.3 Cluster11  
DKKL1 Cluster11  
MEX3C Cluster11  
FBXO24 Cluster11  
TMEM191B Cluster11  
H2AFJ Cluster11  
TBC1D26 Cluster11  
NDNF Cluster11  
FAM134B Cluster11  
WDR64 Cluster11  
MAPK3 Cluster11  
ACSL1 Cluster11  
RORA Cluster11  
RP11-526P6.1 Cluster11  
RP11-519M16.1 Cluster11  
RP11-367J7.3 Cluster11  
RP11-76E17.3 Cluster11  
LINC00448 Cluster11

AC113607.2 Cluster11  
RP11-483P21.6 Cluster11  
RP11-404L6.2 Cluster11  
DRICH1 Cluster11  
DCC Cluster11  
CTD-2020K17.4 Cluster11  
RP11-415D17.3 Cluster11  
RP11-543H12.1 Cluster11  
TMEM205 Cluster11  
LINC00494 Cluster11  
RP11-190D6.2 Cluster11  
RP11-73E17.2 Cluster11  
RP11-6F2.5 Cluster11  
GPR18 Cluster11  
RP1-27K12.4 Cluster11  
LINC00616 Cluster11  
ZNRD1-AS1 Cluster11  
RP11-152O14.1 Cluster11  
RP4-737E23.2 Cluster11  
HPCA Cluster11  
RP11-112L6.3 Cluster11  
AC009158.1 Cluster11  
CTB-174D11.1 Cluster11  
SLC37A1 Cluster11  
SPATA45 Cluster11  
RP11-188C12.3 Cluster11  
ITPR3 Cluster11  
AGT Cluster11  
KIAA1211 Cluster11  
RP11-161D15.1 Cluster11  
MIR3976HG Cluster11  
CDKN1C Cluster11  
RP11-846C15.2 Cluster11  
LINC01214 Cluster11  
SRD5A2 Cluster11  
SUFU Cluster11  
BMP8B Cluster11  
TP53INP2 Cluster11  
MIR762HG Cluster11  
PIFO Cluster11  
SLC1A2 Cluster11  
EAF1 Cluster11  
OSBPL10-AS1 Cluster11  
ADGRL3-AS1 Cluster11  
C10orf90 Cluster11  
THAP5 Cluster11  
CTD-2144E22.8 Cluster11  
ABHD16B Cluster11  
INPP4B Cluster11  
MATN2 Cluster11  
RP11-101E7.2 Cluster11  
DPY19L2 Cluster11  
RAI14 Cluster11  
GRB10 Cluster11  
EPB41L3 Cluster11  
IGSF11 Cluster11

EFCAB6 Cluster11  
RP11-379H18.1 Cluster11  
RP11-63A1.2 Cluster11  
RP11-774D14.1 Cluster11  
VSTM4 Cluster11  
RP11-883G14.2 Cluster11  
DNAAF3 Cluster11  
APLF Cluster11  
LDLRAD4 Cluster11  
AL157902.3 Cluster11  
FER Cluster11  
FAM53C Cluster11  
GNAI2 Cluster11  
SUN1 Cluster11  
SGF29 Cluster11  
ZNF487 Cluster11  
SYAP1 Cluster11  
SPIRE1 Cluster11  
NDUFV2-AS1 Cluster11  
PRKAA1 Cluster11  
C12orf10 Cluster11  
RP11-755O11.2 Cluster11  
SURF2 Cluster11  
SPATA3 Cluster12  
DCUN1D1 Cluster12  
LELP1 Cluster12  
C10orf62 Cluster12  
TSSK6 Cluster12  
OAZ3 Cluster12  
GLUL Cluster12  
ACAP1 Cluster12  
GSG1 Cluster12  
TSPAN16 Cluster12  
C16orf82 Cluster12  
FSCN3 Cluster12  
TPPP2 Cluster12  
DNAJC4 Cluster12  
SPEM1 Cluster12  
CRISP2 Cluster12  
SH3RF2 Cluster12  
NUPR2 Cluster12  
C17orf74 Cluster12  
C3orf22 Cluster12  
REEP6 Cluster12  
UBL4B Cluster12  
MORN3 Cluster12  
CCNY Cluster12  
SMCP Cluster12  
RP11-322N21.2 Cluster12  
BPIFA3 Cluster12  
CLPB Cluster12  
NDUFA13 Cluster12  
SPATA42 Cluster12  
PHOSPHO1 Cluster12  
CTD-2568A17.1 Cluster12  
RANGAP1 Cluster12

PROCA1 Cluster12  
CCDC91 Cluster12  
PCP2 Cluster12  
CXCL16 Cluster12  
GAPDHS Cluster12  
PTP4A1 Cluster12  
C19orf70 Cluster12  
GPX4 Cluster12  
LEMD1 Cluster12  
PAQR7 Cluster12  
SPATA18 Cluster12  
LINC00608 Cluster12  
DGCR6L Cluster12  
LPIN1 Cluster12  
RNF138 Cluster12  
CARHSP1 Cluster12  
CCDC37-AS1 Cluster12  
SPTY2D1-AS1 Cluster12  
TCP11 Cluster12  
ODF3L2 Cluster12  
ISG20L2 Cluster12  
SMKR1 Cluster12  
ODF2 Cluster12  
C2orf57 Cluster12  
PCYT2 Cluster12  
LRTOMT Cluster12  
C5orf52 Cluster12  
CDIPT-AS1 Cluster12  
DNAJB8 Cluster12  
METAP1 Cluster12  
C9orf173 Cluster12  
STARD10 Cluster12  
MOSPD3 Cluster12  
MFAP3L Cluster12  
PHKG2 Cluster12  
ZFAND3 Cluster12  
MYL6B Cluster12  
GABRG3-AS1 Cluster12  
HIP1 Cluster12  
TEX38 Cluster12  
PSMF1 Cluster12  
TMC05A Cluster12  
AKAP1 Cluster12  
BZW1 Cluster12  
BOD1L2 Cluster12  
PKM Cluster12  
NDUFA3 Cluster12  
C12orf54 Cluster12  
RP11-402G3.5 Cluster12  
ERI3 Cluster12  
CCDC57 Cluster12  
ACTL7A Cluster12  
CAPZB Cluster12  
C16orf78 Cluster12  
RP11-496I9.1 Cluster12  
KIF2C Cluster12



TMEM31 Cluster12  
RP11-73G16.3 Cluster12  
UBXN6 Cluster12  
ABHD1 Cluster12  
AK1 Cluster12  
RP11-195F19.5 Cluster12  
TSPAN1 Cluster12  
IQCF3 Cluster12  
MRPS25 Cluster12  
ALKBH7 Cluster12  
TMEM53 Cluster12  
ACSBG2 Cluster12  
FAM46C Cluster12  
CABS1 Cluster12  
CEP170 Cluster12  
CIB1 Cluster12  
AQP5 Cluster12  
Clorf234 Cluster12  
FAM71F2 Cluster12  
EIF4H Cluster12  
ALDOA Cluster12  
PDXK Cluster12  
LASP1 Cluster12  
C11orf71 Cluster12  
C20orf141 Cluster12  
MAP1LC3A Cluster12  
RCC1 Cluster12  
AKAP4 Cluster12  
RP11-217B7.3 Cluster12  
FUNDC2 Cluster12  
LINC01191 Cluster12  
THEG Cluster12  
TSSK3 Cluster12  
FBXW5 Cluster12  
NBR1 Cluster12  
ZNF649-AS1 Cluster12  
NDUFA9 Cluster12  
LINC00347 Cluster12  
ACTRT2 Cluster12  
VRK3 Cluster12  
STX8 Cluster12  
RAB11FIP4 Cluster12  
ETNK2 Cluster12  
AZIN2 Cluster12  
TSPAN6 Cluster12  
CCSER2 Cluster12  
PRM3 Cluster12  
ADIG Cluster12  
SLFNL1 Cluster12  
ARPP19 Cluster12  
DUSP15 Cluster12  
SHARPIN Cluster12  
SLC39A13 Cluster12  
MS4A14 Cluster12  
PRKCZ Cluster12  
PRH1 Cluster12

C9orf16 Cluster12  
RP11-304L19.4 Cluster12  
TRIM36 Cluster12  
CCDC70 Cluster12  
AC012594.1 Cluster12  
PGAM2 Cluster12  
OSER1 Cluster12  
PSORS1C1 Cluster12  
C11orf42 Cluster12  
TMEM120A Cluster12  
RP5-956O18.2 Cluster12  
FAM187B Cluster12  
UBQLN3 Cluster12  
LPP Cluster12  
PAFAH1B1 Cluster12  
SEC14L1 Cluster12  
FNDC8 Cluster12  
RP11-109E10.1 Cluster12  
HAGLR Cluster12  
ARL4A Cluster12  
AC009487.4 Cluster12  
TMEM210 Cluster12  
ARHGAP35 Cluster12  
STK35 Cluster12  
C9orf24 Cluster12  
GUCA1A Cluster12  
LINC00851 Cluster12  
AC010649.1 Cluster12  
SPATA6 Cluster12  
KCNIP2-AS1 Cluster12  
RNF38 Cluster12  
PGK2 Cluster12  
SGCA Cluster12  
NRDC Cluster12  
RP11-146F11.1 Cluster12  
RAD23B Cluster12  
DPP7 Cluster12  
AKAP14 Cluster12  
NTRK3-AS1 Cluster12  
MACROD2-AS1 Cluster12  
NSUN4 Cluster12  
GSTM3 Cluster12  
RND2 Cluster12  
HBZ Cluster12  
CABYR Cluster12  
ST6GALNAC2 Cluster12  
PLBD2 Cluster12  
MAP2K2 Cluster12  
PHACTR2-AS1 Cluster12  
C10orf53 Cluster12  
SLC38A7 Cluster12  
HABP4 Cluster12  
ODF3B Cluster12  
WBP2NL Cluster12  
AC002115.5 Cluster12  
UBQLNL Cluster12

LRRD1 Cluster12  
BRWD1-AS2 Cluster12  
YJEFN3 Cluster12  
MAD2L2 Cluster12  
OPTN Cluster12  
AC007325.4 Cluster12  
MSTO1 Cluster12  
TSSK2 Cluster12  
FAM229B Cluster12  
TREH Cluster12  
ELOF1 Cluster12  
DYRK1B Cluster12  
CUL9 Cluster12  
ZDHHC19 Cluster12  
RGS22 Cluster12  
LINC00521 Cluster12  
LSMEM2 Cluster12  
ZNF571-AS1 Cluster12  
CCDC136 Cluster12  
TP53I11 Cluster12  
TTL10 Cluster12  
SPATC1 Cluster12  
SORBS3 Cluster12  
PSMA6 Cluster12  
OGFOD2 Cluster12  
SH3GL3 Cluster12  
KLHDC3 Cluster12  
PGP Cluster12  
PPP1R11 Cluster12  
PHF2 Cluster12  
ATXN1L Cluster12  
RAB1F Cluster12  
TSACC Cluster12  
EIF4E Cluster12  
NDUFS8 Cluster12  
WI2-2373I1.2 Cluster12  
NDUFV3 Cluster12  
NUP35 Cluster12  
FAM120B Cluster12  
RP11-400L8.2 Cluster12  
ACE Cluster12  
RNF44 Cluster12  
SPATA12 Cluster12  
CCDC187 Cluster12  
BCL2L14 Cluster12  
NELFE Cluster12  
PRPH Cluster12  
SMG9 Cluster12  
RP11-162N7.1 Cluster12  
PARD6A Cluster12  
PIK3R3.1 Cluster12  
LINC00535 Cluster12  
HK1 Cluster12  
ACPT Cluster12  
TPI1 Cluster12  
BCAS3 Cluster12

PHF7 Cluster12  
DNAJC5B Cluster12  
CT83 Cluster12  
METTL22 Cluster12  
MROH7 Cluster12  
DGCR14 Cluster12  
RANGRF Cluster12  
MEX3D Cluster12  
INPP5K Cluster12  
SLC27A5 Cluster12  
SPATA20 Cluster12  
GPI Cluster12  
NEURL1 Cluster12  
ZNF688 Cluster12  
CTB-35F21.2 Cluster12  
ANKRD53 Cluster12  
RP11-1277A3.1 Cluster12  
CLCNKA Cluster12  
RP11-364B14.1 Cluster12  
PAOX Cluster12  
LINC00445 Cluster12  
TNFAIP8L1 Cluster12  
RP11-520D19.1 Cluster12  
C16orf13 Cluster12  
CDHR2 Cluster12  
TSSK1B Cluster12  
PPP2R5A Cluster12  
GNAS Cluster12  
H1FNT Cluster12  
BANF2 Cluster12  
IGSF11-AS1 Cluster12  
OSGIN1 Cluster12  
SAMD4A Cluster12  
SLC22A18 Cluster12  
ZMIZ1 Cluster12  
FAM195A Cluster12  
C1orf194 Cluster12  
ASB5 Cluster12  
ETV2 Cluster12  
ZNF124 Cluster12  
RP11-345J4.3 Cluster12  
MAP3K14-AS1 Cluster12  
CRAT Cluster12  
DUSP18 Cluster12  
SENP8 Cluster12  
GSTZ1 Cluster12  
DKFZP434K028 Cluster12  
CARS2 Cluster12  
ZNF706 Cluster12  
DNAJC18 Cluster12  
PWRN1 Cluster12  
AC004070.1 Cluster12  
TESC Cluster12  
PDE4A Cluster12  
MAPT-AS1 Cluster12  
RP11-347C12.3 Cluster12

ANO2 Cluster12  
AC092155.4 Cluster12  
LYPD4 Cluster12  
RP11-30L15.6 Cluster12  
LINC00901 Cluster12  
GPX1 Cluster12  
DDX3X Cluster12  
RP11-12601.2 Cluster12  
HYPM Cluster12  
COL9A3 Cluster12  
DUSP21 Cluster12  
UBA5 Cluster12  
FLJ36000 Cluster12  
SNX29 Cluster12  
10-Mar Cluster12  
C16orf72 Cluster12  
ZDHHC3 Cluster12  
DHX57 Cluster12  
AVPI1 Cluster12  
TTLL6 Cluster12  
BMP7-AS1 Cluster12  
KLK13 Cluster12  
SLC25A28 Cluster12  
CYSTM1 Cluster12  
CYP17A1-AS1 Cluster12  
CCDC169 Cluster12  
USPL1 Cluster12  
TBX1 Cluster12  
NRAV Cluster12  
PDZD8 Cluster12  
GLRX2 Cluster12  
RP11-100N20.1 Cluster12  
FRMD6 Cluster12  
TEX26 Cluster12  
SYN3 Cluster12  
RP11-763K15.1 Cluster12  
C17orf50 Cluster12  
QARS Cluster12  
THBS3 Cluster12  
CIB2 Cluster12  
MRPS15 Cluster12  
STPG1 Cluster12  
AZIN1-AS1 Cluster12  
CSNK1D Cluster12  
SLC22A23 Cluster12  
PCSK4 Cluster12  
VWA3B Cluster12  
RP11-14J7.7 Cluster12  
LYPD6 Cluster12  
FNDC4 Cluster12  
C17orf97 Cluster12  
RP4-712E4.1 Cluster12  
SPZ1 Cluster12  
CYB5R2 Cluster12  
MAD1L1 Cluster12  
DDI1 Cluster12

TBATA Cluster12  
EPHA10 Cluster12  
RP11-536N17.1 Cluster12  
CTD-307407.5 Cluster12  
RP11-191N8.2 Cluster12  
RP11-93209.4 Cluster12  
BACE1 Cluster12  
EGLN2 Cluster12  
C9orf50 Cluster12  
RFTN2 Cluster12  
HYAL3 Cluster12  
AC004623.2 Cluster12  
PPP2R2B Cluster12  
SERPINA5 Cluster12  
SPATC1L Cluster12  
RP11-46021.2 Cluster12  
RP11-783K16.5 Cluster12  
RP11-156L14.1 Cluster12  
SMPD1 Cluster12  
CBLN1 Cluster12  
FSCB Cluster12  
RP11-319G6.1 Cluster12  
HRASLS5 Cluster12  
TOLLIP Cluster12  
RP11-168016.2 Cluster12  
ITPKA Cluster12  
CCDC188 Cluster12  
SAG Cluster12  
EHD1 Cluster12  
CDNF Cluster12  
CFAP100 Cluster12  
NAT6 Cluster12  
CSMD2-AS1 Cluster12  
LINC00635 Cluster12  
LINC00943 Cluster12  
NT5C1B Cluster12  
ZNF350-AS1 Cluster12  
C17orf107 Cluster12  
TMEM91 Cluster12  
MGC39584 Cluster12  
CTD-2330K9.3 Cluster12  
AC007557.4 Cluster12  
CTD-2530N21.4 Cluster12  
LSM14B Cluster12  
RP11-834C11.4 Cluster12  
RP11-286M16.1 Cluster12  
LCP1 Cluster12  
GNG3 Cluster12  
RP11-770E5.3 Cluster12  
TBC1D21 Cluster12  
HDAC11 Cluster12  
RP11-109P11.1 Cluster12  
TH2LCRR Cluster12  
B4GALT1-AS1 Cluster12  
GDPD3 Cluster12  
CSNK1G2 Cluster12

RP11-805I24.1 Cluster12  
BRI3BP Cluster12  
TMEM215 Cluster12  
RP11-630C16.1 Cluster12  
RP11-106M3.3 Cluster12  
RP11-90C4.1 Cluster12  
C19orf45 Cluster12  
RP1-93H18.1 Cluster12  
KIAA0513 Cluster12  
RP11-1338A24.1 Cluster12  
RP11-493E12.1 Cluster12  
ODF1 Cluster12  
USP2 Cluster12  
C6orf132 Cluster12  
TSGA13 Cluster12  
GABRG3 Cluster12  
SRPK2 Cluster12  
MIR9-3HG Cluster12  
OSBPL10 Cluster12  
EXOSC4 Cluster12  
TMEM239 Cluster12  
RP11-214D15.2 Cluster12  
CERS1 Cluster12  
ZNHIT2 Cluster12  
SLC25A46 Cluster12  
BMP8A Cluster12  
RP11-588G21.2 Cluster12  
HSPA4L Cluster12  
RIBC1 Cluster12  
C4orf36 Cluster12  
RP11-219E7.2 Cluster12  
ZCCHC13 Cluster12  
RP1-4G17.2 Cluster12  
AC012370.3 Cluster12  
PPP1R36 Cluster12  
RP11-363E6.3 Cluster12  
RP11-61J19.2 Cluster12  
FBXL13 Cluster12  
TAF10 Cluster12  
TIMP2 Cluster12  
OSBP2 Cluster12  
TTC16 Cluster12  
CTD-2520I13.1 Cluster12  
HSPB9 Cluster12  
ESPN Cluster12  
RP11-402G3.3 Cluster12  
RP11-881M11.1 Cluster12  
SELO Cluster12  
RP11-1078H9.5 Cluster12  
TRIM29 Cluster12  
SSR4 Cluster12  
MYL6 Cluster12  
PRC1-AS1 Cluster12  
DGCR6 Cluster12  
KLK5 Cluster12  
CSE1L-AS1 Cluster12

RP11-415J8.5 Cluster12  
C11orf1 Cluster12  
RP11-370P15.2 Cluster12  
RP1-92O14.6 Cluster12  
NACC2 Cluster12  
TMX4 Cluster12  
CTD-2231E14.4 Cluster12  
KIAA0895L Cluster12  
RP11-624L4.2 Cluster12  
PRR30 Cluster12  
CHRNE Cluster12  
FAM20A Cluster12  
MOGS Cluster12  
MTX1 Cluster12  
PMFBP1 Cluster12  
MAPK13 Cluster12  
DHRS3 Cluster12  
SELV Cluster12  
LINC00326 Cluster12  
C16orf90 Cluster12  
SLC10A6 Cluster12  
LPIN3 Cluster12  
LRRC27 Cluster12  
TPD52L3 Cluster12  
PRR7-AS1 Cluster12  
APOE Cluster12  
FAM217A Cluster12  
CCDC7 Cluster12  
MFF Cluster12  
LINGO1-AS2 Cluster12  
C7orf31 Cluster12  
KLK11 Cluster12  
LYL1 Cluster12  
CEP85L Cluster12  
C12orf50 Cluster12  
C2orf70 Cluster12  
RP11-147C23.1 Cluster12  
CLU Cluster12  
LRRC71 Cluster12  
CYLC1 Cluster12  
EEF1D Cluster12  
SPPL2C Cluster12  
HSPA1L Cluster12  
MAPK10 Cluster12  
CD37 Cluster12  
AMZ2 Cluster12  
LINC01227 Cluster12  
ZFAND4 Cluster12  
KLHL10 Cluster12  
LINC00202-1 Cluster12  
RP11-705O24.1 Cluster12  
RP11-7M8.2 Cluster12  
PPP1R32 Cluster12  
CDKN2A Cluster12  
LOXHD1 Cluster12  
CAMLG Cluster12



C6orf201 Cluster12  
GALNTL5 Cluster12  
TEX40 Cluster12  
LINC00301 Cluster12  
MORN2 Cluster12  
BRK1 Cluster12  
GHITM Cluster12  
ARL2 Cluster12  
ATL3 Cluster12  
CNTFR-AS1 Cluster12  
HMOX2 Cluster12  
AC006946.15 Cluster12  
MCM8-AS1 Cluster12  
UQCC2 Cluster12  
GFRA2 Cluster12  
TCTE1 Cluster12  
TMEM191C Cluster12  
ICA1 Cluster12  
IZUMO4 Cluster12  
GGN Cluster12  
S1PR2 Cluster12  
NGLY1 Cluster12  
LINC00658 Cluster12  
FXR1 Cluster12  
FAM220A Cluster12  
TEX22 Cluster12  
LURAP1 Cluster12  
RP11-496H1.2 Cluster12  
MRPL41 Cluster12  
RAB8B Cluster12  
RP11-38F22.1 Cluster12  
MZT2B Cluster12  
PTOV1 Cluster12  
ADRM1 Cluster12  
MPLKIP cluster2  
CST3 cluster2  
RPLP1 cluster2  
HIST1H1A cluster2  
MAGEA4 cluster2  
PFN1 cluster2  
RBM3 cluster2  
LSM7 cluster2  
RAMP2 cluster2  
PNMA5 cluster2  
PRDX1 cluster2  
SLC35B2 cluster2  
C1QBP cluster2  
RDX cluster2  
TNIP2 cluster2  
EGFL7 cluster2  
ZNF559 cluster2  
C14orf2 cluster2  
RASGRP2 cluster2  
TSR2 cluster2  
BSG cluster2  
PARP1 cluster2

GTF2E2 cluster2  
MPP5 cluster2  
RBFA cluster2  
CTSA cluster2  
HSD17B10 cluster2  
CT45A10 cluster2  
GAGE1 cluster2  
MTHFD2 cluster2  
STARD7 cluster2  
YY2 cluster2  
CCDC167 cluster2  
UXT cluster2  
CTSD cluster2  
PRAME cluster2  
CETN2 cluster2  
ATP5G2 cluster2  
PIM1 cluster2  
NAMPT cluster2  
NAA50 cluster2  
TSFM cluster2  
OS9 cluster2  
NOP56 cluster2  
H2AFY cluster2  
TMEM14B cluster2  
BRD9 cluster2  
PDLIM5 cluster2  
DTYMK cluster2  
STEAP1 cluster2  
MCM6 cluster2  
UBE2E3 cluster2  
NAPG cluster2  
LAMC1 cluster2  
ADSL cluster2  
IQGAP1 cluster2  
CAMSAP1 cluster2  
PIK3IP1 cluster2  
GLMN cluster2  
HTATSF1 cluster2  
SFSWAP cluster2  
NPAT cluster2  
FAM96A cluster2  
RNF2 cluster2  
CENPM cluster2  
HECTD1 cluster2  
WHAMM cluster2  
MFAP1 cluster2  
GUCD1 cluster2  
EIF4EBP2 cluster2  
ERVK3-1 cluster2  
C19orf43 cluster2  
GRB2 cluster2  
POP5 cluster2  
TRIAP1 cluster2  
AGA cluster2  
HIST1H1C cluster2  
PCNT cluster2

COPS7B cluster2  
NPC1 cluster2  
VPS25 cluster2  
CHD3 cluster2  
MCM3 cluster2  
HDHD2 cluster2  
FNBP1 cluster2  
GANAB cluster2  
POLE4 cluster2  
MAPKAPK5 cluster2  
TPM1 cluster2  
MPHOSPH6 cluster2  
BAX cluster2  
SLC25A14 cluster2  
NUP85 cluster2  
KMT5B cluster2  
CDK10 cluster2  
TFDP3 cluster2  
ERAL1 cluster2  
EIF2AK1 cluster2  
FXVD1 cluster2  
SLC3A2 cluster2  
RBM22 cluster2  
PLD3 cluster2  
CAPZA2 cluster2  
ATG5 cluster2  
C8orf33 cluster2  
PARL cluster2  
PPAT cluster2  
TULP3 cluster2  
PPIB cluster2  
CHRNA5 cluster2  
OGG1 cluster2  
PAFAH1B2 cluster2  
TWISTNB cluster2  
NPM3 cluster2  
NIPA2 cluster2  
TUBGCP3 cluster2  
MOCS2 cluster2  
LRRC47 cluster2  
AKAP10 cluster2  
MECP2 cluster2  
TMEM145 cluster2  
UROD cluster2  
CNTFR cluster2  
CSTB cluster2  
PRPF19 cluster2  
NDUFB7 cluster2  
FOXR1 cluster2  
MRPS6 cluster2  
NOC2L cluster2  
CTU2 cluster2  
ATRX cluster2  
PGAM1 cluster2  
KIAA0355 cluster2  
RSBN1L cluster2

FDX1 cluster2  
SMUG1 cluster2  
MOB2 cluster2  
PSMD13 cluster2  
ANKRD17 cluster2  
WDHD1 cluster2  
JTB cluster2  
TRAF2 cluster2  
RAP1B cluster2  
NUDT3 cluster2  
ABHD14A cluster2  
GGA2 cluster2  
ARHGAP21 cluster2  
SNRNP25 cluster2  
RBM4B cluster2  
PCYOX1 cluster2  
TMX3 cluster2  
CDCA7 cluster2  
SESTD1 cluster2  
CENPA cluster2  
RBMX cluster2  
CHCHD10 cluster2  
SARNP cluster2  
UBAP2 cluster2  
NELFCD cluster2  
GJC1 cluster2  
NKIRAS2 cluster2  
KANSL1-AS1 cluster2  
HAUS8 cluster2  
NXT2 cluster2  
ZBTB11 cluster2  
GNPTG cluster2  
REXO4 cluster2  
CPVL cluster2  
COQ4 cluster2  
ARHGAP12 cluster2  
TMEM126B cluster2  
MEF2A cluster2  
TCOF1 cluster2  
C9orf142 cluster2  
RNASEH2C cluster2  
LRRC40 cluster2  
SPOP cluster2  
FUBP1 cluster2  
CTAG2 cluster2  
POLR2A cluster2  
CHCHD4 cluster2  
HEATR1 cluster2  
MRPS23 cluster2  
CUL5 cluster2  
MRPL44 cluster2  
CRK cluster2  
VMA21 cluster2  
TSEN34 cluster2  
MTRNR2L12 cluster2  
COX5B cluster2

C9orf72 cluster2  
MTMR12 cluster2  
PPP2CB cluster2  
PDPK1 cluster2  
SPPL3 cluster2  
TMEM245 cluster2  
MRPL50 cluster2  
RNF4 cluster2  
TYW3 cluster2  
LDHB cluster2  
CD63 cluster2  
RPL36A cluster2  
MDM2 cluster2  
HSPA1A cluster2  
EED cluster2  
RERE cluster2  
RPS3 cluster2  
PURA cluster2  
PRKAG1 cluster2  
MRPL48 cluster2  
SNHG7 cluster2  
EP300 cluster2  
BORCS8 cluster2  
CENPC cluster2  
ANXA7 cluster2  
PI4KB cluster2  
TMEM199 cluster2  
MBD4 cluster2  
SGPL1 cluster2  
PRDX5 cluster2  
APLP1 cluster2  
LIMS1 cluster2  
PSMD12 cluster2  
MAGOHB cluster2  
COA3 cluster2  
ZMYND19 cluster2  
IFT46 cluster2  
FAM136A cluster2  
ANAPC13 cluster2  
THUMP1 cluster2  
NOLC1 cluster2  
E2F1 cluster2  
CPSF2 cluster2  
B2M cluster2  
C7orf50 cluster2  
UBA3 cluster2  
SDF2 cluster2  
WDR12 cluster2  
RRAS2 cluster2  
LCOR cluster2  
HTT cluster2  
LSG1 cluster2  
HCFC1 cluster2  
URM1 cluster2  
CD2BP2 cluster2  
CCZ1 cluster2

LTBP3 cluster2  
TAF3 cluster2  
SLF2 cluster2  
EIF3I cluster2  
RP9 cluster2  
ACAP2 cluster2  
SPG21 cluster2  
MAP4K4 cluster2  
ZNF711 cluster2  
LRP6 cluster2  
UBE2E2 cluster2  
PFDN1 cluster2  
DCPS cluster2  
USP34 cluster2  
TRNAU1AP cluster2  
PACSIN2 cluster2  
NR6A1 cluster2  
PPP2R4 cluster2  
FUNDC1 cluster2  
CALU cluster2  
APP cluster2  
SMARCC1 cluster2  
MPDU1 cluster2  
SEC13 cluster2  
JAM3 cluster2  
CCAR2 cluster2  
MORC4 cluster2  
C16orf91 cluster2  
PET117 cluster2  
AAK1 cluster2  
SSR1 cluster2  
PASD1 cluster2  
POLD1 cluster2  
NAT10 cluster2  
PPP3CA cluster2  
LINC00969 cluster2  
TCTN3 cluster2  
ZFX cluster2  
PHF10 cluster2  
PPIL1 cluster2  
PSMB4 cluster2  
RNF13 cluster2  
CDS2 cluster2  
ABT1 cluster2  
PMF1 cluster2  
MAN1B1 cluster2  
UMPS cluster2  
PEX19 cluster2  
ANKS3 cluster2  
PPP1R8 cluster2  
MRPL27 cluster2  
SMARCAD1 cluster2  
ICMT cluster2  
NFRKB cluster2  
ZNF644 cluster2  
APEH cluster2

PSAP cluster2  
TUBGCP5 cluster2  
LETMD1 cluster2  
PIN4 cluster2  
VPS33A cluster2  
ADPGK cluster2  
ARHGAP11A cluster2  
MACROD1 cluster2  
GNAI1 cluster2  
ARF3 cluster2  
MRPL24 cluster2  
PER3 cluster2  
U2AF2 cluster2  
UBE2I cluster2  
SMARCE1 cluster2  
TMEM141 cluster2  
COPZ1 cluster2  
SCO1 cluster2  
SIKE1 cluster2  
GATAD2A cluster2  
ACTB cluster2  
C4orf27 cluster2  
NCOA1 cluster2  
HBQ1 cluster2  
RPS6KA5 cluster2  
MRPL1 cluster2  
YWHAH cluster2  
GOLGA5 cluster2  
PSMG4 cluster2  
PAK1IP1 cluster2  
DLEU1 cluster2  
HYAL2 cluster2  
PPP1R37 cluster2  
SLC37A4 cluster2  
ASPM cluster2  
XPNPEP1 cluster2  
UBE2Z cluster2  
LRRC58 cluster2  
PREB cluster2  
NUP58 cluster2  
PUS7L cluster2  
NDUFB8 cluster2  
BORCS7 cluster2  
SRSF6 cluster2  
ATG4B cluster2  
MAP3K7 cluster2  
SKA3 cluster2  
NEO1 cluster2  
TOMM22 cluster2  
PRPSAP2 cluster2  
RWDD4 cluster2  
FUT8 cluster2  
MTRNR2L8 cluster2  
NENF cluster2  
MT-ND6 cluster2  
R3HDM2 cluster2

LRRC14 cluster2  
EMG1 cluster2  
NOM1 cluster2  
MZT2A cluster2  
GARS cluster2  
B3GAT2 cluster2  
ATOX1 cluster2  
WDR45B cluster2  
VTA1 cluster2  
F12 cluster2  
ZNF593 cluster2  
TTC5 cluster2  
ZNF236 cluster2  
PMPCA cluster2  
VPS4A cluster2  
SFI1 cluster2  
MIA3 cluster2  
FBXO18 cluster2  
WDR47 cluster2  
PITPNA cluster2  
SPIDR cluster2  
FAM3C cluster2  
TSR1 cluster2  
PRKCSH cluster2  
DUSP11 cluster2  
GXYLT1 cluster2  
ORC5 cluster2  
PLEKHA5 cluster2  
SRFBP1 cluster2  
C9orf78 cluster2  
MKLN1 cluster2  
ARFIP1 cluster2  
PIK3R3 cluster2  
DYNLRB1 cluster2  
USP31 cluster2  
TRAPPC1 cluster2  
PPIE cluster2  
PRKRIR cluster2  
ZFAND2A cluster2  
CENPQ cluster2  
ERICH1 cluster2  
NBEAL1 cluster2  
CMPK1 cluster2  
STIM2 cluster2  
PRDM2 cluster2  
RNASEH2A cluster2  
TMEM9 cluster2  
MTMR3 cluster2  
CKAP2L cluster2  
XPC cluster2  
WASF2 cluster2  
TMPO cluster2  
SMIM7 cluster2  
CCDC137 cluster2  
UBE2Q1 cluster2  
FAM103A1 cluster2



NT5C cluster2  
CLN5 cluster2  
ICE2 cluster2  
EFTUD2 cluster2  
C19orf48 cluster2  
CTSH cluster2  
FBXW2 cluster2  
EVI5 cluster2  
LSM4 cluster2  
EPN1 cluster2  
NIFK cluster2  
SNRPN cluster2  
CCS cluster2  
INPP5F cluster2  
PTPN2 cluster2  
EIF3B cluster2  
FTSJ2 cluster2  
HINT2 cluster2  
LRPPRC cluster2  
FAM50B cluster2  
SQSTM1 cluster2  
TFDP1 cluster2  
MORC1 cluster2  
USP14 cluster2  
MRPL32 cluster2  
MCM7 cluster2  
STRA13 cluster2  
UNG cluster2  
NFYC cluster2  
DNAJC9 cluster2  
IARS2 cluster2  
UCHL1 cluster2  
HSPA1B cluster2  
SREK1 cluster2  
IWS1 cluster2  
TMED4 cluster2  
FKBP3 cluster2  
DCAF4L2 cluster2  
PELP1 cluster2  
GTF2F2 cluster2  
UBTF cluster2  
ENDOV cluster2  
ZFYVE21 cluster2  
CSNK1G3 cluster2  
ASAP1 cluster2  
FIS1 cluster2  
CFL1 cluster2  
CALM1 cluster2  
UBE2C cluster2  
C20orf27 cluster2  
RPS2 cluster2  
APRT cluster2  
DMRT1 cluster2  
RPS28 cluster2  
PAFAH1B3 cluster2  
ACTG1 cluster2

ESX1 cluster2  
SAP25 cluster2  
COX20 cluster2  
EI24 cluster2  
NOP10 cluster2  
RPS8 cluster2  
NME1 cluster2  
HMGA1 cluster2  
TXN cluster2  
GCSH cluster2  
RPSA cluster2  
TUBA1C cluster2  
C4orf48 cluster2  
TMA7 cluster2  
TIMM13 cluster2  
RPL18A cluster2  
TMSB10 cluster2  
MYL12A cluster2  
RPL10A cluster2  
PTS cluster2  
TLE1 cluster2  
CYC1 cluster2  
GNL3 cluster2  
ACTL8 cluster2  
ATP5I cluster2  
RPS19BP1 cluster2  
ACRC cluster2  
ASAH1 cluster2  
OAZ1 cluster2  
SRM cluster2  
RPL10 cluster2  
PLEKHJ1 cluster2  
SOHLH1 cluster2  
ISOC1 cluster2  
NMT2 cluster2  
SIGIRR cluster2  
HMBS cluster2  
COMMD6 cluster2  
QDPR cluster2  
SPATS2L cluster2  
CTBP2 cluster2  
NMRAL1 cluster2  
PGK1 cluster2  
SLC25A5 cluster2  
CECR5 cluster2  
WDR34 cluster2  
PPP1CA cluster2  
DCTPP1 cluster2  
POLE3 cluster2  
CD3EAP cluster2  
TBL1XR1 cluster2  
CD9 cluster2  
APOA1BP cluster2  
DNPH1 cluster2  
EXOSC5 cluster2  
AP1S1 cluster2

IMPDH2 cluster2  
CCND1 cluster2  
CHD6 cluster2  
RPL6 cluster2  
MRPL15 cluster2  
EDF1 cluster2  
CD99 cluster2  
POP7 cluster2  
PDCD2 cluster2  
DRAP1 cluster2  
AGTRAP cluster2  
MCM5 cluster2  
MRPS34 cluster2  
PPP1R14A cluster2  
NHP2 cluster2  
KRTCAP3 cluster2  
CDT1 cluster2  
ENOPH1 cluster2  
B4GALT3 cluster2  
KCTD20 cluster2  
LAMTOR4 cluster2  
C16orf59 cluster2  
TTF1 cluster2  
MLX cluster2  
ARHGEF26 cluster2  
E2F6 cluster2  
POLR3K cluster2  
MKI67 cluster2  
TMEM256 cluster2  
FEZ2 cluster2  
RCAN3 cluster2  
ARMC10 cluster2  
ALKBH2 cluster2  
SLC39A4 cluster2  
TFB2M cluster2  
ASNA1 cluster2  
POLR1C cluster2  
COPS7A cluster2  
DPH2 cluster2  
KLHL15 cluster2  
NEFH cluster2  
TSEN54 cluster2  
USO1 cluster2  
SYNC cluster2  
KIT cluster2  
SORL1 cluster2  
SNAPIN cluster2  
TSEN2 cluster2  
AP3S1 cluster2  
FXN cluster2  
DCAF4 cluster2  
RPL27A cluster2  
GRSF1 cluster2  
FARSA cluster2  
DLL3 cluster2  
STIP1 cluster2

AFMID cluster2  
CLPTM1L cluster2  
CCDC107 cluster2  
RPIA cluster2  
GPATCH4 cluster2  
CLOCK cluster2  
ANP32E cluster2  
GPC4 cluster2  
FAM213A cluster2  
STUB1 cluster2  
HOXB4 cluster2  
IMP3 cluster2  
YIF1A cluster2  
COPE cluster2  
YRDC cluster2  
NARS cluster2  
CISD3 cluster2  
UQCC3 cluster2  
MCM2 cluster2  
COX4I1 cluster2  
SAMD1 cluster2  
SDAD1 cluster2  
ATG14 cluster2  
FGFR1OP2 cluster2  
NUDT16L1 cluster2  
ARHGDI1A cluster2  
ZNF296 cluster2  
PARP2 cluster2  
ABCF1 cluster2  
PSMG3 cluster2  
PTPRF cluster2  
PNO1 cluster2  
GCAT cluster2  
ADH5 cluster2  
TXLNG cluster2  
NUCKS1 cluster2  
SLC25A11 cluster2  
MIER1 cluster2  
PLIN2 cluster2  
ENOSF1 cluster2  
FPGS cluster2  
QTRTD1 cluster2  
TRAPPC6A cluster2  
HACD2 cluster2  
SSBP4 cluster2  
DVL2 cluster2  
MRTO4 cluster2  
RAB22A cluster2  
NT5DC2 cluster2  
SS18L2 cluster2  
PHB cluster2  
PIM3 cluster2  
ADPRHL2 cluster2  
RILP cluster2  
ASF1A cluster2  
TSNAX cluster2

HOMER2 cluster2  
MBTPS1 cluster2  
NDUFA1 cluster2  
LARP1 cluster2  
MYBBP1A cluster2  
POLE2 cluster2  
CDK2AP2 cluster2  
POLR3G cluster2  
IDH1 cluster2  
NOP16 cluster2  
NR2C2AP cluster2  
TAF9B cluster2  
QTRT1 cluster2  
SURF1 cluster2  
TMEM106C cluster2  
PEPD cluster2  
MAPK6 cluster2  
PPAN cluster2  
C1GALT1 cluster2  
MSH6 cluster2  
THOC6 cluster2  
GOLT1B cluster2  
BPHL cluster2  
LAPTM4B cluster2  
NBN cluster2  
TAF1D cluster2  
UQCR11 cluster2  
TGOLN2 cluster2  
FAM219B cluster2  
UBE2E1 cluster2  
RRS1 cluster2  
MYO1B cluster2  
Clorf131 cluster2  
GRWD1 cluster2  
CCNA2 cluster2  
WDR77 cluster2  
BRD3 cluster2  
KCTD5 cluster2  
NOB1 cluster2  
G3BP1 cluster2  
MAEA cluster2  
POLR2G cluster2  
LYRM4 cluster2  
TBC1D7 cluster2  
MRPL4 cluster2  
ATXN3 cluster2  
NDUFB11 cluster2  
AIFM1 cluster2  
CCDC85B cluster2  
ECI1 cluster2  
PIGX cluster2  
FOXRED2 cluster2  
NDUFB9 cluster2  
THAP11 cluster2  
PTBP1 cluster2  
CPNE7 cluster2

SMARCD1 cluster2  
APC cluster2  
DCXR cluster2  
GTF3C5 cluster2  
TRAF3IP1 cluster2  
DNAAF5 cluster2  
RP11-366H4.1 cluster2  
COX19 cluster2  
MRPL12 cluster2  
MANBAL cluster2  
PRKD2 cluster2  
NDUFA11 cluster2  
GIGYF1 cluster2  
DUSP22 cluster2  
PARP16 cluster2  
SLC20A1 cluster2  
SNX10 cluster2  
POLR3H cluster2  
UBE2O cluster2  
EIF2S3 cluster2  
TRAPPC4 cluster2  
FDX1L cluster2  
AEBP2 cluster2  
DARS cluster2  
RP4-594I10.3 cluster2  
ULK3 cluster2  
DHPS cluster2  
SRPRA cluster2  
SRD5A3 cluster2  
FAM32A cluster2  
CTTN cluster2  
GNPTAB cluster2  
HES4 cluster2  
WIPF2 cluster2  
UHRF1 cluster2  
FBLN2 cluster2  
NCOA7 cluster2  
NAA10 cluster2  
ARFGAP2 cluster2  
SNX11 cluster2  
COQ10A cluster2  
NUS1 cluster2  
BCL2L12 cluster2  
C19orf25 cluster2  
RRP9 cluster2  
MORF4L2 cluster2  
CTPS1 cluster2  
ARRB2 cluster2  
GAGE13 cluster2  
CHAMP1 cluster2  
MYSM1 cluster2  
THAP9-AS1 cluster2  
MYBL2 cluster2  
ARL6IP6 cluster2  
ZBTB24 cluster2  
C22orf39 cluster2

TMTC4 cluster2  
MPZL1 cluster2  
TMED1 cluster2  
JAG2 cluster2  
G6PD cluster2  
MAP1A cluster2  
CEP68 cluster2  
CASP7 cluster2  
TRAP1 cluster2  
ZCCHC10 cluster2  
PDCD2L cluster2  
BABAM1 cluster2  
RSAD1 cluster2  
XIST cluster2  
SURF6 cluster2  
PAK2 cluster2  
ATG12 cluster2  
ETV7 cluster2  
MRPL49 cluster2  
TIMELESS cluster2  
MAP3K5 cluster2  
TMEM223 cluster2  
SHTN1 cluster2  
ARL6IP4 cluster2  
MRPS18B cluster2  
FAM98A cluster2  
RPE cluster2  
BYSL cluster2  
HIBADH cluster2  
RMND5A cluster2  
RRP12 cluster2  
RRP1 cluster2  
PREPL cluster2  
GSE1 cluster2  
ELK1 cluster2  
SLC52A2 cluster2  
EPB41L5 cluster2  
TSPAN4 cluster2  
OSGEP cluster2  
SPOPL cluster2  
MED6 cluster2  
CNP cluster2  
YIF1B cluster2  
RP11-12G12.7 cluster2  
BIK cluster2  
NELFA cluster2  
MED16 cluster2  
RFXAP cluster2  
ITPA cluster2  
B3GAT3 cluster2  
EMC1 cluster2  
DDX54 cluster2  
SLC25A4 cluster2  
NRDE2 cluster2  
ITM2C cluster2  
MYCBP2 cluster2

CGREF1 cluster2  
SLC35C2 cluster2  
TRAF3 cluster2  
SMARCA4 cluster2  
PNKD cluster2  
WDYHV1 cluster2  
KIAA1551 cluster2  
COQ10B cluster2  
SEPHS1 cluster2  
NARS2 cluster2  
SEMA4D cluster2  
IQCA1 cluster2  
USP3 cluster2  
HRAS cluster2  
SIRT7 cluster2  
BNIP2 cluster2  
TPD52L2 cluster2  
GFM1 cluster2  
RNF5 cluster2  
TK1 cluster2  
CST6 cluster2  
TNKS2 cluster2  
NDFIP1 cluster2  
TSPY2 cluster2  
EPB41L4B cluster2  
MAPRE1 cluster2  
RPUSD4 cluster2  
ATP6V1H cluster2  
BAHCC1 cluster2  
RP11-10A14.5 cluster2  
C6orf1 cluster2  
PRR13 cluster2  
TOR1AIP2 cluster2  
GIPC1 cluster2  
SNHG15 cluster2  
CYB5R3 cluster2  
CKAP4 cluster2  
NAT9 cluster2  
RBPMS2 cluster2  
EIF2AK4 cluster2  
RUFY2 cluster2  
CXADR cluster2  
OXA1L cluster2  
RRAGD cluster2  
COA6 cluster2  
CAD cluster2  
UBE3D cluster2  
PPARG cluster2  
G6PC3 cluster2  
SCRN2 cluster2  
IFI27L2 cluster2  
EGLN1 cluster2  
PUS1 cluster2  
POLR3D cluster2  
TYW1 cluster2  
CNPPD1 cluster2



CCM2 cluster2  
RP11-294J22.6 cluster2  
SNX1 cluster2  
CIAO1 cluster2  
SECISBP2L cluster2  
CDC23 cluster2  
RCC2 cluster2  
FGD6 cluster2  
DUSP14 cluster2  
ACLY cluster2  
MBOAT2 cluster2  
UTP4 cluster2  
ACP2 cluster2  
C17orf89 cluster2  
NIP7 cluster2  
VPS37C cluster2  
MTERF3 cluster2  
C3orf17 cluster2  
MRPS35 cluster2  
TIGAR cluster2  
CCDC115 cluster2  
RAB9A cluster2  
BCAT2 cluster2  
TMEM43 cluster2  
GALK1 cluster2  
MRPS28 cluster2  
TSC2 cluster2  
IMP4 cluster2  
CHMP4B cluster2  
CREG1 cluster2  
TXN2 cluster2  
NOP2 cluster2  
ST3GAL5 cluster2  
APPL2 cluster2  
NRAS cluster2  
DIMT1 cluster2  
KMT2B cluster2  
METTL1 cluster2  
CLUH cluster2  
INTU cluster2  
PRMT2 cluster2  
SLC35B4 cluster2  
KPTN cluster2  
SEPW1 cluster2  
CCNT2 cluster2  
ZNF212 cluster2  
PPRC1 cluster2  
NCBP2-AS2 cluster2  
SOHLH2 cluster2  
TPRA1 cluster2  
PPIF cluster2  
COX16 cluster2  
ALKBH4 cluster2  
PNKP cluster2  
ANHX cluster2  
POLR3A cluster2

ZFP90 cluster2  
EXOSC1 cluster2  
GCN1 cluster2  
C3orf58 cluster2  
N4BP1 cluster2  
MAP3K1 cluster2  
PPP1R14B cluster2  
DDX19A cluster2  
GPATCH3 cluster2  
SHQ1 cluster2  
IBTK cluster2  
RHBDD3 cluster2  
ENSA cluster2  
MAZ cluster2  
MTA3 cluster2  
CDK9 cluster2  
ZMAT5 cluster2  
TLE3 cluster2  
FBXO21 cluster2  
ZSWIM6 cluster2  
ZNF626 cluster2  
RNF145 cluster2  
KRI1 cluster2  
MRPL23 cluster2  
STX10 cluster2  
CTCF cluster2  
SOCS5 cluster2  
TFRC cluster2  
POP1 cluster2  
MARK2 cluster2  
ANGEL2 cluster2  
NELFB cluster2  
PCGF2 cluster2  
GNPDA1 cluster2  
ACVR1B cluster2  
TMEM55B cluster2  
TIMM44 cluster2  
SNX25 cluster2  
LINC00998 cluster2  
MRPS2 cluster2  
TP53BP1 cluster2  
IREB2 cluster2  
PPIH cluster2  
SMAGP cluster2  
RELA cluster2  
AK3 cluster2  
TRPC4AP cluster2  
QSOX2 cluster2  
NOP14 cluster2  
CROCC cluster2  
SCAF4 cluster2  
POU2F1 cluster2  
CYB5A cluster2  
TMEM203 cluster2  
EHMT2 cluster2  
PNRC2 cluster2

MED9 cluster2  
FHL2 cluster2  
MRPL55 cluster2  
VOPP1 cluster2  
TULP4 cluster2  
SIPA1L2 cluster2  
DIP2B cluster2  
BRAT1 cluster2  
MRPL35 cluster2  
RNF220 cluster2  
KIAA0907 cluster2  
ACTR1B cluster2  
ZNF84 cluster2  
JOSD1 cluster2  
CPSF4 cluster2  
PNMAL1 cluster2  
METTL2B cluster2  
ANKRD40 cluster2  
AKAP8 cluster2  
PRR14 cluster2  
SPTY2D1 cluster2  
NADK cluster2  
ABCC5 cluster2  
ABL2 cluster2  
SNX5 cluster2  
SEL1L cluster2  
TMED8 cluster2  
MLXIP cluster2  
ANKRD39 cluster2  
DPM2 cluster2  
DDIAS cluster2  
AKAP11 cluster2  
PHC3 cluster2  
SLC7A6OS cluster2  
LCLAT1 cluster2  
RAB11FIP2 cluster2  
TARS cluster2  
HILPDA cluster2  
WDR46 cluster2  
ZNF791 cluster2  
TDG cluster2  
RNASEH1 cluster2  
SCAP cluster2  
SEC31A cluster2  
INIP cluster2  
FAM83D cluster2  
ZYG11B cluster2  
MAP3K4 cluster2  
SMIM4 cluster2  
ZNF502 cluster2  
CTDNEP1 cluster2  
ATP5SL cluster2  
RCCD1 cluster2  
OSBPL11 cluster2  
ZNF511 cluster2  
KCTD3 cluster2

GLOD4 cluster2  
TP53BP2 cluster2  
MRPL40 cluster2  
XPO5 cluster2  
NUDT1 cluster2  
FAM133A cluster2  
PTP4A3 cluster2  
TMSB4X cluster2  
ZDHHC17 cluster2  
U2AF1 cluster2  
C12orf57 cluster2  
GTF2E1 cluster2  
NUP50 cluster2  
PARPBP cluster2  
TMEM138 cluster2  
CTSB cluster2  
COPG2 cluster2  
RPP14 cluster2  
MRPS18A cluster2  
CHTF18 cluster2  
RHOB cluster2  
SCAMP4 cluster2  
TSTD2 cluster2  
QSER1 cluster2  
SETD6 cluster2  
HS2ST1 cluster2  
MLLT6 cluster2  
IFNGR1 cluster2  
HOXB3 cluster2  
YTHDF3 cluster2  
DDX59 cluster2  
ACO2 cluster2  
IKZF5 cluster2  
GLYR1 cluster2  
RRN3 cluster2  
TWF1 cluster2  
MEST cluster2  
FBXO45 cluster2  
GTF2B cluster2  
TRIT1 cluster2  
ECSIT cluster2  
CHERP cluster2  
OTUD3 cluster2  
TMEM11 cluster2  
TPD52 cluster2  
VAPB cluster2  
TBC1D9B cluster2  
TRUB2 cluster2  
DLG1 cluster2  
CDC16 cluster2  
FAM173B cluster2  
TMEM131 cluster2  
NCOA6 cluster2  
EVL cluster2  
ACTR3B cluster2  
ELAC2 cluster2

PIKFYVE cluster2  
MSH3 cluster2  
AAAS cluster2  
MPV17 cluster2  
MPRIP cluster2  
DAG1 cluster2  
YIPF3 cluster2  
UBE3C cluster2  
CIC cluster2  
CDC37 cluster2  
ACTR5 cluster2  
ABHD17A cluster2  
CCDC124 cluster2  
MAT2B cluster2  
STX12 cluster2  
MRPL10 cluster2  
EML4 cluster2  
ANO10 cluster2  
ZNF3 cluster2  
TOB2 cluster2  
POR cluster2  
GBAS cluster2  
MED1 cluster2  
CDKN2AIPNL cluster2  
PUSL1 cluster2  
ACO1 cluster2  
FNBP1L cluster2  
KIAA1841 cluster2  
COX14 cluster2  
MTR cluster2  
FBXO28 cluster2  
NECAP1 cluster2  
FAM210A cluster2  
BTBD7 cluster2  
TEX10 cluster2  
SLC30A5 cluster2  
ILVBL cluster2  
NUP160 cluster2  
PPP4R3B cluster2  
APIP cluster2  
EBP cluster2  
MRE11A cluster2  
SNX4 cluster2  
PPTC7 cluster2  
MKNK2 cluster2  
PPT1 cluster2  
MMS19 cluster2  
TMEM167B cluster2  
ABCD3 cluster2  
ASNSD1 cluster2  
ETFDH cluster2  
COMMD9 cluster2  
NCAPH2 cluster2  
ERC1 cluster2  
GRPEL1 cluster2  
REPS1 cluster2

RPRD2 cluster2  
OSTM1 cluster2  
PSMD9 cluster2  
DFFA cluster2  
RABL2B cluster2  
DIAPH1 cluster2  
HDAC3 cluster2  
TRAF4 cluster2  
GLTP cluster2  
KLF10 cluster2  
HDLBP cluster2  
ZNF267 cluster2  
MKNK1 cluster2  
TCEA1 cluster2  
MYH10 cluster2  
RP11-255M2.3 cluster2  
LMLN cluster2  
RPA1 cluster2  
SDHAF2 cluster2  
DCAF8 cluster2  
CTNNA1 cluster2  
HDGF cluster2  
CARKD cluster2  
AUTS2 cluster2  
C5orf45 cluster2  
MRPS12 cluster2  
TAOK2 cluster2  
H1FX cluster2  
SUMO3 cluster2  
RNF157 cluster2  
AP3M2 cluster2  
FAM168B cluster2  
VPS72 cluster2  
ALG2 cluster2  
NAA16 cluster2  
RRAGC cluster2  
NECAP2 cluster2  
HM13 cluster2  
GPS1 cluster2  
COASY cluster2  
EHMT1 cluster2  
ATL2 cluster2  
RBM14 cluster2  
NUFIP1 cluster2  
TLN1 cluster2  
NGFRAP1 cluster2  
RAB5A cluster2  
CASP2 cluster2  
LRBA cluster2  
EPN2 cluster2  
SIPA1L1 cluster2  
AC090498.1 cluster2  
ARHGEF33 cluster2  
RUNX1 cluster2  
MIOS cluster2  
IDH3B cluster2

GOLGA3 cluster2  
TMED3 cluster2  
CREBBP cluster2  
ANKRA2 cluster2  
BPGM cluster2  
XPA cluster2  
WIZ cluster2  
NDN cluster2  
RGS12 cluster2  
TMEM69 cluster2  
RUNDC3B cluster2  
CWC22 cluster2  
ALG14 cluster2  
YAF2 cluster2  
NDUFS2 cluster2  
HNRNPL cluster2  
PCNX cluster2  
NIT1 cluster2  
GPKOW cluster2  
TUBD1 cluster2  
RHOG cluster2  
USB1 cluster2  
RBMXL1 cluster2  
VHL cluster2  
MAGEA12 cluster2  
METTL9 cluster2  
SMIM8 cluster2  
NUDT5 cluster2  
ATG16L1 cluster2  
WDSUB1 cluster2  
GOLPH3 cluster2  
SART1 cluster2  
DCBLD2 cluster2  
ZUFSP cluster2  
HEXA cluster2  
SPAST cluster2  
MTFMT cluster2  
MADD cluster2  
KCTD6 cluster2  
INO80 cluster2  
SCAF8 cluster2  
METTL8 cluster2  
BROX cluster2  
OXSR1 cluster2  
HIC2 cluster2  
THUMPD2 cluster2  
PBDC1 cluster2  
AC069277.2 cluster2  
ZNF226 cluster2  
DPY19L3 cluster2  
UVRAG cluster2  
COG2 cluster2  
ERCC3 cluster2  
CBFB cluster2  
PRRC1 cluster2  
RPP21 cluster2

AKT2 cluster2  
TBCD cluster2  
KIAA0368 cluster2  
PAN3 cluster2  
ZNF532 cluster2  
DDX41 cluster2  
EXOC2 cluster2  
GABPB1 cluster2  
HNRNPU cluster2  
C18orf8 cluster2  
FNIP2 cluster2  
SBF1 cluster2  
AKAP17A cluster2  
TCHP cluster2  
ZMYND11 cluster2  
MED25 cluster2  
SNRPD2 cluster3  
LUZP1 cluster3  
OAZ2 cluster3  
NRBP1 cluster3  
KIF21A cluster3  
ERGIC3 cluster3  
TEX19 cluster3  
SCML1 cluster3  
CLSPN cluster3  
DPH7 cluster3  
TEX101 cluster3  
MEIOB cluster3  
DNAJC1 cluster3  
KCNQ10T1 cluster3  
GPAA1 cluster3  
HORMAD1 cluster3  
GINS2 cluster3  
SYCP2 cluster3  
VPS29 cluster3  
SYCE2 cluster3  
ZCCHC17 cluster3  
ABCA5 cluster3  
CCDC73 cluster3  
SYCE1 cluster3  
PRAP1 cluster3  
CT47B1 cluster3  
NPTX2 cluster3  
PRSS21 cluster3  
PRIM1 cluster3  
TCTEX1D2 cluster3  
TMEM59 cluster3  
C11orf85 cluster3  
SFR1 cluster3  
FAM9B cluster3  
FAM9C cluster3  
C20orf24 cluster3  
FAM105A cluster3  
SMCHD1 cluster3  
TAOK3 cluster3  
INCA1 cluster3



RNF34 cluster3  
WNK1 cluster3  
MRPL18 cluster3  
CDC6 cluster3  
STAG3 cluster3  
MPC1 cluster3  
BRCA1 cluster3  
DMC1 cluster3  
CYP20A1 cluster3  
RP13-347D8.7 cluster3  
C19orf52 cluster3  
CCNDBP1 cluster3  
VPS35 cluster3  
RNF212B cluster3  
CT55 cluster3  
BEND2 cluster3  
CMC2 cluster3  
STRIP2 cluster3  
GPAT2 cluster3  
YME1L1 cluster3  
CHID1 cluster3  
GGCT cluster3  
LLNLR-245B6.1 cluster3  
HLA-B cluster3  
C19orf57 cluster3  
FLYWCH2 cluster3  
HIF1A cluster3  
TMEM147 cluster3  
KIF1A cluster3  
AAMDC cluster3  
HDAC6 cluster3  
PGRMC1 cluster3  
RRM1 cluster3  
RNF216 cluster3  
ARL1 cluster3  
TEX12 cluster3  
TOP2B cluster3  
RAD51AP2 cluster3  
CCDC79 cluster3  
EIF2S1 cluster3  
LPCAT2 cluster3  
OTUD6A cluster3  
PEG10 cluster3  
C12orf65 cluster3  
PSMA8 cluster3  
EYA3 cluster3  
YIPF4 cluster3  
ESCO2 cluster3  
SGSM3 cluster3  
TRAFD1 cluster3  
CNTRL cluster3  
UBE2F cluster3  
RAB6A cluster3  
HAUS5 cluster3  
IQSEC3 cluster3  
HSPA14 cluster3

TEX15 cluster3  
ASF1B cluster3  
MAGEA10 cluster3  
RBM6 cluster3  
ANKRD31 cluster3  
CCNB1IP1 cluster3  
ATP6AP2 cluster3  
JADE3 cluster3  
NFAT5 cluster3  
POU2F2 cluster3  
CCNE2 cluster3  
AC005324.6 cluster3  
RAD9B cluster3  
CENPU cluster3  
SYNGR4 cluster3  
RHNO1 cluster3  
PKMYT1 cluster3  
CCDC152 cluster3  
C21orf58 cluster3  
CTNNAL1 cluster3  
ATP11C cluster3  
PRDM9 cluster3  
RAD51C cluster3  
PIGS cluster3  
CCDC47 cluster3  
GOLGA2 cluster3  
ARHGAP5 cluster3  
GTF2H2 cluster3  
NUP107 cluster3  
LTBP4 cluster3  
PDHA1 cluster3  
ZNF280B cluster3  
FZD3 cluster3  
TIPIN cluster3  
FBXL5 cluster3  
MCM3AP-AS1 cluster3  
DMRTC2 cluster3  
FAM9A cluster3  
WDR6 cluster3  
CHGB cluster3  
FEN1 cluster3  
FANCI cluster3  
MCM8 cluster3  
BBS4 cluster3  
EEA1 cluster3  
EP400 cluster3  
MEIOC cluster3  
ATAD5 cluster3  
XX-CR54.1 cluster3  
CPT2 cluster3  
Clorf146 cluster3  
BHMG1 cluster3  
MARK3 cluster3  
ISY1 cluster3  
ERP44 cluster3  
DHX40 cluster3

PCGF6 cluster3  
SLC39A1 cluster3  
NUSAP1 cluster3  
FANCA cluster3  
TMEM116 cluster3  
PPIC cluster3  
FBXO47 cluster3  
SDHD cluster3  
CKAP5 cluster3  
STXBP1 cluster3  
RIC8A cluster3  
CHD9 cluster3  
PIGK cluster3  
FBXO11 cluster3  
CHEK1 cluster3  
NOL8 cluster3  
ITFG1 cluster3  
TSPAN3 cluster3  
GDE1 cluster3  
PHIP cluster3  
C14orf39 cluster3  
STK25 cluster3  
MAGEA11 cluster3  
VMP1 cluster3  
COCH cluster3  
CNOT6L cluster3  
CCNB3 cluster3  
SGK494 cluster3  
TTC32 cluster3  
DCK cluster3  
C15orf40 cluster3  
HIST1H2AA cluster3  
MAGEA9B cluster3  
GOLGB1 cluster3  
ARHGEF10 cluster3  
TPST1 cluster3  
ACSS2 cluster3  
U82695.5 cluster3  
7-Sep cluster3  
PTK2 cluster3  
FAM208B cluster3  
PEG3 cluster3  
CNTLN cluster3  
C6orf203 cluster3  
ACTR3 cluster3  
TIPRL cluster3  
CDC45 cluster3  
ETFA cluster3  
RFC4 cluster3  
HDDC3 cluster3  
ACBD3 cluster3  
NDUFS1 cluster3  
CABIN1 cluster3  
LINC01024 cluster3  
SAM4B cluster3  
POLE cluster3

MRPL11 cluster3  
PAGE4 cluster3  
SMC1A cluster3  
CRY1 cluster3  
ZW10 cluster3  
MACF1 cluster3  
LARS cluster3  
MSH2 cluster3  
EPB41 cluster3  
FBXO5 cluster3  
PAK1 cluster3  
LAMTOR3 cluster3  
PHTF2 cluster3  
CDKN2C cluster3  
HLA-C cluster3  
KMT5C cluster3  
XKR9 cluster3  
ANKHD1 cluster3  
BMPR2 cluster3  
GALNT11 cluster3  
SNCA cluster3  
AP1S2 cluster3  
NDUFA10 cluster3  
MMP25-AS1 cluster3  
RRM2 cluster3  
SERPINH1 cluster3  
HAUS3 cluster3  
HINFP cluster3  
SLMAP cluster3  
ATP6AP1 cluster3  
C18orf63 cluster3  
ZNF714 cluster3  
TEX11 cluster3  
ZWINT cluster3  
TMEM97 cluster3  
MLEC cluster3  
PROCR cluster3  
BBS7 cluster3  
PXMP2 cluster3  
CRELD1 cluster3  
SYCP1 cluster3  
TIGD3 cluster3  
C16orf70 cluster3  
PRDX4 cluster3  
KDELR1 cluster3  
GDPD1 cluster3  
PRPF18 cluster3  
SPO11 cluster3  
CLN8 cluster3  
MAGEA1 cluster3  
GABPB2 cluster3  
PSMC3IP cluster3  
GLCE cluster3  
NSD1 cluster3  
SENP5 cluster3  
TUSC3 cluster3

SUCO cluster3  
SH3KBP1 cluster3  
HFM1 cluster3  
CCP110 cluster3  
RACGAP1 cluster3  
TCHH cluster3  
PRSS38 cluster3  
LRRC41 cluster3  
AADAT cluster3  
SPCS3 cluster3  
IFT81 cluster3  
RHOT1 cluster3  
P4HA1 cluster3  
DENND2C cluster3  
RP11-160H22.5 cluster3  
CSPP1 cluster3  
KREMEN2 cluster3  
ZNF446 cluster3  
PSMD5-AS1 cluster3  
SYTL1 cluster3  
BOD1L1 cluster3  
CEP78 cluster3  
DSEL cluster3  
NCAPG cluster3  
FAM157C cluster3  
PAX6 cluster3  
CCDC122 cluster3  
NCOA3 cluster3  
LETM1 cluster3  
USP47 cluster3  
NUMB cluster3  
HESX1 cluster3  
PBX3 cluster3  
TRIP13 cluster3  
BFAR cluster3  
EXOC5 cluster3  
PKN2 cluster3  
SSX1 cluster3  
H2AFX cluster3  
BUB1B cluster3  
THOC2 cluster3  
FHOD1 cluster3  
MED8 cluster3  
IPO9 cluster3  
RP11-522I20.3 cluster3  
BLOC1S2 cluster3  
MYT1L cluster3  
C6orf136 cluster3  
REL cluster3  
CENPP cluster3  
HADHA cluster3  
TNKS2-AS1 cluster3  
CLASRP cluster3  
ANAPC7 cluster3  
RP11-422P24.12 cluster3  
DLEU2 cluster3

COPB2 cluster3  
PTGR2 cluster3  
KNTC1 cluster3  
CES2 cluster3  
AP006222.2 cluster3  
GBA cluster3  
ACTN4 cluster3  
WEE1 cluster3  
PPIP5K2 cluster3  
APPL1 cluster3  
PJA2 cluster3  
CUTA cluster3  
SLC35B1 cluster3  
WDR3 cluster3  
DONSON cluster3  
FAM98C cluster3  
SPTBN1 cluster3  
CCDC18 cluster3  
PCMTD2 cluster3  
BET1 cluster3  
C9orf84 cluster3  
CCDC15 cluster3  
DIP2A cluster3  
PRDM7 cluster3  
SLC31A1 cluster3  
CLDN18 cluster3  
SPAG7 cluster3  
MMD cluster3  
SLC25A17 cluster3  
RAPH1 cluster3  
CCDC64 cluster3  
MYOM2 cluster3  
NDC80 cluster3  
TMUB2 cluster3  
ARFGEF1 cluster3  
C3orf14 cluster3  
KLHL22 cluster3  
COQ2 cluster3  
ANKRD12 cluster3  
STOM cluster3  
FBXL20 cluster3  
CALY cluster3  
CCDC93 cluster3  
CCDC58 cluster3  
TAF4B cluster3  
PLA2G12A cluster3  
RFWD2 cluster3  
VAMP7 cluster3  
LINC01140 cluster3  
TRAPPC8 cluster3  
VWA9 cluster3  
CHST12 cluster3  
NPRL3 cluster3  
HORMAD2 cluster3  
MAPKAPK5-AS1 cluster3  
ZNF280C cluster3

GBF1 cluster3  
ADCK5 cluster3  
KLHL8 cluster3  
CISD2 cluster3  
KIF18A cluster3  
FN3KRP cluster3  
PIP5K1A cluster3  
SGCE cluster3  
SRR cluster3  
MNT cluster3  
LPCAT3 cluster3  
AUNIP cluster3  
ALG13 cluster3  
UBL7-AS1 cluster3  
CTSV cluster3  
OAT cluster3  
SMARCC2 cluster3  
TOP3A cluster3  
CNPY2 cluster3  
PHF8 cluster3  
C5orf42 cluster3  
POLA2 cluster3  
TMEM52 cluster3  
DCTN5 cluster3  
MROH1 cluster3  
MTMR9 cluster3  
ZNF318 cluster3  
GMEB1 cluster3  
RTCA cluster3  
NDUFS5 cluster3  
CENPN cluster3  
CERCAM cluster3  
ERBB3 cluster3  
UHRF2 cluster3  
SLC39A10 cluster3  
KANSL2 cluster3  
AMN cluster3  
DDHD2 cluster3  
COG4 cluster3  
PRPF38A cluster3  
ZFYVE16 cluster3  
AASDH cluster3  
TRAF3IP2-AS1 cluster3  
ZNF672 cluster3  
EXT2 cluster3  
WDR76 cluster3  
GAL3ST1 cluster3  
ASZ1 cluster3  
KIAA0100 cluster3  
YTHDC2 cluster3  
N4BP2L2 cluster3  
B3GALNT2 cluster3  
FAM41C cluster3  
ARFRP1 cluster3  
SLC9A5 cluster3  
EPB41L2 cluster3

TRA2A cluster3  
MAGEB6 cluster3  
SETD5 cluster3  
PPP5C cluster3  
MXI1 cluster3  
NT5C3A cluster3  
HAUS6 cluster3  
P3H1 cluster3  
SRBD1 cluster3  
LCMT2 cluster3  
ZNHIT6 cluster3  
EPS15 cluster3  
MTMR14 cluster3  
KMT2A cluster3  
MICU1 cluster3  
CLSTN1 cluster3  
EIF2A cluster3  
TEX13D cluster3  
CRNKL1 cluster3  
RPP25L cluster3  
FANCD2 cluster3  
SPECC1 cluster3  
MUM1 cluster3  
CCDC144A cluster3  
FAM114A2 cluster3  
TMEM242 cluster3  
PIK3C2A cluster3  
PIDD1 cluster3  
PTPN4 cluster3  
FIGNL1 cluster3  
ECT2 cluster3  
RBM26-AS1 cluster3  
CCDC155 cluster3  
STMND1 cluster3  
RBMXL3 cluster3  
PARP12 cluster3  
IL6ST cluster3  
SNX16 cluster3  
YTHDF1 cluster3  
PXDN cluster3  
SUMF2 cluster3  
HTRA2 cluster3  
CENPL cluster3  
SF3B3 cluster3  
SLC35F5 cluster3  
AAGAB cluster3  
MOAP1 cluster3  
CS cluster3  
CDC27 cluster3  
TSC22D2 cluster3  
C17orf75 cluster3  
AREG cluster3  
PALB2 cluster3  
ASCC3 cluster3  
LSS cluster3  
MEI1 cluster3



RNASEH2B cluster3  
RAD51 cluster3  
CEP192 cluster3  
HAT1 cluster3  
RAF1 cluster3  
KIF11 cluster3  
PGD cluster3  
Clorf112 cluster3  
NFE2L1 cluster3  
CEP290 cluster3  
MDC1 cluster3  
VEZT cluster3  
VKORC1 cluster3  
M1AP cluster3  
DAAM1 cluster3  
ROCK2 cluster3  
PRPF3 cluster3  
ORC4 cluster3  
NRXN2 cluster3  
MAP3K3 cluster3  
ME2 cluster3  
SETD2 cluster3  
HUWE1 cluster3  
NFYB cluster3  
TAOK1 cluster3  
CBWD1 cluster3  
UFL1 cluster3  
MCM10 cluster3  
SENP1 cluster3  
ATP9B cluster3  
ZNF257 cluster3  
GTF2H2C cluster3  
IGF2BP1 cluster3  
SLC24A1 cluster3  
LINC01572 cluster3  
RASAL2 cluster3  
TRAPPC6B cluster3  
XBP1 cluster3  
ZNF326 cluster3  
CTNND1 cluster3  
BAIAP2L1 cluster3  
SPG11 cluster3  
CD2AP cluster3  
PITPNB cluster3  
PLGRKT cluster3  
Clorf109 cluster3  
CBWD5 cluster3  
PLAC1 cluster3  
RP11-192H23.6 cluster3  
STK17B cluster3  
P4HA2 cluster3  
ARID4B cluster3  
AGTPBP1 cluster3  
EAF2 cluster3  
MMS22L cluster3  
MED14 cluster3

SBF2-AS1 cluster3  
ZHX1 cluster3  
SHCBP1 cluster3  
PANK3 cluster3  
IKBIP cluster3  
MAP2K1 cluster3  
CTNNB1 cluster3  
HUS1B cluster3  
PHRF1 cluster3  
PDCD6IP cluster3  
PGM2L1 cluster3  
IFIT5 cluster3  
MESP1 cluster3  
AGFG2 cluster3  
CLDN10 cluster3  
GART cluster3  
ZNF99 cluster3  
MAPKAP1 cluster3  
RP11-486G15.2 cluster3  
NCAPG2 cluster3  
RABGAP1 cluster3  
LYST cluster3  
RECK cluster3  
C11orf24 cluster3  
AC002480.2 cluster3  
TMEM128 cluster3  
SNAPC5 cluster3  
P4HA3 cluster3  
JPX cluster3  
TBCCD1 cluster3  
GNPDA2 cluster3  
RP11-1C8.7 cluster3  
VPS13A cluster3  
CCDC172 cluster3  
ZDHC13 cluster3  
PARP10 cluster3  
SDR39U1 cluster3  
CPEB4 cluster3  
FXR2 cluster3  
PDE3B cluster3  
LIMK2 cluster3  
ZNF136 cluster3  
UGT8 cluster3  
PEMT cluster3  
GTF3C3 cluster3  
ATR cluster3  
TMEM30A cluster3  
NDUFV1 cluster3  
ZNF324 cluster3  
KLHL24 cluster3  
DLAT cluster3  
FBXO4 cluster3  
TMEM206 cluster3  
CXXC1 cluster3  
NEK8 cluster3  
RDH11 cluster3

HOOK2 cluster3  
TCEANC2 cluster3  
EXOG cluster3  
LNPEP cluster3  
ROBO3 cluster3  
ZNF622 cluster3  
DLGAP5 cluster3  
ZNF800 cluster3  
DMXL1 cluster3  
SMIM13 cluster3  
KDM2A cluster3  
TSPYL1 cluster3  
H1F0 cluster3  
FNDC3A cluster3  
ISCU cluster3  
PWWP2A cluster3  
FBXO22 cluster3  
VASP cluster3  
PRPF40B cluster3  
SLK cluster3  
CRLF3 cluster3  
TSC22D3 cluster3  
TMEM259 cluster3  
PDP2 cluster3  
TIMM10B cluster3  
PSME2 cluster3  
NCKAP1 cluster3  
AARS cluster3  
GTF2H3 cluster3  
DMXL2 cluster3  
RFWD3 cluster3  
ABCD4 cluster3  
RPA4 cluster3  
GPRASP2 cluster3  
EBAG9 cluster3  
USP37 cluster3  
RAB41 cluster3  
USP33 cluster3  
RBL1 cluster3  
ATM cluster3  
MAGEC1 cluster3  
TMEM101 cluster3  
DDX23 cluster3  
HCCS cluster3  
UTP20 cluster3  
KHDC1 cluster3  
EMD cluster3  
LMBRD2 cluster3  
ZCCHC9 cluster3  
RSPRY1 cluster3  
NPAP1 cluster3  
LINC00936 cluster3  
NMD3 cluster3  
MFN1 cluster3  
RIMS2 cluster3  
NUCB1 cluster3

ANKIB1 cluster3  
TCTN1 cluster3  
MBD6 cluster3  
HSD17B14 cluster3  
MTBP cluster3  
LMF1 cluster3  
FOXN2 cluster3  
TMEM237 cluster3  
ZNF394 cluster3  
HSD17B4 cluster3  
PTPDC1 cluster3  
PIK3CB cluster3  
MSH4 cluster3  
SAP30 cluster3  
ZNF655 cluster3  
DBF4B cluster3  
API5 cluster3  
C11orf54 cluster3  
PPP1R16A cluster3  
RP11-78J21.4 cluster3  
OGFOD1 cluster3  
USP6 cluster3  
MAP4 cluster3  
MELK cluster3  
BRPF3 cluster3  
MPP2 cluster3  
CTD-3193K9.4 cluster3  
FOXRED1 cluster3  
TESK2 cluster3  
BOD1 cluster3  
RBM4 cluster3  
RQCD1 cluster3  
C20orf194 cluster3  
DNASE1 cluster3  
SNX27 cluster3  
RALGAPB cluster3  
XRN1 cluster3  
SDCCAG8 cluster3  
COQ9 cluster3  
RC3H2 cluster3  
ZNF232 cluster3  
PAPOLG cluster3  
METTL4 cluster3  
VPS36 cluster3  
CES4A cluster3  
ZNF280D cluster3  
KIAA1211L cluster3  
PPM1B cluster3  
UBR5-AS1 cluster3  
ZMYM6 cluster3  
RB1 cluster3  
KIF1BP cluster3  
POLR1E cluster3  
PEX1 cluster3  
ZSWIM8 cluster3  
TXLNA cluster3

RANBP2 cluster3  
ZNFX1 cluster3  
AC020956.3 cluster3  
ZBED5 cluster3  
E2F4 cluster3  
DPEP2 cluster3  
STAG2 cluster3  
ZNF92 cluster3  
ERLIN2 cluster3  
RP4-669L17.10 cluster3  
TDRKH cluster3  
ZNF454 cluster3  
KCTD9 cluster3  
XRCC2 cluster3  
KMT2C cluster3  
UCHL5 cluster3  
YDJC cluster3  
PDIK1L cluster3  
TMEM175 cluster3  
RELT cluster3  
RP11-398K22.12 cluster3  
LMBR1 cluster3  
POLM cluster3  
FARP2 cluster3  
IQCH cluster3  
DCP2 cluster3  
RECQL4 cluster3  
N4BP2 cluster3  
OTULIN cluster3  
HEATR5A cluster3  
PSMD5 cluster3  
CXorf67 cluster3  
UNK cluster3  
WDR44 cluster3  
STIM1 cluster3  
ZCCHC7 cluster3  
USP48 cluster3  
TMEM98 cluster3  
VCL cluster3  
CDK5RAP1 cluster3  
ZGRF1 cluster3  
METTL14 cluster3  
MTOR cluster3  
EMSY cluster3  
BLOC1S6 cluster3  
MDK cluster3  
ADARB1 cluster3  
RP11-983P16.4 cluster3  
ZC3HC1 cluster3  
PTPRK cluster3  
KLC2 cluster3  
CHD1 cluster3  
MAPK7 cluster3  
EPM2AIP1 cluster3  
ZNF738 cluster3  
FAM193A cluster3

TRPM7 cluster3  
MAT2A cluster3  
PCBP3 cluster3  
PDE8A cluster3  
CDK13 cluster3  
DNM1L cluster3  
GPALPP1 cluster3  
RNF24 cluster3  
TMEM33 cluster3  
C19orf54 cluster3  
CDK18 cluster3  
FBXO48 cluster3  
TRABD cluster3  
XAGE3 cluster3  
NFXL1 cluster3  
FANCG cluster3  
USP51 cluster3  
RAD18 cluster3  
PTPN23 cluster3  
TMCC1 cluster3  
JMY cluster3  
STAM cluster3  
ARHGAP5-AS1 cluster3  
NBPF1 cluster3  
ACAD8 cluster3  
ZNF557 cluster3  
TMEM17 cluster3  
SKA2 cluster3  
C2orf44 cluster3  
UCK1 cluster3  
UBAP2L cluster3  
AJ011932.1 cluster3  
ADIPOR2 cluster3  
CSGALNACT2 cluster3  
ZNF430 cluster3  
RBFOX2 cluster3  
UBXN2A cluster3  
RAB3GAP1 cluster3  
SIL1 cluster3  
CCNL2 cluster3  
DHRS13 cluster3  
FNNTA cluster3  
STT3A cluster3  
ZNF292 cluster3  
LACC1 cluster3  
PPP2R3B cluster3  
FCHO2 cluster3  
ZFC3H1 cluster3  
HMGXB3 cluster3  
PHLPP2 cluster3  
HIPK1 cluster3  
GPR89A cluster3  
CRTC2 cluster3  
PBX4 cluster3  
EXOC3 cluster3  
TUBB8 cluster3

FBXL12 cluster3  
PDE12 cluster3  
NUFIP2 cluster3  
RPS6KL1 cluster3  
DNAJC25 cluster3  
PAPD5 cluster3  
ZNF652 cluster3  
CMTM6 cluster3  
PEX11B cluster3  
CSTF2 cluster3  
PPP4R4 cluster3  
ARFGEF2 cluster3  
GATAD2B cluster3  
OXCT1 cluster3  
EIF3J-AS1 cluster3  
FGF14-AS2 cluster3  
TM9SF3 cluster3  
ZNF17 cluster3  
MCMDC2 cluster3  
CLK1 cluster3  
SNTB2 cluster3  
KIF14 cluster3  
ALG5 cluster3  
FAM188A cluster3  
ATPAF2 cluster3  
ACAA2 cluster3  
MASTL cluster3  
TMEM216 cluster3  
ZNF541 cluster3  
PAWR cluster3  
TTC33 cluster3  
PLEKHA1 cluster3  
NARF cluster3  
PIGO cluster3  
ZNF98 cluster3  
ABHD17B cluster3  
ELMOD2 cluster3  
INTS4 cluster3  
POLR3B cluster3  
AC136616.1 cluster3  
MAP3K13 cluster3  
ARHGAP20 cluster3  
GGT7 cluster3  
PEX12 cluster3  
PNPLA4 cluster3  
MAN2A1 cluster3  
SOWAHC cluster3  
EXOC6 cluster3  
HERC1 cluster3  
DIP2C cluster3  
ZC3H8 cluster3  
AF186192.6 cluster3  
GGCX cluster3  
FAM20B cluster3  
AGBL4 cluster3  
CEPT1 cluster3

UQCRQ cluster3  
TRIM41 cluster3  
TMUB1 cluster3  
RRM2B cluster3  
KDM6A cluster3  
SELK cluster3  
RAB5B cluster3  
BANP cluster3  
SENP7 cluster3  
SIAH1 cluster3  
ZNF37A cluster3  
SCAI cluster3  
YIPF6 cluster3  
CHUK cluster3  
TINF2 cluster3  
SCMH1 cluster3  
DDX28 cluster3  
STXBP5L cluster3  
TMEM39A cluster3  
TAF7L cluster3  
IPO7 cluster3  
USP28 cluster3  
POLN cluster3  
CSTF2T cluster3  
AP3M1 cluster3  
MDM4 cluster3  
FAM45A cluster3  
QSOX1 cluster3  
JOSD2 cluster3  
SLC35A3 cluster3  
C7orf49 cluster3  
NFATC3 cluster3  
RP11-83A24.2 cluster3  
NETO2 cluster3  
STIL cluster3  
TMEM161B cluster3  
RP11-160E2.6 cluster3  
TEFM cluster3  
ARFIP2 cluster3  
CEP72 cluster3  
SNRNP48 cluster3  
TRIM32 cluster3  
SEC16A cluster3  
MYBL1 cluster3  
HSPA13 cluster3  
SUPT7L cluster3  
DHRSX cluster3  
DHX34 cluster3  
ZNF250 cluster3  
PPM1F cluster3  
CENPBD1 cluster3  
UTP23 cluster3  
CEP250 cluster3  
FAM189B cluster3  
RNF8 cluster3  
C19orf38 cluster3



ERCC2 cluster3  
IQCC cluster3  
LINC00667 cluster3  
USP40 cluster3  
ZBTB21 cluster3  
LIN9 cluster3  
PIGM cluster3  
CHD8 cluster3  
SMG1 cluster3  
MFN2 cluster3  
GIT2 cluster3  
CFAP70 cluster3  
PBRM1 cluster3  
UBE2D1 cluster3  
SEC22B cluster3  
PLEKHG4 cluster3  
RASA1 cluster3  
TRIM52 cluster3  
ATRN cluster3  
PUDP cluster3  
UBAC2 cluster3  
FO538757.2 cluster3  
NRSN2 cluster3  
BIN2 cluster3  
MORC2 cluster3  
GDAP2 cluster3  
ANKRD46 cluster3  
PI4KA cluster3  
ACADVL cluster3  
LRP11 cluster3  
PHF23 cluster3  
KIDINS220 cluster3  
PAXBP1 cluster3  
TRIM23 cluster3  
IVNS1ABP cluster3  
SLC39A6 cluster3  
10-Sep cluster3  
ZNF34 cluster3  
SEPSECS cluster3  
ADD1 cluster3  
FOXJ3 cluster3  
FAM126B cluster3  
TMEM68 cluster3  
NEK9 cluster3  
RC3H1 cluster3  
UGGT2 cluster3  
PAXIP1 cluster3  
PLEKHF2 cluster3  
PRIMPOL cluster3  
ENTPD5 cluster3  
RNF121 cluster3  
NIFK-AS1 cluster3  
AC010524.2 cluster3  
GML cluster3  
IDH3A cluster3  
VCPIP1 cluster3

NAA25 cluster3  
RAB40C cluster3  
NSF cluster3  
TC2N cluster3  
SERINC1 cluster3  
KATNBL1 cluster3  
CRCP cluster3  
RP11-332H14.2 cluster3  
DNAJC3-AS1 cluster3  
VPS13C cluster3  
BEX4 cluster3  
MED13 cluster3  
RP11-412D9.4 cluster3  
LGMN cluster3  
ITGB1BP1 cluster3  
GGACT cluster3  
RP11-446F3.2 cluster3  
ADAM17 cluster3  
KIAA0319L cluster3  
SUPV3L1 cluster3  
ZFP82 cluster3  
ZSCAN32 cluster3  
FBX08 cluster3  
IPPK cluster3  
CCNC cluster3  
VPS16 cluster3  
SLC35B3 cluster3  
ATF6 cluster3  
COMMD7 cluster3  
RCHY1 cluster3  
KIF1B cluster3  
ZNF398 cluster3  
FUOM cluster3  
MYEF2 cluster3  
ZMYM2 cluster3  
ZNF721 cluster3  
WDR90 cluster3  
PRKD3 cluster3  
COG6 cluster3  
BOLA1 cluster3  
RGL2 cluster3  
PPME1 cluster3  
SMURF2 cluster3  
NSUN6 cluster3  
ATP6V0A1 cluster3  
C5orf63 cluster3  
RCOR1 cluster3  
SPICE1 cluster3  
GINM1 cluster3  
PRPF4 cluster3  
BTAF1 cluster3  
ZMYM1 cluster3  
PIK3R4 cluster3  
NXF1 cluster3  
ZNF431 cluster3  
MED30 cluster3

FAM234A cluster3  
CBWD2 cluster3  
TSPYL6 cluster3  
ZNF639 cluster3  
XIAP cluster3  
PUM1 cluster3  
ERI2 cluster3  
ST8SIA6-AS1 cluster3  
C18orf25 cluster3  
CASC4 cluster3  
GANC cluster3  
APTR cluster3  
MUT cluster3  
AP4M1 cluster3  
SPPL2A cluster3  
CEP95 cluster3  
PPP6R3 cluster3  
PCOLCE cluster3  
CAMSAP2 cluster3  
POLDIP2 cluster3  
DIS3L cluster3  
STX16 cluster3  
TNRC6A cluster3  
TTC19 cluster3  
NUP153 cluster3  
SPC25 cluster3  
CYHR1 cluster3  
UBR4 cluster3  
CLTC cluster3  
SLC5A6 cluster3  
PEF1 cluster3  
CORO1C cluster3  
PAXIP1-AS1 cluster3  
RCOR3 cluster3  
HN1L cluster3  
RAD51AP1 cluster3  
WDFY2 cluster3  
ATAD2B cluster3  
RLF cluster3  
MORC3 cluster3  
THOC5 cluster3  
COPA cluster3  
RP11-544A12.8 cluster3  
TM7SF2 cluster3  
ERRFI1 cluster3  
OFD1 cluster3  
MACROD2 cluster3  
ITCH cluster3  
TARSL2 cluster3  
ASB8 cluster3  
UBE2G2 cluster3  
CHORDC1 cluster3  
MOV10L1 cluster3  
RAB1A cluster3  
KIFAP3 cluster3  
KRTDAP cluster3

WDR73 cluster3  
FLJ37453 cluster3  
DDRKG1 cluster3  
FAR1 cluster3  
MSL3 cluster3  
SPG7 cluster3  
NEAT1 cluster3  
RP11-3B7.1 cluster3  
HOTAIR cluster3  
RGS5.1 cluster3  
HOXC6 cluster3  
NET1 cluster3  
ZNF662 cluster3  
MAU2 cluster3  
WDR11 cluster3  
KIN cluster3  
FAM98B cluster3  
TNFAIP8L3 cluster3  
DMRT3 cluster3  
FTHL17 cluster3  
PHKB cluster3  
MAGEB1 cluster3  
HIST1H4C cluster4  
ZCWPW1 cluster4  
VCX3B cluster4  
SMC1B cluster4  
VCX cluster4  
SMC3 cluster4  
SYCP3 cluster4  
VCX3A cluster4  
TOP2A cluster4  
PRSS50 cluster4  
FMR1NB cluster4  
DUT cluster4  
HMGB1 cluster4  
VCX2 cluster4  
HMGB2 cluster4  
BCAP31 cluster4  
DPEP3 cluster4  
MALAT1 cluster4  
NASP cluster4  
HERC5 cluster4  
PIGP cluster4  
PTMA cluster4  
PSMD1 cluster4  
CBX1 cluster4  
BTG3 cluster4  
SDF2L1 cluster4  
HPRT1 cluster4  
HELLS cluster4  
TAF12 cluster4  
NCL cluster4  
SNRPB cluster4  
DSTN cluster4  
PAGE1 cluster4  
TEX30 cluster4

WBSCR22 cluster4  
CENPH cluster4  
CASC5 cluster4  
DDX24 cluster4  
C5orf47 cluster4  
YEATS4 cluster4  
NPM1 cluster4  
TTC3 cluster4  
U2SURP cluster4  
IQCB1 cluster4  
TMEM258 cluster4  
MT-CYB cluster4  
PPIA cluster4  
EIF5B cluster4  
RBM17 cluster4  
IER3IP1 cluster4  
POLR2F cluster4  
RHEB cluster4  
PPIG cluster4  
ROMO1 cluster4  
DNAJB11 cluster4  
CFDP1 cluster4  
THAP7 cluster4  
NIPBL cluster4  
ARPC5 cluster4  
C11orf58 cluster4  
SAE1 cluster4  
NPC2 cluster4  
MT-ATP6 cluster4  
DENR cluster4  
PTGES3 cluster4  
MYDGF cluster4  
SEC11A cluster4  
GPBP1 cluster4  
SUB1 cluster4  
MT-ND3 cluster4  
HLTF cluster4  
C1D cluster4  
PRPF31 cluster4  
HMCES cluster4  
RTN3 cluster4  
CHCHD2 cluster4  
CALM2 cluster4  
SRP14 cluster4  
HSP90AA1 cluster4  
MAP1LC3B cluster4  
RPL21 cluster4  
APLP2 cluster4  
PSMB2 cluster4  
LRPAP1 cluster4  
DDX46 cluster4  
TKTL1 cluster4  
SRSF9 cluster4  
TOPAZ1 cluster4  
ORMDL1 cluster4  
TMEM50B cluster4

ORC6 cluster4  
VRK1 cluster4  
VAPA cluster4  
TMED2 cluster4  
HIGD1A cluster4  
GOLGA7 cluster4  
SLBP cluster4  
ADAL cluster4  
RPA2 cluster4  
ATP6V0E1 cluster4  
CHAF1A cluster4  
TSPYL2 cluster4  
HNRNPH3 cluster4  
COA1 cluster4  
TAF11 cluster4  
EIF1B cluster4  
CLNS1A cluster4  
UQCRH cluster4  
GAGE2A cluster4  
UPF2 cluster4  
SLF1 cluster4  
CNBP cluster4  
BRCA2 cluster4  
SIVA1 cluster4  
TMEM179B cluster4  
TALDO1 cluster4  
SUMO2 cluster4  
SNRNP40 cluster4  
UBE2T cluster4  
HNRNPC cluster4  
SON cluster4  
PAGE2B cluster4  
APMAP cluster4  
FAM175A cluster4  
DAZL cluster4  
SNRPG cluster4  
TERF1 cluster4  
XRCC6 cluster4  
CDK12 cluster4  
SCAF11 cluster4  
TEX264 cluster4  
NFATC2IP cluster4  
GDI2 cluster4  
PCBP2 cluster4  
HNRNPR cluster4  
S100PBP cluster4  
ERP29 cluster4  
SDHC cluster4  
ARIH2 cluster4  
CTCF1 cluster4  
LAMTOR5 cluster4  
COX17 cluster4  
PSPC1 cluster4  
BAZ2A cluster4  
HNRNPA2B1 cluster4  
CALR cluster4

ZC3H13 cluster4  
ESF1 cluster4  
SRSF2 cluster4  
MAGEC2 cluster4  
PDCD7 cluster4  
TPR cluster4  
SSX3 cluster4  
TGS1 cluster4  
MT-ND5 cluster4  
DZIP3 cluster4  
ATF7IP2 cluster4  
GPATCH8 cluster4  
USP9X cluster4  
SNRPD1 cluster4  
KIAA1429 cluster4  
CKS2 cluster4  
DSN1 cluster4  
LY6K cluster4  
TMED10 cluster4  
PRPF8 cluster4  
HNRNPK cluster4  
NKAP cluster4  
MRFAP1 cluster4  
VBP1 cluster4  
RBM39 cluster4  
SMC4 cluster4  
SRRM2 cluster4  
PARN cluster4  
TMED9 cluster4  
ANP32B cluster4  
THRAP3 cluster4  
NAE1 cluster4  
CENPV cluster4  
PNISR cluster4  
OCIAD1 cluster4  
COX7B cluster4  
RBBP8 cluster4  
PAGE2 cluster4  
C19orf60 cluster4  
DNMT1 cluster4  
NKTR cluster4  
TMEM80 cluster4  
LMAN2 cluster4  
XRCC5 cluster4  
SELT cluster4  
RIF1 cluster4  
MAD2L1 cluster4  
PPA1 cluster4  
SEC62 cluster4  
ITM2B cluster4  
UBL5 cluster4  
ATAD2 cluster4  
TERF2IP cluster4  
SLC4A1AP cluster4  
LSM14A cluster4  
ATP6V1G1 cluster4

KIF5B cluster4  
PAGE5 cluster4  
KRIT1 cluster4  
CDC42 cluster4  
ITSN2 cluster4  
PITHD1 cluster4  
CCT3 cluster4  
ESCO1 cluster4  
SNX6 cluster4  
MED11 cluster4  
ARPC1A cluster4  
HP1BP3 cluster4  
YTHDF2 cluster4  
CNIH4 cluster4  
BANF1 cluster4  
PTPN12 cluster4  
ZDHHC4 cluster4  
HDAC2 cluster4  
DTD1 cluster4  
RPN2 cluster4  
RPS17 cluster4  
RPS21 cluster4  
SNW1 cluster4  
RSRP1 cluster4  
JMJD1C cluster4  
TIMM8B cluster4  
SPCS1 cluster4  
RAB7A cluster4  
SRP9 cluster4  
DDX1 cluster4  
RBBP7 cluster4  
USP1 cluster4  
ARGLU1 cluster4  
CTSL cluster4  
HDAC1 cluster4  
TPTE cluster4  
PNN cluster4  
M6PR cluster4  
MRPS26 cluster4  
HSPB11 cluster4  
CLTA cluster4  
METAP2 cluster4  
PDAP1 cluster4  
DDOST cluster4  
SNRPF cluster4  
RCN2 cluster4  
POLR2K cluster4  
YWHAE cluster4  
HSPA5 cluster4  
TPX2 cluster4  
EPCAM cluster4  
SUZ12 cluster4  
UTP6 cluster4  
DDB1 cluster4  
FASTK cluster4  
LSM6 cluster4



TAF15 cluster4  
TRIM44 cluster4  
DDX42 cluster4  
CMAS cluster4  
RAC1 cluster4  
CCAR1 cluster4  
CKAP2 cluster4  
UBE2B cluster4  
SPINT2 cluster4  
CENPK cluster4  
ARL5A cluster4  
TAX1BP1 cluster4  
TM2D1 cluster4  
RAB14 cluster4  
ISCA2 cluster4  
FABP5 cluster4  
HNRNPA3 cluster4  
MTF2 cluster4  
RNPS1 cluster4  
ATP6V0B cluster4  
RBM44 cluster4  
NXT1 cluster4  
SRSF3 cluster4  
NSFL1C cluster4  
SRSF7 cluster4  
RNF167 cluster4  
DNAJB6 cluster4  
FKBP2 cluster4  
STAG1 cluster4  
EBLN3 cluster4  
ATP5E cluster4  
OSTC cluster4  
RAB18 cluster4  
ILF2 cluster4  
RPS4Y1 cluster4  
SNRPE cluster4  
SKP1 cluster4  
PARK7 cluster4  
ZMYM5 cluster4  
PDIA3 cluster4  
RBX1 cluster4  
PTPRA cluster4  
KLC1 cluster4  
COX7A2L cluster4  
NRBF2 cluster4  
RHOA cluster4  
RAN cluster4  
SLC25A36 cluster4  
VCP cluster4  
BPTF cluster4  
TSG101 cluster4  
EIF3J cluster4  
ARPC3 cluster4  
UBA6 cluster4  
SNRNP70 cluster4  
SAFB cluster4

DDX18 cluster4  
TRMT6 cluster4  
KNOX1 cluster4  
JAGN1 cluster4  
VIMP cluster4  
CSE1L cluster4  
RABEP1 cluster4  
CHTOP cluster4  
ZNF770 cluster4  
ZMAT2 cluster4  
AKAP8L cluster4  
DCUN1D5 cluster4  
CCNI cluster4  
TMEM41B cluster4  
KIF20B cluster4  
HSP90B1 cluster4  
FAM208A cluster4  
STRADB cluster4  
SLC25A3 cluster4  
HNRNPAB cluster4  
NAA15 cluster4  
CIAPIN1 cluster4  
TMX1 cluster4  
PHF14 cluster4  
ANAPC15 cluster4  
SQLE cluster4  
NDUFA4 cluster4  
ZNF75A cluster4  
HNRNPUL1 cluster4  
PPP4R3A cluster4  
UIMC1 cluster4  
RBM25 cluster4  
MED31 cluster4  
CCT8 cluster4  
HNRNPA0 cluster4  
NEDD8 cluster4  
RPL18 cluster4  
RBPJ cluster4  
UBA2 cluster4  
CAND1 cluster4  
MLLT4 cluster4  
TCL1A cluster4  
CASP8AP2 cluster4  
GPANK1 cluster4  
ZFAND5 cluster4  
HSPE1 cluster4  
MPHOSPH8 cluster4  
DNAJA2 cluster4  
CIRBP cluster4  
KDM1A cluster4  
TMX2 cluster4  
LAMTOR1 cluster4  
STAU1 cluster4  
RP11-452F19.3 cluster4  
SRSF10 cluster4  
KDM5A cluster4

NOVA1 cluster4  
THUMPD3-AS1 cluster4  
DEK cluster4  
ATP2B1 cluster4  
ERH cluster4  
MOB4 cluster4  
SAR1A cluster4  
PRELID1 cluster4  
PPP2CA cluster4  
ZFR cluster4  
EIF4G2 cluster4  
BCCIP cluster4  
MAGEA3 cluster4  
RPS26 cluster4  
TOP1 cluster4  
DNAJC19 cluster4  
CMSS1 cluster4  
CHD4 cluster4  
MPHOSPH10 cluster4  
PFDN2 cluster4  
DHX29 cluster4  
SEC11C cluster4  
SSB cluster4  
WTAP cluster4  
TACC1 cluster4  
CHIC2 cluster4  
PDIA6 cluster4  
LAGE3 cluster4  
FAM133B cluster4  
HSPA8 cluster4  
SF3A3 cluster4  
TMEM87A cluster4  
AUP1 cluster4  
PDS5A cluster4  
CTR9 cluster4  
CHRAC1 cluster4  
HMG2 cluster4  
DDX21 cluster4  
AP3D1 cluster4  
HNRNPM cluster4  
ARFGAP3 cluster4  
WDR83OS cluster4  
ANAPC5 cluster4  
GABARAPL2 cluster4  
SMG6 cluster4  
POLR2L cluster4  
CNOT4 cluster4  
UBXN1 cluster4  
MTX2 cluster4  
CHMP2B cluster4  
ANKRD54 cluster4  
ZNF638 cluster4  
POLR2J cluster4  
MIS18BP1 cluster4  
C16orf87 cluster4  
RHOT2 cluster4

ICE1 cluster4  
SMARCA5 cluster4  
SHPRH cluster4  
PPP4C cluster4  
MIS18A cluster4  
LUC7L3 cluster4  
RAB10 cluster4  
SFT2D1 cluster4  
ZFYVE9 cluster4  
ACTR10 cluster4  
GOLGA4 cluster4  
SNX2 cluster4  
NUTF2 cluster4  
HNRNPDL cluster4  
SPEN cluster4  
PIGT cluster4  
ZSWIM7 cluster4  
ASH1L cluster4  
FBLN1 cluster4  
HSPD1 cluster4  
COMMD2 cluster4  
LSM2 cluster4  
KIAA2026 cluster4  
RFC3 cluster4  
NONO cluster4  
H2AFZ cluster4  
HERC2 cluster4  
ZNF207 cluster4  
MAGEA6 cluster4  
OSBPL8 cluster4  
OIP5 cluster4  
AAMP cluster4  
PDCD4 cluster4  
FBXW7 cluster4  
GNB1 cluster4  
RP11-382A20.3 cluster4  
YY1 cluster4  
DOCK7 cluster4  
TAF5 cluster4  
MRPL20 cluster4  
CDK4 cluster4  
RNF212 cluster4  
CBX3 cluster4  
SMC2 cluster4  
CRELD2 cluster4  
CNIH1 cluster4  
MAPK1IP1L cluster4  
NGDN cluster4  
FBXL3 cluster4  
NHLRC3 cluster4  
SEC61B cluster4  
SRRM1 cluster4  
CDCA8 cluster4  
HNRNPA1 cluster4  
TBCA cluster4  
PRC1 cluster4

NAP1L1 cluster4  
TRMT112 cluster4  
ANKRD26 cluster4  
MEAF6 cluster4  
KHDRBS1 cluster4  
RPL7L1 cluster4  
PSMC6 cluster4  
GOPC cluster4  
CPSF6 cluster4  
RFC2 cluster4  
CDKN2D cluster4  
VAMP3 cluster4  
PRPF6 cluster4  
PRMT5 cluster4  
TUBGCP2 cluster4  
SNRNP27 cluster4  
PSMA3 cluster4  
RALBP1 cluster4  
WBP4 cluster4  
TXNDC15 cluster4  
BOLA3 cluster4  
LSM5 cluster4  
ARHGAP29 cluster4  
TRIP11 cluster4  
ATXN2 cluster4  
SPDL1 cluster4  
TMEM57 cluster4  
CSTF3 cluster4  
SUMO1 cluster4  
RPS27L cluster4  
GLG1 cluster4  
PCOLCE2 cluster4  
GCC2 cluster4  
ZC3H15 cluster4  
FRA10AC1 cluster4  
SENP6 cluster4  
MND1 cluster4  
AC074117.10 cluster4  
DNAJC7 cluster4  
PDCD6 cluster4  
TVP23B cluster4  
KPNB1 cluster4  
BAZ1B cluster4  
FKBP1A cluster4  
DGUOK cluster4  
KRR1 cluster4  
DYNC1LI1 cluster4  
PSMA5 cluster4  
MOB1A cluster4  
POLR2J3 cluster4  
RNMT cluster4  
TIMM22 cluster4  
HMGXB4 cluster4  
LSM1 cluster4  
TM2D3 cluster4  
TMEM167A cluster4

NEMF cluster4  
SRSF5 cluster4  
AFG3L2 cluster4  
TMEM18 cluster4  
PPIL4 cluster4  
MRPL13 cluster4  
PRKDC cluster4  
MRPS10 cluster4  
CREBRF cluster4  
CDK11A cluster4  
MCMBP cluster4  
RNF115 cluster4  
SNRPD3 cluster4  
HNRNPD cluster4  
P4HB cluster4  
YIPF5 cluster4  
LRIF1 cluster4  
DCTN1 cluster4  
DCTN3 cluster4  
TRMT10A cluster4  
PPP1R12A cluster4  
COX8A cluster4  
TMC01 cluster4  
TMEM50A cluster4  
AKAP9 cluster4  
ABCE1 cluster4  
XPO1 cluster4  
CDCA4 cluster4  
REV3L cluster4  
MT-ND4L cluster4  
MGME1 cluster4  
CDK11B cluster4  
POLR2H cluster4  
ILKAP cluster4  
CYB5B cluster4  
RBAK-RBAKDN cluster4  
SCAPER cluster4  
MSL1 cluster4  
POLR2B cluster4  
FTH1 cluster4  
ATG101 cluster4  
GABPB1-AS1 cluster4  
MESDC2 cluster4  
EIF1AY cluster4  
RAD1 cluster4  
VAMP2 cluster4  
DNAJC8 cluster4  
ATF6B cluster4  
RAB28 cluster4  
FGD5-AS1 cluster4  
PSMD10 cluster4  
ALKBH5 cluster4  
FAM49B cluster4  
KMT2E cluster4  
ILF3 cluster4  
MNAT1 cluster4

PSMA2 cluster4  
PHACTR4 cluster4  
HSF2 cluster4  
ATP6V1E1 cluster4  
MAP7D2 cluster4  
TMEM134 cluster4  
DDX6 cluster4  
BRD7 cluster4  
PUF60 cluster4  
HENMT1 cluster4  
CDC37L1 cluster4  
NCSTN cluster4  
C5orf24 cluster4  
IMPACT cluster4  
IARS cluster4  
TSEN15 cluster4  
TCERG1 cluster4  
HACD3 cluster4  
EIF2B1 cluster4  
CKS1B cluster4  
MBIP cluster4  
PHF5A cluster4  
PRCC cluster4  
CNOT7 cluster4  
PHAX cluster4  
ATP5C1 cluster4  
ATP5A1 cluster4  
BRWD1 cluster4  
GCLM cluster4  
GID8 cluster4  
WSB1 cluster4  
CENPE cluster4  
CEP85 cluster4  
BMS1 cluster4  
RBM28 cluster4  
SNRNP200 cluster4  
SET cluster4  
EZR cluster4  
SMARCB1 cluster4  
PRRC2C cluster4  
6-Mar cluster4  
OST4 cluster4  
LEMD3 cluster4  
PDS5B cluster4  
WDR33 cluster4  
NAP1L4 cluster4  
C11orf31 cluster4  
AIMP1 cluster4  
COPB1 cluster4  
MDH1 cluster4  
METTL5 cluster4  
MED28 cluster4  
MYL12B cluster4  
EIF5 cluster4  
RBBP4 cluster4  
RMDN3 cluster4

TIMM17B cluster4  
MRFAP1L1 cluster4  
RALGAPA1 cluster4  
TAF2 cluster4  
SFPQ cluster4  
MDN1 cluster4  
TMEM60 cluster4  
RBM26 cluster4  
ARF6 cluster4  
ITSN1 cluster4  
EIF4A1 cluster4  
ZC3H6 cluster4  
SRSF11 cluster4  
SPCS2 cluster4  
PDCD10 cluster4  
MAP3K2 cluster4  
GDI1 cluster4  
BCLAF1 cluster4  
DICER1 cluster4  
LYRM9 cluster4  
ABHD5 cluster4  
SPATS2 cluster4  
BDP1 cluster4  
ZNF22 cluster4  
DKC1 cluster4  
GNAI3 cluster4  
WNK3 cluster4  
MGA cluster4  
TIMMDC1 cluster4  
STOML2 cluster4  
RBM8A cluster4  
STK4 cluster4  
FYTTD1 cluster4  
YTHDC1 cluster4  
DLD cluster4  
ZCCHC11 cluster4  
PMVK cluster4  
PRPSAP1 cluster4  
ADD3 cluster4  
HSP90AB1 cluster4  
FUS cluster4  
HAUS1 cluster4  
CNOT6 cluster4  
TAF1B cluster4  
CD164 cluster4  
FANCL cluster4  
WHSC1L1 cluster4  
RSL1D1 cluster4  
WAPL cluster4  
SMC5 cluster4  
PPP4R2 cluster4  
RMI2 cluster4  
ZNF518A cluster4  
FNIP1 cluster4  
IST1 cluster4  
RRP15 cluster4



MALT1 cluster4  
MED19 cluster4  
PYCR2 cluster4  
VPS26A cluster4  
BRIX1 cluster4  
Clorf35 cluster4  
EIF4A2 cluster4  
SNRPA cluster4  
CLINT1 cluster4  
DMRTB1 cluster4  
TRA2B cluster4  
NOC3L cluster4  
EIF4A3 cluster4  
PHB2 cluster4  
ATP5G3 cluster4  
RUVBL1 cluster4  
DYNC1H1 cluster4  
KRAS cluster4  
RAD50 cluster4  
CDC42SE2 cluster4  
CCNK cluster4  
RPL22 cluster4  
SF3B1 cluster4  
SPNS1 cluster4  
NDUFAF4 cluster4  
FRG1 cluster4  
KIF22 cluster4  
TMEM107 cluster4  
RRBP1 cluster4  
SDF4 cluster4  
SUPT16H cluster4  
FAF2 cluster4  
RB1CC1 cluster4  
NSUN5 cluster4  
SMNDC1 cluster4  
SNX17 cluster4  
CCT6A cluster4  
TAF7 cluster4  
PTBP2 cluster4  
SIN3A cluster4  
ARCN1 cluster4  
STRAP cluster4  
DAXX cluster4  
NUP54 cluster4  
RNF214 cluster4  
PDIA4 cluster4  
CAMTA1 cluster4  
ATXN10 cluster4  
CNOT3 cluster4  
PPP3CB cluster4  
MAGOH cluster4  
NSL1 cluster4  
PHF3 cluster4  
BCL7B cluster4  
MED4 cluster4  
RAD54L2 cluster4

NOL11 cluster4  
EID1 cluster4  
SRSF1 cluster4  
MAN1A2 cluster4  
CSAD cluster4  
PIGH cluster4  
ATP2A2 cluster4  
DCTN6 cluster4  
TDRD9 cluster4  
RBM23 cluster4  
RIC3 cluster4  
LARP4 cluster4  
MED10 cluster4  
WDR75 cluster4  
PCNP cluster4  
NUP188 cluster4  
PRPF4B cluster4  
ARMC8 cluster4  
MZT1 cluster4  
EIF3A cluster4  
PRMT1 cluster4  
UBQLN1 cluster4  
ATF4 cluster4  
NUDC cluster4  
LSM8 cluster4  
MRPS5 cluster4  
ARF5 cluster4  
DPF2 cluster4  
DHX9 cluster4  
RSF1 cluster4  
POLR2C cluster4  
HSPA9 cluster4  
RICTOR cluster4  
DCAF4L1 cluster4  
STRN3 cluster4  
SASS6 cluster4  
CASC3 cluster4  
SYF2 cluster4  
UBN1 cluster4  
SMIM20 cluster4  
NCBP3 cluster4  
MLF2 cluster4  
SRSF4 cluster4  
DTWD1 cluster4  
CFL2 cluster4  
PTCD3 cluster4  
ABHD10 cluster4  
LMAN1 cluster4  
CELF1 cluster4  
NUP93 cluster4  
TMEM106B cluster4  
GPBP1L1 cluster4  
TMEM9B cluster4  
PTP4A2 cluster4  
ZNF830 cluster4  
DDX17 cluster4

UBLCP1 cluster4  
RPAP3 cluster4  
LARP7 cluster4  
NUBP1 cluster4  
GAR1 cluster4  
HNRNPH1 cluster4  
SGOL1 cluster4  
SAFB2 cluster4  
BIRC6 cluster4  
EXOSC7 cluster4  
THYN1 cluster4  
RPN1 cluster4  
MRPL16 cluster4  
AMD1 cluster4  
RTCB cluster4  
REV1 cluster4  
TMEM208 cluster4  
ZNF131 cluster4  
POLR2E cluster4  
SHOC2 cluster4  
ARID1A cluster4  
PWP1 cluster4  
ADNP2 cluster4  
NCOR1 cluster4  
SCML2 cluster4  
KAT6A cluster4  
COPS8 cluster4  
NUP37 cluster4  
TIAL1 cluster4  
FIP1L1 cluster4  
ZNF302 cluster4  
LUC7L2 cluster4  
AZI2 cluster4  
NAA35 cluster4  
DHX15 cluster4  
PUM3 cluster4  
GTPBP4 cluster4  
SEC63 cluster4  
CWF19L2 cluster4  
MINOS1 cluster4  
ILF3-AS1 cluster4  
CDC73 cluster4  
ZNF281 cluster4  
NCK1 cluster4  
LTV1 cluster4  
FAM96B cluster4  
COQ7 cluster4  
TOMM40 cluster4  
HELZ cluster4  
PET100 cluster4  
ARL16 cluster4  
INO80E cluster4  
SCFD1 cluster4  
RBM42 cluster4  
TARDBP cluster4  
ACADM cluster4

CBR4 cluster4  
YLPM1 cluster4  
PCBP1 cluster4  
PPID cluster4  
TDRD12 cluster4  
SKIV2L2 cluster4  
GON4L cluster4  
FNBP4 cluster4  
OARD1 cluster4  
PRPF38B cluster4  
SEC61G cluster4  
SBNO1 cluster4  
RBM46 cluster4  
RPL34 Cluster5  
RPL7 Cluster5  
CWC15 Cluster5  
MAEL Cluster5  
POMP Cluster5  
UQCRB Cluster5  
GLRX5 Cluster5  
CHMP5 Cluster5  
DDX4 Cluster5  
H3F3B Cluster5  
PSMA4 Cluster5  
COX5A Cluster5  
DHX36 Cluster5  
EMC3 Cluster5  
SF3B5 Cluster5  
CACUL1 Cluster5  
NUDT21 Cluster5  
ATG3 Cluster5  
SAP18 Cluster5  
H2AFV Cluster5  
PPFIA1 Cluster5  
SNU13 Cluster5  
HNRNPF Cluster5  
CCT2 Cluster5  
UBXN4 Cluster5  
VPS4B Cluster5  
THOC3 Cluster5  
DNAJB9 Cluster5  
TUBA3D Cluster5  
EIF2S2 Cluster5  
SERBP1 Cluster5  
GLRX3 Cluster5  
SYCE3 Cluster5  
COX6C Cluster5  
VDAC3 Cluster5  
ZRANB2 Cluster5  
BRD8 Cluster5  
SHFM1 Cluster5  
GPN3 Cluster5  
NSRP1 Cluster5  
CCDC59 Cluster5  
HSF2BP Cluster5  
RAD23A Cluster5

SECISBP2 Cluster5  
BTBD10 Cluster5  
EMC7 Cluster5  
HAX1 Cluster5  
TTC1 Cluster5  
KDEL2 Cluster5  
KLHDC2 Cluster5  
PRPF40A Cluster5  
CEBPZOS Cluster5  
SF3B6 Cluster5  
ATRAID Cluster5  
BUD31 Cluster5  
PDCD5 Cluster5  
TUBA3E Cluster5  
DDX5 Cluster5  
CCDC90B Cluster5  
ACTL6A Cluster5  
RSRC2 Cluster5  
SPESP1 Cluster5  
Clorf52 Cluster5  
NDUFB5 Cluster5  
RPS27A Cluster5  
KRBOX1 Cluster5  
PSMD11 Cluster5  
TPRKB Cluster5  
ENY2 Cluster5  
EMC4 Cluster5  
DYNC1I2 Cluster5  
FAM204A Cluster5  
MORF4L1 Cluster5  
ANKLE2 Cluster5  
NAPA Cluster5  
NDUFC2 Cluster5  
MANF Cluster5  
DNAJC2 Cluster5  
PCID2 Cluster5  
HSBP1 Cluster5  
PSMA1 Cluster5  
PDE6D Cluster5  
ZCRB1 Cluster5  
TUBA3C Cluster5  
RPL26L1 Cluster5  
SIMC1 Cluster5  
ATP5L Cluster5  
NDUFA6 Cluster5  
BUB3 Cluster5  
C8orf59 Cluster5  
EXOSC8 Cluster5  
NKIRAS1 Cluster5  
CSNK2B Cluster5  
HIRIP3 Cluster5  
WBP11 Cluster5  
ACER3 Cluster5  
WHSC1 Cluster5  
EMC2 Cluster5  
COX6A1 Cluster5

DYNLT1 Cluster5  
YWHAQ Cluster5  
ING2 Cluster5  
UBE3A Cluster5  
PPP6R2 Cluster5  
FUCA1 Cluster5  
LZIC Cluster5  
CNOT1 Cluster5  
CSNK1A1 Cluster5  
NUP88 Cluster5  
DEGS1 Cluster5  
VPS37A Cluster5  
CBX5 Cluster5  
SEC22C Cluster5  
CCDC171 Cluster5  
NFU1 Cluster5  
ATP6V1D Cluster5  
NDUFC1 Cluster5  
HINT1 Cluster5  
FBXO25 Cluster5  
TMEM170A Cluster5  
PCM1 Cluster5  
LLPH Cluster5  
RAB11A Cluster5  
VDAC2 Cluster5  
ANAPC10 Cluster5  
DSCR8 Cluster5  
SNRPB2 Cluster5  
RPL39L Cluster5  
UBE2Q2 Cluster5  
GPATCH11 Cluster5  
UPF3A Cluster5  
RWDD1 Cluster5  
DDX50 Cluster5  
DPM1 Cluster5  
ATP5F1 Cluster5  
TXNL1 Cluster5  
ATXN2L Cluster5  
CLIC4 Cluster5  
LUC7L Cluster5  
COPS3 Cluster5  
15-Sep Cluster5  
LSM3 Cluster5  
INTS6 Cluster5  
ARF4 Cluster5  
ATP6V0D1 Cluster5  
CPSF3 Cluster5  
SUPT20H Cluster5  
ZNF200 Cluster5  
EWSR1 Cluster5  
CYCS Cluster5  
PSMD7 Cluster5  
RANBP1 Cluster5  
IFT20 Cluster5  
RPA3 Cluster5  
TM9SF2 Cluster5

GTF2H5 Cluster5  
SAMD8 Cluster5  
SPRYD7 Cluster5  
XRN2 Cluster5  
PCNA Cluster5  
SSBP1 Cluster5  
TOX4 Cluster5  
ANKRD11 Cluster5  
KTN1 Cluster5  
GSPT1 Cluster5  
C2orf69 Cluster5  
COX7C Cluster5  
COX11 Cluster5  
MRPL33 Cluster5  
PPP6C Cluster5  
CHURC1 Cluster5  
PSMB1 Cluster5  
SAAL1 Cluster5  
C5orf15 Cluster5  
IMMT Cluster5  
2-Sep Cluster5  
TMEM5 Cluster5  
ELF2 Cluster5  
EXOSC9 Cluster5  
MTCH2 Cluster5  
PLPP5 Cluster5  
KHSRP Cluster5  
UAP1 Cluster5  
FAM122A Cluster5  
EFCAB7 Cluster5  
C11orf73 Cluster5  
STK17A Cluster5  
UBE2L3 Cluster5  
IP6K2 Cluster5  
DAD1 Cluster5  
R3HCC1L Cluster5  
UQCRFS1 Cluster5  
GAPVD1 Cluster5  
MYEOV2 Cluster5  
NDUFAB1 Cluster5  
DDX10 Cluster5  
C11orf70 Cluster5  
CTNNBIP1 Cluster5  
RAB30-AS1 Cluster5  
ITGB3BP Cluster5  
EXOSC3 Cluster5  
C12orf29 Cluster5  
MRPS11 Cluster5  
NSMCE2 Cluster5  
TM2D2 Cluster5  
CHCHD7 Cluster5  
MICU2 Cluster5  
KIF23 Cluster5  
ZNF7 Cluster5  
SLC30A1 Cluster5  
OOEP Cluster5

MMADHC Cluster5  
MRPS16 Cluster5  
GLCCI1 Cluster5  
TMEM230 Cluster5  
MTERF4 Cluster5  
UGP2 Cluster5  
USP42 Cluster5  
SURF4 Cluster5  
RANBP3 Cluster5  
ATG4C Cluster5  
PDHB Cluster5  
WASH1 Cluster5  
CRBN Cluster5  
NDUFB3 Cluster5  
SYNCRIP Cluster5  
UBE2V2 Cluster5  
PDHX Cluster5  
CEP135 Cluster5  
MAPK1 Cluster5  
PAPOLA Cluster5  
TIMM23 Cluster5  
SRI Cluster5  
REEP5 Cluster5  
ZNF143 Cluster5  
COA5 Cluster5  
PSMD14 Cluster5  
TRMT13 Cluster5  
NUDCD1 Cluster5  
ODF2L Cluster5  
GTF3C6 Cluster5  
SSR3 Cluster5  
TRMT10C Cluster5  
THOC1 Cluster5  
SDHA Cluster5  
GFPT1 Cluster5  
BNIP3L Cluster5  
UBE2S Cluster5  
ORC3 Cluster5  
HSPA4 Cluster5  
CLUAP1 Cluster5  
FARSB Cluster5  
TRIM28 Cluster5  
GOSR1 Cluster5  
SEC22A Cluster5  
NR2C1 Cluster5  
SRP19 Cluster5  
SLC25A33 Cluster5  
ZC2HC1A Cluster5  
NTPCR Cluster5  
NDUFB1 Cluster5  
ORC2 Cluster5  
TRIM37 Cluster5  
NOP58 Cluster5  
MRPL52 Cluster5  
ZNHIT3 Cluster5  
TSN Cluster5



GGNBP2 Cluster5  
AKIP1 Cluster5  
COPS2 Cluster5  
ARF1 Cluster5  
UFM1 Cluster5  
MRPL3 Cluster5  
RAE1 Cluster5  
CCT5 Cluster5  
QRICH1 Cluster5  
PSMD2 Cluster5  
TRAM1 Cluster5  
DNTTIP1 Cluster5  
ORMDL2 Cluster5  
TCP1 Cluster5  
PSMA3-AS1 Cluster5  
DNAJC3 Cluster5  
EIF6 Cluster5  
RRAGA Cluster5  
NUDCD2 Cluster5  
PRELID3B Cluster5  
TRIP12 Cluster5  
GLT8D1 Cluster5  
MLH1 Cluster5  
TMEM263 Cluster5  
SCAMP1 Cluster5  
MRPS33 Cluster5  
PAICS Cluster5  
HADHB Cluster5  
ARMC1 Cluster5  
PPP1R2 Cluster5  
PTPRN2 Cluster5  
RFK Cluster5  
TRMT1L Cluster5  
RPAIN Cluster5  
SUGT1 Cluster5  
ABI2 Cluster5  
POLI Cluster5  
UBE2D2 Cluster5  
ZC3H18 Cluster5  
PAIP1 Cluster5  
PSMB3 Cluster5  
UTP18 Cluster5  
DNTTIP2 Cluster5  
NDUFA5 Cluster5  
PGM3 Cluster5  
SVBP Cluster5  
RSRC1 Cluster5  
INTS8 Cluster5  
EPRS Cluster5  
KIF3A Cluster5  
PFDN4 Cluster5  
CNPY3 Cluster5  
CEP55 Cluster5  
TSSC4 Cluster5  
ACBD6 Cluster5  
DERL1 Cluster5

EZH2 Cluster5  
DNAJC10 Cluster5  
MRPS22 Cluster5  
UBE2J2 Cluster5  
DR1 Cluster5  
AHS1 Cluster5  
ELAVL1 Cluster5  
ZFAND6 Cluster5  
ACSL3 Cluster5  
ANAPC16 Cluster5  
DNAJC21 Cluster5  
ERLEC1 Cluster5  
PMPCB Cluster5  
EMC6 Cluster5  
TRAPPC3 Cluster5  
ZC3H11A Cluster5  
RIOK1 Cluster5  
MED21 Cluster5  
IFT43 Cluster5  
SMC6 Cluster5  
PABPC1 Cluster5  
NDUFA8 Cluster5  
KPNA2 Cluster5  
PA2G4 Cluster5  
MRPL51 Cluster5  
SLIRP Cluster5  
RPL36AL Cluster5  
SNRPC Cluster5  
CENPW Cluster5  
DNAJA1 Cluster5  
CIR1 Cluster5  
MRPL14 Cluster5  
ESD Cluster5  
LZTFL1 Cluster5  
PSMG2 Cluster5  
CEBPZ Cluster5  
DNAJC15 Cluster5  
IK Cluster5  
SYPL1 Cluster5  
SERF2 Cluster5  
CCT7 Cluster5  
METTL23 Cluster5  
RTN4 Cluster5  
RAB2A Cluster5  
CDC20 Cluster5  
USP8 Cluster5  
C14orf166 Cluster5  
DCAF7 Cluster5  
CCDC181 Cluster5  
DERL2 Cluster5  
MRPL43 Cluster5  
ATP5B Cluster5  
RPS7 Cluster5  
CCT4 Cluster5  
PSMB6 Cluster5  
SDHB Cluster5

KRTCAP2 Cluster5  
NSA2 Cluster5  
KRT10 Cluster5  
CENPF Cluster5  
PSMB7 Cluster5  
SNRPA1 Cluster5  
UCHL3 Cluster5  
UFSP2 Cluster5  
PEX13 Cluster5  
NOL7 Cluster5  
RER1 Cluster5  
COMMD8 Cluster5  
RPL5 Cluster5  
HNRNPLL Cluster5  
NPHP1 Cluster5  
CCDC34 Cluster5  
TFIP11 Cluster5  
WDR5 Cluster5  
SETD3 Cluster5  
CDK7 Cluster5  
LRRC59 Cluster5  
CCNB1 Cluster5  
RPL23A Cluster5  
TCEB1 Cluster5  
CD59 Cluster5  
RP11-390E23.6 Cluster5  
RPL35A Cluster5  
SLU7 Cluster5  
MRPS9 Cluster5  
CGRRF1 Cluster5  
MIEN1 Cluster5  
NDUFS6 Cluster5  
HAGH Cluster5  
RPF2 Cluster5  
EIF3E Cluster5  
SF3B2 Cluster5  
CARD19 Cluster5  
CEP19 Cluster5  
RPS15A Cluster5  
ARL14EP Cluster5  
CFAP97 Cluster5  
RPS20 Cluster5  
PHTF1 Cluster5  
RPL24 Cluster5  
NDUFAF2 Cluster5  
ATP5J Cluster5  
TTC26 Cluster5  
TTK Cluster5  
SNX3 Cluster5  
PPHLN1 Cluster5  
MAF1 Cluster5  
GMNN Cluster5  
NAA30 Cluster5  
COPS4 Cluster5  
ERO1B Cluster5  
CDK5RAP3 Cluster5

ZNF839 Cluster5  
NME7 Cluster5  
MRPL46 Cluster5  
BTF3 Cluster5  
MRPL22 Cluster5  
TBRG1 Cluster5  
CSTF1 Cluster5  
OXSM Cluster5  
PSMC2 Cluster5  
NDUFAF1 Cluster5  
KIAA1524 Cluster5  
UBE2K Cluster5  
GPATCH2 Cluster5  
BTF3L4 Cluster5  
APITD1 Cluster5  
CHCHD1 Cluster5  
ZNF473 Cluster5  
RPF1 Cluster5  
SETD4 Cluster5  
MRPS18C Cluster5  
PPIL3 Cluster5  
PSMC3 Cluster5  
SPAG9 Cluster5  
TTI2 Cluster5  
ELP4 Cluster5  
PKNOX1 Cluster5  
TOMM7 Cluster5  
PHF20L1 Cluster5  
GAA Cluster5  
MRPL54 Cluster5  
CHCHD6 Cluster5  
DHRS7B Cluster5  
RPS25 Cluster5  
PANK2 Cluster5  
TRAPPC2L Cluster5  
C20orf96 Cluster5  
MRPS31 Cluster5  
EFCAB14 Cluster5  
SSSCA1 Cluster5  
PSMD6 Cluster5  
SF3B4 Cluster5  
NACA Cluster5  
NFE2L2 Cluster5  
RNF126 Cluster5  
TFG Cluster5  
GTPBP8 Cluster5  
DRC3 Cluster5  
VPS28 Cluster5  
FASTKD2 Cluster5  
TACC3 Cluster5  
RARS2 Cluster5  
FKBP4 Cluster5  
ITGAE Cluster5  
JKAMP Cluster5  
CLDND1 Cluster5  
EIF3H Cluster5

HES6 Cluster5  
CDR2 Cluster5  
CSRP2 Cluster5  
PSEN1 Cluster5  
IFT52 Cluster5  
YAE1D1 Cluster5  
EIF3D Cluster5  
CREBL2 Cluster5  
RSL24D1 Cluster5  
SUCLG1 Cluster5  
UHRF1BP1L Cluster5  
DPY30 Cluster5  
TBCC Cluster5  
TXNDC9 Cluster5  
LINC00493 Cluster5  
DDX39A Cluster5  
PSTK Cluster5  
AGGF1 Cluster5  
STYX Cluster5  
LYRM2 Cluster5  
PPM1D Cluster5  
EIF3M Cluster5  
SPSB2 Cluster5  
CEP83 Cluster5  
CNOT2 Cluster5  
DESI2 Cluster5  
OSBPL2 Cluster5  
CLIC1 Cluster5  
CEP63 Cluster5  
FAM162A Cluster5  
CDCA2 Cluster5  
IQCK Cluster5  
ATP5J2 Cluster5  
ARPC2 Cluster5  
RPL30 Cluster5  
TMEM183A Cluster5  
EXTL2 Cluster5  
NDUFS7 Cluster5  
RANBP9 Cluster5  
MRPL2 Cluster5  
VPS8 Cluster5  
FAM160A2 Cluster5  
DHX30 Cluster5  
PNMA1 Cluster5  
ERLIN1 Cluster5  
C12orf76 Cluster5  
LYPLAL1 Cluster5  
HMG3 Cluster5  
PLRG1 Cluster5  
COA4 Cluster5  
CCDC174 Cluster5  
ATP6V1B2 Cluster5  
DHX16 Cluster5  
EXOC1 Cluster5  
PNRC1 Cluster5  
ZNF277 Cluster5

CTB-50L17.10 Cluster5  
HAUS2 Cluster5  
WAC-AS1 Cluster5  
CSDE1 Cluster5  
NDUFS3 Cluster5  
DYNC1LI2 Cluster5  
PSMB5 Cluster5  
NDUFA12 Cluster5  
MYNN Cluster5  
LEPROTL1 Cluster5  
RMDN1 Cluster5  
CWC25 Cluster5  
RPP30 Cluster5  
POLR3F Cluster5  
EBNA1BP2 Cluster5  
ALDH9A1 Cluster5  
UTP11L Cluster5  
MRPS14 Cluster5  
GOLGA8B Cluster5  
TMEM126A Cluster5  
ATF7IP Cluster5  
PRRC2A Cluster5  
AC006277.2 Cluster5  
TBRG4 Cluster5  
CCDC130 Cluster5  
RFC1 Cluster5  
TRIOBP Cluster5  
UBE2Q2L Cluster5  
CNOT10 Cluster5  
MRPL17 Cluster5  
TEX9 Cluster5  
MRPS36 Cluster5  
CCDC117 Cluster5  
GTF2H1 Cluster5  
PLEKHB2 Cluster5  
WDR61 Cluster5  
MCPH1 Cluster5  
IMMP1L Cluster5  
REXO2 Cluster5  
CEBPG Cluster5  
TMEM70 Cluster5  
TIMM17A Cluster5  
CHMP2A Cluster5  
NDUFA2 Cluster5  
C14orf119 Cluster5  
SSNA1 Cluster5  
DPH3 Cluster5  
MCM4 Cluster5  
AP2A2 Cluster5  
CACYBP Cluster5  
TNPO1 Cluster5  
ATP5H Cluster5  
MRPL21 Cluster5  
EIF2B2 Cluster5  
AHI1 Cluster5  
SF1 Cluster5

RNF10 Cluster5  
C2orf49 Cluster5  
SUPT4H1 Cluster5  
KIF2A Cluster5  
HIGD2A Cluster5  
NDUFV2 Cluster5  
PIGF Cluster5  
STX18 Cluster5  
USP5 Cluster5  
PEBP1 Cluster5  
RTFDC1 Cluster5  
BCAS2 Cluster5  
NCBP2 Cluster5  
ASH2L Cluster5  
PRKRIP1 Cluster5  
MTDH Cluster5  
KARS Cluster5  
RNF149 Cluster5  
TMEM248 Cluster5  
EIF4G3 Cluster5  
STT3B Cluster5  
RPL23 Cluster5  
RNH1 Cluster5  
RPS14 Cluster5  
DCAF13 Cluster5  
ECH1 Cluster5  
CRIPT Cluster5  
MAP9 Cluster5  
GNL2 Cluster5  
POLD3 Cluster5  
HSPH1 Cluster5  
DIDO1 Cluster5  
C2orf76 Cluster5  
ASB1 Cluster5  
ACIN1 Cluster5  
NDUFA7 Cluster5  
SRPRB Cluster5  
RYBP Cluster5  
CCDC25 Cluster5  
WDR18 Cluster5  
NMT1 Cluster5  
RNGTT Cluster5  
MARS Cluster5  
HSDL1 Cluster5  
PNPLA2 Cluster5  
POLR3GL Cluster5  
GOLGA8A Cluster5  
MALSU1 Cluster5  
ADSS Cluster5  
ZBTB80S Cluster5  
DAP3 Cluster5  
HBS1L Cluster5  
SMU1 Cluster5  
DNAJA3 Cluster5  
POLR2M Cluster5  
C6orf62 Cluster5

NUDT9 Cluster5  
SART3 Cluster5  
ZNF24 Cluster5  
TTC17 Cluster5  
HARS Cluster5  
ZNHIT1 Cluster5  
DDX27 Cluster5  
NEK3 Cluster5  
C11orf57 Cluster5  
KIAA1328 Cluster5  
UBE2A Cluster5  
KRCC1 Cluster5  
CCNL1 Cluster5  
FLII Cluster5  
CDK5RAP2 Cluster5  
PCNXL4 Cluster5  
WAC Cluster5  
SARS Cluster5  
PIAS1 Cluster5  
NEK1 Cluster5  
RPL9 Cluster5  
KAT5 Cluster5  
NR1H2 Cluster5  
UQCRC2 Cluster5  
RUBCN Cluster5  
CSNK2A1 Cluster5  
SAV1 Cluster5  
ECHDC1 Cluster5  
SNRNP35 Cluster5  
PDCD11 Cluster5  
PLAA Cluster5  
MRPL9 Cluster5  
FAM222B Cluster5  
GPR137 cluster6  
BCAP29 cluster6  
PHF1 cluster6  
CCDC88A cluster6  
HSPA2 cluster6  
CETN3 cluster6  
RP11-620J15.3 cluster6  
IFT88 cluster6  
C15orf48 cluster6  
UNC50 cluster6  
CUTC cluster6  
SGOL2 cluster6  
CNTD1 cluster6  
C15orf43 cluster6  
EID3 cluster6  
SSR2 cluster6  
SPATA22 cluster6  
SUGP2 cluster6  
CKLF cluster6  
AC240274.1 cluster6  
METTL10 cluster6  
BOLL cluster6  
NUF2 cluster6



PEX3 cluster6  
LMNA cluster6  
CCDC36 cluster6  
ART3 cluster6  
AC159540.1 cluster6  
CEP57L1 cluster6  
LACTB cluster6  
DHFR cluster6  
CCDC14 cluster6  
THOC7 cluster6  
DEPDC1B cluster6  
PLPP1 cluster6  
SPDYA cluster6  
TXNRD3 cluster6  
RSBN1 cluster6  
NCAPH cluster6  
ANKRD36C cluster6  
C4orf32 cluster6  
CATSPER2 cluster6  
GULP1 cluster6  
FAM216A cluster6  
WIPI2 cluster6  
RAD17 cluster6  
ANKRD36 cluster6  
DEPDC1 cluster6  
LRRC49 cluster6  
AK9 cluster6  
ANKRD62 cluster6  
MPP6 cluster6  
MGAT2 cluster6  
SOS2 cluster6  
BUD13 cluster6  
SNAPC1 cluster6  
TNPO3 cluster6  
PYURF cluster6  
PFDN6 cluster6  
TOPBP1 cluster6  
PCSK7 cluster6  
XRRA1 cluster6  
TCEB3 cluster6  
KDM5B cluster6  
RDH14 cluster6  
AHCTF1 cluster6  
RWDD2B cluster6  
MKKS cluster6  
ALG8 cluster6  
TBC1D12 cluster6  
EAPP cluster6  
FKBP6 cluster6  
ACD cluster6  
HLA-A cluster6  
FAM107B cluster6  
CDK1 cluster6  
WDR70 cluster6  
MLLT10 cluster6  
SLC4A7 cluster6

CCNO cluster6  
RNFT1 cluster6  
KIAA1109 cluster6  
ANKRD36B cluster6  
ZNF544 cluster6  
CDCA3 cluster6  
FAM207A cluster6  
CYB5D2 cluster6  
ATRNL1 cluster6  
GGA1 cluster6  
GOLGA1 cluster6  
IMPA1 cluster6  
BIRC5 cluster6  
NSMCE3 cluster6  
CENPT cluster6  
GTSE1 cluster6  
AK2 cluster6  
PDRG1 cluster6  
TANK cluster6  
MBD1 cluster6  
MYO9A cluster6  
DYNC2H1 cluster6  
C10orf67 cluster6  
NEK4 cluster6  
WRB cluster6  
EIF5A cluster6  
SNX14 cluster6  
C21orf59 cluster6  
IFT74 cluster6  
GLB1L cluster6  
KCTD19 cluster6  
ARV1 cluster6  
PLA2G16 cluster6  
PENK cluster6  
NEK2 cluster6  
WDR87 cluster6  
IFT27 cluster6  
OVOS2 cluster6  
RBMXL2 cluster6  
SFMBT1 cluster6  
PIWIL1 cluster6  
TCFL5 cluster6  
COX6B2 cluster6  
FAM174A cluster6  
ADAD2 cluster6  
TBP cluster6  
USP32 cluster6  
TXNDC12 cluster6  
ZNF793-AS1 cluster6  
TCF25 cluster6  
TCEA2 cluster6  
TYMS cluster6  
POP4 cluster6  
SMPT1 cluster6  
STK33 cluster6  
LRRC23 cluster6

ENO1-AS1 cluster6  
DNAJC27 cluster6  
REEP4 cluster6  
CHAC2 cluster6  
ARL3 cluster6  
TMEM261 cluster6  
PAF1 cluster6  
NBPF14 cluster6  
RP13-942N8.1 cluster6  
TIMM9 cluster6  
PMM1 cluster6  
BTBD1 cluster6  
NT5C3B cluster6  
TBK1 cluster6  
CYLD cluster6  
FAM184A cluster6  
SAC3D1 cluster6  
PFKM cluster6  
ANAPC11 cluster6  
TOE1 cluster6  
PLIN3 cluster6  
AC005076.5 cluster6  
FAM134A cluster6  
RP11-293A21.1 cluster6  
UBR5 cluster6  
FAAH cluster6  
WDR54 cluster6  
CEP104 cluster6  
AQP11 cluster6  
EFCAB2 cluster6  
MTL5 cluster6  
MRPL28 cluster6  
C9orf43 cluster6  
3-Mar cluster6  
PINK1 cluster6  
SNHG8 cluster6  
WDR66 cluster6  
DNAJC5G cluster6  
EIF5AL1 cluster6  
CCHCR1 cluster6  
ZBED5-AS1 cluster6  
DNAJB2 cluster6  
CD320 cluster6  
CCDC112 cluster6  
COMMD4 cluster6  
EIF3K cluster6  
ATP5G1 cluster6  
SETX cluster6  
TP53I13 cluster6  
ZBTB44 cluster6  
ARL6IP1 cluster6  
CGGBP1 cluster6  
WDR48 cluster6  
TTC14 cluster6  
C4orf3 cluster6  
EFR3A cluster6

POLR2D cluster6  
DYX1C1 cluster6  
HDDC2 cluster6  
CCDC24 cluster6  
EEF1E1 cluster6  
FAM221A cluster6  
PIH1D1 cluster6  
PAAF1 cluster6  
MDM1 cluster6  
CUEDC2 cluster6  
CEP126 cluster6  
C2orf68 cluster6  
FAM118B cluster6  
MBTD1 cluster6  
PTTG1IP cluster6  
CDCA5 cluster6  
TIMM10 cluster6  
TDRG1 cluster6  
RP11-390F4.3 cluster6  
TMEM99 cluster6  
SLC25A31 cluster6  
LINC01206 cluster6  
STMN1 cluster6  
SLTM cluster6  
LDHAL6B cluster6  
LINC01120 cluster6  
LINC00668 cluster6  
BUB1 cluster6  
RFX4 cluster6  
ANKRD30BL cluster6  
STK31 cluster6  
ZWILCH cluster6  
STRBP cluster6  
LINC00865 cluster6  
PPP1R35 cluster6  
EP400NL cluster6  
CTC-338M12.5 cluster6  
SLC4A8 cluster6  
MLH3 cluster6  
HOXB-AS1 cluster6  
DDIT3 cluster6  
CTD-2015H6.3 cluster6  
FBXO43 cluster6  
AC005082.12 cluster6  
SLC2A14 cluster6  
C3orf62 cluster6  
KB-1592A4.15 cluster6  
ANKRD30A cluster6  
TDRD10 cluster6  
RP13-735L24.1 cluster6  
ACYP1 cluster6  
DAZAP1 cluster6  
LINC00837 cluster6  
ZSCAN16-AS1 cluster6  
LINC01481.1 cluster6  
C12orf40 cluster6

RNF17 cluster6  
FAM225A cluster6  
TCP10 cluster6  
PILRB cluster6  
C4orf46 cluster6  
IFT122 cluster6  
FAM225B cluster6  
CTD-2036P10.3 cluster6  
CTC-523E23.1 cluster6  
TEX14 cluster6  
RP11-403N16.3 cluster6  
MYADM cluster6  
CNTROB cluster6  
LINC00930 cluster6  
PLK2 cluster6  
IL23A cluster6  
CFAP46 cluster6  
RP3-468B3.2 cluster6  
TCP10L2 cluster6  
RP11-482D24.2 cluster6  
SMURF1 cluster6  
COL20A1 cluster6  
CCDC191 cluster6  
IL5 cluster6  
PAN2 cluster6  
RP11-844P9.2 cluster6  
WDR35 cluster6  
LINC01015 cluster6  
SPRTN cluster6  
ZNF546 cluster6  
NEU3 cluster6  
ANKRD18A cluster6  
POTEC cluster6  
TSTD1 cluster6  
PTAR1 cluster6  
PRNP cluster6  
ENTHD1 cluster6  
TDRD15 cluster6  
RASSF1 cluster6  
RP11-219A15.1 cluster6  
RALGPS2 cluster6  
IQCH-AS1 cluster6  
DIXDC1 cluster6  
RPGRIP1L cluster6  
MAGEF1 cluster6  
RP11-325N19.3 cluster6  
KAT7 cluster6  
ENKD1 cluster6  
LINC00657 cluster6  
WDR62 cluster6  
PLD6 cluster6  
BCKDK cluster6  
PMS2 cluster6  
C9orf40 cluster6  
FAM214A cluster6  
POLG2 cluster6

SGK1 cluster6  
ZNF609 cluster6  
CTD-2270L9.4 cluster6  
AC023491.2 cluster6  
RP11-363J20.1 cluster6  
RFESD cluster6  
HYLS1 cluster6  
ANKRD20A4 cluster6  
FAM95B1 cluster6  
INSIG2 cluster6  
LINC01006 cluster6  
AC002117.1 cluster6  
C1GALT1C1L cluster6  
LCORL cluster6  
ARMT1 cluster6  
LINC00342 cluster6  
AC008088.4 cluster6  
HOXB-AS3 cluster6  
LINC00964 cluster6  
EXD2 cluster6  
SCYL1 cluster6  
RABAC1 cluster6  
LEO1 cluster6  
VPS13B cluster6  
FLOT1 cluster6  
RP11-181C3.1 cluster6  
ST13 cluster6  
ARHGAP33 cluster6  
SEC61A2 cluster6  
PRKAB1 cluster6  
CEP44 cluster6  
CARF cluster6  
TNRC6C cluster6  
TMEM67 cluster6  
MKL2 cluster6  
KDM4B cluster6  
SPEF1 cluster6  
MTFR2 cluster6  
MRPL19 cluster6  
KDM7A cluster6  
CCDC144NL cluster6  
HECTD4 cluster6  
ZCCHC14 cluster6  
SAMD13 cluster6  
DAP cluster6  
MIB1 cluster6  
U2AF1L4 cluster6  
ELP6 cluster6  
PPP1R9A cluster6  
FAM206A cluster6  
BRD1 cluster6  
RP11-152N13.5 cluster6  
ANKRD20A3 cluster6  
PPM1K cluster6  
TK2 cluster6  
RNF103 cluster6

RP11-714M23.2 cluster6  
MYLIP cluster6  
RNF6 cluster6  
MTMR6 cluster6  
FAM179B cluster6  
DMTF1 cluster6  
THOP1 cluster6  
MSRB1 cluster6  
FAM135A cluster6  
PIGV cluster6  
TEX261 cluster6  
SEPSECS-AS1 cluster6  
ARL6 cluster6  
KANSLL1L cluster6  
CNOT11 cluster6  
LINC00116 cluster6  
AP4S1 cluster6  
SHE cluster6  
ATP8B3 cluster6  
ELOVL2 cluster6  
CAAP1 cluster6  
NISCH cluster6  
FOXD3-AS1 cluster6  
POMT1 cluster6  
RSPH1 cluster6  
ARL13B cluster6  
ACBD5 cluster6  
PNPT1 cluster6  
WDR19 cluster6  
TDRD5 cluster6  
SYNGR1 cluster6  
BAD cluster6  
NFS1 cluster6  
ZNF608 cluster6  
CEP295 cluster6  
CCNYL1 cluster6  
ZNF76 cluster6  
RP5-107303.2 cluster6  
CSRNP2 cluster6  
SNAPC3 cluster6  
ULK2 cluster6  
CPSF1 cluster6  
AC009133.12 cluster6  
TOMM70A cluster6  
FBXO3 cluster6  
PRR19 cluster6  
ERBB2IP cluster6  
FBXO15 cluster6  
TKFC cluster6  
CRY2 cluster6  
ANKRD18B cluster6  
LINC01606 cluster6  
WWC2 cluster6  
MCAT cluster6  
PEX7 cluster6  
RING1 cluster6

IFT80 cluster6  
FAM217B cluster6  
PIGBOS1 cluster6  
EBPL cluster6  
DCTN2 cluster6  
DCAF16 cluster6  
JMJD6 cluster6  
PPP1R10 cluster6  
KPNA4 cluster6  
DUSP28 cluster6  
CALCOCO1 cluster6  
DHRS11 cluster6  
EIF2B3 cluster6  
LENG8 cluster6  
TDRD3 cluster6  
YY1AP1 cluster6  
RALGPS1 cluster6  
SYNRG cluster6  
HMG20B cluster6  
DPP8 cluster6  
RASSF8-AS1 cluster6  
ACTR1A cluster6  
EFEMP2 cluster6  
BRE cluster6  
FBRS cluster6  
FAAP20 cluster6  
HACL1 cluster6  
SERINC3 cluster6  
AKR7A2 cluster6  
AP1M1 cluster6  
TLK2 cluster6  
OXR1 cluster6  
FAM118A cluster6  
GNL1 cluster6  
HSPBP1 cluster6  
NPEPPS cluster6  
NUTM2A-AS1 cluster6  
MRGBP cluster7  
Clorf61 cluster7  
RPL7A cluster7  
RPL31 cluster7  
PPP1CC cluster7  
PFKP cluster7  
EEF2 cluster7  
MFI2-AS1 cluster7  
PSMC1 cluster7  
ITFG1-AS1 cluster7  
PLEKHO1 cluster7  
YBX1 cluster7  
COX7A2 cluster7  
SPATA4 cluster7  
DBI cluster7  
YBX3 cluster7  
RNF114 cluster7  
GK2 cluster7  
AC005754.7 cluster7



12-Sep cluster7  
ANKRD7 cluster7  
HRASLS cluster7  
RGMB-AS1 cluster7  
PFN4 cluster7  
ATPIF1 cluster7  
BRDT cluster7  
CETN1 cluster7  
TMIGD3 cluster7  
CH17-140K24.2 cluster7  
RP11-1223D19.1 cluster7  
NDUFB4 cluster7  
CT62 cluster7  
REEP3 cluster7  
LRWD1 cluster7  
ACAT1 cluster7  
APH1B cluster7  
GKAP1 cluster7  
RPL10L cluster7  
TRIM69 cluster7  
CH17-140K24.7 cluster7  
SPATA17 cluster7  
EFCAB10 cluster7  
C7orf62 cluster7  
TTC25 cluster7  
ACR cluster7  
PDHA2 cluster7  
PIH1D2 cluster7  
LCA5L cluster7  
C1orf56 cluster7  
AHRR cluster7  
NACA2 cluster7  
ANKRD55 cluster7  
XRCC6BP1 cluster7  
MFSD6L cluster7  
C6orf99 cluster7  
CCDC74B cluster7  
H3F3C cluster7  
WDR53 cluster7  
RPGRIP1 cluster7  
CCDC74A cluster7  
TRIM13 cluster7  
RNF181 cluster7  
SCCPDH cluster7  
LARP6 cluster7  
DDX19B cluster7  
RSPH9 cluster7  
CFAP206 cluster7  
ADAM32 cluster7  
ALS2CR11 cluster7  
TP53RK cluster7  
NME5 cluster7  
CFAP53 cluster7  
OSCP1 cluster7  
C8orf88 cluster7  
CHKA cluster7

PPP2R3C cluster7  
HSF1 cluster7  
KLHDC9 cluster7  
MTIF3 cluster7  
MTO1 cluster7  
TSGA10 cluster7  
HCFC2 cluster7  
PPP2R1B cluster7  
AMN1 cluster7  
IQUB cluster7  
AC062017.1 cluster7  
SHCBP1L cluster7  
KIF9 cluster7  
RBAKDN cluster7  
NRIP3 cluster7  
ZPBP cluster7  
CCDC173 cluster7  
KHDRBS3 cluster7  
BAZ2B cluster7  
MRPL36 cluster7  
CAPRIN1 cluster7  
C1orf94 cluster7  
KATNAL1 cluster7  
DUS2 cluster7  
FGFR1OP cluster7  
PRKAR1A cluster7  
MED7 cluster7  
WDR60 cluster7  
CDC25C cluster7  
ZPBP2 cluster7  
WARS cluster7  
RP5-1023B21.1 cluster7  
LDHC cluster7  
CCDC110 cluster7  
PTTG1 cluster7  
C7orf55 cluster7  
MCHR2-AS1 cluster7  
TBPL1 cluster7  
MNS1 cluster7  
PSMG1 cluster7  
LINC01016 cluster7  
CCT6B cluster7  
DBF4 cluster7  
PPP3R2 cluster7  
CCNB2 cluster7  
NKAPL cluster7  
AC004381.6 cluster7  
PRKCDBP cluster7  
GLIPR1L1 cluster7  
GS1-259H13.2 cluster7  
CCDC146 cluster7  
PBK cluster7  
NAA20 cluster7  
SPINK2 cluster7  
LYRM5 cluster7  
GTF2A2 cluster7

SPAG6 cluster7  
DYDC1 cluster7  
SPATA16 cluster7  
CCNA1 cluster7  
CCDC62 cluster7  
COX7B2 cluster7  
MRPL47 cluster7  
CCNH cluster7  
RP5-942I16.1 cluster7  
GLIPR1L2 cluster7  
DDX25 cluster7  
C6orf48 cluster7  
SH3GLB1 cluster7  
GOT1 cluster7  
TCTE3 cluster7  
YBEY cluster7  
DYRK3 cluster7  
PABPC3 cluster7  
RP4-665J23.1 cluster7  
OBSL1 cluster7  
HN1 cluster7  
DRG1 cluster7  
GALNT3 cluster7  
NUDT4 cluster7  
CHST13 cluster7  
CCDC65 cluster7  
DNAL1 cluster7  
MKRN1 cluster7  
ZC2HC1C cluster7  
MDH1B cluster7  
LRRC34 cluster7  
LYAR cluster7  
SLCO6A1 cluster7  
ZMYND10 cluster7  
LRRC6 cluster7  
ZNF846 cluster7  
CCDC83 cluster7  
C1orf158 cluster7  
TMBIM4 cluster7  
NUB1 cluster7  
C16orf86 cluster7  
LACTB2 cluster7  
C15orf61 cluster7  
COPRS cluster7  
LRRIQ3 cluster7  
INO80C cluster7  
C14orf1 cluster7  
CCDC42 cluster7  
MRPL42 cluster7  
RP11-705C15.4 cluster7  
RIBC2 cluster7  
LINC01210 cluster7  
RP6-91H8.2 cluster7  
CLGN cluster7  
CHST1 cluster7  
NDUFAF3 cluster7

KPNA5 cluster7  
ADAM30 cluster7  
GYG1 cluster7  
ASRGL1 cluster7  
BBOF1 cluster7  
ATP6V1F cluster7  
PPP3CC cluster7  
MPST cluster7  
RGCC cluster7  
C4orf22 cluster7  
NDUFAF7 cluster7  
TMEM225 cluster7  
PSMD4 cluster7  
ISOC2 cluster7  
LRR1 cluster7  
SLC9B1 cluster7  
CD47 cluster7  
BBIP1 cluster7  
PLK1 cluster7  
RP11-231D20.2 cluster7  
C9orf135-AS1 cluster7  
CRNDE cluster7  
BBS12 cluster7  
AURKC cluster7  
LRRC46 cluster7  
ZMYND12 cluster7  
BAG2 cluster7  
LNP1 cluster7  
CTC-338M12.2 cluster7  
DECR1 cluster7  
DNAJB1 cluster7  
AC002467.7 cluster7  
KDM4D cluster7  
PIP5K1B cluster7  
PPP1R42 cluster7  
PSENN cluster7  
RP11-80F22.15 cluster7  
RSPH6A cluster7  
SNUPN cluster7  
PRPS1L1 cluster7  
ARHGAP9 cluster7  
TMPRSS12 cluster7  
GMPS cluster7  
C22orf23 cluster7  
LINC01096 cluster7  
C1QTNF9B-AS1 cluster7  
TMEM232 cluster7  
BRAP cluster7  
ARHGAP15 cluster7  
LAP3 cluster7  
ACSL6 cluster7  
CDKL2 cluster7  
C16orf95 cluster7  
DPCD cluster7  
CCDC38 cluster7  
CTD-2538C1.2 cluster7

TOMM20 cluster7  
SLC26A8 cluster7  
PPP1R1C cluster7  
RP13-270P17.1 cluster7  
DNAAF1 cluster7  
LDHA cluster7  
UQCR10 cluster7  
ZCWPW2 cluster7  
ATG4D cluster7  
IL4I1 cluster7  
RUVBL2 cluster7  
AURKA cluster7  
RP11-180O5.2 cluster7  
CARTPT cluster7  
REC114 cluster7  
RTF1 cluster7  
LINC01249 cluster7  
TBL2 cluster7  
ZNF596 cluster7  
AC010127.3 cluster7  
TRIM61 cluster7  
MIR646HG cluster7  
SOX18 cluster7  
FAM228A cluster7  
SMIM19 cluster7  
FAM170A cluster7  
OTUD6B-AS1 cluster7  
CISD1 cluster7  
SPAG1 cluster7  
AC007391.2 cluster7  
KATNAL2 cluster7  
RPS13 cluster7  
TMEM220 cluster7  
ELP5 cluster7  
C10orf107 cluster7  
CTD-3187F8.11 cluster7  
HDGFL1 cluster7  
SLC39A3 cluster7  
LRRCC1 cluster7  
GNPNAT1 cluster7  
ENKUR cluster7  
SLC6A16 cluster7  
SAYS1 cluster7  
MDH2 cluster7  
PALLD cluster7  
TUSC1 cluster7  
LVCAT1 cluster7  
GS1-18A18.2 cluster7  
PSMC4 cluster7  
ACTR6 cluster7  
ZNF233 cluster7  
LINC01568 cluster7  
NAGK cluster7  
EPB41L4A-AS1 cluster7  
PKD2L2 cluster7  
TKTL2 cluster7

TTC30A cluster7  
LINC01486 cluster7  
ANKRD45 cluster7  
DPM3 cluster7  
YIPF2 cluster7  
ALDH1A2 cluster7  
GTSF1 cluster7  
MEIG1 cluster7  
PCDH17 cluster7  
C11orf74 cluster7  
SOX5 cluster7  
RP11-253M7.1 cluster7  
PXYLP1 cluster7  
RNF32 cluster7  
THUMPD3 cluster7  
GOS2 cluster7  
AMDHD2 cluster7  
FAR2 cluster7  
MRPL34 cluster7  
LIN7A cluster7  
RNF113B cluster7  
STAM2 cluster7  
AC022007.5 cluster7  
ADAM18 cluster7  
LETM2 cluster7  
AC003075.4 cluster7  
RNF20 cluster7  
SPATA8 cluster7  
FBXO36 cluster7  
LEKR1 cluster7  
GJA8 cluster7  
RP11-446F17.3 cluster7  
POLR1D cluster7  
AC009948.5 cluster7  
CRYZL1 cluster7  
KRT23 cluster7  
RP11-358H12.1 cluster7  
SOBP cluster7  
SYNJ2BP cluster7  
ADAM2 cluster7  
INAFM2 cluster7  
AC007966.1 cluster7  
HSF5 cluster7  
FDFT1 cluster7  
SLC2A5 cluster7  
PXDNL cluster7  
FAM173A cluster7  
SLC1A5 cluster7  
RWDD2A cluster7  
C17orf80 cluster7  
HOXA7 cluster7  
C1orf101 cluster7  
OVOL1 cluster7  
SLC51B cluster7  
DUS3L cluster7  
PKIG cluster7

ATP50 cluster7  
CCDC39 cluster7  
TYSND1 cluster7  
AIMP2 cluster7  
RP11-973N13.4 cluster7  
RP1-138B7.7 cluster7  
SLCO3A1 cluster7  
PRCP cluster7  
AKAP12 cluster7  
KATNB1 cluster7  
C11orf63 cluster7  
CASC2 cluster7  
C18orf21 cluster7  
RP11-417O18.2 cluster7  
AC026471.6 cluster7  
SPAG8 cluster7  
RP11-524O1.4 cluster7  
LINC01360 cluster7  
B9D1 cluster7  
OXLD1 cluster7  
CTD-2553L13.10 cluster7  
SLC25A2 cluster7  
HSPBAP1 cluster7  
WDR63 cluster7  
TMPO-AS1 cluster7  
LINC01424 cluster7  
DCDC2 cluster7  
CCDC158 cluster7  
IQCD cluster7  
DNAL4 cluster7  
RP11-676F20.4 cluster7  
RP5-828H9.1 cluster7  
ADNP-AS1 cluster7  
CFAP52 cluster7  
GRK4 cluster7  
FAM132B cluster7  
CCDC148 cluster7  
CTA-407F11.8 cluster7  
ZNF821 cluster7  
JHDM1D-AS1 cluster7  
LINC00654 cluster7  
CHCHD5 cluster7  
PDZD9 cluster7  
DRC7 cluster7  
FAM57B cluster7  
MOK cluster7  
YBX2 cluster7  
RP11-245D16.4 cluster7  
UBE2E2-AS1 cluster7  
MALL cluster7  
SPAG16 cluster7  
RP11-389G6.5 cluster7  
RP11-121G22.3 cluster7  
ZBTB32 cluster7  
PIAS2 cluster7  
FLJ35934 cluster7

DNAI2 cluster7  
RP11-517B11.4 cluster7  
C16orf71 cluster7  
TMEM202 cluster7  
AC079354.5 cluster7  
RP11-607P23.1 cluster7  
ODF4 cluster7  
DGCR5 cluster7  
AGBL5 cluster7  
COMMD1 cluster7  
GS1-24F4.2 cluster7  
BLZF1 cluster7  
MORC2-AS1 cluster7  
LYRM7 cluster7  
RP11-148B18.1 cluster7  
ITGB6 cluster7  
OVCH1-AS1 cluster7  
LINC00882 cluster7  
ART5 cluster7  
LRRC37B cluster7  
SLC35E4 cluster7  
HVCN1 cluster7  
TOMM5 cluster7  
RP11-626G11.5 cluster7  
CEP70 cluster7  
CFAP43 cluster7  
WDR88 cluster7  
RP1-90J20.8 cluster7  
FAM72A cluster7  
CAPN11 cluster7  
IAH1 cluster7  
CBARP cluster7  
RP11-760D2.5 cluster7  
RP11-203B9.4 cluster7  
AKAP6 cluster7  
RP11-52L5.6 cluster7  
BORA cluster7  
NUDT16 cluster7  
SLC15A4 cluster7  
ADO cluster7  
KLHDC10 cluster7  
NOL4L cluster7  
STAMBPL1 cluster7  
STARD6 cluster7  
TTC12 cluster7  
TMEM217 cluster7  
SNHG10 cluster7  
BVES-AS1 cluster7  
NME8 cluster7  
C10orf25 cluster7  
B3GALT4 cluster7  
PHYHIPL cluster7  
AC113617.1 cluster7  
LINC00911 cluster7  
HOXA-AS2 cluster7  
ODC1 cluster7



NEFM cluster7  
SOD3 cluster7  
RIIAD1 cluster7  
HIST1H2BC cluster7  
CCDC87 cluster7  
PLA2G6 cluster7  
NUDT6 cluster7  
SPAG5 cluster7  
ATXN7L1 cluster7  
C11orf49 cluster7  
IDE cluster7  
ATG9A cluster7  
KIAA1324 cluster7  
ZNF689 cluster7  
DAW1 cluster7  
DAPK3 cluster7  
PAPOLB cluster7  
APOM cluster7  
RP11-410L14.2 cluster7  
DHRS4 cluster7  
CTC-203F4.2 cluster7  
PCDHB7 cluster7  
NUDCD3 cluster7  
SMIM2-AS1 cluster7  
TRPT1 cluster7  
RFX2 cluster7  
AP2B1 cluster7  
RP11-568N6.1 cluster7  
SRA1 cluster7  
BMPR1B-AS1 cluster7  
DNAH8 cluster7  
KIAA1257 cluster7  
MTERF2 cluster7  
WFDC3 cluster7  
AC093901.1 cluster7  
FAM126A cluster7  
CCDC50 cluster7  
RABGAP1L cluster7  
TRIM24 cluster7  
DNAI1 cluster7  
RP11-235C23.5 cluster7  
SIGLECL1 cluster7  
RORA-AS1 cluster7  
RP1-63G5.8 cluster7  
OVOL2 cluster7  
CAMKMT cluster7  
GOLGA8G cluster7  
SMARCA2 cluster7  
AC009473.1 cluster7  
ZNF667-AS1 cluster7  
RP11-554D20.1 cluster7  
C2orf61 cluster7  
RAB32 cluster7  
RP11-462G2.2 cluster7  
FAM186B cluster7  
HMMR cluster7

PPA2 cluster7  
FTCD cluster7  
TAF9 cluster7  
RP11-295G20.2 cluster7  
RP11-573D15.9 cluster7  
RP11-68L18.1 cluster7  
C15orf39 cluster7  
CINP cluster7  
CPTP cluster7  
RPUSD3 cluster7  
MTRF1 cluster7  
COQ5 cluster7  
SSH2 cluster7  
UBXN10 cluster7  
IGHMBP2 cluster7  
MRGPRG-AS1 cluster7  
RP5-908M14.9 cluster7  
MED26 cluster7  
DACH1 cluster7  
LINC00221 cluster7  
ABHD8 cluster7  
GGPS1 cluster7  
PRKACG cluster7  
LINC00879 cluster7  
CILP2 cluster7  
STYXL1 cluster7  
BIRC8 cluster7  
RP11-758H9.2 cluster7  
GALNT15 cluster7  
TP53I3 cluster7  
LACTB2-AS1 cluster7  
RP4-561L24.3 cluster7  
IL13 cluster7  
CAPNS1 cluster7  
TRAPPC12 cluster7  
SLC25A19 cluster7  
RP11-628E19.2 cluster7  
KLB cluster7  
CTD-3028N15.1 cluster7  
ADRBK2 cluster7  
FAM227B cluster7  
RP11-67L3.4 cluster7  
CCDC170 cluster7  
ERICH1-AS1 cluster7  
RP3-496C20.1 cluster7  
DCAF10 cluster7  
ARMC2 cluster7  
NAPRT cluster7  
RP4-816N1.6 cluster7  
KB-1410C5.2 cluster7  
GEMIN4 cluster7  
RAB13 cluster7  
KRT72 cluster7  
PPP2R5C cluster7  
CCDC86 cluster7  
LINC00305 cluster7

RP11-535A19.2 cluster7  
THTPA cluster7  
RABL3 cluster7  
NMNAT3 cluster7  
MYCNOS cluster7  
CCDC178 cluster7  
TPM4 cluster7  
PITPNA-AS1 cluster7  
ATL1 cluster7  
UBE2U cluster7  
RP11-89K11.1 cluster7  
SLC22A16 cluster7  
LINC01431 cluster7  
RP11-862L9.3 cluster7  
RP11-434E6.2 cluster7  
CLHC1 cluster7  
AC015922.6 cluster7  
DNAH12 cluster7  
CTSF cluster7  
RP11-402J6.1 cluster7  
RAB4A cluster7  
CCDC96 cluster7  
SVIL-AS1 cluster7  
C12orf56 cluster7  
MOBP cluster7  
ESR2 cluster7  
NOSIP cluster7  
ANKRD13A cluster7  
RP11-539L10.3 cluster7  
BTD cluster7  
CTD-2162K18.4 cluster7  
JMJD1C-AS1 cluster7  
MUC12 cluster7  
CCDC92 cluster7  
ZNF385D cluster7  
LINC00662 cluster7  
DDT cluster7  
C2orf81 cluster7  
RP11-697B24.1 cluster7  
HEXIM2 cluster7  
GIT1 cluster7  
SRPK1 cluster7  
TMA16 cluster7  
TTC21A cluster7  
HTATIP2 cluster7  
UBAP1 cluster7  
IFT22 cluster7  
PRADC1 cluster7  
DEF6 cluster7  
ZDHHC12 cluster7  
DUS1L cluster7  
SLC5A2 cluster7  
DCAF5 cluster7  
CFAP221 cluster7  
USP3-AS1 cluster7  
DZIP1 cluster7

SLC25A51 cluster7  
FAM181A cluster7  
SMIM22 cluster7  
SAMD15 cluster7  
CMTM1 cluster7  
IPO4 cluster7  
FEZ1 cluster7  
RP4-613A2.1 cluster7  
DPP10-AS1 cluster7  
MVD cluster7  
SRRT cluster7  
MTRF1L cluster7  
TROAP cluster7  
EFCAB5 cluster7  
EIF3F cluster7  
PTPMT1 cluster7  
LIPT2 cluster7  
ZFP91 cluster7  
SERP1 cluster7  
RHBDD2 cluster7  
ADORA2A-AS1 cluster7  
SCG5 cluster7  
RNMTL1 cluster7  
STK11 cluster7  
SMPD2 cluster7  
PLK4 cluster7  
STK16 cluster7  
CEP83-AS1 cluster7  
CCDC7.1 cluster7  
APITD1-CORT cluster7  
SAXO2 cluster7  
CCDC157 cluster7  
ZNF675 cluster7  
SLC2A8 cluster7  
RAB11FIP5 cluster7  
NSMCE1 cluster7  
SRSF12 cluster7  
DALRD3 cluster7  
FZR1 cluster7  
CIT cluster7  
ACADS cluster7  
PNPLA6 cluster7  
LRRC1 cluster7  
COPS5 cluster7  
RMND5B cluster7  
KCMF1 cluster7  
ST7L cluster7  
C21orf2 cluster7  
SPPL2B cluster7  
TECR cluster7  
AARD cluster7  
FAM161A cluster7  
AGFG1 cluster7  
SLAIN2 cluster7  
MTFR1L cluster7  
DNAJC30 cluster7

PSMD8 cluster7  
MGAT4D cluster7  
ENDOG cluster7  
RP11-1006G14.2 cluster7  
KYNU cluster7  
CHPT1 cluster7  
AC138647.1 Cluster8  
CLDND2 Cluster8  
GOLGA6L2 Cluster8  
LRRC73 Cluster8  
TRAPPC2P1 Cluster8  
SVIP Cluster8  
RP11-547C13.1 Cluster8  
C11orf65 Cluster8  
C15orf65 Cluster8  
CIB4 Cluster8  
C11orf97 Cluster8  
C6orf118 Cluster8  
GOT1L1 Cluster8  
GOLGA6L10 Cluster8  
TPT1-AS1 Cluster8  
NDUFB6 Cluster8  
PRR22 Cluster8  
ZNF563 Cluster8  
CXorf66 Cluster8  
USMG5 Cluster8  
GPR85 Cluster8  
CYTH2 Cluster8  
IGSF10 Cluster8  
TFB1M Cluster8  
TIPARP Cluster8  
C4orf17 Cluster8  
RP11-10A14.3 Cluster8  
PIH1D3 Cluster8  
RBBP6 Cluster8  
MRPS21 Cluster8  
XXbac-BCX196D17.5 Cluster8  
C14orf142 Cluster8  
CTNBL1 Cluster8  
GOLGA6L4 Cluster8  
KBTBD3 Cluster8  
SUV39H2 Cluster8  
KIAA1143 Cluster8  
USP7 Cluster8  
REC8 Cluster8  
PYROXD1 Cluster8  
ERGIC2 Cluster8  
SH3BGR Cluster8  
TOMM20L Cluster8  
MAP7 Cluster8  
7-Mar Cluster8  
FSIP2 Cluster8  
AGPS Cluster8  
KATNA1 Cluster8  
SOD2 Cluster8  
FARP1 Cluster8

TPRG1 Cluster8  
GNG5 Cluster8  
DEPDC7 Cluster8  
RBM7 Cluster8  
USP16 Cluster8  
ATP5S Cluster8  
HINT3 Cluster8  
C19orf18 Cluster8  
DDHD1 Cluster8  
EML2 Cluster8  
PPIL6 Cluster8  
RP11-202D1.2 Cluster8  
ZNF165 Cluster8  
SUDS3 Cluster8  
SPG20 Cluster8  
EFHC1 Cluster8  
GPCPD1 Cluster8  
KPNA6 Cluster8  
METTL6 Cluster8  
TDRD6 Cluster8  
METTL3 Cluster8  
ZNF569 Cluster8  
GOLGA6L9 Cluster8  
FANCF Cluster8  
AKAP13 Cluster8  
INSL6 Cluster8  
OLA1 Cluster8  
SNAP29 Cluster8  
C4orf47 Cluster8  
RBPMS Cluster8  
UBE2W Cluster8  
11-Mar Cluster8  
BTG1 Cluster8  
TUBE1 Cluster8  
SENP2 Cluster8  
PACRGL Cluster8  
SREK1IP1 Cluster8  
SAR1B Cluster8  
HIBCH Cluster8  
EMC8 Cluster8  
ANKRD42 Cluster8  
LRRFIP2 Cluster8  
CCDC82 Cluster8  
CDKN2AIP Cluster8  
TP53TG3D Cluster8  
CEP162 Cluster8  
ZNF106 Cluster8  
MRPL39 Cluster8  
HMGB3 Cluster8  
HMGN1 Cluster8  
5-Mar Cluster8  
FAM177A1 Cluster8  
NEDD1 Cluster8  
LRCH4 Cluster8  
POLK Cluster8  
MAGI1 Cluster8

UPF3B Cluster8  
SLC35G2 Cluster8  
TTL7 Cluster8  
FH Cluster8  
DNAH14 Cluster8  
HOXD8 Cluster8  
CPD Cluster8  
SKIL Cluster8  
RASA2 Cluster8  
C11orf88 Cluster8  
WDR78 Cluster8  
C9orf135 Cluster8  
LRRC39 Cluster8  
CDRT15L2 Cluster8  
Clorf105 Cluster8  
H1FOO Cluster8  
CFAP126 Cluster8  
GEMIN6 Cluster8  
LRRIQ1 Cluster8  
BBS5 Cluster8  
DYNC2LI1 Cluster8  
LINC01351 Cluster8  
FAM24A Cluster8  
CCDC67 Cluster8  
PAIP2B Cluster8  
AC092687.5 Cluster8  
PHOSPHO2 Cluster8  
OLFML2B Cluster8  
ZNRD1 Cluster8  
CTAGE1 Cluster8  
LINC00694 Cluster8  
TBC1D15 Cluster8  
GCA Cluster8  
CDRT15 Cluster8  
ABRA Cluster8  
CTB-181F24.1 Cluster8  
DPP10-AS3 Cluster8  
RP11-264K23.1 Cluster8  
SWT1 Cluster8  
Clorf87 Cluster8  
TMEM243 Cluster8  
BCKDHB Cluster8  
CHMP3 Cluster8  
RP11-156K13.3 Cluster8  
CCDC138 Cluster8  
ODF3L1 Cluster8  
XKR3 Cluster8  
RP11-700N1.1 Cluster8  
ZNF85 Cluster8  
LHFP Cluster8  
SPEF2 Cluster8  
NUTM1 Cluster8  
ENPP2 Cluster8  
RP11-90C4.3 Cluster8  
CCDC81 Cluster8  
RP11-272J7.4 Cluster8

LINC01628 Cluster8  
GOLGA8N Cluster8  
GOLGA8R Cluster8  
SOS1 Cluster8  
NBPF19 Cluster8  
NKX6-1 Cluster8  
C8orf89 Cluster8  
AC015849.2 Cluster8  
C6orf229 Cluster8  
ALS2CR12 Cluster8  
FAM24B Cluster8  
EFHB Cluster8  
DUSP10 Cluster8  
RP11-495K9.3 Cluster8  
RGL4 Cluster8  
RP11-411B10.2 Cluster8  
CTD-2588C8.8 Cluster8  
LINC00703 Cluster8  
TSPAN19 Cluster8  
ARL5B Cluster8  
PRSS46 Cluster8  
RP11-202D18.2 Cluster8  
HIPK4 Cluster8  
RP11-252M21.6 Cluster8  
MRPS30 Cluster8  
LRRC3B Cluster8  
DHX32 Cluster8  
RP11-495P10.1 Cluster8  
AC007740.1 Cluster8  
AY269186.2 Cluster8  
LIPJ Cluster8  
ZNF222 Cluster8  
PLN Cluster8  
GOLGA8S Cluster8  
CMC1 Cluster8  
CCDC30 Cluster8  
RCN1 Cluster8  
CDH18 Cluster8  
PPP1R27 Cluster8  
TRAC Cluster8  
ARFGEF3 Cluster8  
CTC-459M5.2 Cluster8  
XXbac-BPG308J9.3 Cluster8  
RP11-128B16.3 Cluster8  
RP11-317P15.3 Cluster8  
MLIP-AS1 Cluster8  
LRRC69 Cluster8  
TMTC1 Cluster8  
RP11-532M24.1 Cluster8  
IL12A-AS1 Cluster8  
AP005530.1 Cluster8  
CFAP77 Cluster8  
GOLGA8M Cluster8  
DCLK3 Cluster8  
SEC23B Cluster8  
CATSPER4 Cluster8



C11orf53 Cluster8  
HEATR4 Cluster8  
SLAIN1 Cluster8  
RP11-171N4.3 Cluster8  
LINC00869 Cluster8  
TIGD4 Cluster8  
LIMCH1 Cluster8  
TWSG1 Cluster8  
POC5 Cluster8  
NRXN1 Cluster8  
CFAP58 Cluster8  
MBD5 Cluster8  
RP11-785F11.1 Cluster8  
RP11-789F5.1 Cluster8  
RP11-297L17.2 Cluster8  
SPATA41 Cluster8  
LENG1 Cluster8  
IPO8 Cluster8  
TRIM33 Cluster8  
RP11-872J21.3 Cluster8  
RP1-198K11.5 Cluster8  
SIRPG Cluster8  
TFPI Cluster8  
KCNMA1-AS1 Cluster8  
DST Cluster8  
RP11-2C7.1 Cluster8  
DNAJB13 Cluster8  
ZSWIM2 Cluster8  
SLC35D1 Cluster8  
ZBTB48 Cluster8  
CCL20 Cluster8  
CTD-2014E2.6 Cluster8  
C2orf78 Cluster8  
DNAH6 Cluster8  
RP11-637A17.2 Cluster8  
RP11-421L21.3 Cluster8  
RP11-254I22.3 Cluster8  
C1orf189 Cluster8  
SLC9A2 Cluster8  
RP11-99L13.1 Cluster8  
DTHD1 Cluster8  
LINC01534 Cluster8  
RP11-295G12.1 Cluster8  
C10orf88 Cluster8  
RP11-16N2.1 Cluster8  
RP11-395P13.4 Cluster8  
SDE2 Cluster8  
RP11-734K21.3 Cluster8  
CARS Cluster8  
RSPH3 Cluster8  
C7orf72 Cluster8  
CPXCR1 Cluster8  
LINC01040 Cluster8  
ERICH6 Cluster8  
AC078842.4 Cluster8  
FBXO3-AS1 Cluster8

RP5-1024G6.5 Cluster8  
RP13-81N3.2 Cluster8  
SDHAF3 Cluster8  
RP11-173A6.3 Cluster8  
WDFY4 Cluster8  
ZNF560 Cluster8  
MEI4 Cluster8  
RP11-627G18.4 Cluster8  
SNX9 Cluster8  
CCDC150 Cluster8  
RP11-157B13.7 Cluster8  
EPSTI1 Cluster8  
NCBP2L Cluster8  
DYDC2 Cluster8  
CTD-2170G1.2 Cluster8  
RP11-24P14.1 Cluster8  
AGBL3 Cluster8  
ZNF789 Cluster8  
CTD-2001C12.1 Cluster8  
ZNF436-AS1 Cluster8  
RABEPK Cluster8  
GK Cluster8  
NBPF3 Cluster8  
SIRT4 Cluster8  
KB-1043D8.6 Cluster8  
LINC00449 Cluster8  
BRINP3 Cluster8  
RP11-47P18.2 Cluster8  
ANKMY2 Cluster8  
ZNF461 Cluster8  
RP11-70F11.8 Cluster8  
FAM47E Cluster8  
ACSS3 Cluster8  
ERVW-1 Cluster8  
SAMD3 Cluster8  
RP11-537A6.9 Cluster8  
LINC00877 Cluster8  
RP11-219B4.5 Cluster8  
LINC01445 Cluster8  
RSPH4A Cluster8  
RP11-70F11.11 Cluster8  
UBE2H Cluster8  
GOLGA8Q Cluster8  
CHRD2 Cluster8  
RHOQ Cluster8  
SLC35G3 Cluster8  
GPAT3 Cluster8  
FOXB1 Cluster8  
LINC01505 Cluster8  
EFTUD1 Cluster8  
IGF2BP3 Cluster8  
RP13-210D15.4 Cluster8  
TRDN Cluster8  
MIR7-3HG Cluster8  
LTA4H Cluster8  
FSIP1 Cluster8

MTHFD2L Cluster8  
CDIPT Cluster8  
DNAH7 Cluster8  
RP11-626P14.2 Cluster8  
RP11-95M15.1 Cluster8  
CFAP57 Cluster8  
C4orf51 Cluster8  
DACT1 Cluster8  
SGMS2 Cluster8  
IQCA1L Cluster8  
TGIF1 Cluster8  
RNF175 Cluster8  
DHFRL1 Cluster8  
RP11-393I2.4 Cluster8  
LINC01066 Cluster8  
CAPS2 Cluster8  
DPF3 Cluster8  
CD19 Cluster8  
RP4-738P15.1 Cluster8  
KIAA1107 Cluster8  
RP11-169N13.4 Cluster8  
ZFHX4 Cluster8  
RP11-171N4.2 Cluster8  
DLX6 Cluster8  
LINC01553 Cluster8  
RBMS1 Cluster8  
CCDC154 Cluster8  
AGBL2 Cluster8  
SUMF1 Cluster8  
PRDM5 Cluster8  
EFCAB9 Cluster8  
UNC80 Cluster8  
P4HTM Cluster8  
CATSPER1 Cluster8  
ZNF239 Cluster8  
VWA5A Cluster8  
RFTN1 Cluster8  
FLJ40288 Cluster8  
IAPP Cluster8  
APOBEC2 Cluster8  
RP11-223P11.3 Cluster8  
FOXN3 Cluster8  
AP001048.4 Cluster8  
RP4-753D10.5 Cluster8  
AC096669.3 Cluster8  
KIF27 Cluster8  
MTAP Cluster8  
GRAMD1C Cluster8  
NOL10 Cluster8  
AP2M1 Cluster8  
SARAF Cluster8  
ADCK2 Cluster8  
TMEM95 Cluster8  
TNIK Cluster8  
TRPM1 Cluster8  
THBS4 Cluster8

RP11-202D1.3 Cluster8  
LAIR1 Cluster8  
CASC22 Cluster8  
RP11-123010.3 Cluster8  
GOLGA6A Cluster8  
ADK Cluster8  
KDM3A Cluster8  
PVRL3-AS1 Cluster8  
CABLES2 Cluster8  
AC104781.1 Cluster8  
ERICH6B Cluster8  
RP11-202G11.2 Cluster8  
KISS1 Cluster8  
RP11-876F14.1 Cluster8  
ZNF891 Cluster8  
MDGA2 Cluster8  
ATG9B Cluster8  
AP003774.5 Cluster8  
SNCAIP Cluster8  
RP11-756P10.2 Cluster8  
RP11-610J23.1 Cluster8  
CFLAR Cluster8  
GNA11 Cluster8  
MTG2 Cluster8  
AC012462.2 Cluster8  
TPPP3 Cluster8  
PELO Cluster8  
AC007405.6 Cluster8  
SCAMP2 Cluster8  
AC114814.3 Cluster8  
DTX2 Cluster8  
NXPE1 Cluster8  
ASTE1 Cluster8  
FAM228B Cluster8  
KCNU1 Cluster8  
RP11-244B22.6 Cluster8  
EXOC6B Cluster8  
RP11-417F21.1 Cluster8  
AC003973.4 Cluster8  
RNPC3 Cluster8  
RPAP2 Cluster8  
RP1-313I6.12 Cluster8  
OR4M1 Cluster8  
EFHC2 Cluster8  
FAM13C Cluster8  
ZNF814 Cluster8  
FAM122C Cluster8  
RP11-15F12.3 Cluster8  
SMIM2 Cluster8  
ATAT1 Cluster8  
JAZF1 Cluster8  
HSPB7 Cluster8  
ZNF385B Cluster8  
EMC9 Cluster8  
PRMT5-AS1 Cluster8  
IL20RB Cluster8

FAM47B Cluster8  
ZNF397 Cluster8  
PSME4 Cluster8  
NOS3 Cluster8  
SYMPK Cluster8  
NPAS2 Cluster8  
TMED5 Cluster8  
SCIN Cluster8  
RP11-548M13.1 Cluster8  
RDH8 Cluster8  
CTDP1 Cluster8  
CBY1 Cluster8  
STX17 Cluster8  
TOR2A Cluster8  
TMEM108 Cluster8  
GSK3B Cluster8  
RP4-625H18.2 Cluster8  
ANTXRL Cluster8  
DDX53 Cluster8  
TGIF2LX Cluster8  
AC009365.4 Cluster8  
MCOLN2 Cluster8  
ARID3A Cluster8  
TRAPPC11 Cluster8  
SCLT1 Cluster8  
CCDC189 Cluster8  
LANCL1 Cluster8  
TDP1 Cluster8  
POMGNT1 Cluster8  
TXNL4A Cluster8  
ASXL1 Cluster8  
RP11-29B9.2 Cluster8  
RANBP17 Cluster8  
CTD-2291D10.2 Cluster8  
CNOT8 Cluster8  
MAGI3 Cluster8  
HMBOX1 Cluster8  
LINC01495 Cluster8  
LINC01224 Cluster8  
ZNF263 Cluster8  
PGGT1B Cluster8  
ADIPOR1 Cluster8  
ANKAR Cluster8  
C18orf54 Cluster8  
CADM1 Cluster8  
CCDC66 Cluster8  
USP15 Cluster8  
KPNA1 Cluster8  
CDH2 Cluster8  
MCFD2 Cluster8  
CPA5 Cluster8  
WDR41 Cluster8  
RFX1 Cluster8  
EPS8 Cluster8  
CMTR2 Cluster8  
STX2 Cluster8

CNN3 Cluster8  
KLHL12 Cluster8  
CUL3 Cluster8  
ZNF766 Cluster8  
DIS3 Cluster8  
MEG3 Cluster8  
NR3C1 Cluster8  
RCL1 Cluster8  
NOL12 Cluster8  
FERMT2 Cluster8  
TRUB1 Cluster8  
CHCHD3 Cluster8  
JUN Cluster8  
GRINA Cluster9  
ACTL10 Cluster9  
C9orf116 Cluster9  
C2orf73 Cluster9  
TEKT3 Cluster9  
PP2D1 Cluster9  
CAPSL Cluster9  
JARID2-AS1 Cluster9  
C5orf49 Cluster9  
FAM209A Cluster9  
ERICH2 Cluster9  
FAM209B Cluster9  
MS4A6E Cluster9  
TMCO2 Cluster9  
C2orf40 Cluster9  
ACTL7B Cluster9  
SPACA4 Cluster9  
TEX29 Cluster9  
CCIN Cluster9  
ASB17 Cluster9  
RP11-502N13.2 Cluster9  
C20orf195 Cluster9  
CAST Cluster9  
IQGAP2 Cluster9  
ACTRT3 Cluster9  
WBSCR28 Cluster9  
SUN5 Cluster9  
FAM186A Cluster9  
FAM8A1 Cluster9  
TEX33 Cluster9  
ACOT13 Cluster9  
CALCOCO2 Cluster9  
SAXO1 Cluster9  
AKAP3 Cluster9  
CDKN3 Cluster9  
NDRG3 Cluster9  
RP4-586015.1 Cluster9  
TEX43 Cluster9  
PDCL2 Cluster9  
RP11-498B4.5 Cluster9  
SERP2 Cluster9  
FEM1B Cluster9  
C1orf111 Cluster9

AC015971.2 Cluster9  
DAB1-AS1 Cluster9  
SPACA7 Cluster9  
PLCZ1 Cluster9  
RP11-983G14.1 Cluster9  
DYNLT3 Cluster9  
SUN3 Cluster9  
RP11-561E1.1 Cluster9  
TNFAIP6 Cluster9  
PSD3 Cluster9  
PKHD1 Cluster9  
CXXC5 Cluster9  
C2orf74 Cluster9  
RNF141 Cluster9  
IZUMO2 Cluster9  
CFAP36 Cluster9  
PRSS54 Cluster9  
DYNLRB2 Cluster9  
LYZL2 Cluster9  
FAM92A1 Cluster9  
XYLT2 Cluster9  
TES Cluster9  
DESI1 Cluster9  
ROPN1 Cluster9  
TXNDC2 Cluster9  
TRIM17 Cluster9  
LINC01095 Cluster9  
SPACA3 Cluster9  
DUSP13 Cluster9  
CREM Cluster9  
CAPN3 Cluster9  
RP11-309L24.4 Cluster9  
LACE1 Cluster9  
AC004510.3 Cluster9  
MAN1A1 Cluster9  
CTNNA2 Cluster9  
TMEM190 Cluster9  
C1orf185 Cluster9  
ZNF829 Cluster9  
SLC44A2 Cluster9  
PEX5L-AS2 Cluster9  
RP11-413G15.1 Cluster9  
C5orf46 Cluster9  
TIPARP-AS1 Cluster9  
FILIP1L Cluster9  
SMIM23 Cluster9  
FAM153B Cluster9  
ARRDC5 Cluster9  
RNF148 Cluster9  
C12orf60 Cluster9  
ZBTB20 Cluster9  
AC109829.1 Cluster9  
TRABD2A Cluster9  
KLHL7 Cluster9  
SULF1 Cluster9  
SPATA25 Cluster9

ADSSL1 Cluster9  
CCDC89 Cluster9  
USP2-AS1 Cluster9  
TMEM144 Cluster9  
OLAH Cluster9  
BBX Cluster9  
RP11-545G3.1 Cluster9  
RP11-360D2.1 Cluster9  
FTMT Cluster9  
ACRV1 Cluster9  
ZBTB38 Cluster9  
SOX6 Cluster9  
TRIML1 Cluster9  
RP11-779018.1 Cluster9  
CCDC126 Cluster9  
KLF17 Cluster9  
LINC01125 Cluster9  
RP1-20208.3 Cluster9  
TEKT2 Cluster9  
RP11-349E4.1 Cluster9  
EQTN Cluster9  
AC004448.5 Cluster9  
ANKRD9 Cluster9  
SOX30 Cluster9  
ETF1 Cluster9  
BRI3 Cluster9  
AC116614.1 Cluster9  
C17orf64 Cluster9  
SCOC Cluster9  
ZC3H14 Cluster9  
COMMD3 Cluster9  
LRRC18 Cluster9  
UTRN Cluster9  
LINC00643 Cluster9  
USP46 Cluster9  
CCER1 Cluster9  
SWI5 Cluster9  
RP11-206L10.9 Cluster9  
DIAPH3-AS2 Cluster9  
TTC23L Cluster9  
PDZD2 Cluster9  
TEKT1 Cluster9  
EFCAB11 Cluster9  
FAM135B Cluster9  
NEBL Cluster9  
UNC13C Cluster9  
RP11-101C21.4 Cluster9  
LYZL6 Cluster9  
LINC01198 Cluster9  
MBD3L1 Cluster9  
AC009299.2 Cluster9  
AC104654.1 Cluster9  
SPANXN5 Cluster9  
FAM221B Cluster9  
RP11-639B1.1 Cluster9  
NLRP1 Cluster9



RP11-684B21.1 Cluster9  
ZNRF4 Cluster9  
LINC01487 Cluster9  
RP4-569M23.5 Cluster9  
FKBP7 Cluster9  
LYPD6B Cluster9  
HOMEZ Cluster9  
RP11-85021.5 Cluster9  
AASDHPPT Cluster9  
ACRBP Cluster9  
CTC-43909.3 Cluster9  
LINC00642 Cluster9  
SETD9 Cluster9  
SESN3 Cluster9  
NPIP6 Cluster9  
LYZL1 Cluster9  
MYH3 Cluster9  
APPBP2 Cluster9  
SMAD1-AS2 Cluster9  
RP11-1136G4.1 Cluster9  
RP11-407A16.3 Cluster9  
CCT8L2 Cluster9  
DOC2A Cluster9  
FAM205A Cluster9  
RP11-219J21.1 Cluster9  
ATF5 Cluster9  
CCDC183 Cluster9  
FAM27C Cluster9  
CAND2 Cluster9  
RP11-552I14.1 Cluster9  
NUPL2 Cluster9  
C7orf34 Cluster9  
CEP152 Cluster9  
STXBP5-AS1 Cluster9  
RP11-462P6.1 Cluster9  
C4orf45 Cluster9  
PDILT Cluster9  
DRAM1 Cluster9  
MMEL1 Cluster9  
C7orf61 Cluster9  
NOL4 Cluster9  
RUNX2 Cluster9  
LRRC52 Cluster9  
RP11-5803.2 Cluster9  
RTKN2 Cluster9  
LINC01052 Cluster9  
PLCH1 Cluster9  
RP11-452K12.4 Cluster9  
LMNB2 Cluster9  
RP11-375018.2 Cluster9  
SPAM1 Cluster9  
ADAM29 Cluster9  
NPIP15 Cluster9  
TSSK4 Cluster9  
SMAD1 Cluster9  
GRID1-AS1 Cluster9

KLF5 Cluster9  
RP11-100F15.2 Cluster9  
TMEM45A Cluster9  
GS1-124K5.4 Cluster9  
CNTN4 Cluster9  
RP11-355E10.1 Cluster9  
C6orf10 Cluster9  
SLC38A9 Cluster9  
LINC01183 Cluster9  
AC006019.3 Cluster9  
DDX20 Cluster9  
LINC01304 Cluster9  
RP11-326A19.3 Cluster9  
LINC00254 Cluster9  
RP11-781A6.1 Cluster9  
CCDC105 Cluster9  
AC096570.1 Cluster9  
HDAC9 Cluster9  
CLDN12 Cluster9  
USP44 Cluster9  
LYSMD2 Cluster9  
SPATA9 Cluster9  
RP11-560G2.1 Cluster9  
LNX1 Cluster9  
STAT4 Cluster9  
AC079354.3 Cluster9  
RP11-550H2.1 Cluster9  
EFCAB3 Cluster9  
CEP57 Cluster9  
LYZL4 Cluster9  
LAMA4 Cluster9  
RPP38 Cluster9  
ARL4D Cluster9  
TRMT5 Cluster9  
ALLC Cluster9  
STK32C Cluster9  
CDC40 Cluster9  
LINC01589 Cluster9  
RP11-22M7.2 Cluster9  
SPANXN3 Cluster9  
ABCA10 Cluster9  
EPHA6 Cluster9  
RP11-20B24.5 Cluster9  
IZUMO1 Cluster9  
ZMYND15 Cluster9  
RFX3 Cluster9  
RP11-457M11.7 Cluster9  
CCDC121 Cluster9  
RGPD4-AS1 Cluster9  
ARMC3 Cluster9  
ZBBX Cluster9  
LATS2 Cluster9  
C17orf98 Cluster9  
RP3-325F22.3 Cluster9  
SPACA1 Cluster9  
CASC16 Cluster9

SSMEM1 Cluster9  
RP11-1080G15.1 Cluster9  
RP11-746B8.1 Cluster9  
MTPAP Cluster9  
C11orf94 Cluster9  
C9orf153 Cluster9  
AC016831.7 Cluster9  
IZUMO3 Cluster9  
RP11-829H16.3 Cluster9  
RP5-937E21.8 Cluster9  
AC019055.1 Cluster9  
RP11-614F17.2 Cluster9  
TMEM247 Cluster9  
C22orf42 Cluster9  
AQP7 Cluster9  
CTD-2296D1.5 Cluster9  
MAATS1 Cluster9  
ING1 Cluster9  
C9orf131 Cluster9  
PCF11 Cluster9  
TMEM262 Cluster9  
CRADD Cluster9  
DIAPH3 Cluster9  
NABP1 Cluster9  
ODF3 Cluster9  
C16orf92 Cluster9  
AC097467.2 Cluster9  
ARMC4 Cluster9  
CFAP45 Cluster9  
RP11-456O19.2 Cluster9  
ANK2 Cluster9  
TUSC7 Cluster9  
RMDN2 Cluster9  
CARNMT1 Cluster9  
RP5-928E24.2 Cluster9  
CTD-2135D7.2 Cluster9  
ADAD1 Cluster9  
CCDC63 Cluster9  
PACRG-AS2 Cluster9  
LINC01192 Cluster9  
ADGB Cluster9  
GRM7-AS3 Cluster9  
SLC16A12-AS1 Cluster9  
RP11-1109M24.5 Cluster9  
ETNK1 Cluster9  
RP4-726F1.2 Cluster9  
RP13-60M5.2 Cluster9  
CASC23 Cluster9  
RGS11 Cluster9  
IL13RA2 Cluster9  
TEX36 Cluster9  
LINC01492 Cluster9  
RP1-17K7.2 Cluster9  
CCDC182 Cluster9  
CCDC27 Cluster9  
CA10 Cluster9

SIRT1 Cluster9  
RP11-195L15.2 Cluster9  
RP11-157E14.1 Cluster9  
FANK1 Cluster9  
RP11-557H15.3 Cluster9  
CTD-3185P2.1 Cluster9  
TTC29 Cluster9  
RAB27B Cluster9  
LINC00917 Cluster9  
RP11-45L9.1 Cluster9  
LINC01440 Cluster9  
RP11-61G19.2 Cluster9  
DHRS9 Cluster9  
FAM19A2 Cluster9  
PRSS55 Cluster9  
LECT2 Cluster9  
NUCB2 Cluster9  
ATP1A4 Cluster9  
RP11-69E11.8 Cluster9  
OSGIN2 Cluster9  
ITPRIPL1 Cluster9  
MEGF11 Cluster9  
PPP6R1 Cluster9  
RP11-111A21.1 Cluster9  
KLF4 Cluster9  
AP003025.2 Cluster9  
PDP1 Cluster9  
CCDC60 Cluster9  
C12orf80 Cluster9  
UBL3 Cluster9  
CUL2 Cluster9  
RP11-318C2.1 Cluster9  
COL25A1 Cluster9  
PIBF1 Cluster9  
STK32B Cluster9  
RP11-778J15.1 Cluster9  
RP11-739N10.1 Cluster9  
OR2H1 Cluster9  
THCAT158 Cluster9  
PRRX2 Cluster9  
CCDC116 Cluster9  
FAIM2 Cluster9  
CAMK4 Cluster9  
CTD-2010I22.2 Cluster9  
TBC1D28 Cluster9  
CATSPER3 Cluster9  
RP11-358H18.2 Cluster9  
POLR1B Cluster9  
ADTRP Cluster9  
SLC44A5 Cluster9  
RP11-690C23.2 Cluster9  
CTD-2542C24.8 Cluster9  
MGAT4C Cluster9  
TFDP2 Cluster9  
C15orf41 Cluster9  
APOBEC4 Cluster9

RP11-503L19.1 Cluster9  
RP11-712B9.2 Cluster9  
TPP2 Cluster9  
CNBD1 Cluster9  
PCCA-AS1 Cluster9  
TEX26-AS1 Cluster9  
DIAPH3-AS1 Cluster9  
LINC01491 Cluster9  
TJP3 Cluster9  
POLB Cluster9  
TOPORS-AS1 Cluster9  
CAB39L Cluster9  
PPFIA2 Cluster9  
ISPD-AS1 Cluster9  
SCN3A Cluster9  
CEP41 Cluster9  
CASC1 Cluster9  
SRGAP1 Cluster9  
RP11-168P8.5 Cluster9  
RP5-1022P6.4 Cluster9  
RP3-417L20.4 Cluster9  
LINC00158 Cluster9  
RNF217 Cluster9  
ADAM20 Cluster9  
CCDC102B Cluster9  
SPATA5 Cluster9  
UGT3A1 Cluster9  
ZNF479 Cluster9  
RP11-864J10.4 Cluster9  
ZNF433 Cluster9  
LINC01603 Cluster9  
NAALADL2 Cluster9  
RP11-268P4.4 Cluster9  
TMC7 Cluster9  
NOXRED1 Cluster9  
ALKBH3-AS1 Cluster9  
PCDH9-AS3 Cluster9  
HADH Cluster9  
ADAM7 Cluster9  
CNNM1 Cluster9  
RHOBTB1 Cluster9  
RP3-388M5.9 Cluster9  
RP11-379C10.1 Cluster9  
AC011752.1 Cluster9  
RP11-474D1.2 Cluster9  
RP11-3L23.2 Cluster9  
DFNB59 Cluster9  
CUL1 Cluster9  
RP11-300J18.2 Cluster9  
CTD-2201G3.1 Cluster9  
SCD5 Cluster9  
CTD-2184C24.2 Cluster9  
PPARGC1A Cluster9  
IFI27L1 Cluster9  
AL450226.2 Cluster9  
CAGE1 Cluster9

LINC00202-2 Cluster9  
CNBD2 Cluster9  
ERICH3 Cluster9  
RNF14 Cluster9  
PDK1 Cluster9  
ZSCAN31 Cluster9  
PREX2 Cluster9  
BX255923.3 Cluster9  
RP13-39P12.3 Cluster9  
SPATA6L Cluster9  
KIAA1683 Cluster9  
MMP20 Cluster9  
CELF2 Cluster9  
MYCBPAP Cluster9  
FHAD1 Cluster9  
CELF2-AS1 Cluster9  
LRRTM3 Cluster9  
BTBD16 Cluster9  
C2orf42 Cluster9  
OPN3 Cluster9  
TEAD2 Cluster9  
AC104777.4 Cluster9  
RP11-394A14.4 Cluster9  
PPM1A Cluster9  
PLEKHB1 Cluster9  
RAP1GDS1 Cluster9  
RP11-46107.1 Cluster9  
CFAP65 Cluster9  
C14orf28 Cluster9  
RP11-6N13.1 Cluster9  
NADK2 Cluster9  
TENM4 Cluster9  
PWRN2 Cluster9  
RP11-526A4.1 Cluster9  
ACADL Cluster9  
FUT10 Cluster9  
C3orf84 Cluster9  
SEPT4-AS1 Cluster9  
FAHD2B Cluster9  
PLSCR2 Cluster9  
LGALS8 Cluster9  
RP11-1060J15.4 Cluster9  
PRICKLE2-AS1 Cluster9  
PMS1 Cluster9  
TMEM89 Cluster9  
TAT-AS1 Cluster9  
NEK11 Cluster9  
GOLGA6L22 Cluster9  
MYO3A Cluster9  
KIF15 Cluster9  
FLT1 Cluster9  
KIAA0753 Cluster9  
PACRG Cluster9  
RP11-213G2.2 Cluster9  
ATP6V1E2 Cluster9  
FGD4 Cluster9

AC073628.1 Cluster9  
TULP2 Cluster9  
MFSD14A Cluster9  
ANLN Cluster9  
RP11-262H14.3 Cluster9  
CDKL3 Cluster9  
LINC01010 Cluster9  
AP1G1 Cluster9  
C21orf62-AS1 Cluster9  
DYM Cluster9  
GOLGA6L1 Cluster9  
ULK4 Cluster9  
CYP2R1 Cluster9  
RP5-827L5.1 Cluster9  
NTRK3 Cluster9  
UBR7 Cluster9  
ELAVL4 Cluster9  
ANKMY1 Cluster9  
PBXIP1 Cluster9  
AXDND1 Cluster9  
PEX11G Cluster9  
TMF1 Cluster9  
C3orf38 Cluster9  
RIOK3 Cluster9  
SKAP2 Cluster9  
SLC38A6 Cluster9  
ATP6V1C1 Cluster9  
DNAJC24 Cluster9  
PHF20 Cluster9  
URI1 Cluster9  
MORN5 Cluster9  
NEK10 Cluster9  
SEL1L2 Cluster9  
RP11-2017.2 Cluster9  
RP11-79C6.3 Cluster9  
CCDC53 Cluster9  
AC000036.4 Cluster9  
Clorf141 Cluster9  
ACSL5 Cluster9  
USP50 Cluster9  
RP11-163M18.1 Cluster9  
ZNF415 Cluster9  
PAH Cluster9  
RP11-566H8.3 Cluster9  
RP11-863K10.2 Cluster9  
RP11-386B13.3 Cluster9  
RP11-404O13.1 Cluster9  
TEKT4 Cluster9  
RP11-606D9.1 Cluster9  
RP1-207H1.3 Cluster9  
RP11-92C4.3 Cluster9  
CTD-2050B12.1 Cluster9  
EYS Cluster9  
GALR1 Cluster9  
CPNE8 Cluster9  
HEATR9 Cluster9

RP11-510M2.6 Cluster9  
AC016909.1 Cluster9  
CTC-493L21.1 Cluster9  
CLYBL-AS1 Cluster9  
RP3-446N13.1 Cluster9  
SPAG17 Cluster9  
RP11-259K15.2 Cluster9  
CNIH2 Cluster9  
FCRL5 Cluster9  
RP11-387H17.4 Cluster9  
ZHX3 Cluster9  
BRIP1 Cluster9  
RP11-677I18.3 Cluster9  
LINC00971 Cluster9  
PGR Cluster9  
RP3-430A16.1 Cluster9  
RP11-670N15.1 Cluster9  
FRK Cluster9  
CHN2 Cluster9  
RP11-428J1.5 Cluster9  
KIRREL3-AS2 Cluster9  
RP13-653N12.1 Cluster9  
MAST4 Cluster9  
CCDC68 Cluster9  
RP11-392P7.6 Cluster9  
RP11-713M6.2 Cluster9  
USP25 Cluster9  
LINC01330 Cluster9  
SLC14A2-AS1 Cluster9  
MOSPD1 Cluster9  
SLC16A7 Cluster9
