# Supplementary material for: The adult human testis transcriptional cell atlas
Source: PubMed Central journal article supplement (PMC6274646; doi:10.1038/s41422-018-0099-2), 2018-10-12
Supplement: 41422_2018_99_MOESM13_ESM.pdf [file 41422_2018_99_MOESM13_ESM.pdf]

Supplementary information, Table S5: List Genes that Show Differential Expression Patterns in Different States.

Gene GROUP  
C19orf84 1  
MSL3 1  
PIWIL4 1  
RPL22L1 1  
TUBA1A 1  
NOC4L 1  
CNN1 1  
PHGDH 1  
VIM 1  
EGR4 1  
DCAF12 1  
RAC3 1  
AZU1 1  
APBB1 1  
DUSP5 1  
ST3GAL4 1  
CRIP2 1  
INCA1 1  
LIN7B 1  
SCT 1  
CHD7 1  
ACTG2 1  
GAN 1  
BAIAP2 1  
PKM 1  
SPOCD1 1  
RGS14 1  
CAMK2B 1  
FSD1 1  
HOXC9 1  
PLPPR5 1  
NRG2 1  
RNASET2 1  
GUK1 1  
CSRP2 1  
SPI1 1  
SERTAD4-AS1 1  
FNDC4 1  
MROH6 1  
PLPPR3 1  
FOXP4 1  
TMEM63B 1  
PSMF1 1  
KRT8 1  
SURF2 1  
HACD4 1  
PKN1 1  
AGGF1 1  
SPO11 1  
OPTN 1  
SOX17 1  
TSPAN33 1  
NUDT14 1  
RHOBTB3 1

FOXD1 1  
SLC1A6 1  
SP5 1  
STRN4 1  
SCARB2 1  
PLPP2 1  
METTL5 1  
KDM2B 1  
AIG1 1  
FBXO47 1  
PVALB 1  
VCAM1 1  
KLC3 1  
ANKRD37 1  
OXT 1  
CEP131 1  
FIP1L1 1  
RP11-307P5.1 1  
KANSL1 1  
NMU 1  
HTATIP2 1  
TKT 1  
MCRS1 1  
PPP1R36 1  
CEP85L 1  
TMEM189 1  
MYOM2 1  
OLIG1 1  
KRT25 1  
PPP6R1 1  
SF3A2 1  
SNAPC2 1  
DRC7 1  
FAM159B 1  
NKX6-2 1  
C1orf233 1  
RP11-96B5.4 1  
MARCH10 1  
PPM1J 1  
RABGGTA 1  
EPAS1 1  
MT3 1  
HSF2 1  
RASGEF1A 1  
KAT8 1  
RPRM 1  
SPINK5 1  
POU3F1 1  
MIF4GD 1  
FMR1 1  
DND1 1  
RP1-69M21.2 1  
EMX1 1  
HLA-A 1  
COL21A1 1  
FAIM2 1

LANCL2 1  
RBFOX3 1  
TOLLIP 1  
EMB 1  
PALLD 1  
ANXA7 1  
SFMBT1 1  
MFHAS1 1  
CD47 1  
CADM2 1  
YPEL3 1  
CCDC172 1  
EXOSC9 1  
ACE 1  
MUC12 1  
HOXA7 1  
KCNAB1 1  
HOPX 1  
HCST 1  
IRX2 1  
PAK4 1  
ASPSCR1 1  
MAP2K7 1  
DBX2 1  
SH3GL2 1  
REEP2 1  
CRYL1 1  
KDM1B 1  
NIN 1  
ACTR8 1  
MAPKAPK2 1  
CNOT3 1  
SYCP1 1  
ISL1 1  
UBTD1 1  
ZNF704 1  
SNHG18 1  
CBARP 1  
TCEAL2 1  
PDCD7 1  
INSR 1  
LMO7 1  
LYSMD2 1  
TESK1 1  
ELMSAN1 1  
SCGB3A1 1  
NR2F1 1  
SPEG 1  
MAPK8IP1 1  
SRRT 1  
TDRD5 1  
RP11-973H7.1 1  
SMARCD3 1  
SLC41A3 1  
PRR5 1  
AIF1L 1

DEAF1 1  
AC005863.2 1  
CXXC5 1  
EDEM1 1  
DEGS2 1  
KCNH2 1  
WNT3 1  
AATF 1  
HAGLROS 1  
MAPK3 1  
ACAP3 1  
DLX6 1  
CRYBA4 1  
LGALS3 1  
PGF 1  
RP13-942N8.1 1  
SAMM50 1  
SPSB1 1  
PQLC1 1  
FGF9 1  
CHEK2 1  
AGAP3 1  
ZBTB43 1  
MAL2 1  
DLGAP3 1  
PPP1R1B 1  
TSPAN12 1  
MARCH2 1  
PIAS4 1  
MPP6 1  
N4BP2L1 1  
AFAP1L1 1  
GBP2 1  
SLC25A1 1  
RAB31 1  
CEBPB 1  
FAM89A 1  
NAALAD2 1  
COBL 1  
DLGAP4 1  
HMSD 1  
PRR35 1  
ANGPTL4 1  
EAPP 1  
AREG 1  
RASGEF1B 1  
CXCL14 1  
DAB2IP 1  
TEAD4 1  
MTURN 1  
ATIC 1  
CELF4 1  
CHRD2 1  
H2AFY2 1  
TRAM2-AS1 1  
PDLIM4 1

PRKX 1  
CNN3 1  
ZCCHC14 1  
AP2A1 1  
HLA-DPA1 1  
PAK6 1  
POLR3C 1  
RP11-491F9.1 1  
CCDC110 1  
RP4-639F20.1 1  
CITED1 1  
MPP1 1  
AC097724.3 1  
SH2B2 1  
CA8 1  
ATOH8 1  
AIMP2 1  
BOP1 1  
DYRK4 1  
ERICH5 1  
RASL11B 1  
ALDH3A1 1  
SKIDA1 1  
MED24 1  
ZDHHC21 1  
CACNB3 1  
TESC 1  
ARHGDIG 1  
DNAJC1 1  
DES 1  
PHC2 1  
INSIG1 1  
ASCL2 1  
SMAD6 1  
NKAPL 1  
DGAT2 1  
STAT5B 1  
FAM46A 1  
ETNK2 1  
ZNF236 1  
GGACT 1  
CAMK1 1  
ARRDC3 1  
RP11-386G11.5 1  
CDC14B 1  
SDR16C5 1  
ASPHD2 1  
RBP4 1  
VAV3 1  
LINC01447 1  
PPP1R3F 1  
SNHG19 1  
HECA 1  
FAM102A 1  
ASXL3 1  
GLUD1 1

NUB1 1  
BAG3 1  
PRKAR1B 1  
PAM 1  
AKR1A1 1  
UHMK1 1  
BAIAP2L2 1  
CDH7 1  
ATP1B1 1  
RIMS1 1  
POLN 1  
CHD5 1  
KCNK1 1  
RAMP1 1  
AP000253.1 1  
RAB38 1  
DUSP23 1  
AVPI1 1  
LINC01183 1  
TSPAN15 1  
RFWD3 1  
TRAF7 1  
TRIM71 1  
DNAJA4 1  
IFITM2 1  
TRIM39 1  
TWIST1 1  
CCDC63 1  
RP11-256I23.2 1  
LXN 1  
DYDC1 1  
ADAD2 1  
HLA-DPB1 1  
MED27 1  
RP11-255M2.3 1  
BSPRY 1  
SNTG2 1  
LMNTD2 1  
PRUNE2 1  
KCNMB4 1  
ASGR1 1  
FAM212A 1  
PELI2 1  
GPRC5C 1  
TTBK2 1  
TDRD6 1  
LRRC42 1  
HMOX1 1  
STX17-AS1 1  
MSRA 1  
SMIM1 1  
NES 1  
PCAT6 1  
SPINT1 1  
FXYS5 1  
MYO1E 1

EXOC3L2 1  
MMP11 1  
SLC12A5 1  
PARVB 1  
RP11-293A21.1 1  
GRINA 1  
LARP6 1  
RFNG 1  
ERICH2 1  
C1orf115 1  
KSR2 1  
NEO1 1  
MX1 1  
KMT2B 1  
MAST2 1  
INSL6 1  
SLC25A22 1  
TSC22D1 1  
OLFM2 1  
SWAP70 1  
YAF2 1  
CYP4X1 1  
FKBP6 1  
GPX3 1  
WWP1 1  
ICA1L 1  
MROH8 1  
THAP4 1  
TRIM36 1  
NBL1 1  
TMEM39B 1  
C19orf73 1  
ARHGAP44 1  
DCTN6 1  
RBCK1 1  
HMGCL 1  
DFNB31 1  
CARS2 1  
ASB2 1  
SMARCD2 1  
STARD10 1  
PPP2R5D 1  
CAB39 1  
PLA2G16 1  
LRRC8A 1  
DDR1 1  
ASUN 1  
MORC1 1  
DOK4 1  
WDR45 1  
RBP1 1  
TMEM266 1  
AKAP12 1  
PAPD7 1  
SHKBP1 1  
LINC01117 1

PMEPA1 1  
MAGEC1 1  
RP11-989E6.10 1  
RUNX3 1  
GOLIM4 1  
MVB12B 1  
HOMER3 1  
FAM222A 1  
SETD1A 1  
NUPL2 1  
CD81 1  
CDH15 1  
RP5-1085F17.3 1  
ERCC3 1  
RIMKLA 1  
CEP170B 1  
ADAMTS12 1  
IGFBP6 1  
PRKAG2-AS1 1  
HOXB7 1  
CEP112 1  
TUSC1 1  
AREL1 1  
PIP5K1B 1  
BRAP 1  
EMP3 1  
PLK2 1  
RFX2 1  
GABRG3 1  
PLEKHH3 1  
TCF7 1  
LRIG1 1  
DGKD 1  
CAB39L 1  
RBFOX2 1  
TRPM4 1  
SCAMP5 1  
AKT1S1 1  
LECT1 1  
KRTDAP 1  
C19orf81 1  
OLA1 1  
DYRK2 1  
CTHRC1 1  
MAP2K5 1  
RAB32 1  
CIART 1  
RP11-108M9.4 1  
TMEM247 1  
IGF2 1  
IGFBP4 1  
PER1 1  
RUNX1T1 1  
MAGEB1 1  
LMCD1 1  
JUND 1



PCGF5 1  
SGCG 1  
ZNF746 1  
CCNO 1  
INPP5K 1  
SLC35F2 1  
COG1 1  
TSC22D4 1  
ZBED6 1  
FLCN 1  
ZNF628 1  
MAP2K2 1  
DIAPH2 1  
GSS 1  
STAU2 1  
SEMA6D 1  
ZNF496 1  
BORCS5 1  
MAP4K2 1  
FAM69B 1  
AC136616.1 1  
ALS2 1  
ZMYM4 1  
B3GALT6 1  
FAM184A 1  
AC009961.3 1  
KPNA4 1  
STAT3 1  
PDE4A 1  
WNK2 1  
ZC3H3 1  
BRAF 1  
CXADR 1  
CNFN 1  
AFTPH 1  
CLU 1  
PIK3CA 1  
RIMS4 1  
MGST2 1  
BEX1 1  
LINC01623 1  
TMEM31 1  
BEX4 1  
HYLS1 1  
S100A10 2  
TUBB 2  
FKBP8 2  
YBX3 2  
PCSK1N 2  
STK24 2  
MFF 2  
AES 2  
RPS4X 2  
SERPINE2 2  
SSBP3 2  
ID4 2

FOXP1 2  
LY6E 2  
FAM92A1 2  
LMO4 2  
MYO6 2  
ID2 2  
ID1 2  
YPEL2 2  
ME2 2  
SMARCA1 2  
STK31 2  
GYG1 2  
ATP9A 2  
C15orf61 2  
IGF2BP2 2  
DTNB 2  
RNF146 2  
FST 2  
COMMD3 2  
FAM150B 2  
FAM26F 2  
TCF3 2  
TMEM14A 2  
SIX1 2  
BTF3L4 2  
ARID4A 2  
CNTNAP2 2  
BLVRA 2  
PBX1 2  
SERINC2 2  
GNAS 2  
RHOC 2  
ROR2 2  
LPIN2 2  
NDUFS4 2  
CERS6 2  
HES1 2  
TCF4 2  
VIPR2 2  
ITGB1 2  
BNC2 2  
MLLT3 2  
NEDD4L 2  
FHL1 2  
IGLON5 2  
ATF5 2  
DLK1 2  
SATB1 2  
ADAR 2  
NFIB 2  
ZBTB16 2  
IFI16 2  
MYO10 2  
TSPYL5 2  
STX3 2  
PMAIP1 2

CRTAP 2  
RP11-11N9.4 2  
BFSP1 2  
SERPING1 2  
NEK6 2  
THRA 2  
TLK1 2  
VAT1 2  
PEX13 2  
ARRDC4 2  
EYA2 2  
NFIA 2  
C1QTNF4 2  
ATXN1 2  
DACT1 2  
PALM3 2  
PHF21A 2  
UBXN6 2  
HEY1 2  
KMT2C 2  
RAB5C 2  
SYNE2 2  
LARP1B 2  
UGCG 2  
TPBG 2  
ELOVL5 2  
SKAP2 2  
ARFGEF1 2  
RP11-51J9.5 2  
ARL3 2  
ZDHHC14 2  
TDRD3 2  
PIP4K2A 2  
ZFP36L1 2  
SGF29 2  
RBMS1 2  
HBP1 2  
TTC39C 2  
RNF130 2  
CCDC144NL-AS1 2  
KAT6B 2  
USP42 2  
BMPR1B 2  
PFKL 2  
CNTNAP3B 2  
CACFD1 2  
CCNJL 2  
UACA 2  
CEBPD 2  
NPB 2  
ECI2 2  
LY6H 2  
PLPP1 2  
PPP2R4 2  
RP11-314N14.1 2  
HERC4 2

MDFI 2  
DPP10-AS1 2  
FAM114A1 2  
VPS26B 2  
CLEC11A 2  
SESN2 2  
LINC01089 2  
WASF1 2  
LINC01511 2  
ZCCHC2 2  
SSFA2 2  
CUL4A 2  
CD55 2  
MAP1LC3A 2  
CAPRIN2 2  
DPYSL2 2  
NKAIN4 2  
SIRT5 2  
AK4 2  
NANOS2 2  
GSK3B 2  
LBH 2  
ATG13 2  
ZRSR2 2  
PTPN14 2  
GLTSCR2 2  
ZNF428 2  
UTF1 2  
USP11 2  
KRT18 2  
GNB2L1 2  
MAGEB2 2  
COTL1 2  
PTRHD1 2  
PODXL2 2  
BAG6 2  
PPP2R1A 2  
CDK17 2  
GNB2 2  
PTOV1 2  
ASNS 2  
DPPA2 2  
SUPT5H 2  
NFKBIA 2  
IDH2 2  
S100A11 2  
NEIL2 2  
BBX 2  
ANXA11 2  
DNAJB1 2  
GPI 2  
A2M 2  
AKR1B1 2  
SERPINI1 2  
RAD21 2  
RRBP1 2

C9orf16 2  
BLMH 2  
HENMT1 2  
GPR137 2  
FGFR3 2  
PIWIL2 2  
OSER1 2  
UBA1 2  
CLTB 2  
CHPT1 2  
RALY 2  
ELOVL4 2  
HABP4 2  
RAB3IP 2  
RAB6B 2  
RP11-80F22.15 2  
RPL17 2  
TOMM34 2  
RP11-70C1.1 2  
DCAF4L1 2  
CIB1 2  
ANXA5 2  
RP11-849I19.1 2  
EPB41L3 2  
KCTD13 2  
MIR22HG 2  
DOCK8 2  
PDCL3 2  
CPEB1 2  
RGMA 2  
ALDOA 2  
ECHS1 2  
MXD4 2  
NUDT4 2  
DLX5 2  
EPC1 2  
PRKAG2 2  
CCDC106 2  
TEX12 2  
KLHL23 2  
SMAD9 2  
GABRB3 2  
AC018755.17 2  
TMEM123 2  
ENHO 2  
LCA5 2  
SRGAP1 2  
FAM43A 2  
TANC2 2  
ENO3 2  
TDP2 2  
LINC01030 2  
DUSP4 2  
KCNQ2 2  
SLU7 2  
IGSF10 2

AP1AR 2  
DDX43 2  
BAZ1A 2  
MRPL36 2  
BARX2 2  
WIPF3 2  
XAB2 2  
HEY2 2  
CSNK1E 2  
SIAH2 2  
SRP54 2  
PLEKHA3 2  
UPP1 2  
SLC9A3R2 2  
DYRK1A 2  
RAP1GDS1 2  
MAGEB16 2  
HEBP2 2  
SFXN1 2  
SUSD4 2  
CCDC117 2  
EMC3 2  
TATDN1 2  
KDM7A 2  
BIN1 2  
PALM 2  
BOK 2  
GPR27 2  
YAP1 2  
MRPL37 2  
KLF7 2  
PARD3 2  
RP11-506F3.1 2  
MRGBP 2  
CHN1 2  
TIMMDC1 2  
CAST 2  
GKAP1 2  
CTNNBIP1 2  
ZBTB20 2  
ARID3B 2  
COPS4 2  
CXXC4 2  
KLHL35 2  
ANXA2 2  
CBL 2  
CDC123 2  
ZFAND3 2  
DSCR3 2  
PSMD14 2  
MGAT4A 2  
GAREM1 2  
CLN6 2  
SMIM19 2  
WTIP 2  
ABRACL 2

DTNBP1 2  
AGBL5 2  
PRDX6 2  
FAM228B 2  
SAMD11 2  
CHTF8 2  
MT-ATP8 2  
ADA 2  
NRG1 2  
PLEKHO1 2  
BRD4 2  
SLC40A1 2  
KCNN2 2  
BCAP29 2  
NRIP1 2  
ATP6V1E2 2  
C5orf38 2  
MSRB3 2  
MIIP 2  
SMOX 2  
IFT88 2  
HMGB3 2  
ASZ1 2  
CDYL2 2  
TSPAN13 2  
PTAR1 2  
USP46 2  
AAED1 2  
NCK2 2  
RBKS 2  
RET 2  
GALNS 2  
MAGEF1 2  
ICA1 2  
CBX7 2  
FGFR1 2  
DEDD2 2  
EIF4ENIF1 2  
FERMT2 2  
APPBP2 2  
HNRNPH2 2  
SLC26A11 2  
UBE2L6 2  
HSPA4L 2  
DRAM2 2  
RAB20 2  
CXCL9 2  
PACS2 2  
CLASP1 2  
ISG15 2  
PRKACB 2  
MRPL47 2  
ATP5S 2  
CCDC3 2  
PRDM6 2  
APBA2 2

GPM6B 2  
ZNF787 2  
LMO2 2  
FTCD 2  
PPM1A 2  
RGS17 2  
LINC01481 2  
CIB2 2  
ZNF827 2  
ZNF521 2  
AIP 2  
PDE4DIP 2  
NINJ1 2  
SERTAD2 2  
LBR 2  
EPB41L4A 2  
AFF1 2  
FAM207A 2  
AC002467.7 2  
RP11-693J15.6 2  
CCDC94 2  
GRAMD1A 2  
PRMT9 2  
MTUS1 2  
ZNF106 2  
GSTO1 2  
L3MBTL3 2  
STXBP6 2  
ACTN1 2  
FYN 2  
KLF3 2  
ARHGAP32 2  
RP11-736K20.6 2  
SOBP 2  
CCDC91 2  
TFAP2A 2  
NT5DC1 2  
GPC1 2  
ATP6V1C1 2  
PPP2R2D 2  
CDS1 2  
MINK1 2  
MYH9 2  
TP53TG1 2  
RGS22 2  
IRS2 2  
CBR1 2  
ARID3A 2  
TAF4B 2  
TNNI3 2  
NR1D1 2  
PPP1R1A 2  
GSDMD 2  
AKAP7 2  
TARBP1 2  
C14orf37 2



INTS6 2  
FN1 2  
ZNF701 2  
CTC-241N9.1 2  
EPHX2 2  
DST 2  
PPP1R9A 2  
TPTEP1 2  
LINC01582 2  
L1TD1 3  
NANOS3 3  
CITED2 3  
ASB9 3  
PABPC4 3  
C12orf75 3  
ZNF462 3  
MEX3B 3  
GFRA1 3  
TMEM55A 3  
ADAMTS6 3  
TJP1 3  
IRF2BPL 3  
TMEM14C 3  
MEF2C 3  
FAM25G 3  
PTPRS 3  
RP11-101E5.1 3  
ZNF518A 3  
RGS10 3  
GCC2 3  
TCF7L2 3  
RAB11B 3  
SEPP1 3  
UXS1 3  
SOCS1 3  
FARP1 3  
ZC3H13 3  
DPPA4 3  
CD74 3  
LUZP4 3  
LTBP1 3  
TMEM181 3  
RP4-625H18.2 3  
FOXC2 3  
TADA3 3  
TLK2 3  
CTSF 3  
HMG20B 3  
ETV5 3  
ZEB2 3  
PCMTD1 3  
SLC25A31 3  
NACC2 3  
CCDC144A 3  
TPI1 3  
ZBED5-AS1 3

SLC7A10 3  
HHEX 3  
ZFAND2B 3  
BAMBI 3  
GCNT2 3  
GSTZ1 3  
SDC2 3  
EID1 3  
CCND2 3  
HNF1B 3  
GFRA2 3  
SSBP2 3  
TSTD1 3  
AC002454.1 3  
IRF2BP2 3  
ALKBH7 3  
AGMO 3  
RBMX 3  
GNAQ 3  
CYFIP1 3  
DAZAP2 3  
GRB14 3  
ZNF217 3  
SPRY1 3  
GRN 3  
CCDC109B 3  
COX8A 3  
A1BG 3  
IGF2BP1 3  
SEPT11 3  
OGFR 3  
COX14 3  
SERINC5 3  
AK5 3  
RP3-460G2.2 3  
TRIB2 3  
TPM2 3  
ARID5B 3  
AKR1C3 3  
NME4 3  
RP11-81A22.5 3  
DUSP6 3  
GNAL 3  
ROBO1 3  
VGLL4 3  
DBN1 3  
PIANP 3  
KRAS 3  
CCDC92 3  
IFIT1 3  
NME3 3  
TACC2 3  
RGS2 3  
USP12 3  
CTNND2 3  
RFXANK 3

MRPL28 3  
CDCA7L 3  
PDK2 3  
PNRC1 3  
CACNB4 3  
GTF2I 3  
PYGB 3  
IRF3 3  
FAM21A 3  
ITPKB 3  
CAMK2G 3  
METTL9 3  
ELK3 3  
PTPRG 3  
WDR60 3  
KLHDC8B 3  
BNC1 3  
SMAP2 3  
SLC35D2 3  
FLJ20021 3  
MRAS 3  
NUDT7 3  
TMEM251 3  
PLS3 3  
OTUD1 3  
DCTN2 3  
AP001372.2 3  
UBE2H 3  
COL9A3 3  
RAB4B 3  
MTMR14 3  
TDRD1 3  
NIPSNAP3A 3  
GABARAPL1 3  
TMEM261 3  
LRP5L 3  
ARPC1B 3  
SERTAD3 3  
RNF8 3  
LYPD6 3  
SPATC1L 3  
MPND 3  
POPDC3 3  
IMMP2L 3  
ZSCAN5A 3  
NAA10 3  
FGGY 3  
TGIF1 3  
FAT1 3  
RABGAP1 3  
NREP 3  
ZNF362 3  
MARK4 3  
NUDT11 3  
CDKN1B 3  
HOMER1 3

SPSB3 3  
FOXN3 3  
RHOG 3  
TXNDC12 3  
TCL1B 3  
SGK1 3  
RELL2 3  
BROX 3  
ANP32A 3  
TAF7L 3  
TATDN2 3  
RABL6 3  
TXNIP 3  
GLIS3 3  
BMPR1A 3  
PGM1 3  
TCN2 3  
BEND4 3  
ISOC2 3  
TJP2 3  
ZMYND8 3  
BCORL1 3  
KLHL42 3  
FKBP5 3  
FKBP1B 3  
TLL1 3  
VAMP5 3  
PHF8 3  
RP11-219A15.1 3  
DHRS11 3  
PNMAL1 3  
HDHD3 3  
EVPLL 3  
TP53INP1 3  
RBM24 3  
SALL4 3  
SCAND1 3  
TAF10 3  
TFDP3 3  
PRKD1 3  
ACOT13 3  
FLJ37035 3  
PHF6 3  
KLF12 3  
PPCS 3  
RNF187 3  
TLN2 3  
IMPA2 3  
U2AF1L4 3  
CD24 3  
NAA60 3  
MSRB2 3  
NDN 3  
RLN2 3  
STX7 3  
MSI2 3

LSM10 3  
CMTM7 3  
CELSR2 3  
RTCB 3  
RP4-816N1.6 3  
C8orf82 3  
PEX5 3  
KIAA1671 3  
TIAM1 3  
CCDC28B 3  
HERC1 3  
SLC25A13 3  
SNX7 3  
TRMT2A 3  
SYNRG 3  
PCBD1 3  
FAM3C 3  
CPNE1 3  
TOB1 3  
FAM21C 3  
PCLO 3  
C1orf122 3  
RP3-512B11.3 3  
SMIM10L1 3  
LIPT2 3  
TNFAIP8 3  
LINC01413 3  
ZNF532 3  
RNF44 3  
STX4 3  
CCDC71 3  
ADI1 3  
USP19 3  
LYRM5 3  
PPP1R10 3  
LEPROT 3  
IMP3 3  
DEK 4  
CHAF1A 4  
UBE2C 4  
DMRT1 4  
BIRC5 4  
COX20 4  
NENF 4  
CDT1 4  
PRC1 4  
ZWINT 4  
MKI67 4  
RRM2 4  
CCNA2 4  
SPC25 4  
CENPA 4  
CDCA5 4  
TYMS 4  
ASPM 4  
WDR34 4

DSN1 4  
DHFR 4  
TK1 4  
NUF2 4  
DIAPH3 4  
SNRNP25 4  
CDK1 4  
DPCD 4  
MND1 4  
ESCO2 4  
MYBL2 4  
UHRF1 4  
PCNA 4  
HIST1H2AA 4  
CDCA7 4  
NCAPG 4  
MCM7 4  
ISOC1 4  
BRI3BP 4  
PBK 4  
KIF22 4  
DNAJC9 4  
FBXO5 4  
SLF1 4  
E2F1 4  
PDLIM1 4  
RAD51 4  
NUDT1 4  
ITGB3BP 4  
MBD4 4  
PKMYT1 4  
CENPW 4  
CASP8AP2 4  
RIBC2 4  
FBLN2 4  
GTSE1 4  
SPC24 4  
CDC45 4  
STRA13 4  
ASF1B 4  
MSH2 4  
RFC2 4  
SNAPIN 4  
KIT 4  
YY2 4  
RSPH1 4  
POLD2 4  
WDR76 4  
CFAP53 4  
SKA3 4  
GPC4 4  
CTBP2 4  
PGP 4  
DCTPP1 4  
MCM2 4  
NCAPH2 4

CDCA3 4  
CDCA8 4  
RMI2 4  
SYNC 4  
SSX2IP 4  
POLD3 4  
C1GALT1 4  
RPA3 4  
CD99 4  
CPD 4  
TPRKB 4  
WEE1 4  
POLR3K 4  
XRCC2 4  
DCAF12L1 4  
MYO1B 4  
MCM5 4  
EFHD1 4  
CENPQ 4  
KLHL15 4  
HIST1H1A 4  
HJURP 4  
ECI1 4  
GMNN 4  
KIAA0101 4  
BRCA1 4  
MELK 4  
SKA1 4  
DDB2 4  
ILF3-AS1 4  
C21orf58 4  
PLTP 4  
ARHGEF26 4  
HACD2 4  
PNMA1 4  
CHRNA5 4  
MLX 4  
CHEK1 4  
CDKN3 4  
NAPRT 4  
HIST1H1C 4  
TEX9 4  
WNK3 4  
CARHSP1 4  
TMEM203 4  
FEN1 4  
APOA1BP 4  
MDM1 4  
PARPBP 4  
E2F2 4  
TRAF3IP1 4  
RRAGD 4  
RNF4 4  
LIMS1 4  
ARL6IP6 4  
C19orf48 4

FOXM1 4  
FRAT2 4  
FAM60A 4  
ZNF492 4  
HOXB3 4  
ZNF98 4  
MCM4 4  
MSH6 4  
KEAP1 4  
ZWILCH 4  
POLR1C 4  
PCGF2 4  
GLO1 4  
SEPSECS-AS1 4  
CKAP4 4  
KCTD5 4  
KIF2C 4  
MTSS1 4  
CNP 4  
RBPMS2 4  
CLPTM1L 4  
ATAD5 4  
ZNF711 4  
DLGAP5 4  
ENOPH1 4  
TCF19 4  
ZFYVE9 4  
DCAF7 4  
TSEN2 4  
SH3BGRL3 4  
ANLN 4  
TTK 4  
STIL 4  
RP5-821D11.7 4  
EXO1 4  
GXYLT1 4  
FANCD2 4  
SCML2 4  
TOPBP1 4  
DSCC1 4  
CENPM 4  
LRRC45 4  
TP53I13 4  
PXK 4  
MTERF3 4  
INCENP 4  
WDR90 4  
C22orf46 4  
NUSAP1 4  
SLC25A11 4  
MAD2L1BP 4  
POLG 4  
PLK1 4  
DNA2 4  
WHSC1 4  
EXOSC5 4



FMNL2 4  
CST6 4  
DHCR24 4  
KIAA1524 4  
RIIAD1 4  
ZSWIM6 4  
RCAN3 4  
MTFR2 4  
CCNE1 4  
KIF15 4  
VCPKMT 4  
GCAT 4  
KIF26A 4  
RMI1 4  
ATP2A1-AS1 4  
C11orf88 4  
NFI1 4  
LINC00221 4  
BLM 4  
AGPS 4  
PDZD8 4  
EFCAB14 4  
MASTL 4  
DIDO1 4  
HYOU1 4  
NPAT 4  
PIM1 4  
VCPIP1 4  
SNAPC3 4  
KIF23 4  
CEP55 4  
KCTD20 4  
AFMID 4  
TNKS2 4  
CXorf57 4  
CHAMP1 4  
AUTS2 4  
SPAG5 4  
CPNE7 4  
RBMXL3 4  
HBA2 4  
IGDCC3 4  
HOMER2 4  
HMMR 4  
AURKB 4  
SHCBP1 4  
OIP5 4  
ANP32E 4  
TRAIP 4  
BUB1B 4  
CASC5 4  
TRIAP1 4  
CCND1 4  
RACGAP1 4  
HNRNPA0 4  
SLC31A1 4

VRK1 4  
GJC1 4  
CENPF 4  
MRPS2 4  
NUP107 4  
C16orf13 4  
NDC80 4  
IFRD2 4  
RAD51AP1 4  
NMNAT1 4  
TCTN2 4  
SF3B3 4  
SLC35B3 4  
MEN1 4  
AEN 4  
CCZ1 4  
RBM26 4  
JPX 4  
RP11-379H18.1 4  
LMNB2 4  
SGOL2 4  
NEK2 4  
DDIAS 4  
APOPT1 4  
BUB1 4  
KIF20A 4  
MYH10 4  
TMEM231 4  
MECR 4  
AGTRAP 4  
SEPSECS 4  
RADIL 4  
POLE2 4  
HS2ST1 4  
HEXIM1 4  
NCAPH 4  
CRIP1 4  
DDX56 4  
EME1 4  
PRPF4 4  
CENPE 4  
CHMP4B 4  
ALG6 4  
SAAL1 4  
TMEM55B 4  
WDR77 4  
MDC1 4  
DEPDC1 4  
SKP2 4  
CCNT2 4  
TGFBFR1 4  
FGF14-AS2 4  
AURKA 4  
CKAP5 4  
THAP9-AS1 4  
UBR7 4

GADD45B 4  
IER5 4  
RAD18 4  
NCAPD2 4  
RRP1B 4  
PPTC7 4  
UBXN11 4  
TONSL 4  
USP39 4  
OXNAD1 4  
FBXO45 4  
ARHGEF39 4  
CPSF1 4  
C16orf91 4  
VTA1 4  
PP7080 4  
TARDBP 4  
ZNF138 4  
PRSS50 5  
CTCF 5  
PRSS21 5  
SYCP3 5  
DPEP3 5  
SYCE3 5  
PAGE1 5  
CLNS1A 5  
MYDGF 5  
SERBP1 5  
BOLL 5  
SMC1B 5  
MEIOC 5  
TEX101 5  
DDX21 5  
CALR 5  
HORMAD1 5  
LAMTOR1 5  
SELT 5  
VCX2 5  
C19orf60 5  
SRP9 5  
FAM173A 5  
SDF2L1 5  
FAM9B 5  
TCL1A 5  
REC8 5  
SSX3 5  
ATP6V0B 5  
GINS2 5  
TMSB10 5  
HSPA5 5  
SSR4 5  
C1D 5  
PNMA5 5  
CT55 5  
SAR1B 5  
SIL1 5

COX7B 5  
NDUFC1 5  
DMRTB1 5  
DAZL 5  
ZCCHC17 5  
TERF1 5  
PPP1R14A 5  
SEP15 5  
HSP90B1 5  
COA1 5  
DNAJC19 5  
FDX1 5  
COX17 5  
TUBA3D 5  
LRPAP1 5  
HDDC3 5  
CRELD2 5  
SEC11A 5  
MED30 5  
BOLA3 5  
GTF3C6 5  
EI24 5  
CNIH1 5  
TOP2A 5  
HBQ1 5  
SYCE1 5  
MRPS26 5  
KRTCAP3 5  
FMR1NB 5  
PDIA6 5  
ZNF280B 5  
WDR83OS 5  
ATRAID 5  
C1orf43 5  
TMED10 5  
PCMT1 5  
DENR 5  
C19orf52 5  
ZDHHC4 5  
CHCHD10 5  
MANF 5  
TM2D1 5  
TMED9 5  
CENPU 5  
CLSPN 5  
MRPL18 5  
BHMG1 5  
SPESP1 5  
TIMM8B 5  
TAF12 5  
NDUFAF3 5  
HIGD1A 5  
SQLE 5  
ATP6V0E1 5  
PIGS 5  
RSRP1 5

TXNDC15 5  
SDHD 5  
PAK1IP1 5  
CDKN2D 5  
KDEL2 5  
SLC35B2 5  
TCTEX1D2 5  
DHRS13 5  
FAM105A 5  
UNK 5  
TRIM44 5  
MLEC 5  
TMX1 5  
POLR3H 5  
C8orf59 5  
MYLIP 5  
MEIOB 5  
ESCO1 5  
TMEM179B 5  
ZNF544 5  
ERGIC3 5  
COQ10A 5  
E2F4 5  
ACP2 5  
PPIB 5  
MCFD2 5  
MEST 5  
VMP1 5  
NDUFS5 5  
CLN5 5  
PDCL2 5  
TUBA3E 5  
MLF2 5  
RTN3 5  
CHGB 5  
YEATS4 5  
GPAA1 5  
EXT2 5  
LPCAT3 5  
HSPA2 5  
MYL6 5  
BLOC1S6 5  
HELLS 5  
PCOLCE 5  
BLOC1S2 5  
DNMT1 5  
C11orf73 5  
TIPIN 5  
EFCAB2 5  
SSR2 5  
IQCB1 5  
ATF6B 5  
CT45A10 5  
CUTC 5  
DNPH1 5  
VBP1 5

MED31 5  
GINM1 5  
AUP1 5  
SMDT1 5  
CCNDBP1 5  
BRD8 5  
PAIP1 5  
FAM122A 5  
NMRAL1 5  
WRB 5  
CKB 5  
PRIM1 5  
KRIT1 5  
FAM98C 5  
RAB1A 5  
HMCES 5  
NT5C 5  
ZNF593 5  
ACTL8 5  
RIC8A 5  
DPH2 5  
YIPF6 5  
M6PR 5  
SOHLH2 5  
TUSC3 5  
SPEN 5  
CSPP1 5  
EIF2AK1 5  
PGRMC1 5  
H2AFY 5  
U82695.5 5  
RBM44 5  
SMIM20 5  
RBM28 5  
TMX2 5  
APMAP 5  
STMND1 5  
SLC39A1 5  
PRPSAP2 5  
NCSTN 5  
ZNF280C 5  
METTL10 5  
YDJC 5  
TBL2 5  
TMEM167A 5  
TMEM107 5  
DR1 5  
DCK 5  
UGT8 5  
SEC22C 5  
CTSA 5  
TRAPPC1 5  
C9orf142 5  
RAB30-AS1 5  
TFB2M 5  
RECK 5

SSSCA1 5  
AC240274.1 5  
NUS1 5  
HIBADH 5  
PRMT5 5  
TCTN3 5  
R3HDM2 5  
NMT2 5  
LRRCC1 5  
POLR2D 5  
MEI1 5  
QTRT1 5  
RBFA 5  
CD46 5  
IDH1 5  
C3orf33 5  
BFAR 5  
BET1 5  
ST3GAL5 5  
ANKRD54 5  
NOP16 5  
SPDL1 5  
MNAT1 5  
OS9 5  
CCDC24 5  
FANCA 5  
NARS 5  
NPC1 5  
NRIP3 5  
CDC6 5  
ECT2 5  
NAT10 5  
SKA2 5  
NUCB1 5  
ZNF800 5  
MDK 5  
ACRC 5  
HSPA1A 5  
UHRF1BP1L 5  
TCTN1 5  
LYRM2 5  
TEX11 5  
MPDU1 5  
PSPH 5  
TMEM30A 5  
FBXO3 5  
FCGRT 5  
CEP135 5  
ANKRD39 5  
DCAF4 5  
GINS1 5  
DLEU2 5  
SYCE2 5  
SLBP 5  
TUBA3C 5  
HMGB2 5

APRT 5  
NDUFA11 5  
TXN 5  
MAD2L1 5  
NIFK 5  
MRPL15 5  
MESDC2 5  
APP 5  
IFT22 5  
ORC6 5  
SUV39H2 5  
RNASEH2A 5  
NOC3L 5  
CD3EAP 5  
FAM96A 5  
IDI1 5  
DERL3 5  
DBI 5  
TIGAR 5  
RCL1 5  
UBE2Q2 5  
STARD7 5  
TUBA1C 5  
RHNO1 5  
C20orf27 5  
DPP7 5  
SMC6 5  
H2AFX 5  
LARP1 5  
CERCAM 5  
ENOSF1 5  
ARL6IP1 5  
CBY1 5  
PPP5C 5  
DFFA 5  
SRRM2-AS1 5  
MAGOHB 5  
DCPS 5  
PCNP 5  
CCPG1 5  
TSR1 5  
MAT2A 5  
DNAAF5 5  
RAD54L2 5  
NEK4 5  
ACAT1 5  
CNOT6 5  
ATPAF1 5  
FGFR4 5  
PPT1 5  
FBXW2 5  
C15orf48 6  
TEX19 6  
PEG10 6  
C5orf47 6  
SCML1 6



STRA8 6  
KIF5B 6  
CAPZA1 6  
EMC7 6  
MMP25-AS1 6  
F12 6  
CCDC73 6  
ETV7 6  
TMEM50B 6  
RP11-890B15.2 6  
C12orf65 6  
ACTR3 6  
CYSTM1 6  
CUTA 6  
SELK 6  
PIGK 6  
CGREF1 6  
DMKN 6  
CYP20A1 6  
ZRANB2 6  
AMN 6  
DNAJB9 6  
RNF34 6  
VPS36 6  
FUOM 6  
SPRYD7 6  
POP5 6  
CNTRL 6  
RP5-1139I1.1 6  
GDE1 6  
CLDN10 6  
NFE2L1 6  
RP11-366H4.1 6  
ZNF75A 6  
C10orf35 6  
GTF2H2 6  
ARL1 6  
ORMDL1 6  
CEP290 6  
LMNA 6  
NAA20 6  
OCIAD1 6  
SEC11C 6  
ZNF232 6  
MFSD4 6  
EIF2S1 6  
C11orf85 6  
RP11-53B5.1 6  
OAZ2 6  
LTBP4 6  
STRIP2 6  
TM7SF2 6  
KDELRL1 6  
FES 6  
KCNQ1OT1 6  
COMMD8 6

STK25 6  
PSORS1C1 6  
CTSL 6  
FUCA1 6  
ANKRD36C 6  
H1FO 6  
GIGYF2 6  
ACADVL 6  
TOP2B 6  
REEP5 6  
FOXD3-AS1 6  
NPTX2 6  
SCRN2 6  
YIPF4 6  
MRPL11 6  
ZNF91 6  
ARHGAP9 6  
LARS 6  
CHRNE 6  
MYADM 6  
C1orf228 6  
SPCS3 6  
MTRF1 6  
TMEM242 6  
LYRM9 6  
GGCT 6  
HOOK2 6  
UFL1 6  
THAP7 6  
FLYWCH2 6  
UNC50 6  
JADE3 6  
GALNT11 6  
LY6K 6  
ACBD3 6  
PFDN6 6  
TMEM141 6  
SDCBP2 6  
FAM208B 6  
CISD3 6  
ANKRD31 6  
RNF141 6  
PSMD5-AS1 6  
C4orf27 6  
CHMP4A 6  
FAM216A 6  
GEMIN2 6  
MRC2 6  
NUDT17 6  
GNPDA1 6  
PDE6D 6  
RNFT1 6  
OTUD6A 6  
GABPB2 6  
TP53I3 6  
ARHGAP5 6

TMEM80 6  
GPAT2 6  
PKN2 6  
ATP5G1 6  
TAF11 6  
HSD17B14 6  
TSPYL2 6  
HAUS5 6  
FPGS 6  
IARS 6  
SEMA3B 6  
PPIC 6  
CNPY3 6  
C1orf146 6  
ITPA 6  
SFRP5 6  
XX-CR54.1 6  
NOL8 6  
TRAM1 6  
CCDC47 6  
TMC7 6  
SMIM4 6  
PIK3IP1 6  
SLMAP 6  
TMEM216 6  
ITM2C 6  
TIMM22 6  
PDIK1L 6  
PROCR 6  
SLC39A6 6  
C14orf1 6  
LTBP3 6  
TIPRL 6  
TPST1 6  
CT47B1 6  
VWA9 6  
SLC25A4 6  
EPRS 6  
RDH11 6  
THOC7 6  
STEAP1 6  
HINT3 6  
NEURL1 6  
ZCCHC9 6  
TTC26 6  
SLC30A5 6  
UBA5 6  
GOPC 6  
DNAAF3 6  
CES4A 6  
RP11-620J15.3 6  
GEMIN6 6  
NUDT9 6  
C11orf70 6  
IFT81 6  
MCM3AP-AS1 6

ISY1 6  
FBXO6 6  
NT5C3A 6  
C19orf57 6  
EIF2B1 6  
CES2 6  
TMX4 6  
PXYLP1 6  
CCDC152 6  
MAP7 6  
ANKRD36 6  
LRRC41 6  
KMT5C 6  
JMJD8 6  
PLA2G12A 6  
CISD2 6  
MYBBP1A 6  
SFR1 6  
FADS1 6  
AARS 6  
TINF2 6  
ATP6AP2 6  
MAGEA10 6  
GPR160 6  
RP11-69G7.1 6  
RBM6 6  
METTL14 6  
FXN 6  
TMED7 6  
TUBB8 6  
FAM9A 6  
RHBDD3 6  
EP400 6  
RALGAPA1 6  
SNX13 6  
RPAP3 6  
GTF2H3 6  
PDHA1 6  
TMEM52 6  
SBF2-AS1 6  
DHRSX 6  
TACC1 6  
B9D1 6  
DHRS4-AS1 6  
MKRN2 6  
NFKBIE 6  
MED7 6  
HTRA2 6  
FAM157C 6  
ASH1L 6  
C17orf64 6  
CREG1 6  
MMP9 6  
GGT7 6  
ATG16L2 6  
TWISTNB 6

CCDC79 6  
FOXRED2 6  
CCDC113 6  
VARS 6  
FNDC3A 6  
SDR39U1 6  
AK3 6  
HS1BP3 6  
DMC1 6  
ZNF559 6  
CDK18 6  
ZFC3H1 6  
C8orf88 6  
RPAIN 6  
PDPK1 6  
FXYD1 6  
RILP 6  
SYTL1 6  
UTP23 6  
SENP1 6  
SYCP2 6  
ATG9B 6  
ZNF17 6  
KLRG1 6  
VEZT 6  
YTHDC2 6  
C5orf15 6  
KIAA0100 6  
HCFC2 6  
KMT2A 6  
CRELD1 6  
NUMB 6  
KCTD9 6  
C17orf75 6  
IFNAR1 6  
TMEM33 6  
LLNLR-245B6.1 6  
TMEM206 6  
LPGAT1 6  
KIDINS220 6  
KLHDC9 6  
RP11-78J21.4 6  
ZFP62 6  
HSDL2 6  
ERLIN2 6  
MFSD3 6  
MYT1 6  
GNPTG 6  
SLC7A6 6  
RP11-181C3.1 6  
SUMF2 6  
DHX34 6  
SORL1 6  
SH3YL1 6  
RRN3 6  
PGAP2 6

PROSER1 6  
MESP1 6  
URB1 6  
FAM9C 6  
MBIP 6  
SVIL-AS1 6  
PGM2L1 6  
RNGTT 6  
ARMT1 6  
BSCL2 6  
CRY1 6  
ACO1 6  
POU2F2 6  
FAM219B 6  
LINC00667 6  
FAAH 6  
C18orf25 6  
RP11-152N13.5 6  
UBE3D 6  
TRAFD1 6  
C7orf49 6  
ZNF883 6  
DNAAF2 6  
ZPBP 6  
SMIM13 6  
TUBB2A 6  
RC3H2 6  
POLK 6  
SLC11A2 6  
ZNF398 6  
DZIP1 6  
DPF1 6  
HPCAL1 6  
METTL17 6  
TCHH 6  
TMUB1 6  
DSEL 6  
ABCC5 6  
FAM41C 6  
AKAP1 6  
TMCO6 6  
EFCAB13 6  
CBWD2 6  
STEAP1B 6  
ZBED5 6  
RALGPS2 6  
EYA3 6  
RANBP6 6  
SPOPL 6  
RBM26-AS1 6  
NEAT1 6  
KIAA1211L 6  
ATPAF2 6  
CCDC136 6  
ETNK1 6  
CMB9-22P13.1 6

PTGR2 6  
MIS12 6  
TMEM138 6  
STT3A 6  
CLUH 6  
SOX15 6  
CMTM3 6  
SPIRE1 6  
ZFAND1 6  
KLHL22 6  
CAAP1 6  
ARHGEF10 6  
GCHFR 6  
UTP15 6  
PGGT1B 6  
TM7SF3 6  
BORCS8 6  
DPY19L4 6  
MTMR6 6  
NUP43 6  
MAFG-AS1 6  
MFN2 6  
TOP1 6  
STAG3 6  
PUS1 6  
COQ2 6  
PI4K2B 6  
ZNF326 6  
EPB41L4B 6  
CEP164 6  
RNF103 6  
SLC27A5 6  
SLC5A5 6  
SRSF1 6  
ZDHHC13 6  
ICE1 6  
RAB11FIP1 6  
SAMD8 6  
NET1 6  
DIMT1 6  
CDK8 6  
INTS5 6  
RP13-1032I1.7 6  
LMAN2L 6  
SEC24B 6  
ZNF551 6  
TMEM234 6  
PEX3 6  
COQ3 6  
CEP41 6  
PCGF6 6  
FCHO2 6  
NECAP1 6  
OSTM1 6  
LIG3 6  
PXN-AS1 6

SNHG25 6  
ZNF146 6  
TM9SF1 6  
ZNF791 6
